# Supplementary material for: Regulating iminophosphorane PN bond reactivity through geometric constraints with cage-shaped triarylphosphines
Source: Royal Society of Chemistry journal article supplement (doi:10.1039/d4cc01868k), 2024-01-01
Supplement: d4cc01868k1.pdf [file d4cc01868k1.pdf]

# **Regulating Iminophosphoranes P=N bonds Reactivity Through Geometric Constraints with Cage-Shaped Triarylphosphines**

Lei Hu, Sayandip Chakraborty, Nikolay Tumanov, Johan Wouters, Raphael Robiette, and  
Guillaume Berionni

## Contents

|                                                 |       |
|-------------------------------------------------|-------|
| 1. General experimental procedures              | p 3   |
| 2. Calculation of pyramidization angle $\alpha$ | p 3   |
| 3. Synthesis and characterization of compounds  | p 4   |
| 4. Copies of NMR spectra                        | p 17  |
| 5. Crystallographic data                        | p 44  |
| 6. Computational methods                        | p 49  |
| 7. Structures and energies                      | p 52  |
| 8. References                                   | p 172 |
|                                                 |       |

## 1. General experimental procedures.

### 1.1. General information

All the catalytic and stoichiometric reactions have been carried out under argon or nitrogen atmosphere using a standard Schlenk line and glove box technique in oven dried glassware. Reaction temperatures are disclosed as the temperature of the bath surrounding the vessel unless otherwise mentioned.

*Chemicals and Materials.* 4Å Molecular sieves were dried at 400 °C under high vacuum for 3 days and stored in a glove box. Diethylether, tetrahydrofuran, toluene and dichloromethane were dried with an MBraun solvent purification system and stored under argon. CD<sub>2</sub>Cl<sub>2</sub> was dried over preactivated 4Å molecular sieves and stored in a glovebox, all others solvents were dried over CaH<sub>2</sub>, distilled and stored over preactivated 4Å molecular sieves in a glove box prior to use. Others reagents and chemicals were purchased from Sigma-Aldrich, Alfa Aesar, TCI and Fluorochem and used without further purification.

*Analytical:* NMR spectra were recorded on 400 or 500 MHz NMR JEOL spectrometers. The observed signals are reported in parts per million (ppm) relative to the residual signal of the non-deuterated solvent for <sup>1</sup>H and <sup>13</sup>C NMR spectra. The following abbreviations are used to describe multiplicities s = singlet, d = doublet, t = triplet, q = quartet, quin = quintuplet, br = broad, m = multiplet. The external references considered as 0.0 ppm are borontrifluoride etherate (BF<sub>3</sub>·Et<sub>2</sub>O) for <sup>11</sup>B NMR, trichloromonofluoromethane (CFCl<sub>3</sub>) for <sup>19</sup>F NMR and H<sub>3</sub>PO<sub>4</sub> (85%) for <sup>31</sup>P NMR. Melting points were determined on a Büchi B-545 device and are not corrected. Infrared spectra were recorded on a PerkinElmer FT-IR Spectrometer. MALDI ionization was performed on a WATERS QTOF Premier mass spectrometer.

*Chromatography.* Flash chromatography was performed using silica gel Silica Flash® 40-63 micron (230-400 mesh) from Sigma-Aldrich. TLC detection was accomplished by irradiation with a UV lamp at 265 or 313 nm and Iodine strain.

- 2. Calculation of pyramidization angle  $\alpha$  :** The pyramidization angle  $\alpha$  was calculated according to the following procedure. In the crystallographic structure of the phosphines, a hypothetical plane containing three C<sub>sp2</sub> carbon atoms (connected to P atom) was drawn. The distance between phosphorus and the plane was measured. The P - C<sub>sp2</sub> bond length can also be measured easily. Then the pyramidization angle  $\alpha$  can be easily determined by inverse trigonometric sine function (asin) according to the diagram below or can be directly

determined via placing a plan going through the carbon atoms attached to P using the Mercury software.

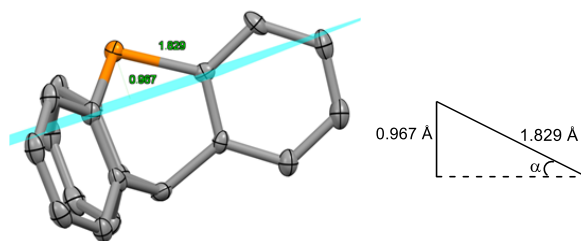

$$\sin \alpha = (0.967 / 1.829) = 0.5, \alpha = \sin^{-1}(0.5) = 0.52 \text{ rad}, \alpha = 29.8^\circ$$

### 3. Synthesis and Characterization of compounds

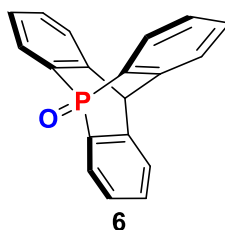

Compound **6** was prepared according to the described procedure. 9-phosphatriptycene **5** (1.0 g, 3.6 mmol) was dissolved in DCM (20 mL) in a 100 mL flask and a solution of H<sub>2</sub>O<sub>2</sub> in water (40 mL, 3%) was added, then the reaction mixture was stirred at room temperature for 1 h. After 1 h later; the layers were separated, and the organic phase was dried over Na<sub>2</sub>SO<sub>4</sub>. Evaporation of the organic solvent produced pure 9-phosphatriptycene oxide **6** (0.985 g, 95%) as colorless needles.

**<sup>1</sup>H NMR** (500 MHz, Chloroform-*d*)  $\delta$  8.04 – 7.97 (m, 3H), 7.54 – 7.47 (m, 3H), 7.29 – 7.20 (m, 6H), 5.42 (s, 1H).

**<sup>13</sup>C NMR** (126 MHz, Chloroform-*d*)  $\delta$  147.59 (d,  $J = 7.0$  Hz), 133.40 (d,  $J = 96.2$  Hz), 130.05 (d,  $J = 1.8$  Hz), 128.38 (d,  $J = 6.0$  Hz), 126.23 (d,  $J = 12.1$  Hz), 125.51 (d), 53.99 (d,  $J = 18.6$  Hz).

**<sup>31</sup>P NMR** (202 MHz, Chloroform-*d*)  $\delta$  7.38.

**IR** (neat, ATR):  $\tilde{\nu} / \text{cm}^{-1} = 1589, 1440, 1282, 1232$  ( $\nu_{\text{P=O}}$ , str), 1178, 1130, 1064, 857, 762, 704, 612, 556.

**M.p.:** 284-286 °C

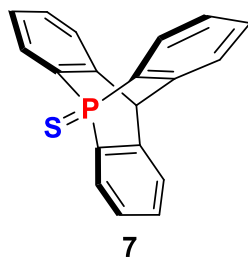

Compound **7** was prepared by slightly modifying procedure described in relative literature.<sup>1</sup> A suspension of **5** (46 mg, 0.12 mmol) and Lawesson's reagent (234.5 mg, 0.58 mmol) in toluene (10 mL) was refluxed overnight. The solvents were removed under reduced pressure and the resulting crude was purified by column chromatography giving **7** as a white solid (29 mg, 0.096 mmol, 80%). The corresponding crystal suitable for X-ray structure analysis was obtained by slow evaporation of a saturated solution of **7** in CHCl<sub>3</sub>/ EtOH.

**<sup>1</sup>H NMR** (500 MHz, Chloroform-*d*)  $\delta$  8.07 – 8.00 (m, 3H), 7.56 – 7.52 (m, 3H), 7.31 – 7.23 (m, 6H), 5.54 (s, 1H).

**<sup>13</sup>C NMR** (126 MHz, Chloroform-*d*)  $\delta$  146.98 (d,  $J = 4.1$  Hz), 133.81 (d,  $J = 78.8$  Hz), 130.06 (d,  $J = 2.4$  Hz), 128.70 (d,  $J = 9.1$  Hz), 126.26 (d,  $J = 13.1$  Hz), 125.31 (d,  $J = 7.8$  Hz), 54.82 (d,  $J = 16.3$  Hz).

**<sup>31</sup>P NMR** (202 MHz, Chloroform-*d*)  $\delta$  12.71.

**IR** (neat, ATR):  $\tilde{\nu} / \text{cm}^{-1} = 3059, 2924, 2854, 1586, 1442, 1274, 1135, 1071, 1057, 1021, 956, 860$  ( $\nu_{\text{P}=\text{S}}$ , str), 850, 745, 696, 678, 637, 610, 543, 462.

**M.p.:** 316-318 °C

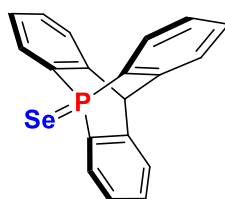

**8**

Compound **8** was prepared by slightly modifying procedure described in relative literature.<sup>1</sup> In a pre-dried 25ml Schlenk flask **5** (46 mg, 0.17 mmol) and Se powder (110 mg, 1.4 mmol) was added in Ar atmosphere. Then CDCl<sub>3</sub> (4.0 ml) was added, and the resulting mixture was refluxed for 3 h. Then the residual elemental selenium was filtered off and the solvent was removed under reduced pressure to obtain **8** as white solid (47 mg, 0.13 mmol, 76%).

**<sup>1</sup>H NMR** (500 MHz, Chloroform-*d*) δ 8.06 – 8.00 (m, 3H), 7.56 – 7.52 (m, 3H), 7.31 (t, *J* = 1.4 Hz, 1H), 7.30 (t, *J* = 1.4 Hz, 4H), 7.29 – 7.26 (m, 3H), 7.25 (dd, *J* = 3.1, 1.2 Hz, 1H), 5.58 (s, 1H).

**<sup>13</sup>C NMR** (126 MHz, Chloroform-*d*) δ 146.75 (d, *J* = 2.3 Hz), 132.80 (d, *J* = 70.4 Hz), 130.21 (d, *J* = 2.1 Hz), 129.63 (d, *J* = 10.6 Hz), 126.27 (d, *J* = 13.4 Hz), 125.20 (d, *J* = 7.2 Hz), 55.54 (d, *J* = 15.1 Hz).

**<sup>31</sup>P NMR** (202 MHz, Chloroform-*d*) δ 4.52 (s, <sup>1</sup>*J*<sub>SeP</sub> = 821.7 Hz {sattelite}).

**IR** (neat, ATR):  $\tilde{\nu}$  / cm<sup>-1</sup> = 2922, 2852, 1587, 1449, 1378, 1273, 1232, 1179, 1131, 1068, 1059, 1021, 857, 847, 763, 748, 696, 611 ( $\nu_{\text{P=Se}}$ , str), 584, 573, 558, 539.

**M.p.:** 76-78 °C(dec)

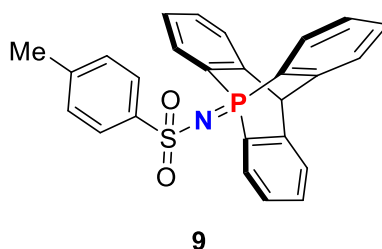

Compound **9** was prepared by following the discussed procedure. 9-phosphatriptycene **5** (100 mg, 0.36 mmol) was dissolved in Et<sub>2</sub>O-DCM (2 mL) in a 25 mL flask and a solution of *p*-toluenesulfonyl azide (78 mg in 1 mL DCM, 0.40 mmol) was added, then the reaction mixture was stirred at 40 °C for 4 h. The solution was evaporated in vacuo and the residue was washed with MeOH (5 mL). The mixture was filtered to afford **9** as a white solid (146 mg, 0.33 mmol, 91%). The corresponding crystal suitable for X-ray structure analysis was obtained by slow evaporation of a saturated solution of **9** in EtOAc.

**<sup>1</sup>H NMR** (400 MHz, Chloroform-*d*) δ 8.28 – 8.10 (m, 4H), 7.64 – 7.48 (m, 3H), 7.43 – 7.14 (m, 9H), 5.53 (s, 1H), 2.46 (s, 3H).

**<sup>13</sup>C NMR** (126 MHz, Chloroform-*d*) δ 147.12 (d, *J* = 7.5 Hz), 143.03 (d, *J* = 6.5 Hz), 141.82, 130.78 (d, *J* = 2.5 Hz), 130.34, 130.11 (d, *J* = 5.9 Hz), 129.57, 129.41, 126.62 (d, *J* = 12.7 Hz), 126.16, 125.65 (d, *J* = 9.5 Hz), 54.61 (d, *J* = 19.8 Hz), 21.65.

**<sup>31</sup>P NMR** (161 MHz, Chloroform-*d*) δ -7.51.

**IR** (neat, ATR):  $\tilde{\nu}$  / cm<sup>-1</sup> = 1588, 1444, 1272, 1197, 1178, 1143, 1091, 1064, 892, 864, 850, 819, 782, 759, 702, 691, 666, 610, 577, 556, 542, 513.

**HRMS (ESI<sup>+</sup>)**: Calcd. for C<sub>26</sub>H<sub>21</sub>O<sub>2</sub>NPS [M + H]<sup>+</sup>: 442.10251, found: 442.10250.

**M.p.**: 347-348 °C

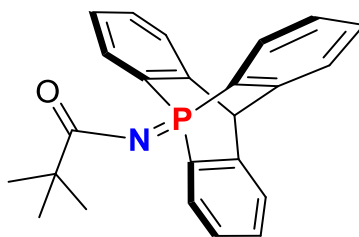

**10**

Compound **10** was prepared according to the procedure described in the literature.<sup>2</sup> Pivalic anhydride (2.0 mL, 9.9 mmol) and sodium azide (0.77 g, 11.8 mmol) were stirred in dry, degassed acetone (100 mL) for 10 min. 9-phosphatriptycene **5** (2.7 g, 9.9 mmol) was added in one portion and the resulting solution was stirred at room temperature for 72 h. The solvent was removed under reduced pressure and the solid extracted into dichloromethane (40 mL) and filtered. Diethyl ether (60 mL) was added, and the solution was stored at 25 ° C. Compound **10** crystallized as white crystals (1.7 g, 4.6 mmol, 46%).

<sup>1</sup>H NMR (400 MHz, Chloroform-*d*) δ 7.96 (dd, *J* = 12.0, 7.2 Hz, 3H), 7.58 – 7.48 (m, 3H), 7.32 – 7.16 (m, 6H), 5.53 (s, 1H), 1.54 (d, *J* = 0.9 Hz, 9H).

<sup>13</sup>C NMR (100 MHz, Chloroform-*d*) δ 192.82 (d, *J* = 11.4 Hz), 147.46 (d, *J* = 5.6 Hz), 130.75 (d, *J* = 90.8 Hz), 130.10 (d, *J* = 1.3 Hz), 129.99 (d, *J* = 6.4 Hz), 126.21 (d, *J* = 12.0 Hz), 125.48 (d, *J* = 8.4 Hz), 54.96 (d, *J* = 17.6 Hz), 41.92 (d, *J* = 17.4 Hz), 29.13.

<sup>31</sup>P NMR (161 MHz, Chloroform-*d*) δ -5.54.

HRMS (ESI<sup>+</sup>): Calcd. for C<sub>24</sub>H<sub>23</sub>ONP [M + H]<sup>+</sup>: 372.15118, found: 372.15088.



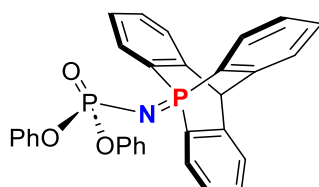

**11**

Compound **11** was prepared by following the discussed procedure. 9-phosphatriptycene (100 mg, 0.36 mmol) was dissolved in Et<sub>2</sub>O-DCM (2 mL) in a 25 mL flask and a solution of diphenylphosphoryl azide (110 mg in 1 mL DCM, 0.40 mmol) was added, then the reaction mixture was stirred at 40 °C for 4h. The solution was evaporated in vacuo and the residue was washed with MeOH (5 mL). The mixture was filtered to afford **11** as a white solid (156 mg, 0.3 mmol, 82%). The corresponding crystal suitable for X-ray structure analysis was obtained by slow evaporation of a saturated solution of **11** in EtOAc.

<sup>1</sup>H NMR (400 MHz, Chloroform-*d*) δ 8.01 (dd, *J* = 13.4, 7.0 Hz, 3H), 7.51 (dd, *J* = 6.7, 6.0 Hz, 3H), 7.46 (ddd, *J* = 6.5, 2.2, 1.1 Hz, 4H), 7.34 (t, *J* = 7.8 Hz, 4H), 7.27 (tt, *J* = 7.5, 1.1 Hz, 2H), 7.21 – 7.12 (m, 6H), 5.47 (s, 1H).

<sup>13</sup>C NMR (100 MHz, Chloroform-*d*) δ 152.61 (d, *J* = 7.7 Hz), 147.17 (d, *J* = 7.8 Hz), 131.23 (dd, *J* = 99.7, 3.3 Hz), 130.48 (d, *J* = 1.5 Hz), 129.59, 129.36 (d, *J* = 5.8 Hz), 126.51 (d, *J* = 12.7 Hz), 125.50 (d, *J* = 9.5 Hz), 124.28, 121.01 (d, *J* = 4.9 Hz), 54.32 (d, *J* = 20.1 Hz).

<sup>31</sup>P NMR (161 MHz, Chloroform-*d*) δ -5.20 (d, *J* = 36.9 Hz), -10.63 (d, *J* = 37.0 Hz).

HRMS (ESI<sup>+</sup>): Calcd. for C<sub>31</sub>H<sub>24</sub>O<sub>3</sub>NP<sub>2</sub> [M + H]<sup>+</sup>: 520.12259, found: 520.12186.

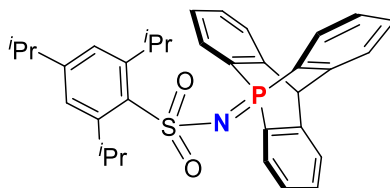

**12**

Compound **12** was prepared by following the discussed procedure. 9-phosphatriptycene **5** (100 mg, 0.36 mmol) was dissolved in Et<sub>2</sub>O-DCM (2 mL) in a 25 mL flask and 2,4,6-triisopropylbenzenesulfonyl azide (10-15% water) (0.113 gm, 0.40 mmol) was added, then the reaction mixture was stirred at 40 °C for 4 h. The solution was evaporated in vacuo and the residue was washed with MeOH (5 mL). The mixture was filtered to afford **12** as a white solid (183 mg, 0.33 mmol, 91%). The corresponding crystal suitable for X-ray structure analysis was obtained by slow evaporation of a saturated solution of **12** in EtOAc.

**<sup>1</sup>H NMR** (400 MHz, Methylene Chloride-*d*<sub>2</sub>) δ 8.02 (dd, *J* = 13.2, 7.3 Hz, 3H), 7.67 – 7.54 (m, 3H), 7.33 (td, *J* = 7.5, 1.1 Hz, 3H), 7.30 – 7.19 (m, 5H), 5.59 (s, 1H), 4.91 – 4.78 (m, 2H), 3.01 – 2.89 (m, 1H), 1.35 (d, *J* = 6.8 Hz, 12H), 1.30 (d, *J* = 6.9 Hz, 6H).

**<sup>13</sup>C NMR** (126 MHz, Methylene Chloride-*d*<sub>2</sub>) δ 151.88, 148.87, 147.73 (d, *J* = 7.3 Hz), 131.19 (d, *J* = 2.0 Hz), 131.13, 130.36, 130.27 (d, *J* = 5.8 Hz), 126.84 (d, *J* = 12.5 Hz), 126.21 (d, *J* = 9.3 Hz), 123.93, 54.89 (d, *J* = 19.3 Hz), 34.76, 29.89, 25.18, 24.09.

**<sup>31</sup>P NMR** (161 MHz, Methylene Chloride-*d*<sub>2</sub>) δ -7.61.

**HRMS (ESI<sup>+</sup>)**: Calcd. for C<sub>34</sub>H<sub>37</sub>O<sub>2</sub>NPS [M + H]<sup>+</sup>: 554.22771, found: 554.22780.

**IR** (neat, ATR):  $\tilde{\nu}$  / cm<sup>-1</sup> = 2957, 2924, 2865, 1599, 1588, 1448, 1441, 1384, 1363, 1276, 1249, 1190, 1167, 1126, 1061, 783, 760, 753, 711, 701, 691, 674, 611, 590, 555, 535, 488.

**M.p.**: 285-287 °C

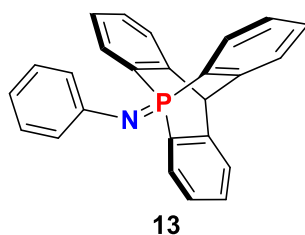

Compound **13** was prepared by the procedure described below. 9-phosphatriptycene **5** (100 mg, 0.36 mmol) was dissolved in dry Et<sub>2</sub>O (2 mL) in a 25 mL flask and a solution of azidobenzene (0.8M in *t*-butyl methyl ether) 0.40 mmol was added, then the reaction mixture was refluxed for 2 h. After 1 h, white precipitate started to appear. After an additional 1 h of stirring, the mixture was filtered through sintered funnel and washed with distilled Et<sub>2</sub>O (5 mL) to afford **13** as a white solid (98 mg, 0.27 mmol, 74%). The corresponding crystal suitable for X-ray structure analysis was obtained by slow evaporation of a saturated solution of **13** in Et<sub>2</sub>O.

**<sup>1</sup>H NMR** (500 MHz, Chloroform-*d*) δ 8.03 – 7.95 (m, 3H), 7.55 (dd, *J* = 7.4, 4.5 Hz, 3H), 7.28 (tdd, *J* = 3.7, 2.4, 1.2 Hz, 4H), 7.26 – 7.24 (m, 1H), 7.23 – 7.17 (m, 5H), 6.85 (tt, *J* = 7.1, 1.3 Hz, 1H), 5.48 (s, 1H).

**<sup>13</sup>C NMR** (126 MHz, Chloroform-*d*) δ 150.60, 147.87 (d, *J* = 6.0 Hz), 132.69, 131.97, 129.93 (d, *J* = 2.3 Hz), 129.70 (d, *J* = 6.0 Hz), 129.08 (d, *J* = 2.3 Hz), 126.11 (d, *J* = 11.8 Hz), 125.60 (d, *J* = 8.3 Hz), 123.34 (d, *J* = 20.1 Hz), 118.26, 54.51 (d, *J* = 17.5 Hz).

**<sup>31</sup>P NMR** (202 MHz, Chloroform-*d*) δ -20.38.

**HRMS (ESI<sup>+</sup>)**: Calcd. for C<sub>25</sub>H<sub>18</sub>NP [M + H]<sup>+</sup>: 364.1250, found: 364.1272.

**IR** (neat, ATR):  $\tilde{\nu}$  / cm<sup>-1</sup> = 1588, 1481, 1448, 1327, 1277, 1264, 1173, 1143, 1096, 1064, 1040, 1017, 859, 758, 750, 708, 697, 612, 570, 548.

**M.p.**: 240-242 °C (dec)

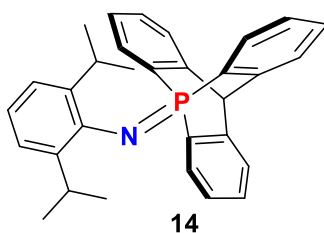

Compound **14** was prepared by the procedure described below. 9-phosphatriptycene **5** (50 mg, 0.18 mmol) was dissolved in toluene (4 mL) in a 25 mL flask and 0.2 mmol of 2,6-diisopropylphenyl azide was added, then the reaction mixture was heated at 80 °C overnight. Then the solvent was evaporated at low pressure to afford **14** as a white solid (68.5 mg, 0.15 mmol, 85%). The corresponding crystal suitable for X-ray structure analysis was obtained by slow evaporation of a saturated solution of **14** in CH<sub>2</sub>Cl<sub>2</sub>.

**<sup>1</sup>H NMR** (500 MHz, Chloroform-*d*) δ 7.95 (dd, *J* = 11.6, 7.3 Hz, 3H), 7.51 (dd, *J* = 7.1, 5.1 Hz, 3H), 7.27 (s, 1H), 7.24 (d, *J* = 7.5 Hz, 3H), 7.21 – 7.16 (m, 5H), 5.39 (s, 1H), 3.93 (hept, *J* = 6.8 Hz, 2H), 1.21 (d, *J* = 6.8 Hz, 12H).

**<sup>13</sup>C NMR** (126 MHz, Chloroform-*d*) δ 147.79 (d, *J* = 6.8 Hz), 143.35, 142.93 (d, *J* = 7.3 Hz), 135.15 (d, *J* = 93.5 Hz), 129.69 – 129.57 (m), 129.32 (d, *J* = 5.0 Hz), 126.02 (d, *J* = 11.4 Hz), 125.47 (d, *J* = 8.6 Hz), 122.83, 120.38 – 120.04 (m), 54.33 (d, *J* = 17.6 Hz), 28.92, 24.12.

**<sup>31</sup>P NMR** (202 MHz, Chloroform-*d*) δ -33.50.

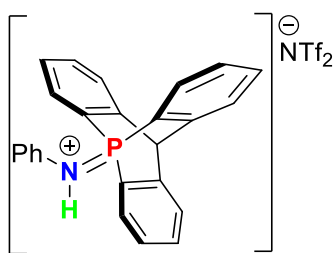

**15**

Compound **15** was prepared by the procedure described below. An NMR tube was charged with triflimidic acid (NHTf<sub>2</sub>) (7.9 mg,  $2.8 \times 10^{-2}$  mmol), 9-phosphatriptycene imine **13** (10.2 mg,  $2.8 \times 10^{-2}$  mmol), and 0.6 mL of CDCl<sub>3</sub> inside a glove box. After measurements of the NMR spectra, the solvent was slowly evaporated inside glove box to get the crystals suitable for X-ray analysis (16.5 mg,  $2.5 \times 10^{-2}$  mmol, 91%).

**<sup>1</sup>H NMR** (500 MHz, Chloroform-*d*) δ 8.40 (d,  $J = 12.3$  Hz, 1H), 7.95 – 7.88 (m, 3H), 7.77 (d,  $J = 6.9$  Hz, 3H), 7.49 – 7.38 (m, 7H), 7.33 – 7.24 (m, 4H), 5.91 (s, 1H).

**<sup>13</sup>C NMR** (101 MHz, Chloroform-*d*) δ 146.95 (d,  $J = 7.7$  Hz), 136.70, 132.86, 130.36, 129.68, 127.44 (d,  $J = 13.1$  Hz), 127.05 (d,  $J = 10.1$  Hz), 125.55, 124.12, 123.16, 120.31 (d,  $J = 7.5$  Hz), 54.80 (d,  $J = 22.9$  Hz).

**<sup>31</sup>P NMR** (202 MHz, Chloroform-*d*) δ 10.66.

**<sup>19</sup>F NMR** (471 MHz, Chloroform-*d*) δ -78.51.

**HRMS (ESI<sup>+</sup>)**: Calcd. for C<sub>25</sub>H<sub>19</sub>NP<sup>+</sup> [M]<sup>+</sup>: 364.1250, found: 364.1277.

**IR** (neat, ATR):  $\tilde{\nu} / \text{cm}^{-1} = 3214, 1603, 1589, 1499, 1446, 1413, 1351, 1182, 1135, 1054, 989, 747, 711, 610, 570, 545.$

**M.p.**: 187-188 °C (dec)

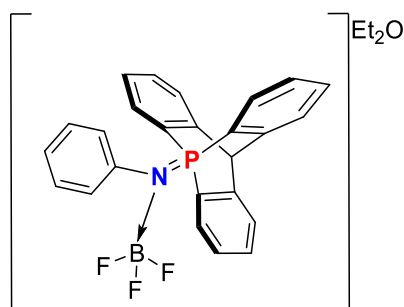

**16**

Compound **16** was prepared by the procedure described below. An NMR tube was charged with 9-phosphatriptycene imine **13** (10.2 mg,  $2.8 \times 10^{-2}$  mmol), Boron trifluoride ethyl etherate ( $2.8 \times 10^{-2}$  mmol, 3.45  $\mu$ L) and 0.6 mL of  $\text{CD}_2\text{Cl}_2$  inside a glove box. After measurements of the NMR spectra, the solvent was slowly evaporated inside glove box to get the crystals suitable for X-ray analysis (16.5 mg,  $2.5 \times 10^{-2}$  mmol, 85%).

**$^1\text{H}$  NMR** (400 MHz, Methylene Chloride- $d_2$ )  $\delta$  7.70 – 7.62 (m, 4H), 7.58 (d,  $J = 6.7$  Hz, 2H), 7.52 – 7.31 (m, 8H), 7.23 (s, 3H), 5.68 (s, 1H).

**$^{13}\text{C}$  NMR** (101 MHz, Methylene Chloride- $d_2$ )  $\delta$  147.64 (d,  $J = 6.0$  Hz), 141.26 – 141.11 (m), 131.75, 130.85 (d,  $J = 5.5$  Hz), 130.03, 129.70 (d,  $J = 5.4$  Hz), 127.61, 127.39, 127.14 (d,  $J = 12.3$  Hz), 126.56 (d,  $J = 9.6$  Hz), 55.56 (d,  $J = 20.1$  Hz).

**$^{31}\text{P}$  NMR** (202 MHz, Methylene Chloride- $d_2$ )  $\delta$  9.23 (m).

**$^{11}\text{B}$  NMR** (160 MHz, Methylene Chloride- $d_2$ )  $\delta$  -0.92.

**$^{19}\text{F}$  NMR** (471 MHz, Methylene Chloride- $d_2$ )  $\delta$  -139.87 (m,  $J = 18.2$  Hz)

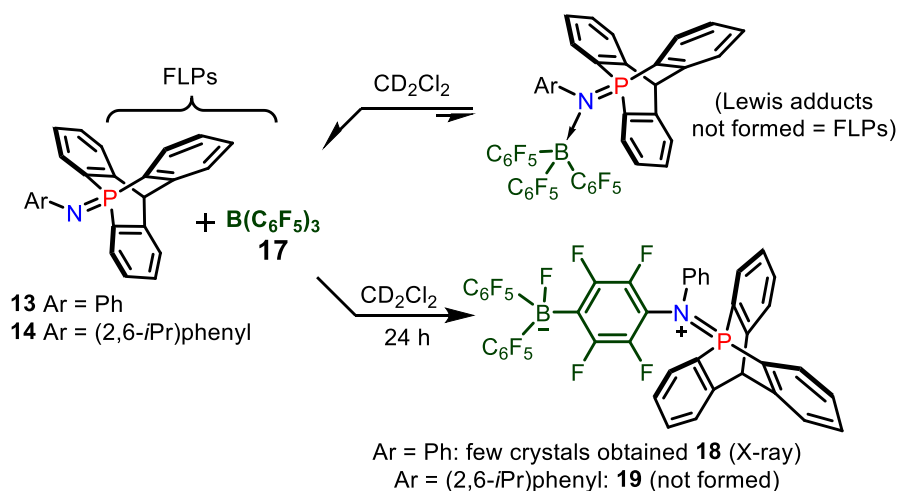

The frustrated Lewis pair consisting in the combination of **13** and **17** was prepared by the procedure described below. An NMR tube was charged with tris(pentafluorophenyl)borane (14.3 mg,  $2.8 \times 10^{-2}$  mmol), 9-phosphatriptycene imine **13** (10.2 mg,  $2.8 \times 10^{-2}$  mmol), and 0.6 mL of  $\text{CDCl}_3$  inside a glove box. A slight broadening of the peaks of both components indicated the presence of an encounter complex or a frustrated Lewis pair, but the absence of shielding or deshielding or of new signals suggested that no Lewis adduct was formed under these conditions. After measurement of NMR spectra, the mixture was kept inside glove box for one day, crystals of compound **18** were obtained among other decomposition products such as 9-phosphatriptycene oxide. Thus, the deactivation of the FLP occurs via  $\text{S}_{\text{N}}\text{Ar}$  reaction of the nitrogen atom of the 9-phosphatriptycene imine **13** at the para position of one  $\text{C}_6\text{F}_5$  rings of  $\text{B}(\text{C}_6\text{F}_5)_3$ , which was not observed in the case of **14** since of larger steric hindrance around its nitrogen atom which preclude such type of  $\text{S}_{\text{N}}\text{Ar}$  reaction.

#### NMR data for the FLP of **13** + **17**

**$^1\text{H}$  NMR** (500 MHz, Chloroform -*d*)  $\delta$  8.00 – 7.92 (m, 3H), 7.62 – 7.54 (m, 3H), 7.32 – 7.27 (m, 5H), 7.26 – 7.21 (m, 2H), 7.20 – 7.14 (m, 3H), 6.94 – 6.88 (m, 1H), 5.52 (s, 1H).

**$^{31}\text{P}$  NMR** (202 MHz, Chloroform -*d*)  $\delta$  -17.40.

**$^{11}\text{B}$  NMR** (160 MHz, Chloroform -*d*)  $\delta$  55.87.

**$^{19}\text{F}$  NMR** (471 MHz, Chloroform -*d*)  $\delta$  -127.62, -142.63, -159.91.

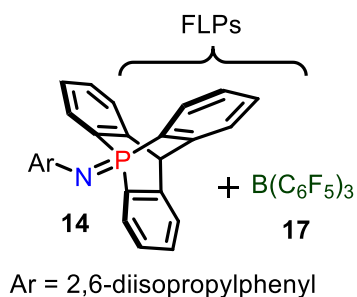

The frustrated Lewis pair between **14** + **17** was prepared by the procedure described below. An NMR tube was charged with tris(pentafluorophenyl)borane **17** (14.3 mg,  $2.8 \times 10^{-2}$  mmol), 9-phosphatriptycene imine **14** (12.52 mg,  $2.8 \times 10^{-2}$  mmol), and 0.6 mL of  $\text{CD}_2\text{Cl}_2$  inside a glove box. The shifts in heteroatom NMR suggested the possible formation of frustrated Lewis pair. Crystal suitable for X-ray analysis were obtained by evaporation of the solvent inside the glove box.

NMR data for the FLP of **14** + **17**

**$^1\text{H}$  NMR** (400 MHz, Methylene Chloride- $d_2$ )  $\delta$  7.85 (dd,  $J = 11.8, 7.4$  Hz, 3H), 7.63 – 7.55 (m, 3H), 7.32 (t,  $J = 7.5$  Hz, 3H), 7.26 – 7.15 (m, 5H), 7.08 (q,  $J = 9.9, 6.7$  Hz, 1H), 5.52 (s, 1H), 3.83 (hept,  $J = 6.8$  Hz, 2H), 1.19 (d,  $J = 6.8$  Hz, 12H).

**$^{13}\text{C}$  NMR** (126 MHz, Methylene Chloride- $d_2$ )  $\delta$  148.16 (d,  $J = 7.1$  Hz), 144.13 (d,  $J = 6.4$  Hz), 133.52 (d,  $J = 94.0$  Hz), 130.85 (d,  $J = 1.6$  Hz), 129.28 (d,  $J = 5.0$  Hz), 127.35, 126.75 (d,  $J = 11.6$  Hz), 126.41 (d,  $J = 8.8$  Hz), 123.74, 122.69, 54.68 (d,  $J = 18.5$  Hz), 29.44, 24.18.

**$^{31}\text{P}$  NMR** (162 MHz, Methylene Chloride- $d_2$ )  $\delta$  26.23, -27.29.

**$^{11}\text{B}$  NMR** (128 MHz, Methylene Chloride- $d_2$ )  $\delta$  57.24, -1.60.

**$^{19}\text{F}$  NMR** (376 MHz, Methylene Chloride- $d_2$ )  $\delta$  -128.06, -133.98 (dd,  $J = 23.6, 7.6$  Hz), -143.80, -157.42 (t,  $J = 20.2$  Hz), -159.52 (t,  $J = 20.0$  Hz), -160.91, -163.60 – -164.69 (m), -165.60 (t,  $J = 18.8$  Hz).



Further investigation of the FLP of **13** with the tritylium ion and subsequent S<sub>E</sub>Ar reactions the para position of N-Ph of **13** to yield compound **21** (X-ray in Figure S2).

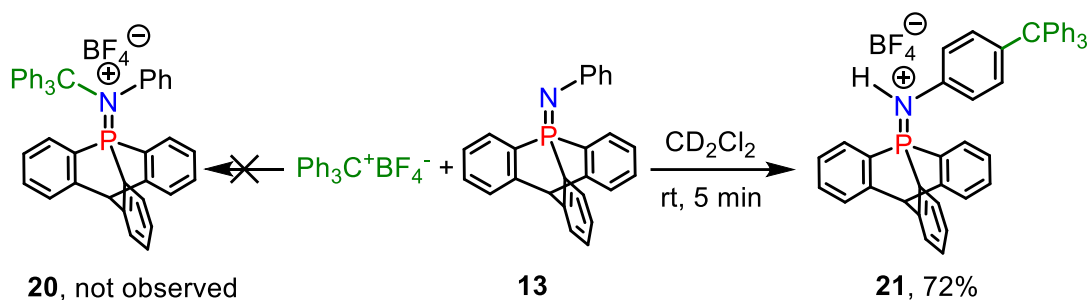

Compound **21** was prepared by the procedure described below. An NMR tube was charged with tritylium tetrafluoroborate (10.0 mg,  $3.05 \times 10^{-2}$  mmol), 9-phospatriptycene imine **13** (10.2 mg,  $2.8 \times 10^{-2}$  mmol), and 0.6 mL of CD<sub>2</sub>Cl<sub>2</sub> inside a glove box. After measurements of the NMR spectra, the solvent was slowly evaporated inside glove box to get the crystals suitable for X-ray analysis (14.0 mg,  $2.02 \times 10^{-2}$  mmol, 72%).

**<sup>1</sup>H NMR** (500 MHz, Methylene Chloride-*d*<sub>2</sub>) δ 8.70 (d, *J* = 2.6 Hz, 1H), 7.94 (ddd, *J* = 13.4, 7.3, 2.5 Hz, 3H), 7.76 (dq, *J* = 7.8, 3.2, 2.2 Hz, 3H), 7.51 – 7.43 (m, 4H), 7.39 (dd, *J* = 8.8, 2.3 Hz, 2H), 7.31 (d, *J* = 8.8 Hz, 4H), 7.30 – 7.28 (m, 4H), 7.28 – 7.25 (m, 8H), 7.25 – 7.21 (m, 5H), 5.86 (s, 1H).

**<sup>13</sup>C NMR** (126 MHz, Methylene Chloride-*d*<sub>2</sub>) δ 146.96 (d, *J* = 7.6 Hz), 146.55, 132.67 (d, *J* = 29.3 Hz), 131.03, 130.16, 129.47 (d, *J* = 5.4 Hz), 127.90 (d, *J* = 7.1 Hz), 127.68, 127.19 (dd, *J* = 13.1, 3.2 Hz), 126.88 (dd, *J* = 9.9, 4.0 Hz), 126.15, 120.00 (d, *J* = 8.3 Hz), 119.41 (d, *J* = 7.7 Hz), 64.62, 54.67 (d, *J* = 21.8 Hz).

**<sup>31</sup>P NMR** (202 MHz, Methylene Chloride-*d*<sub>2</sub>) δ 9.41.

**<sup>11</sup>B NMR** (160 MHz, Methylene Chloride-*d*<sub>2</sub>) δ -1.76.

**<sup>19</sup>F NMR** (471 MHz, Methylene Chloride-*d*<sub>2</sub>) δ -148.66.

**IR** (neat, ATR):  $\tilde{\nu}$  / cm<sup>-1</sup> = 3220, 1609, 1588, 1511, 1493, 1444, 1271, 1228, 1110, 1067, 989, 855, 827, 769, 759, 705, 630, 610, 549, 522.

**HRMS (ESI<sup>+</sup>)**: Calcd. for C<sub>44</sub>H<sub>33</sub>NP<sup>+</sup> [M]<sup>+</sup>: 606.2346, found: 606.2395.

**M.p.**: 309-311 °C (dec)

#### 4. Copies of all NMR spectra

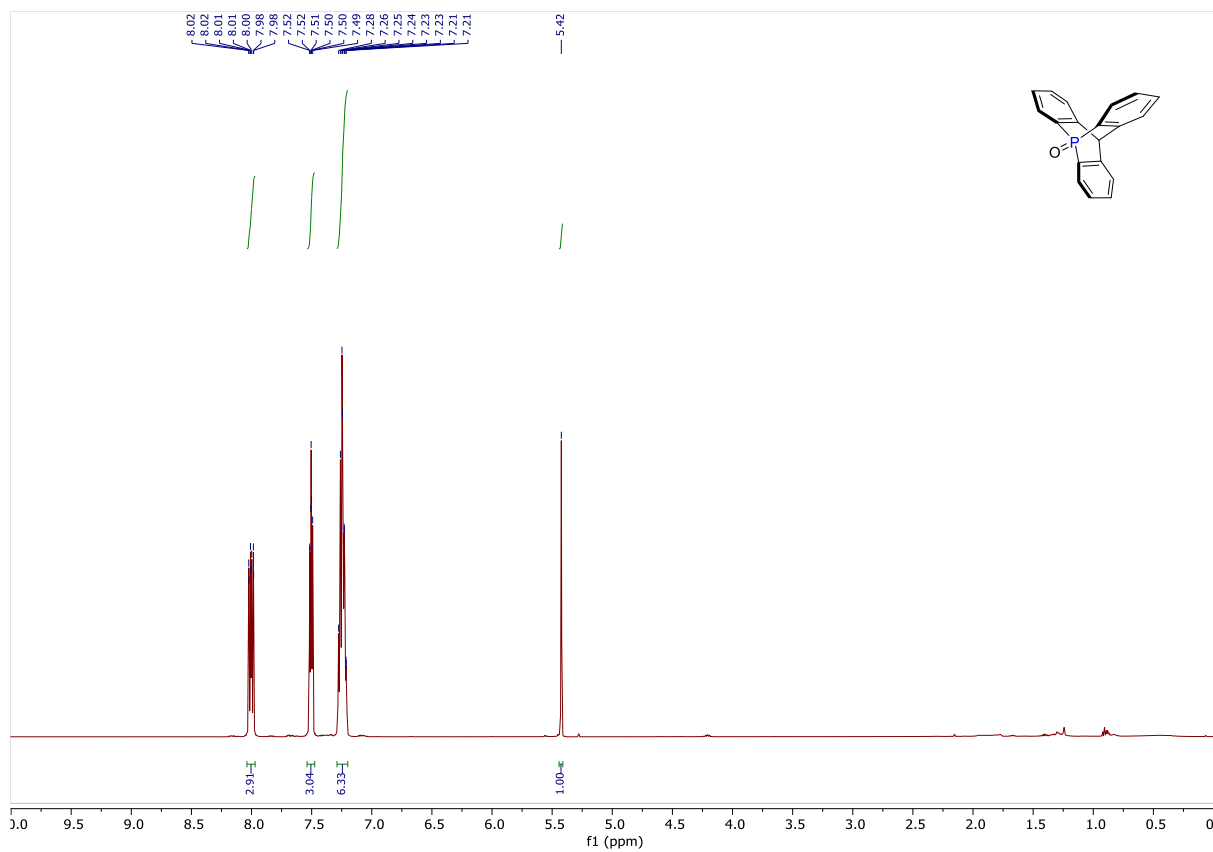

$^1\text{H}$  NMR (500 MHz, 25 °C,  $\text{CDCl}_3$ ) of **6**

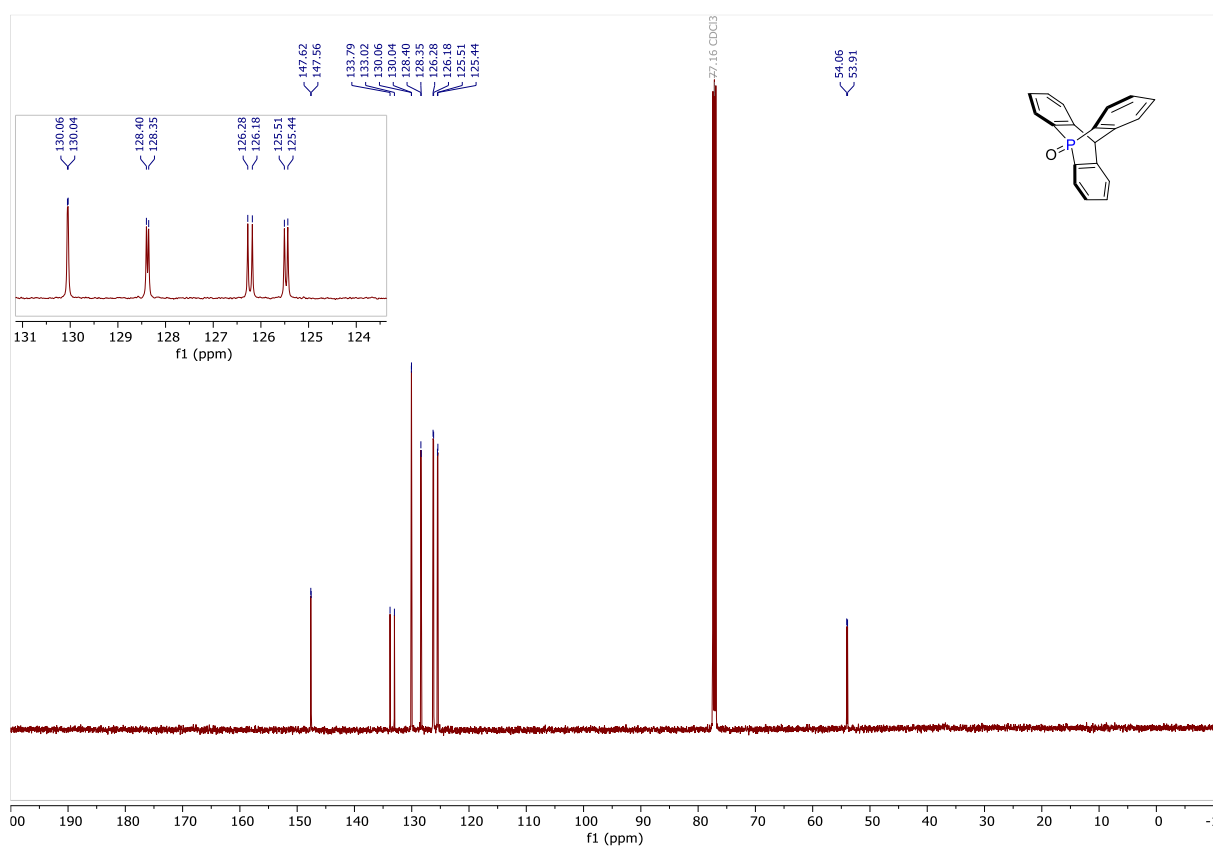

$^{13}\text{C}$  NMR (126 MHz, 25 °C,  $\text{CDCl}_3$ ) of **6**

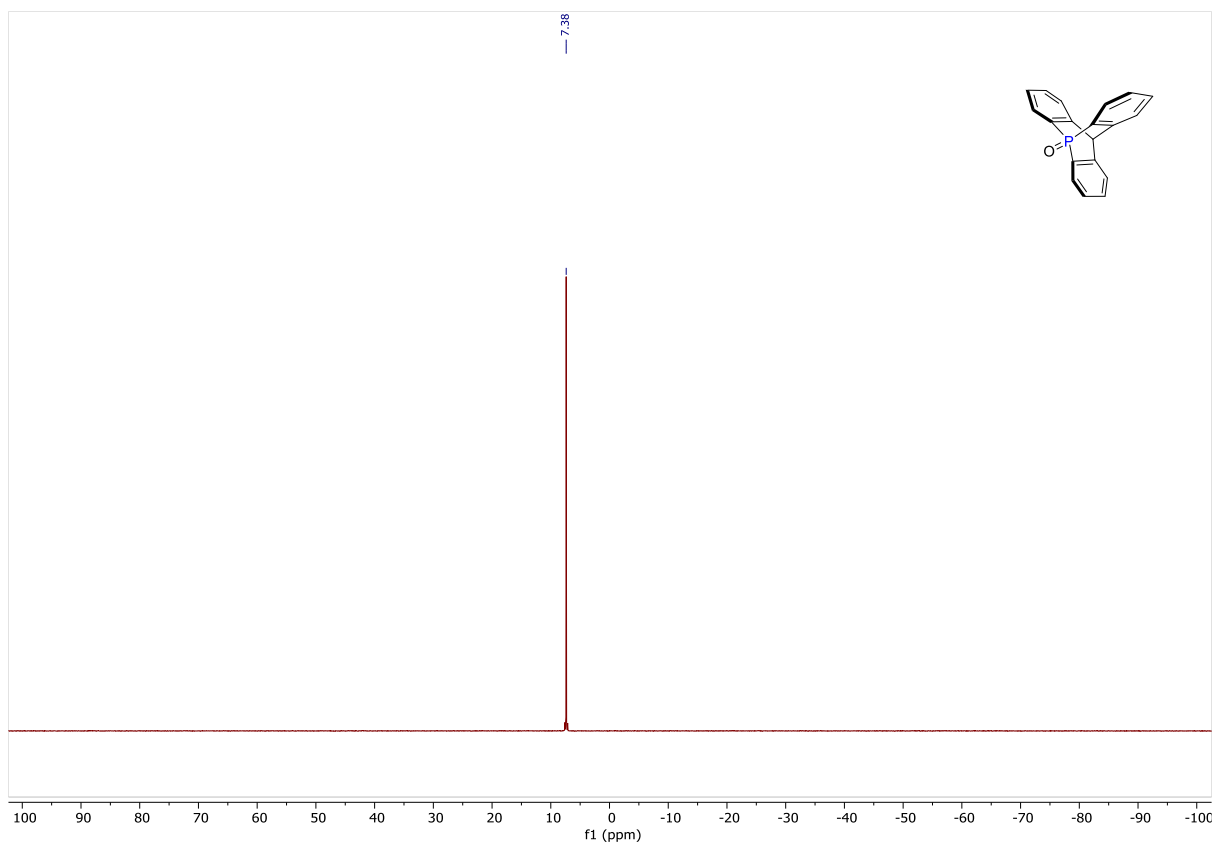

$^{31}\text{P}$  NMR (202 MHz, 25 °C,  $\text{CDCl}_3$ ) of 6

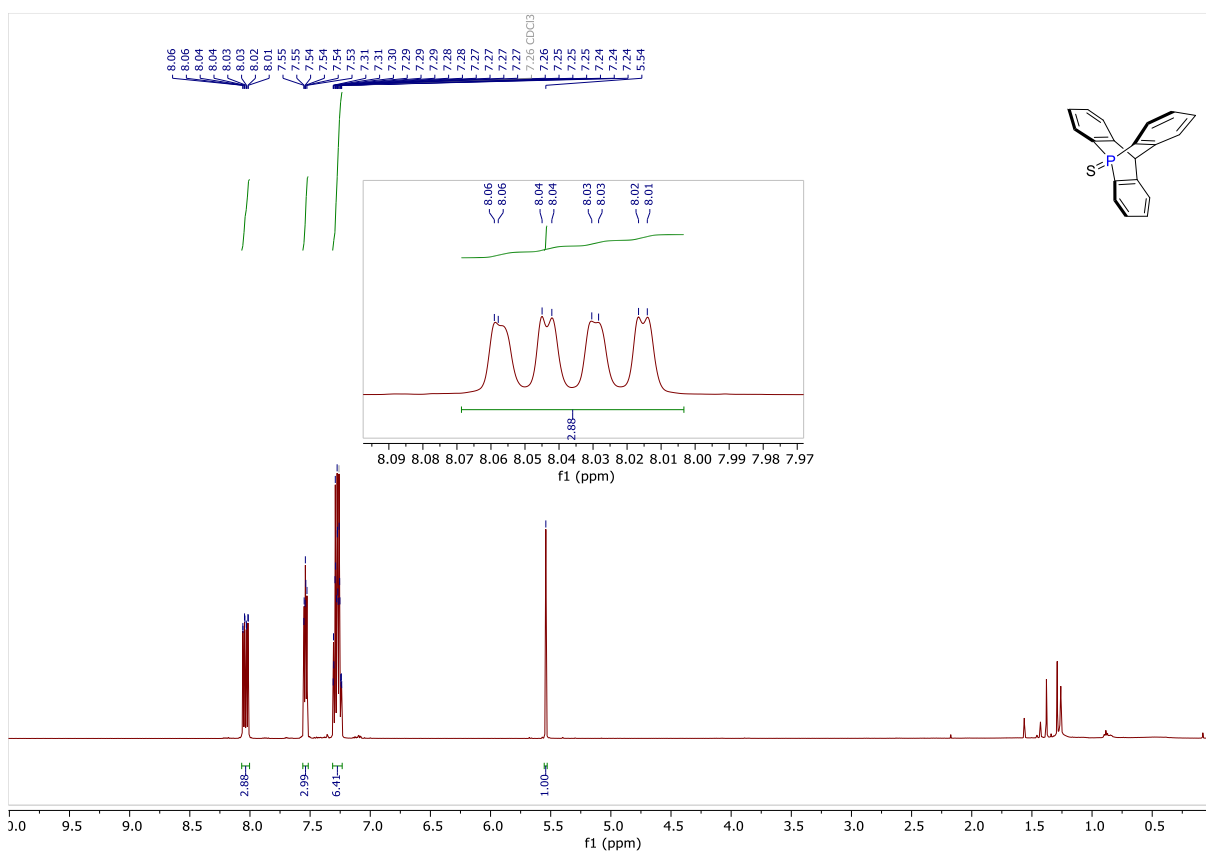

$^1\text{H}$  NMR (500 MHz, 25 °C,  $\text{CDCl}_3$ ) of 7

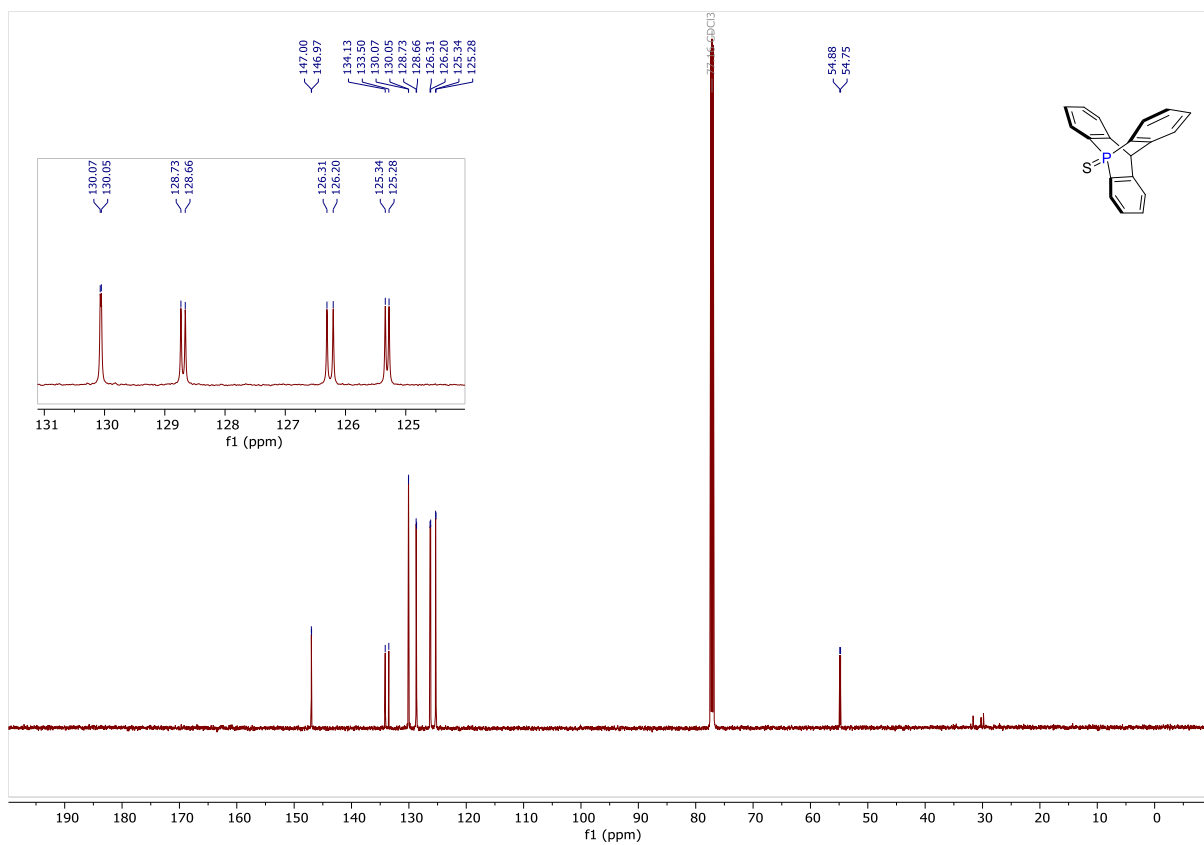

$^{13}\text{C}$  NMR (126 MHz, 25 °C,  $\text{CDCl}_3$ ) of 7

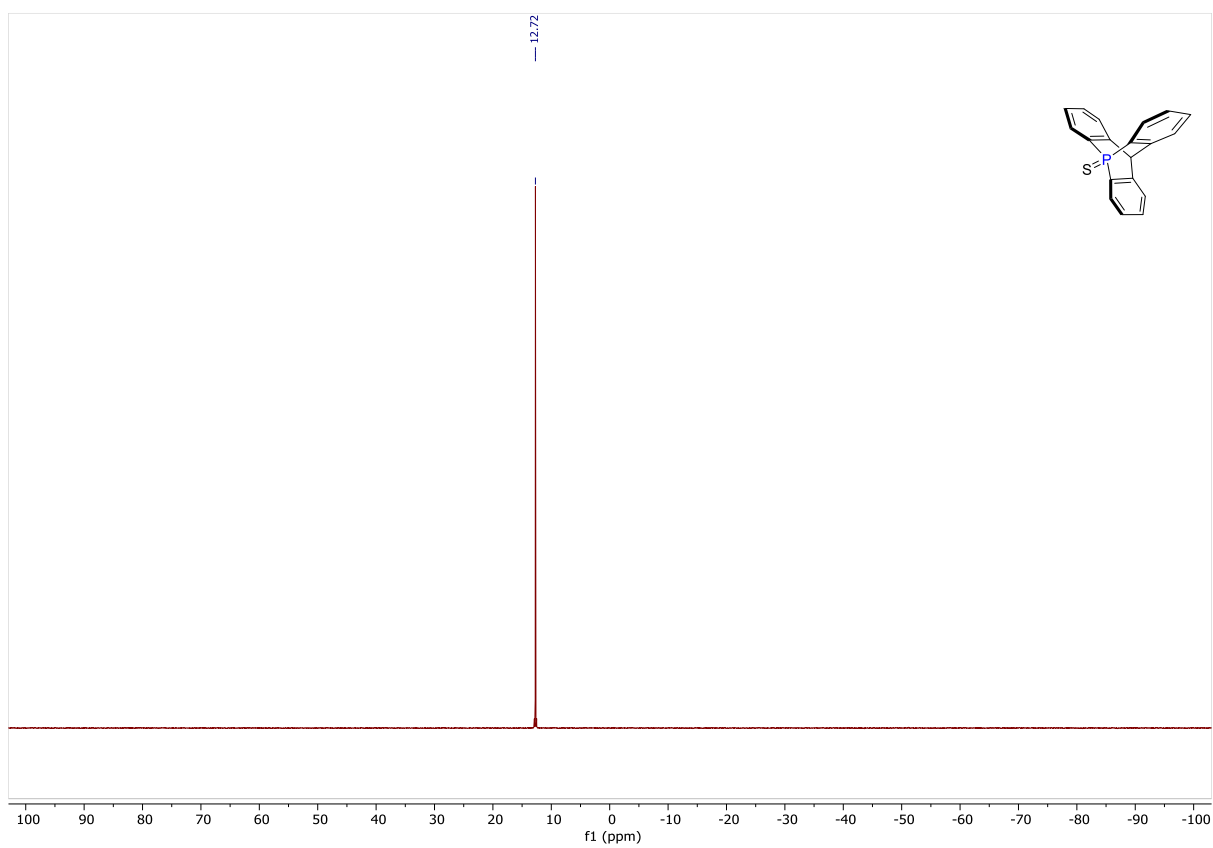

$^{31}\text{P}$  NMR (202 MHz, 25 °C,  $\text{CDCl}_3$ ) of 7

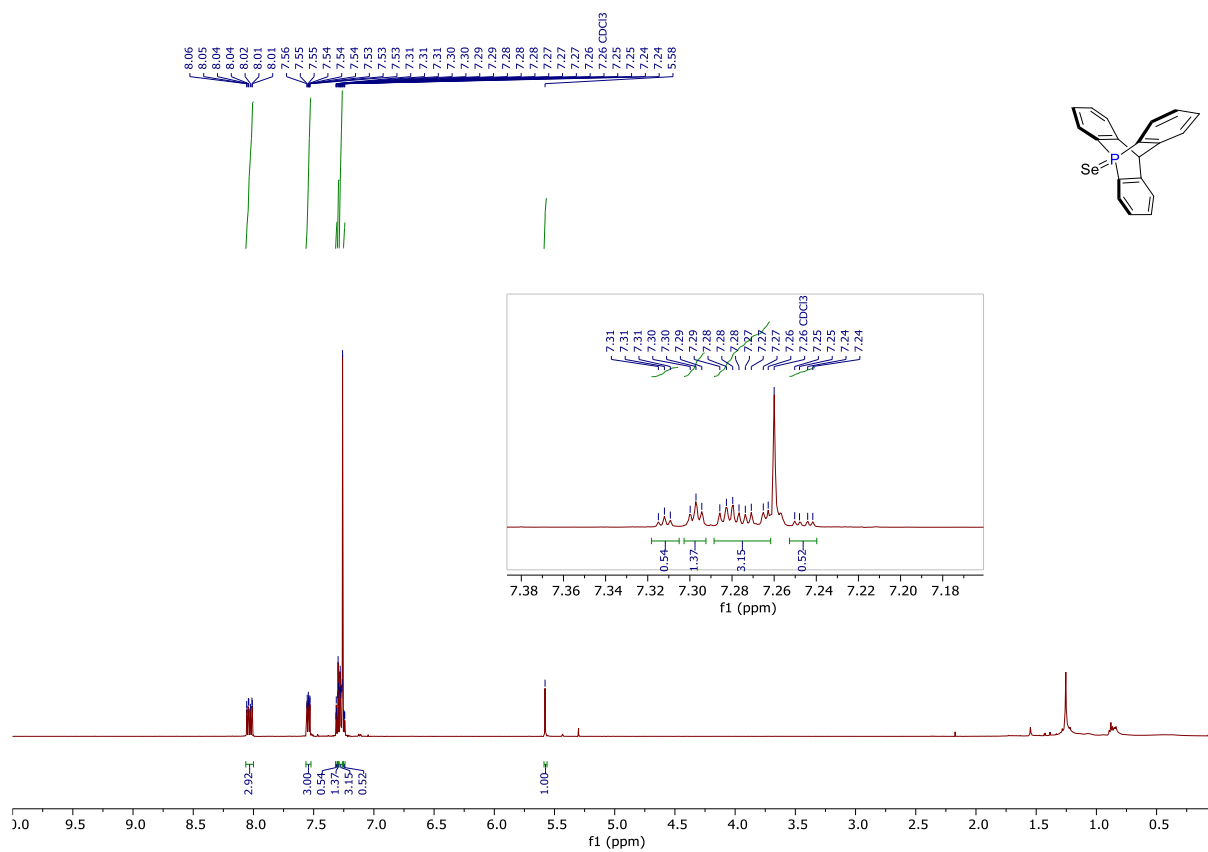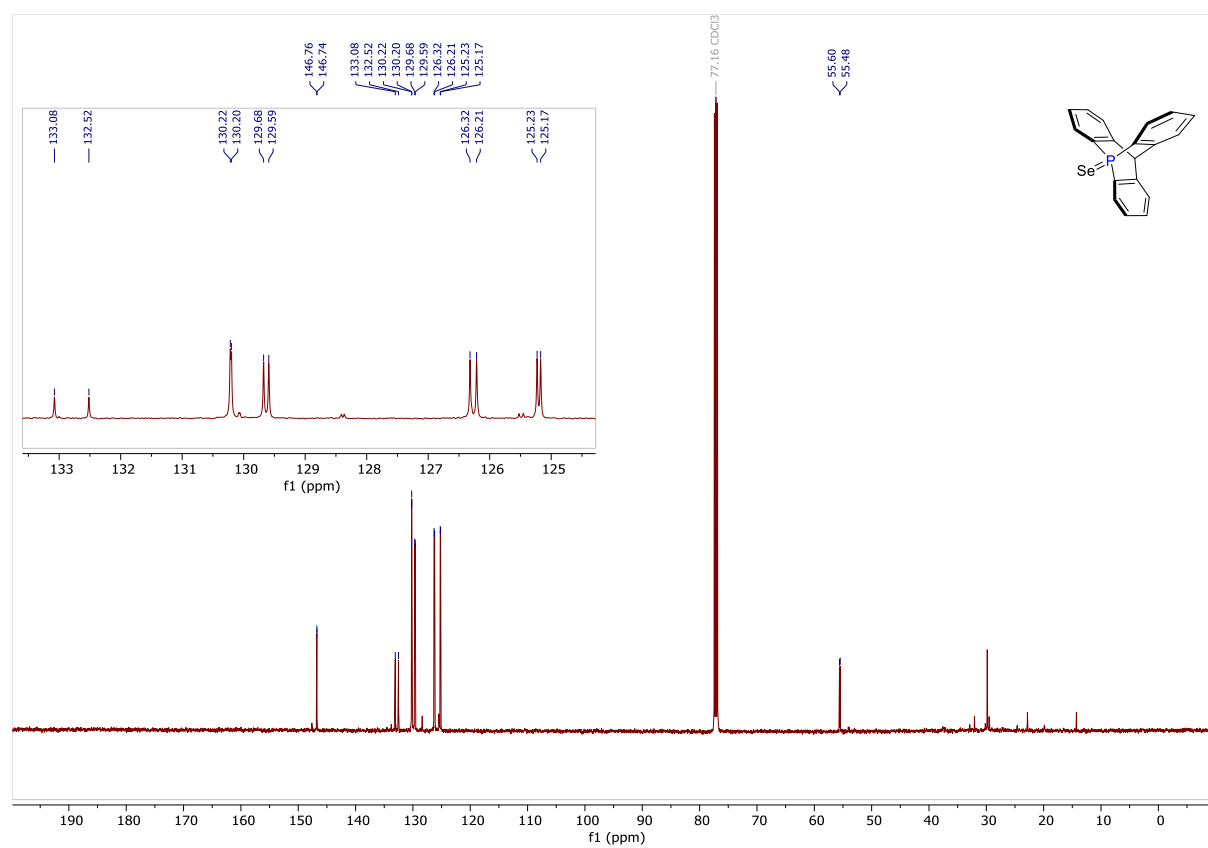

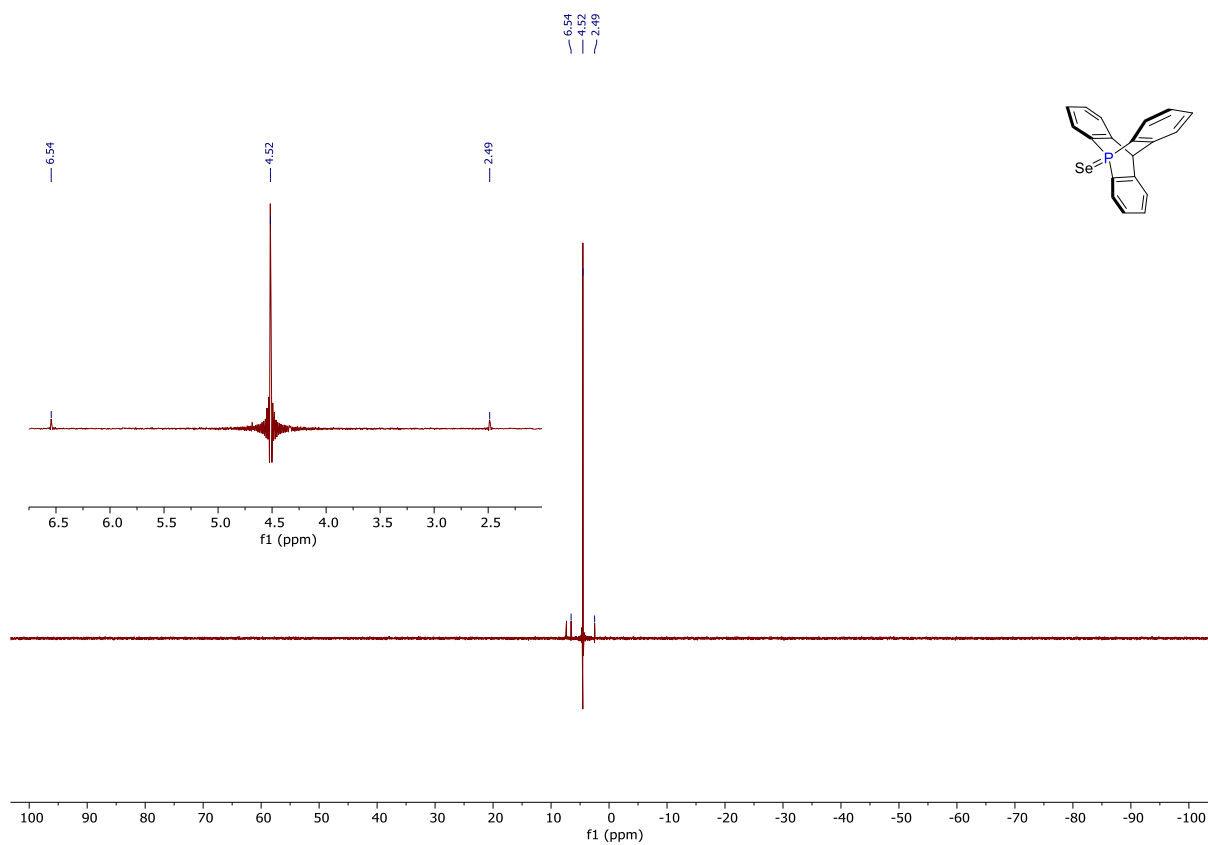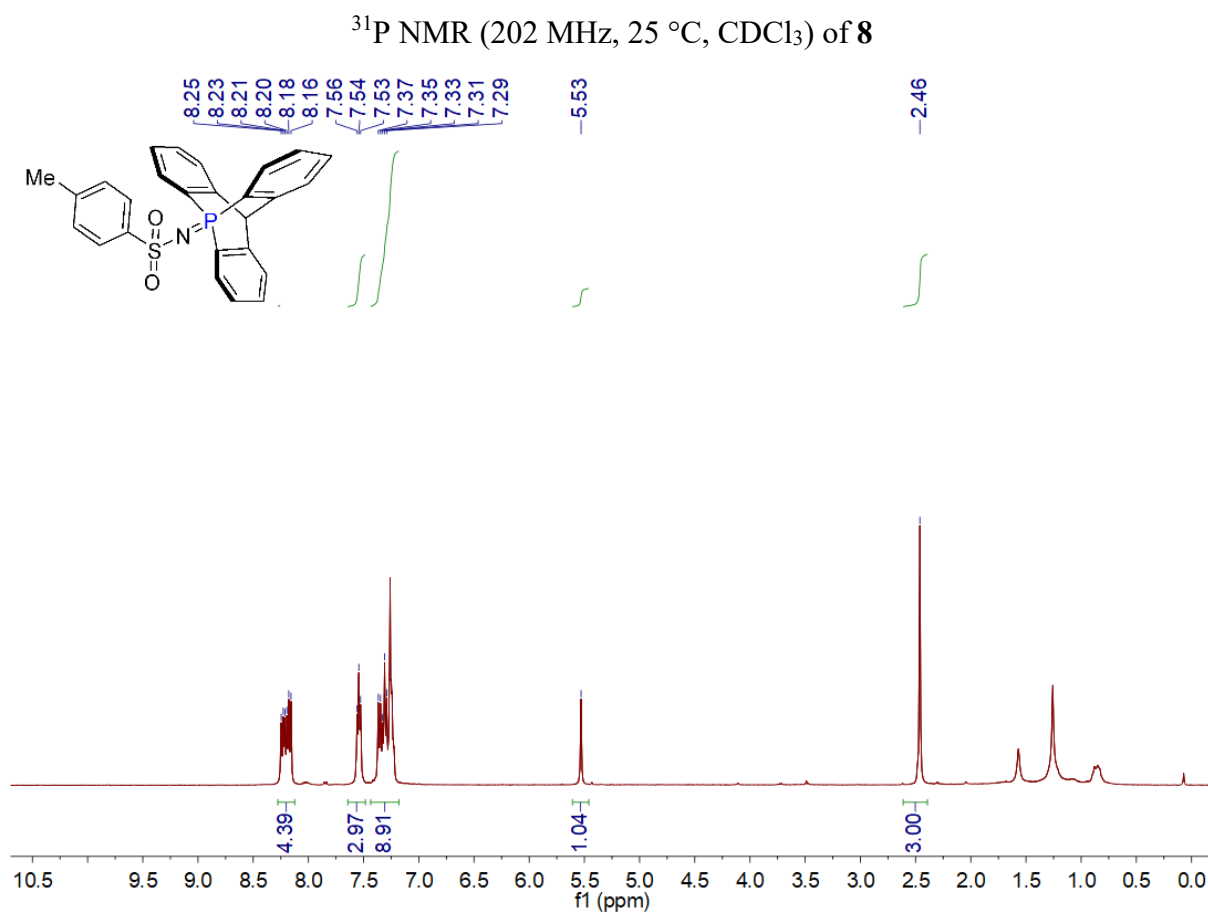

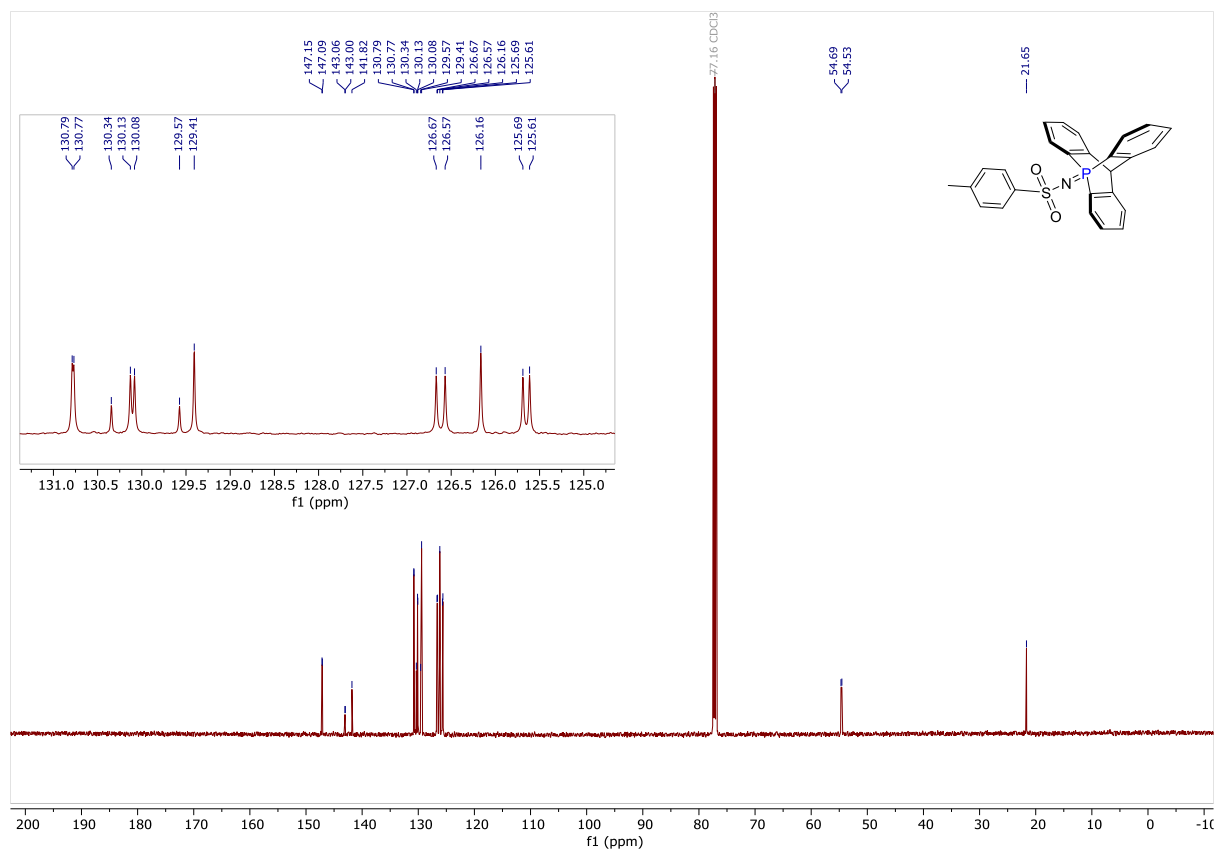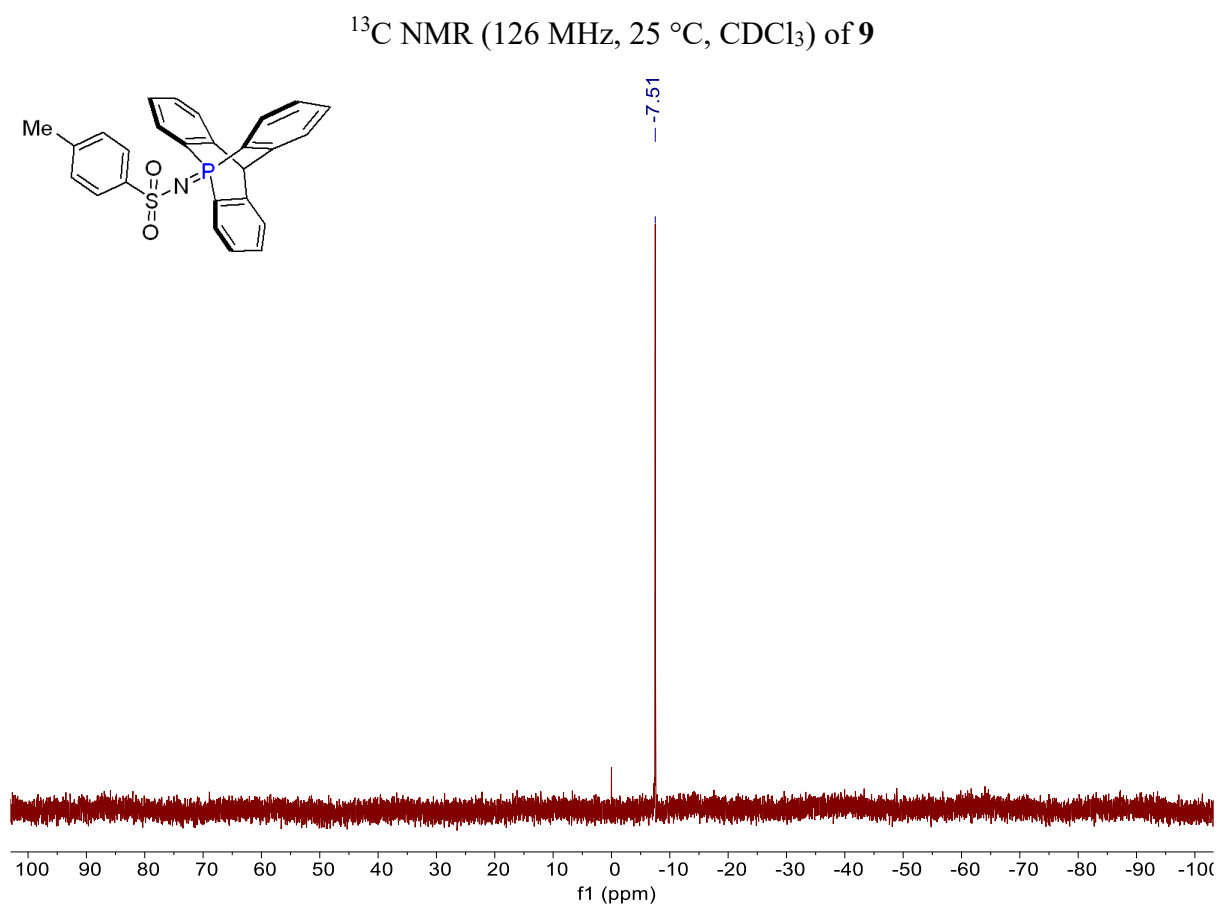

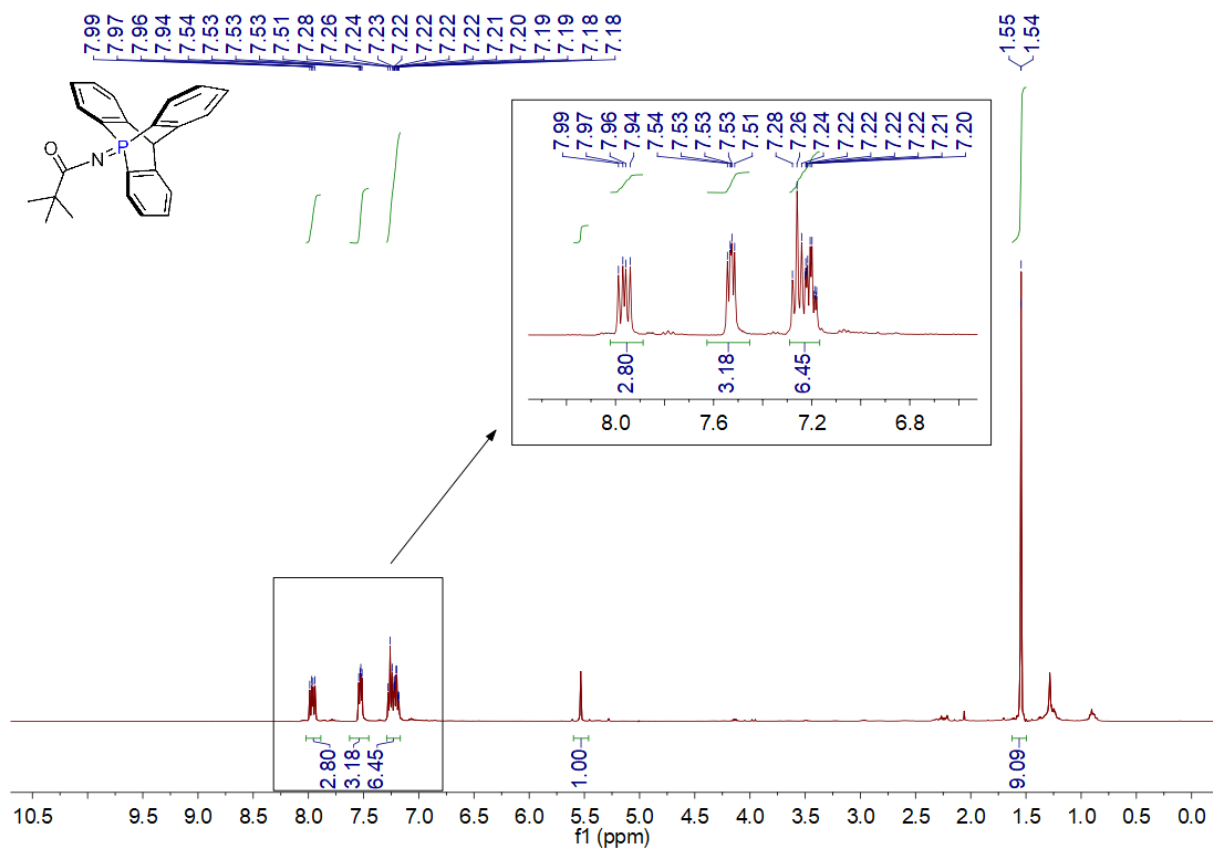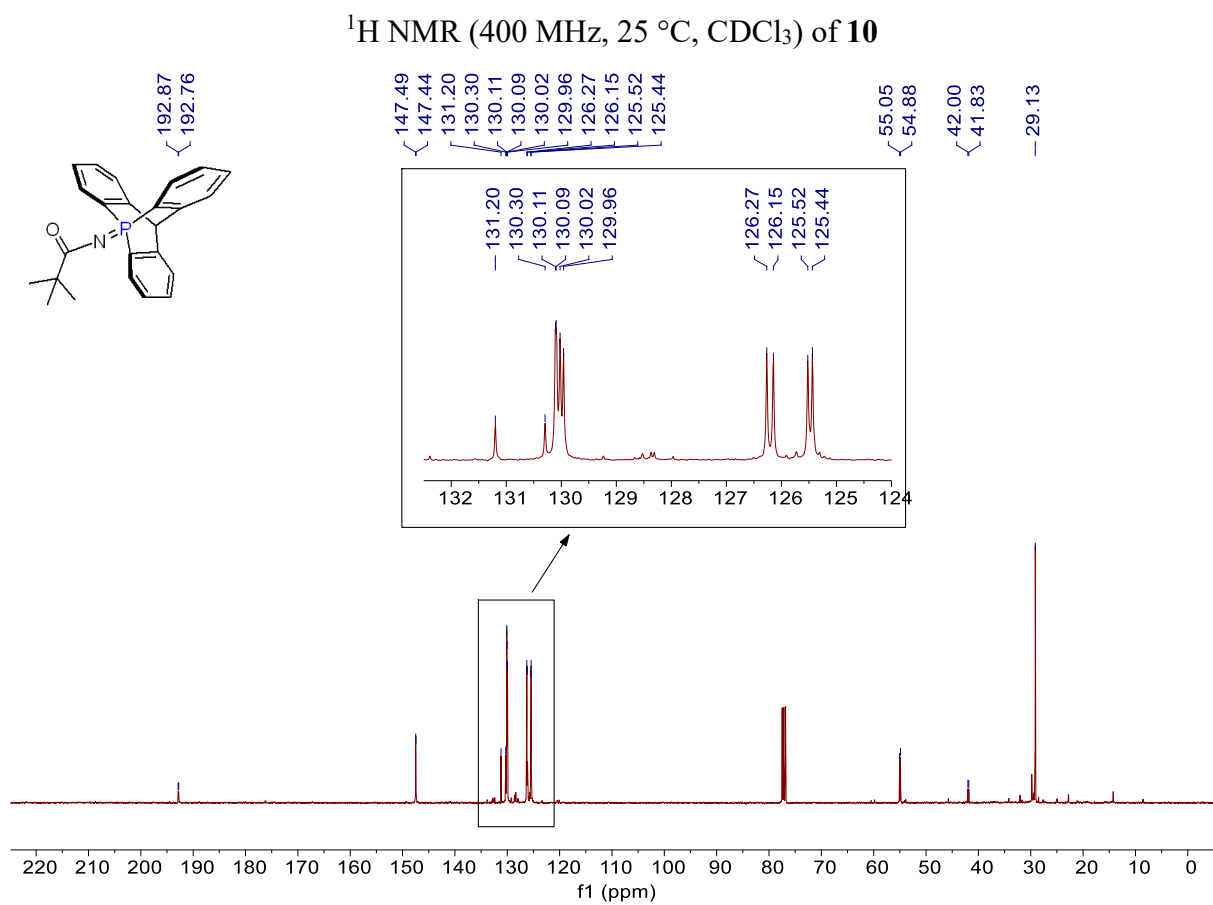



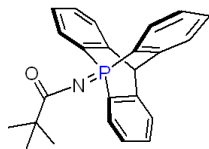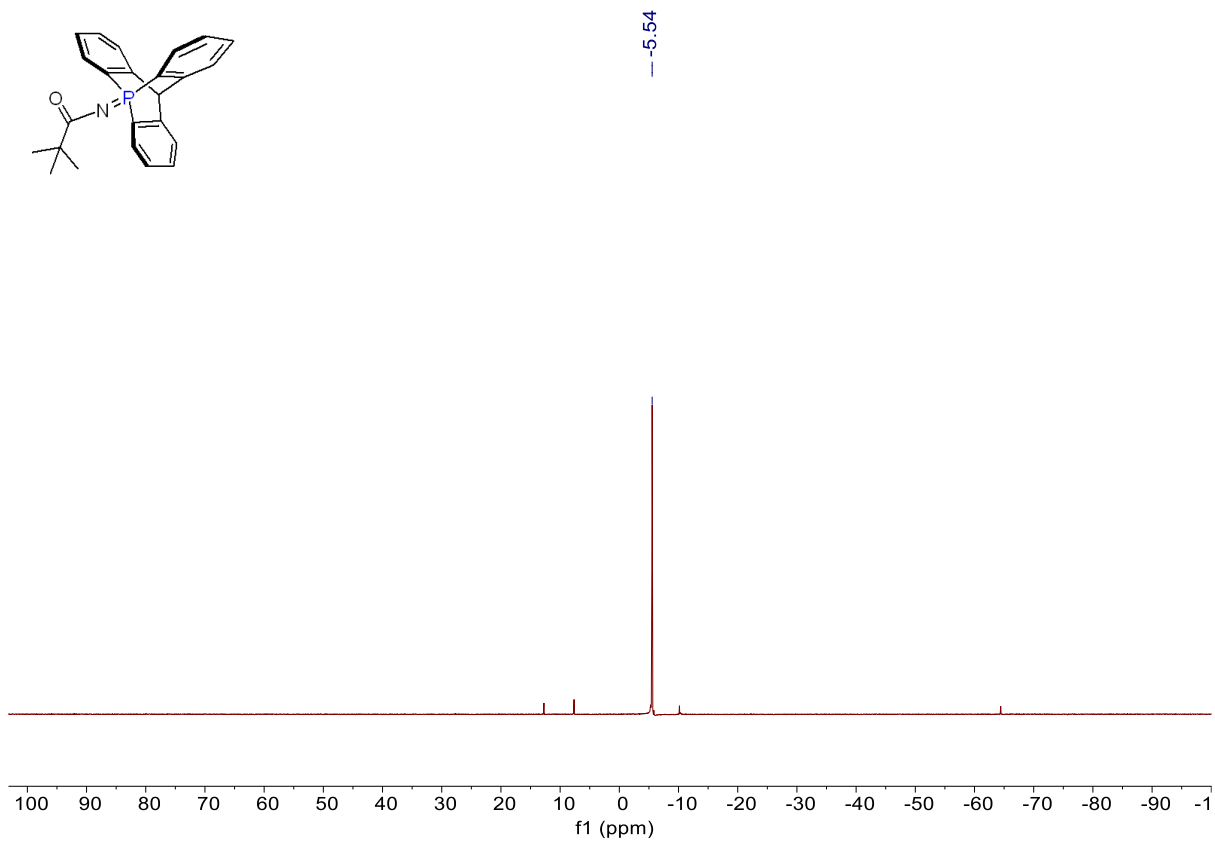

$^{31}\text{P}$  NMR (161 MHz, 25 °C,  $\text{CDCl}_3$ ) of **10**

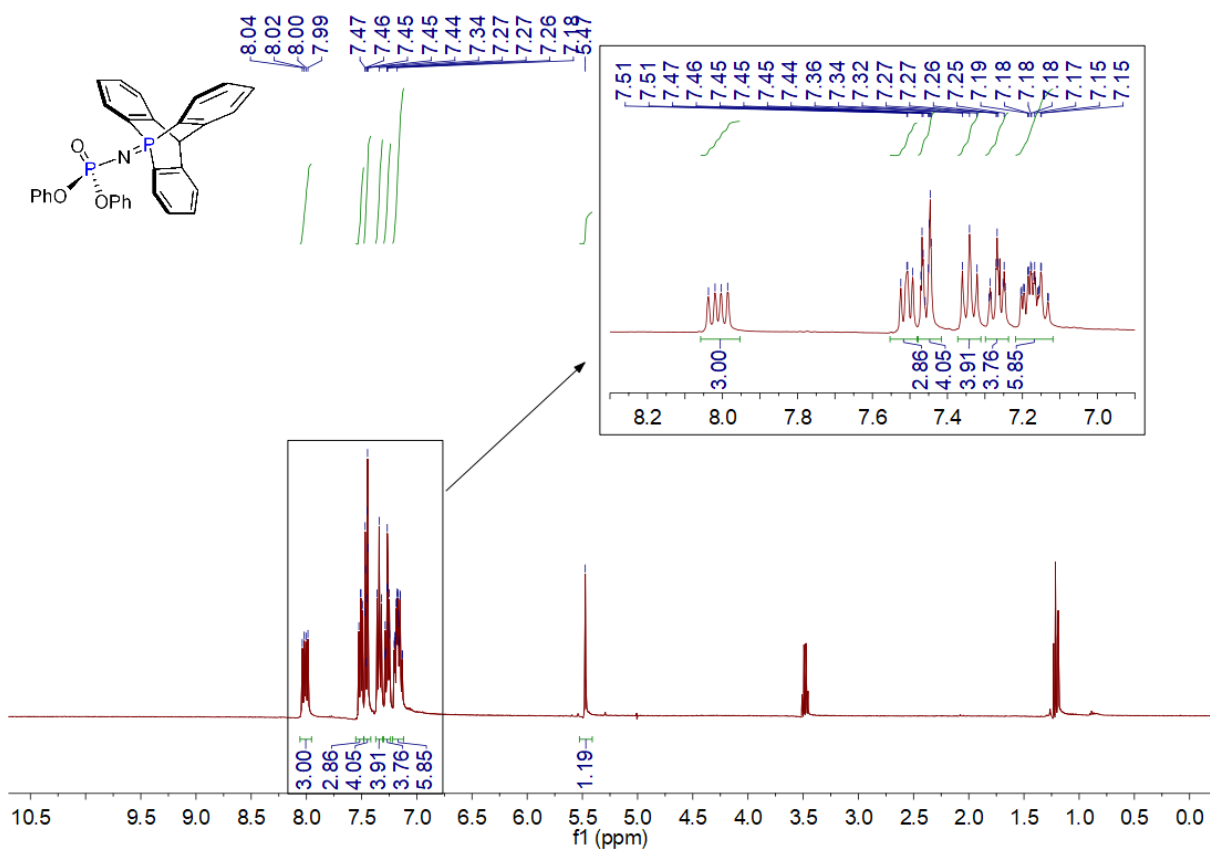

$^1\text{H}$  NMR (400 MHz, 25 °C,  $\text{CDCl}_3$ ) of **11**

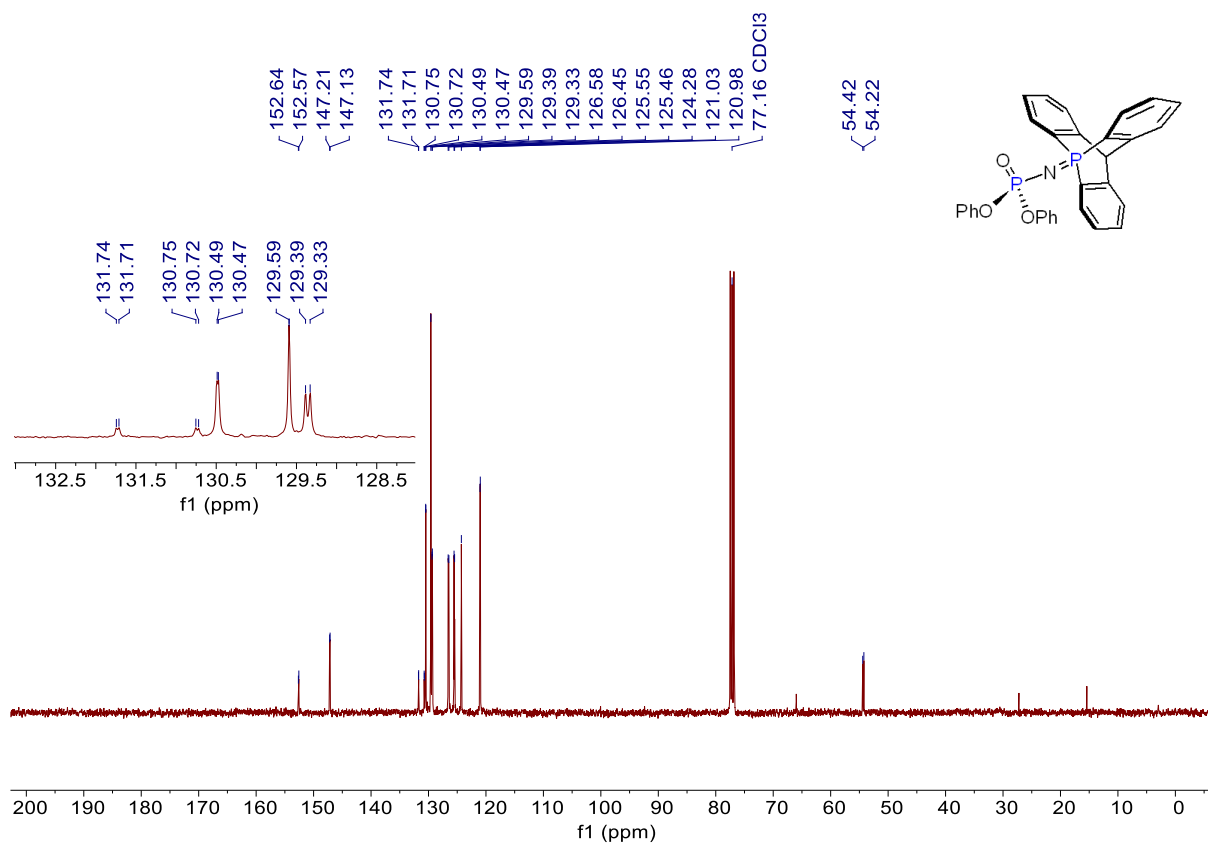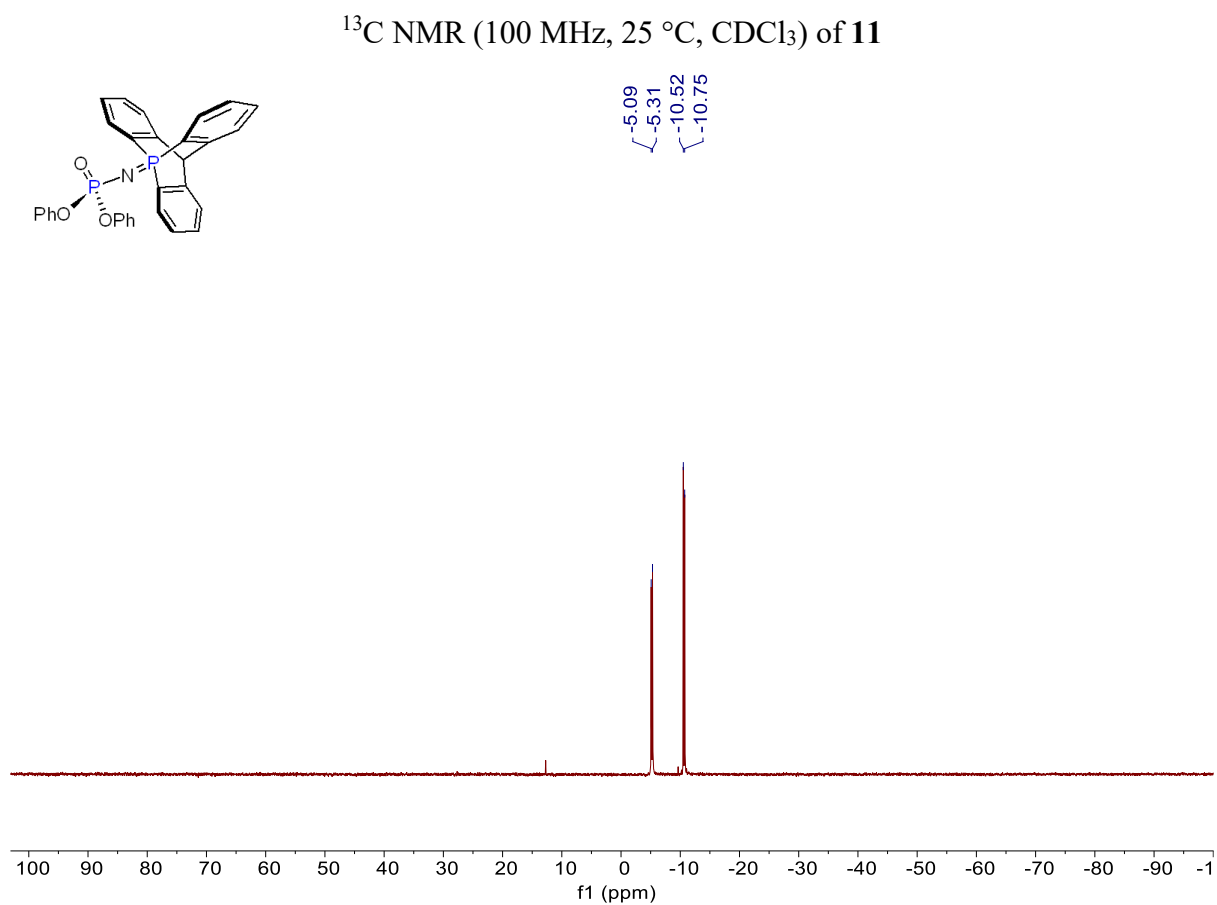

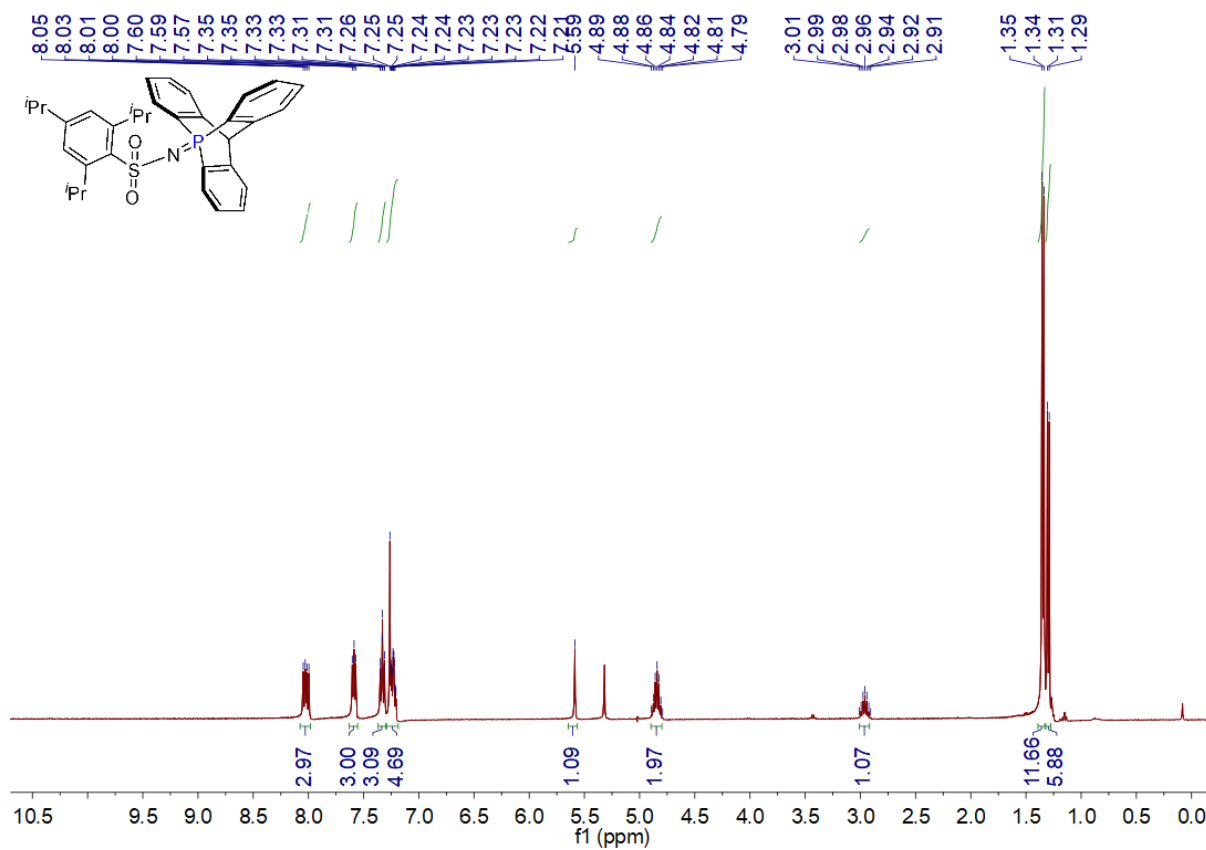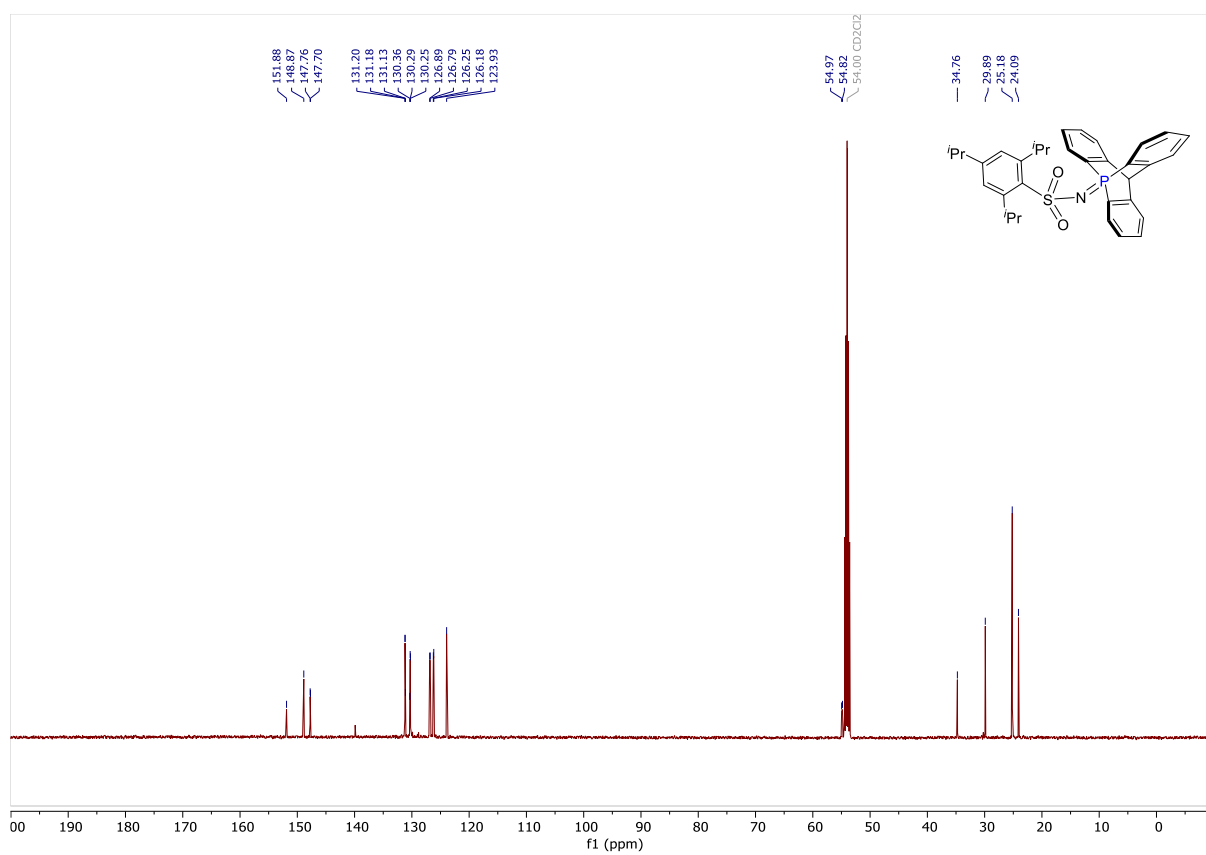

$^{13}\text{C NMR}$  (126 MHz, 25 °C,  $\text{CD}_2\text{Cl}_2$ ) of **12**

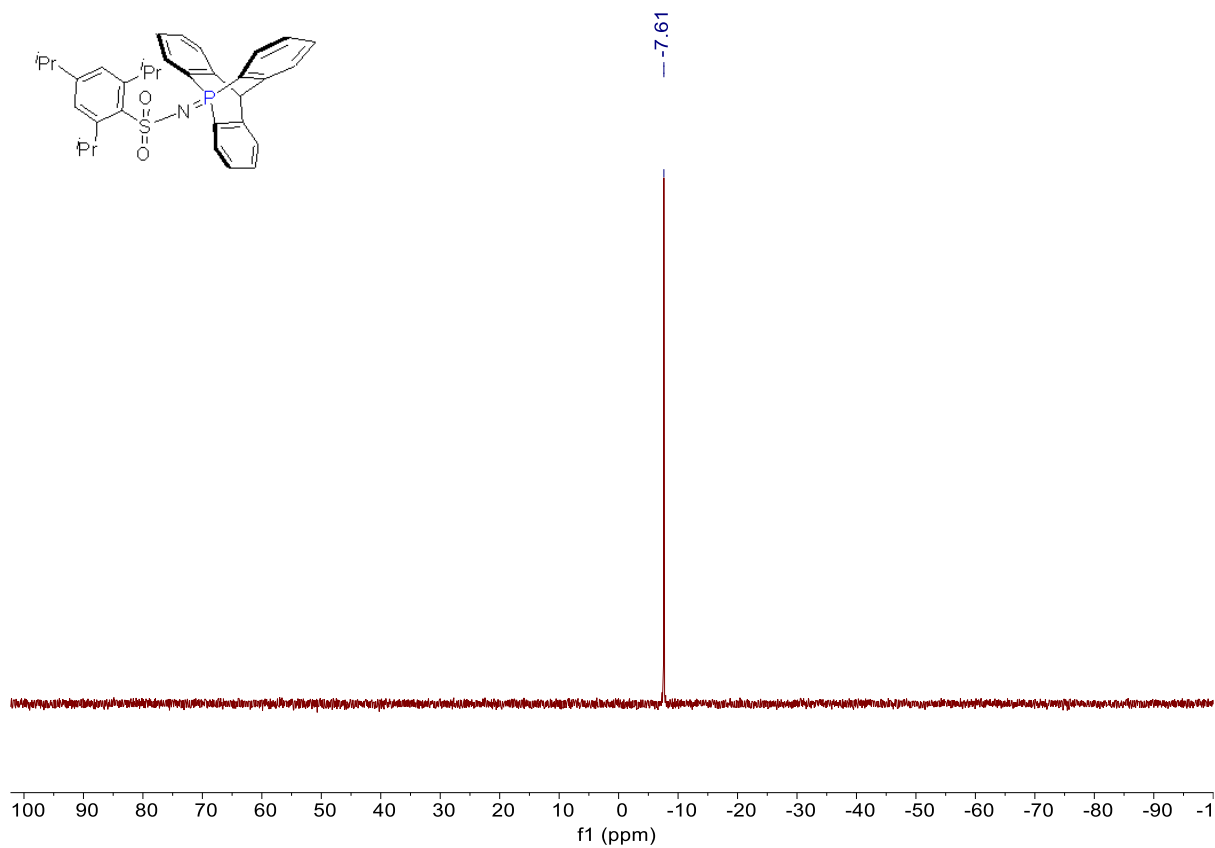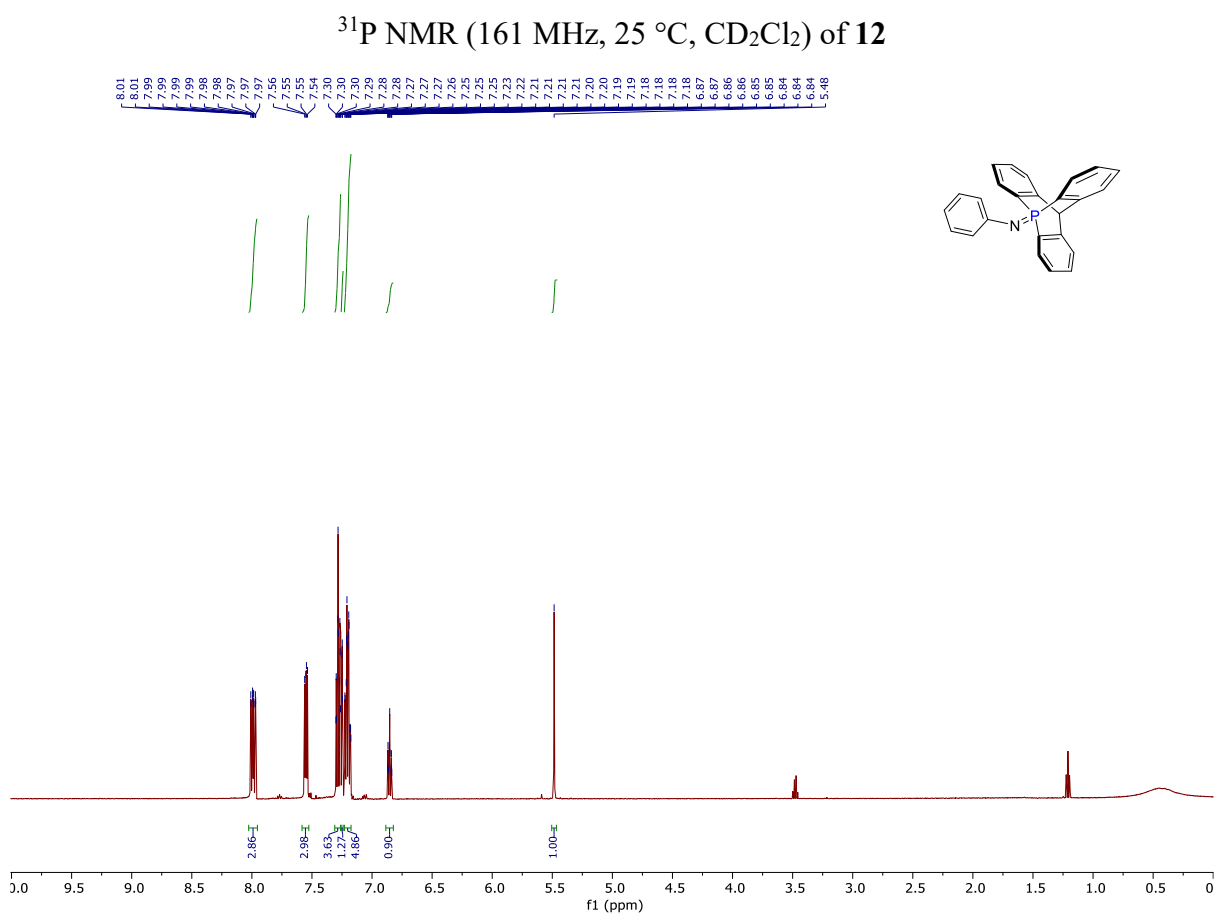

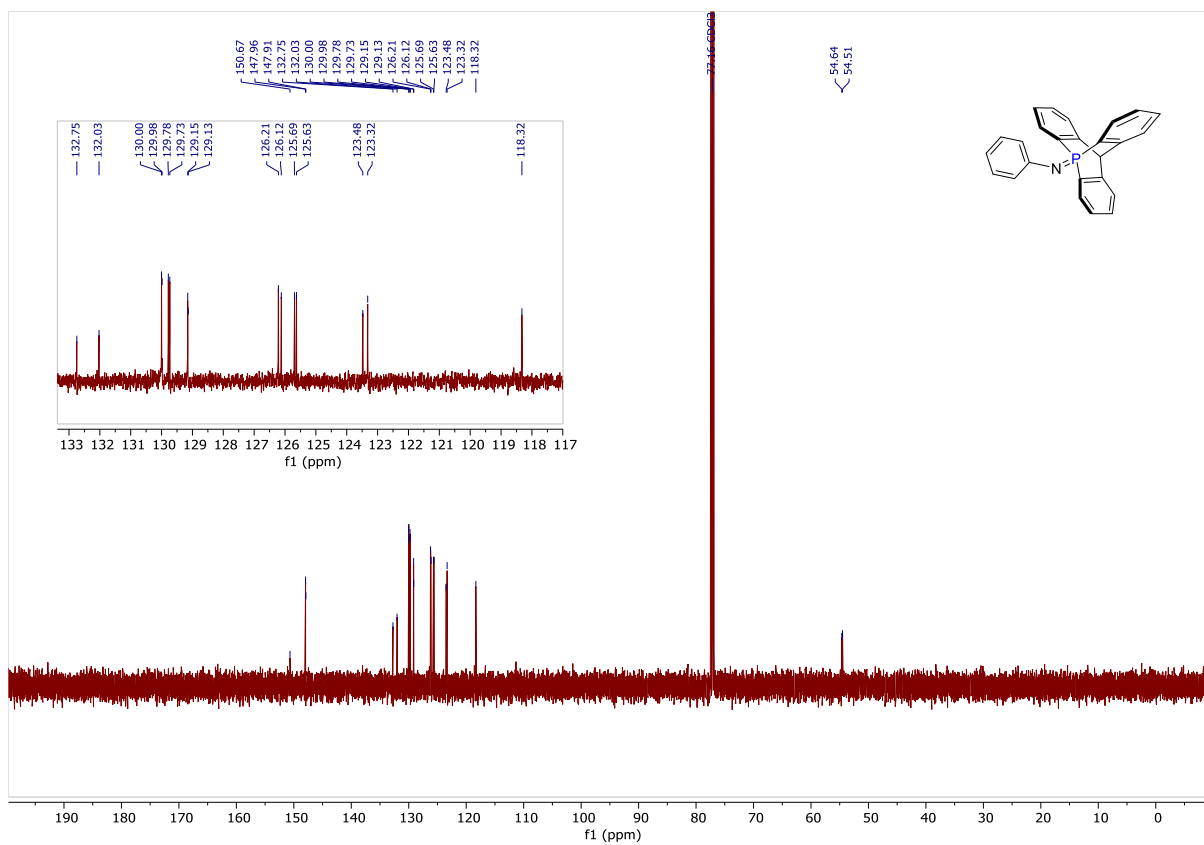

**<sup>13</sup>C NMR (126 MHz, 25 °C, CDCl<sub>3</sub>) of 13**

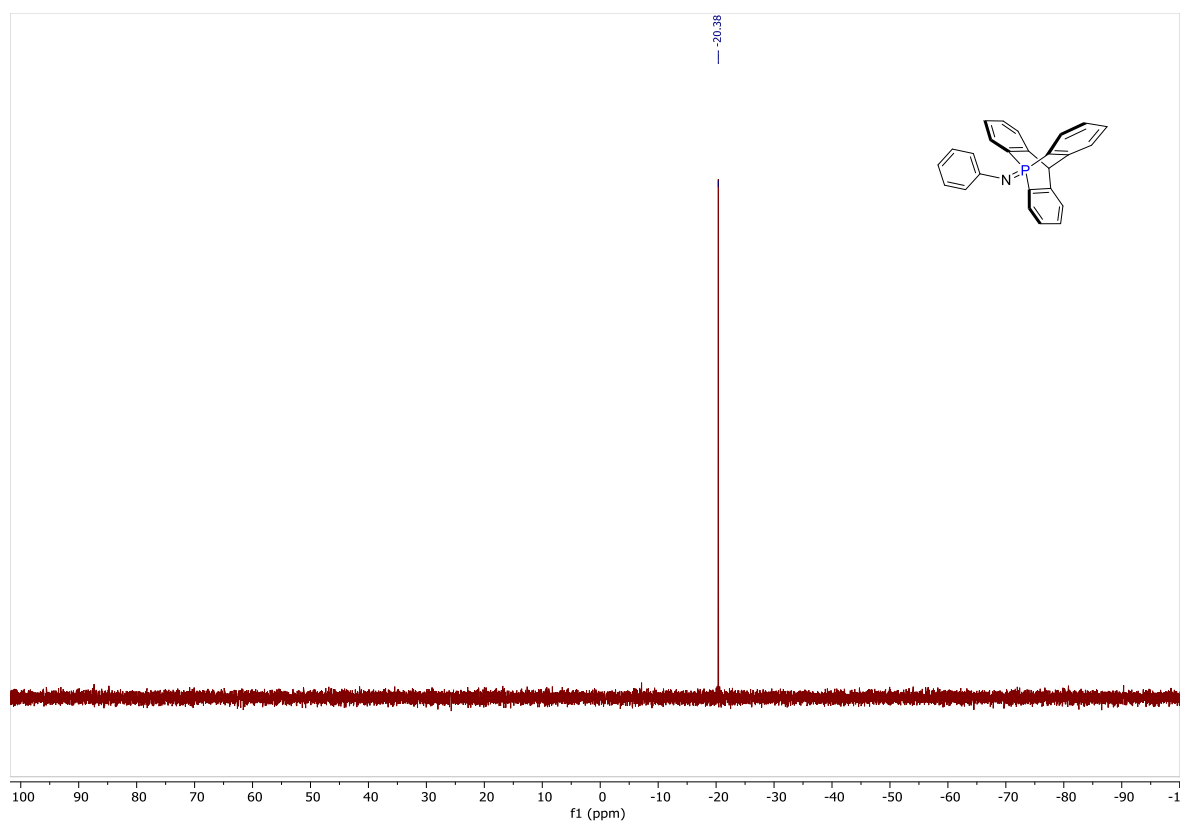

**<sup>31</sup>P NMR (202 MHz, 25 °C, CDCl<sub>3</sub>) of 13**

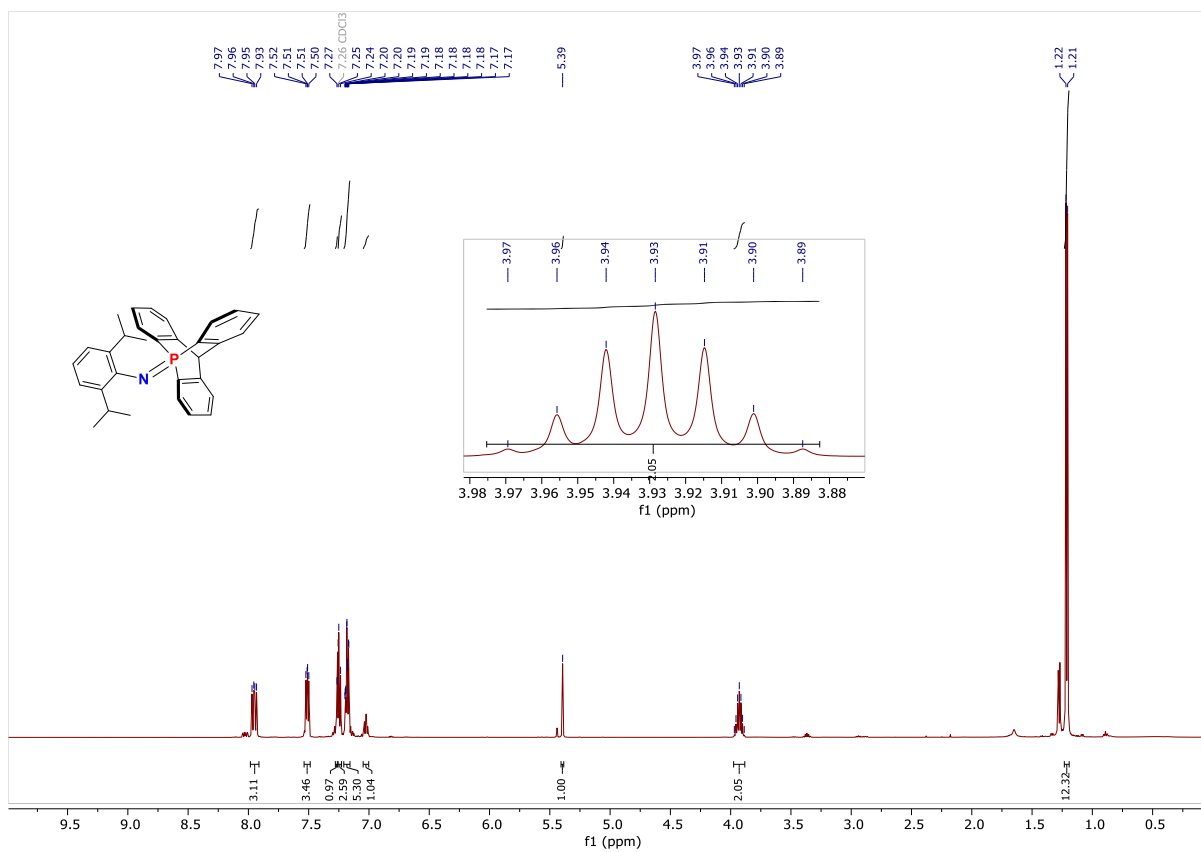

**<sup>1</sup>H NMR (500 MHz, 25 °C, CDCl<sub>3</sub>) of 14**

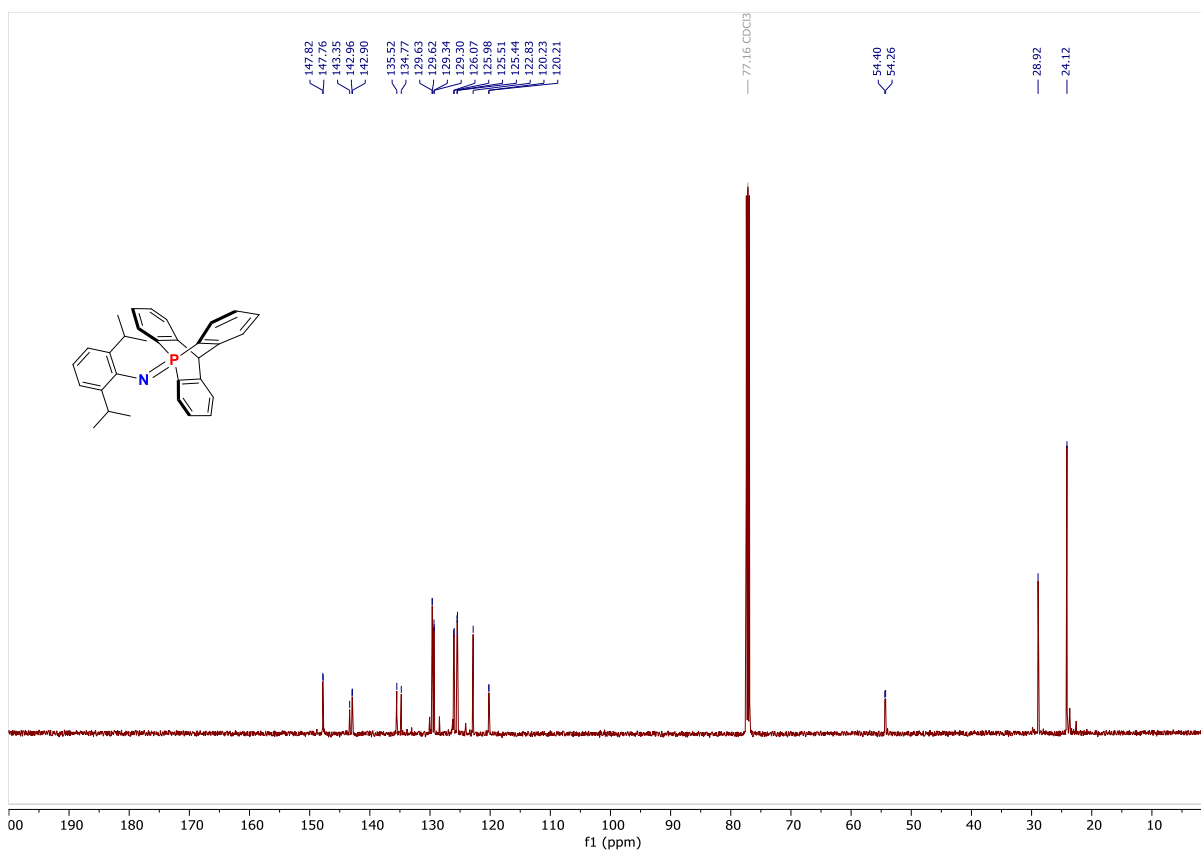

**<sup>13</sup>C NMR (126 MHz, 25 °C, CDCl<sub>3</sub>) of 14**

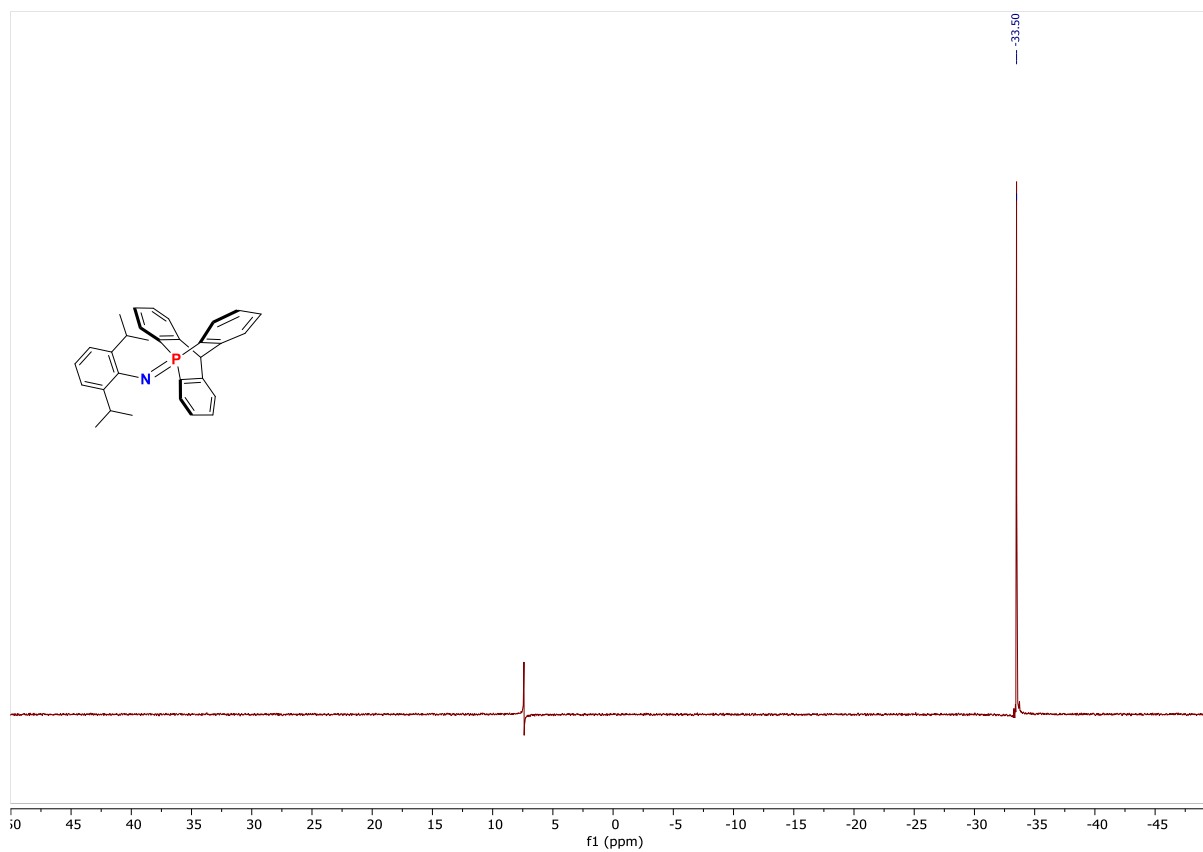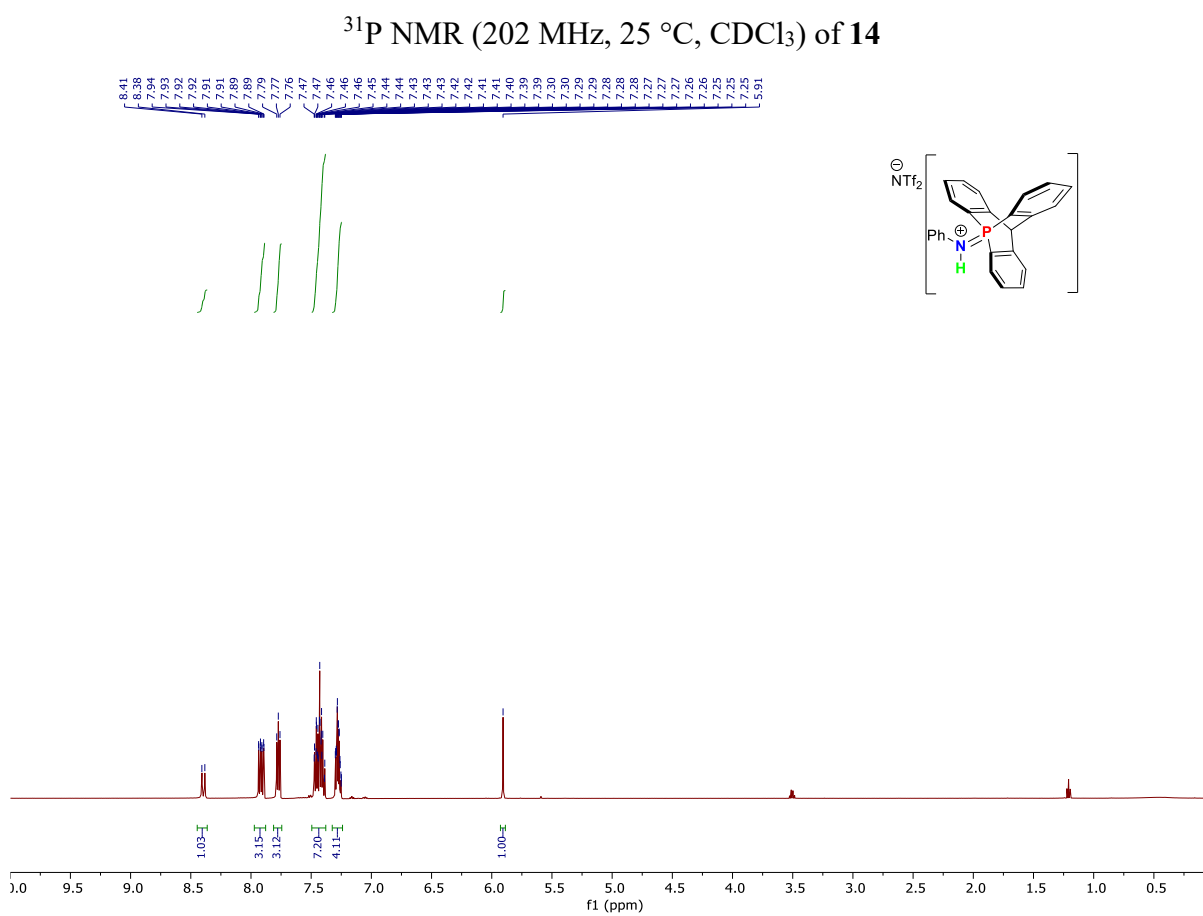

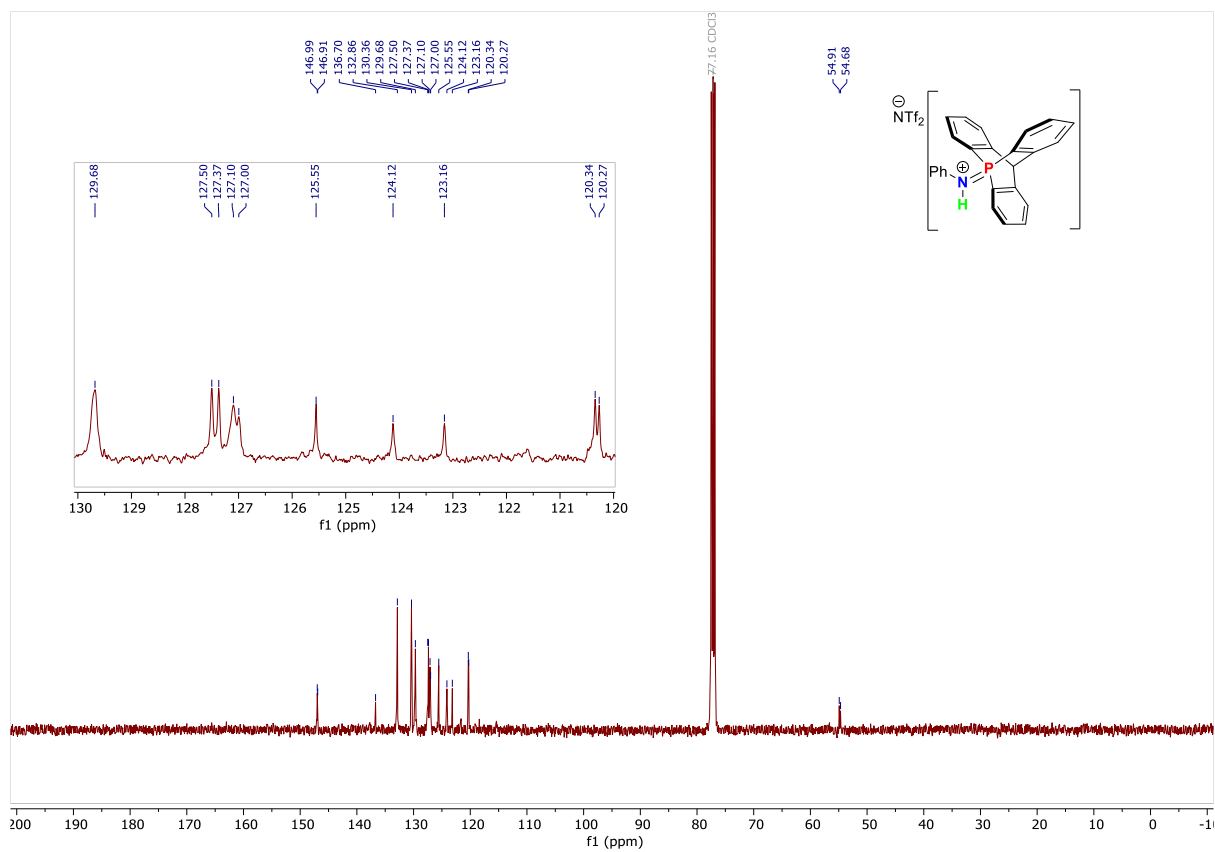

$^{13}\text{C}$  NMR (101 MHz, 25 °C,  $\text{CDCl}_3$ ) of **15**

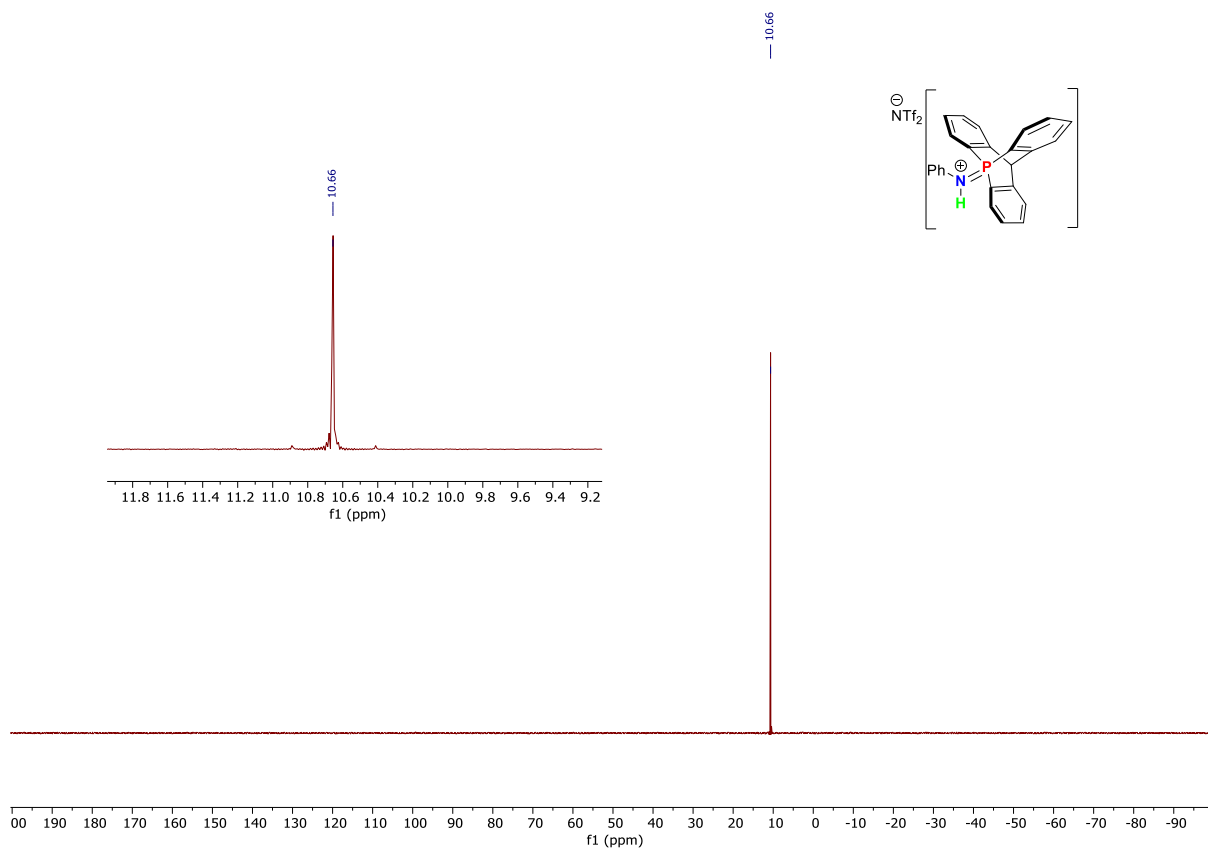

$^{31}\text{P}$  NMR (202 MHz, 25 °C,  $\text{CDCl}_3$ ) of **15**



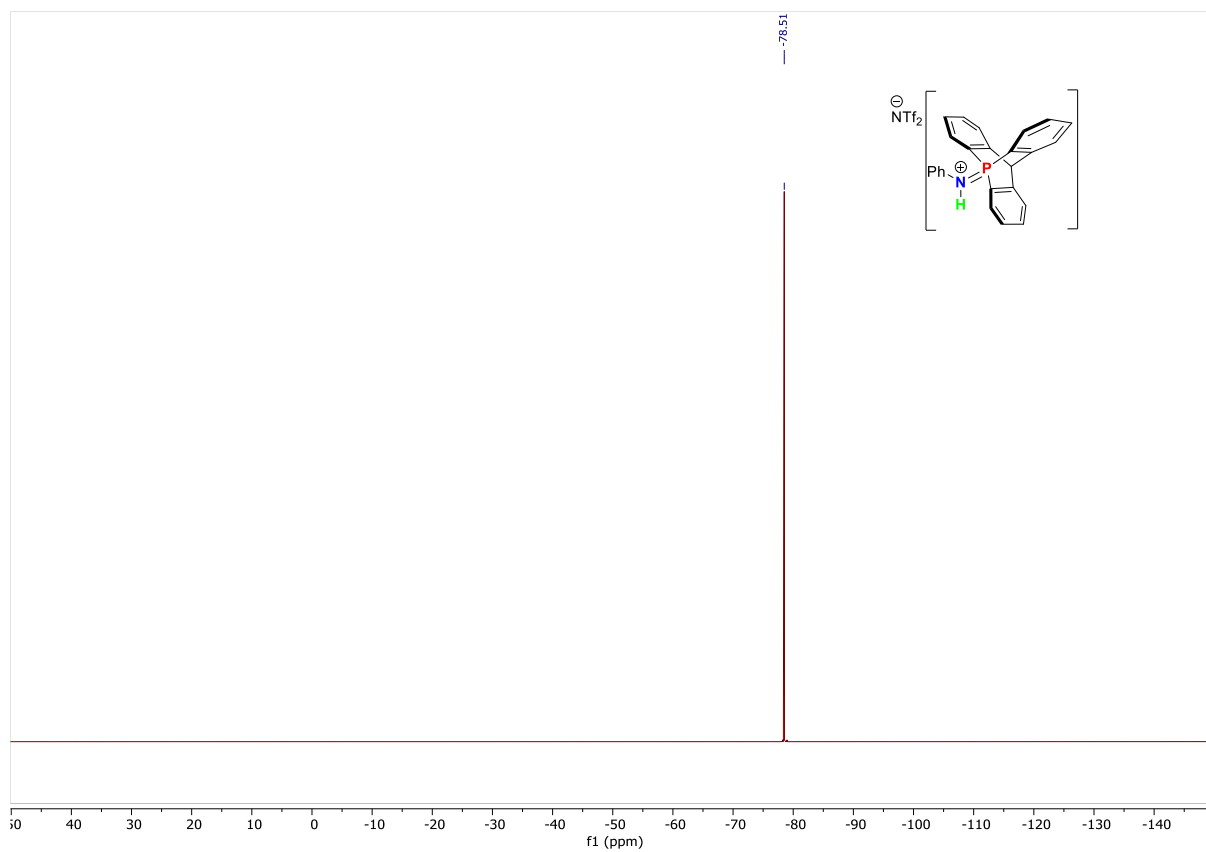

$^{19}\text{F}$  NMR (471 MHz, 25 °C,  $\text{CDCl}_3$ ) of **15**

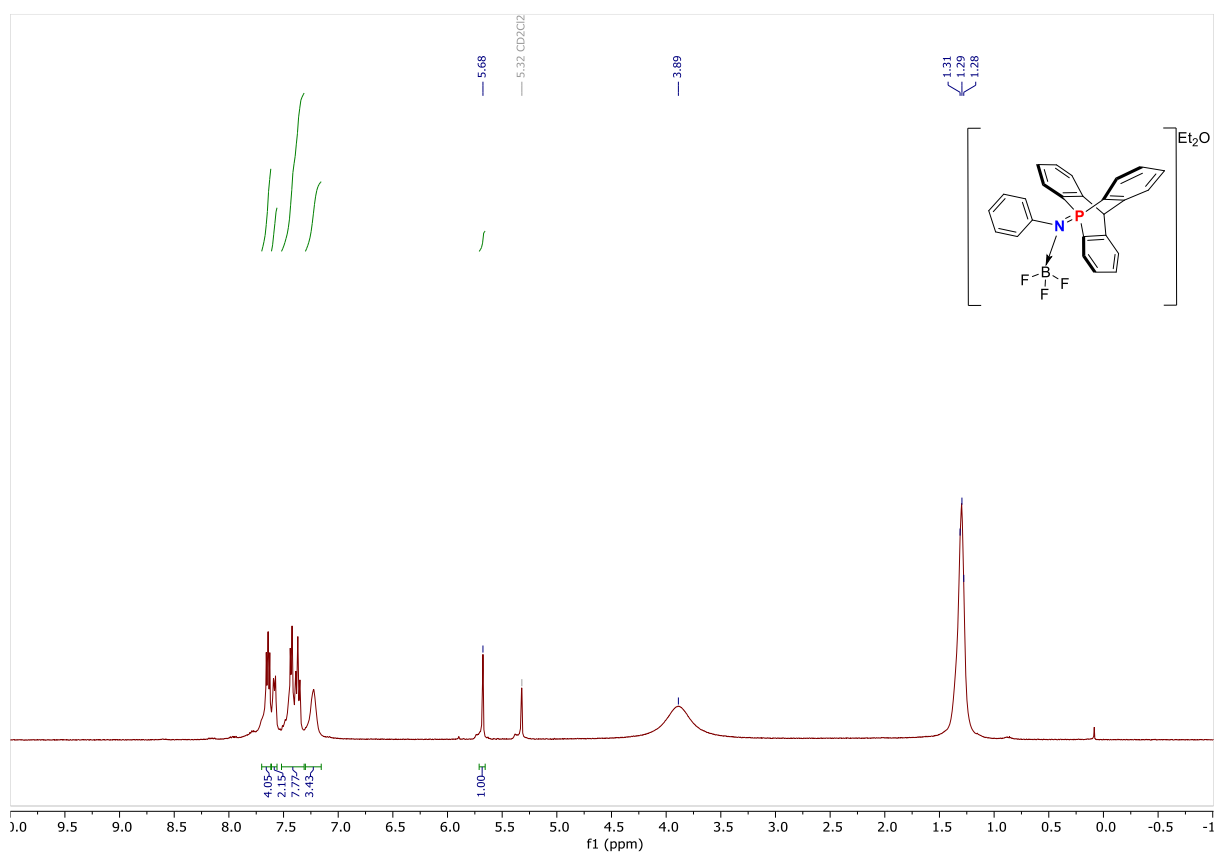

$^1\text{H}$  NMR (400 MHz, 25 °C,  $\text{CD}_2\text{Cl}_2$ ) of **16**

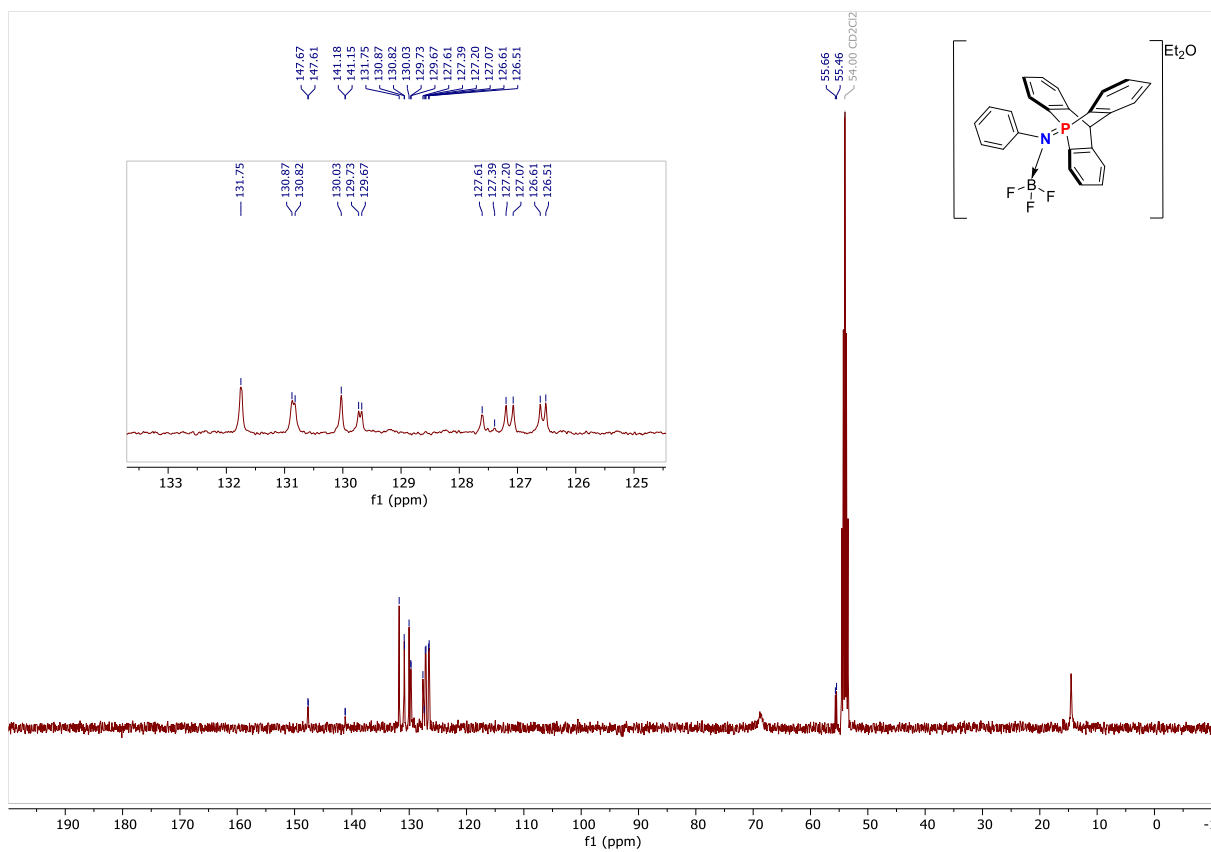

**<sup>13</sup>C NMR (101 MHz, 25 °C, CD<sub>2</sub>Cl<sub>2</sub>) of 16**

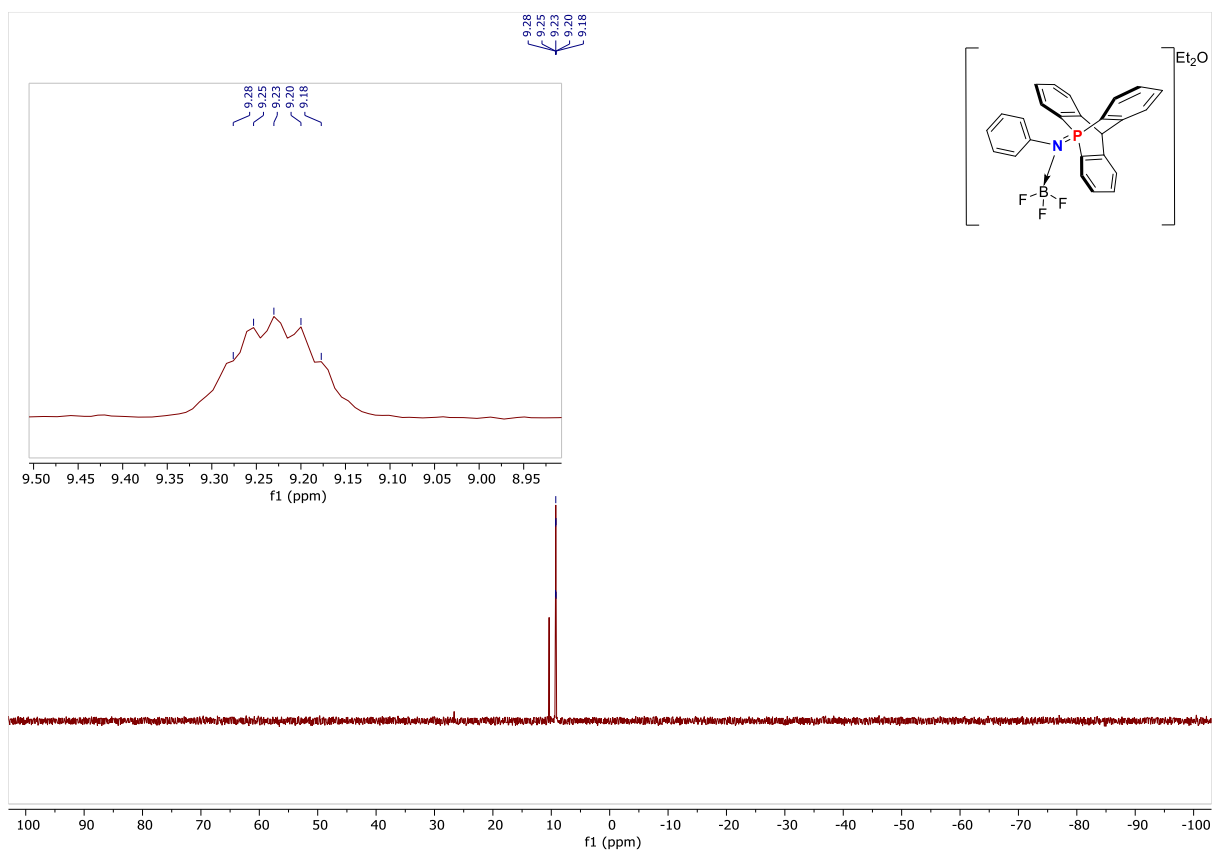

**<sup>31</sup>P NMR (202 MHz, 25 °C, CD<sub>2</sub>Cl<sub>2</sub>) of 16**

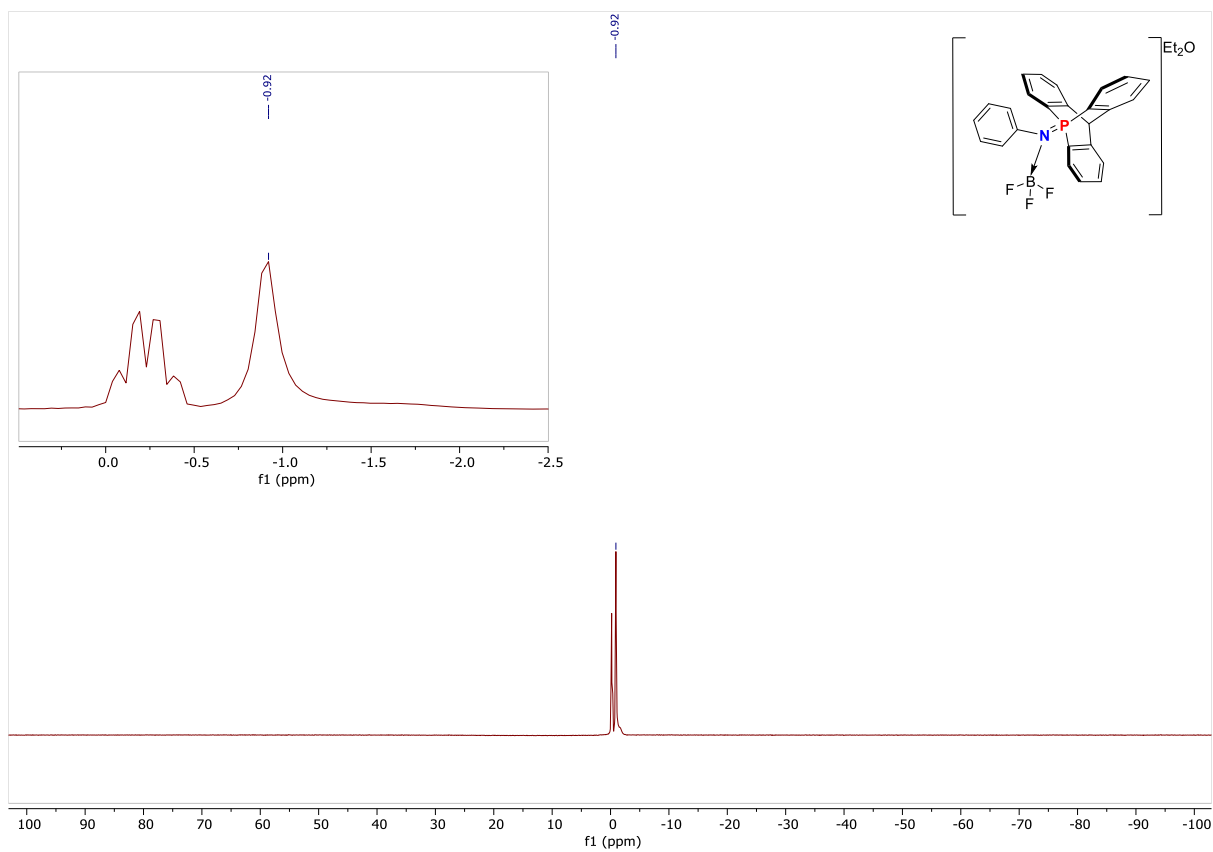

$^{11}\text{B}$  NMR (160 MHz, 25 °C,  $\text{CD}_2\text{Cl}_2$ ) of **16**

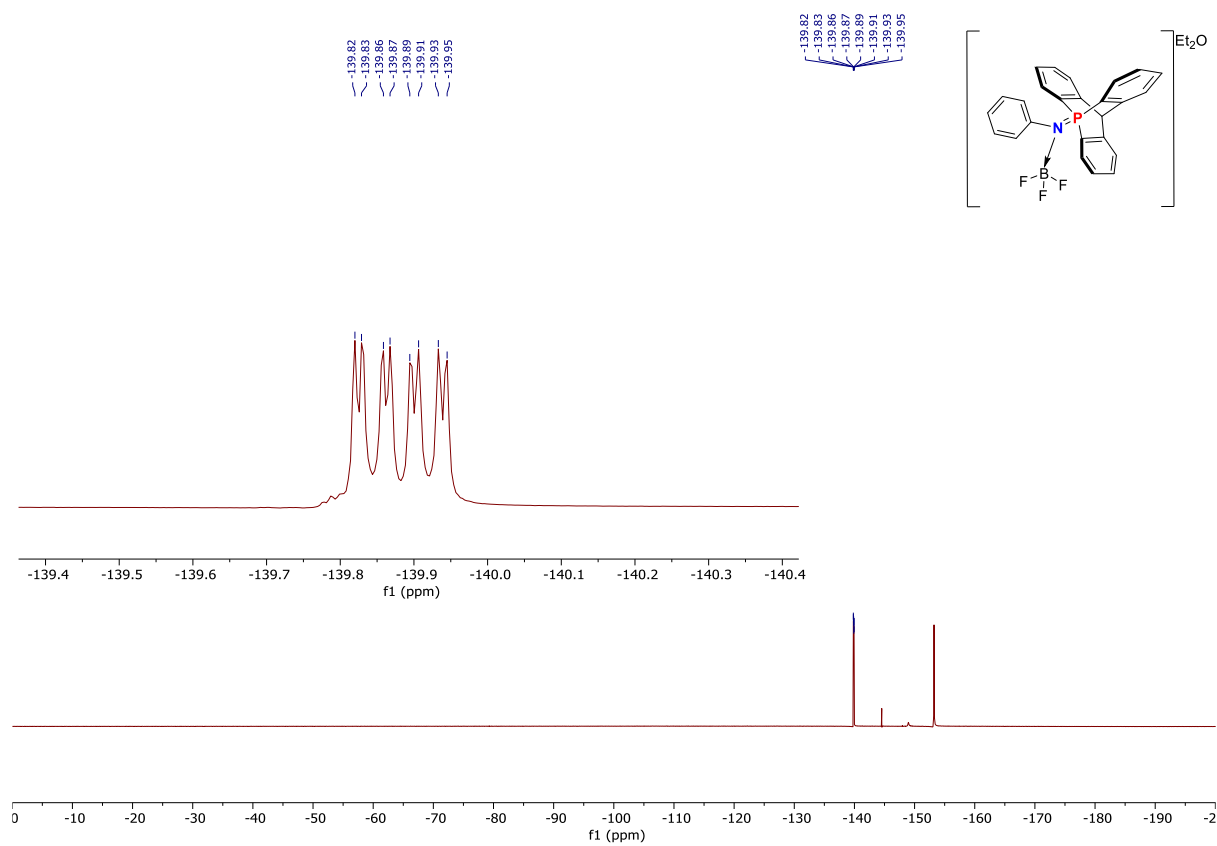

$^{19}\text{F}$  NMR (471 MHz, 25 °C,  $\text{CD}_2\text{Cl}_2$ ) of **16**

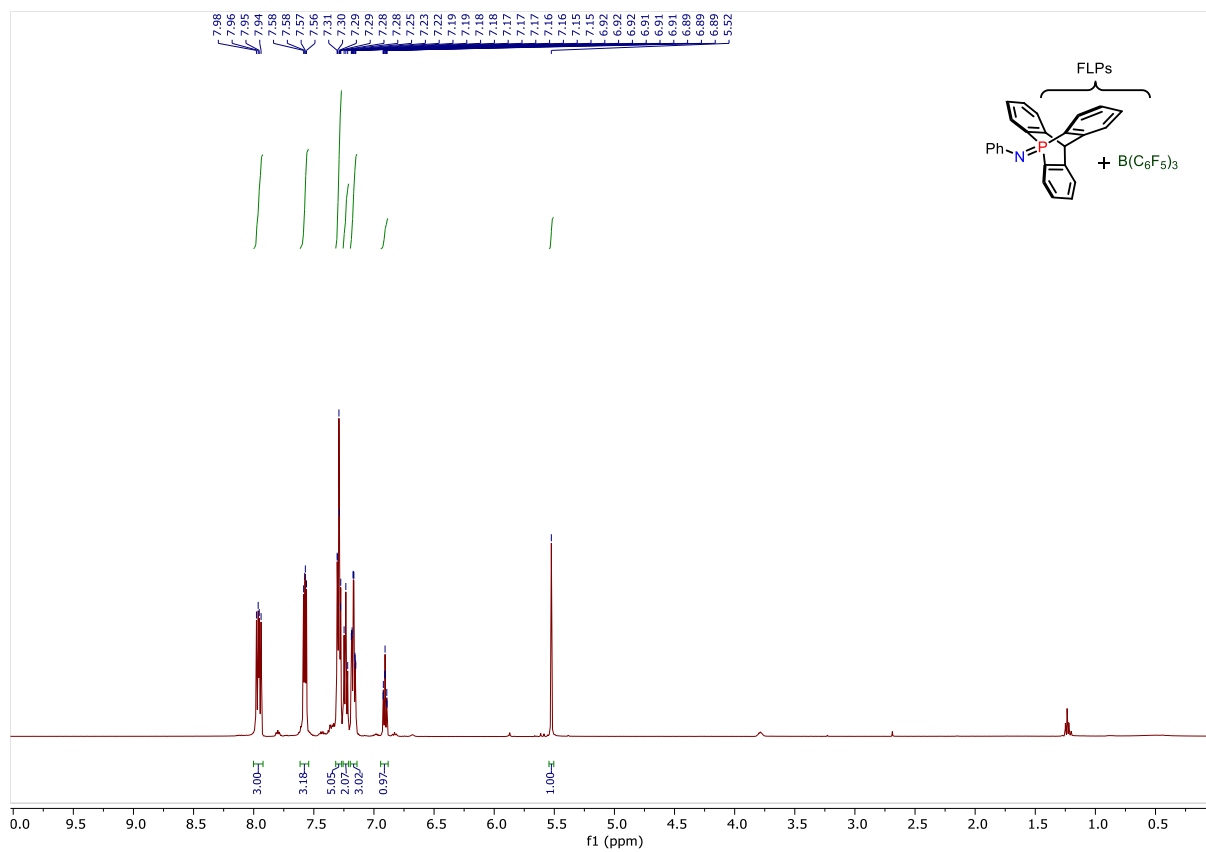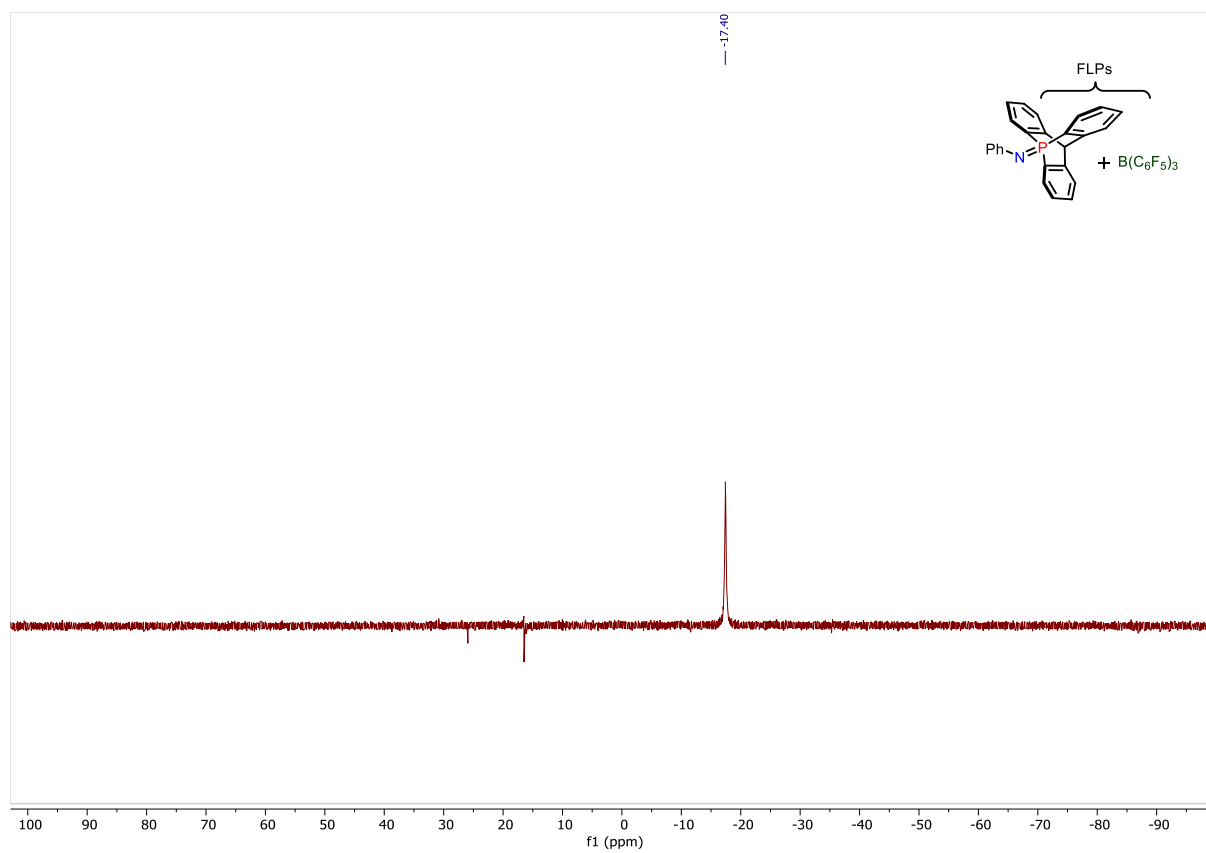

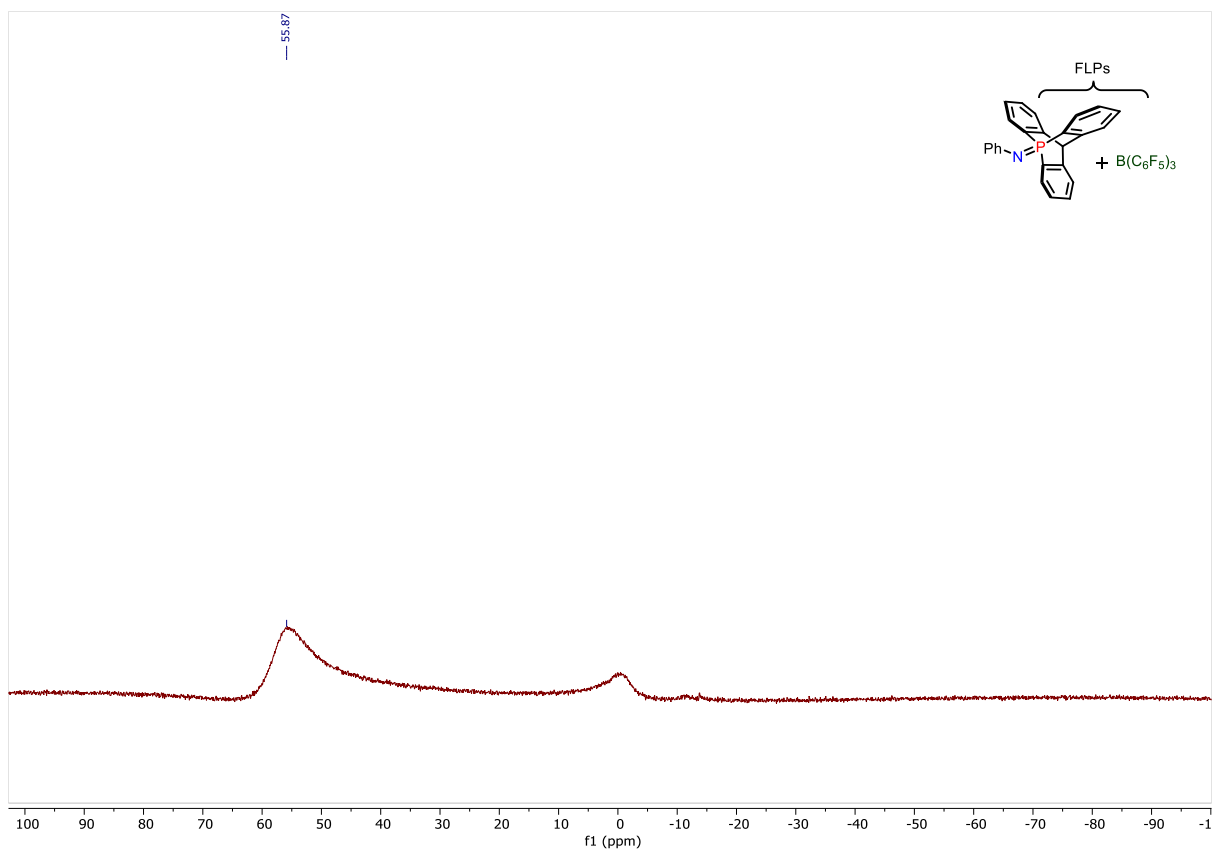

$^{11}\text{B}$  NMR (160 MHz, 25 °C,  $\text{CDCl}_3$ ) of the FLP between **13** and **17**.

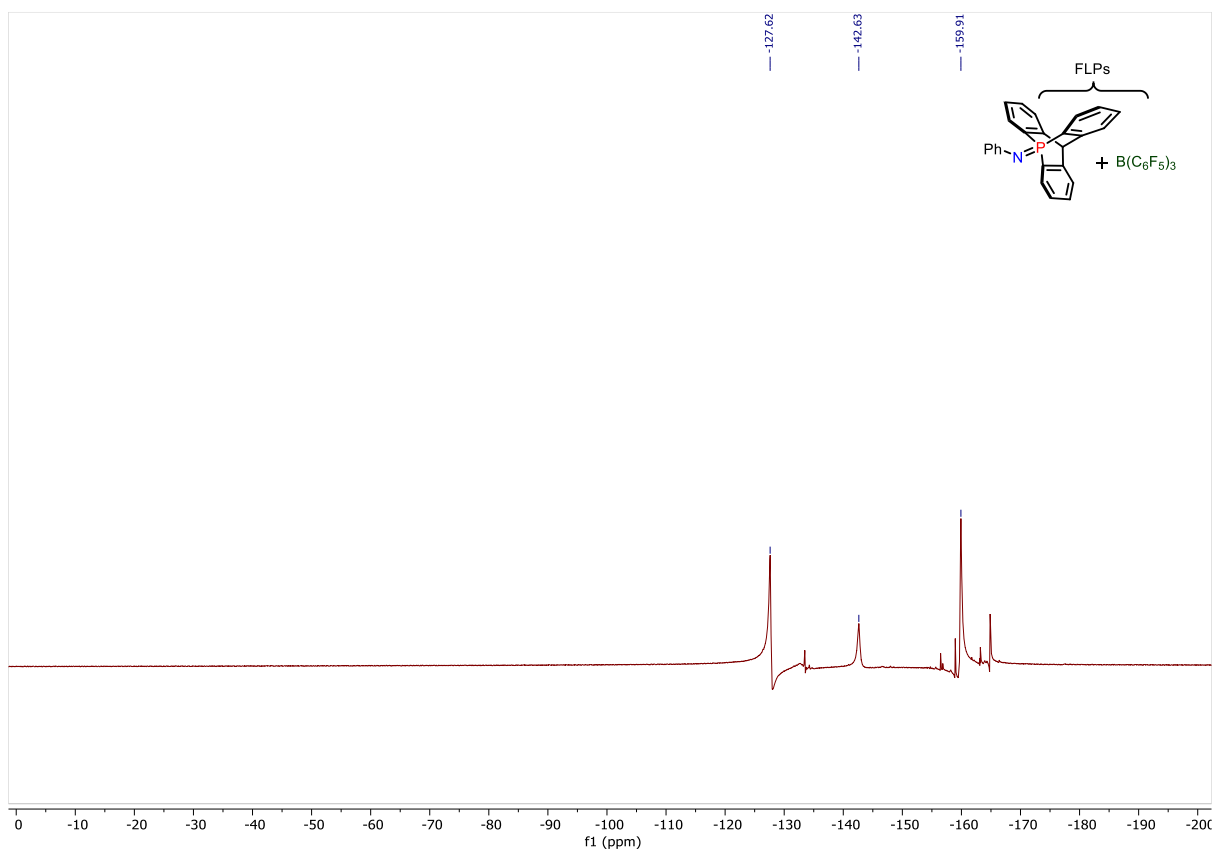

$^{19}\text{F}$  NMR (471 MHz, 25 °C,  $\text{CDCl}_3$ ) of the FLP between **13** and **17**.

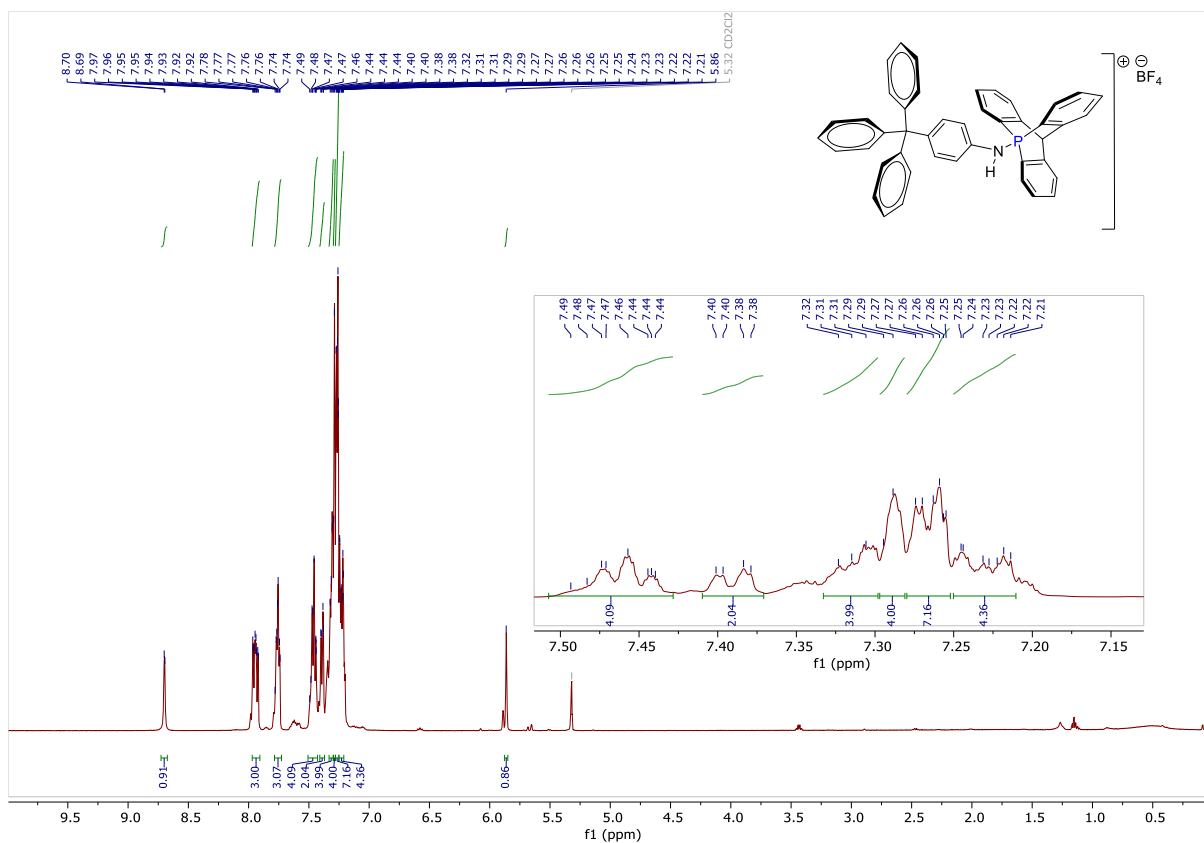

<sup>1</sup>H NMR (500 MHz, 25 °C, CD<sub>2</sub>Cl<sub>2</sub>) of **20**.

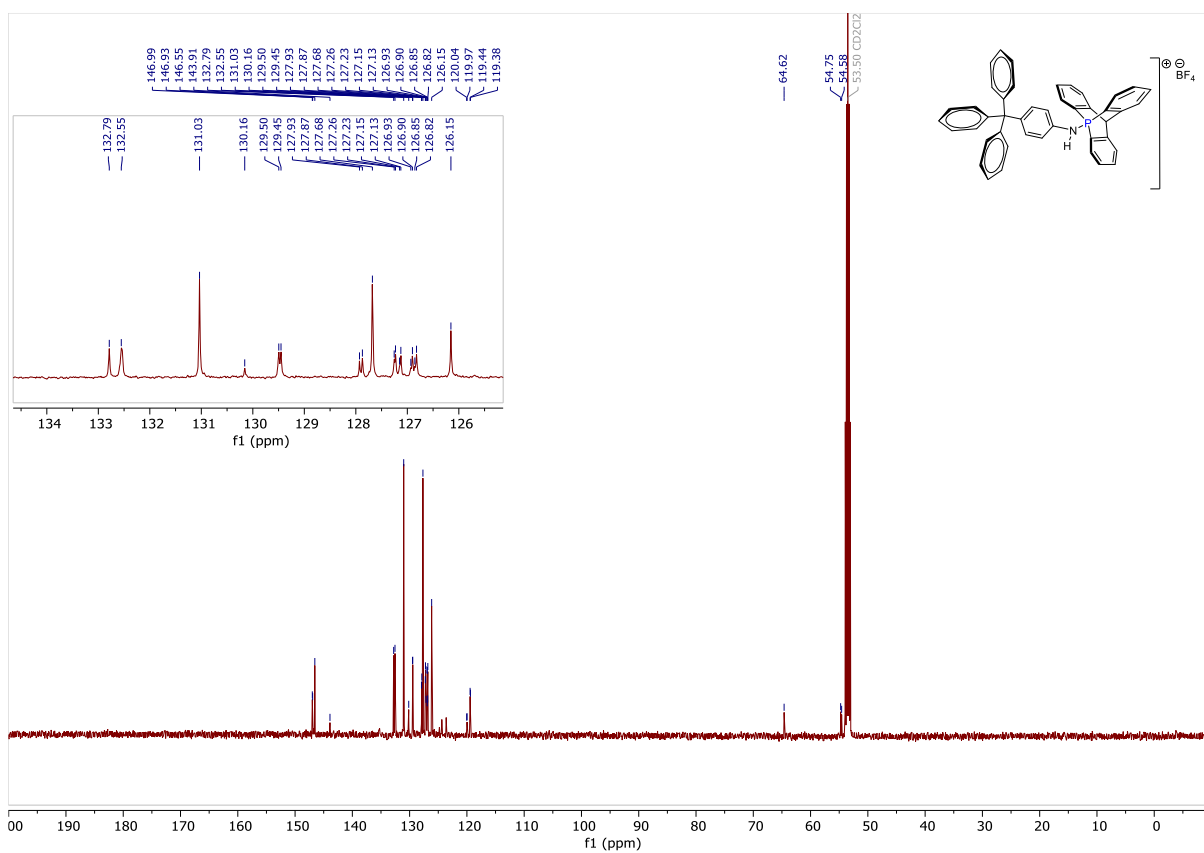

<sup>13</sup>C NMR (126 MHz, 25 °C, CD<sub>2</sub>Cl<sub>2</sub>) of **20**

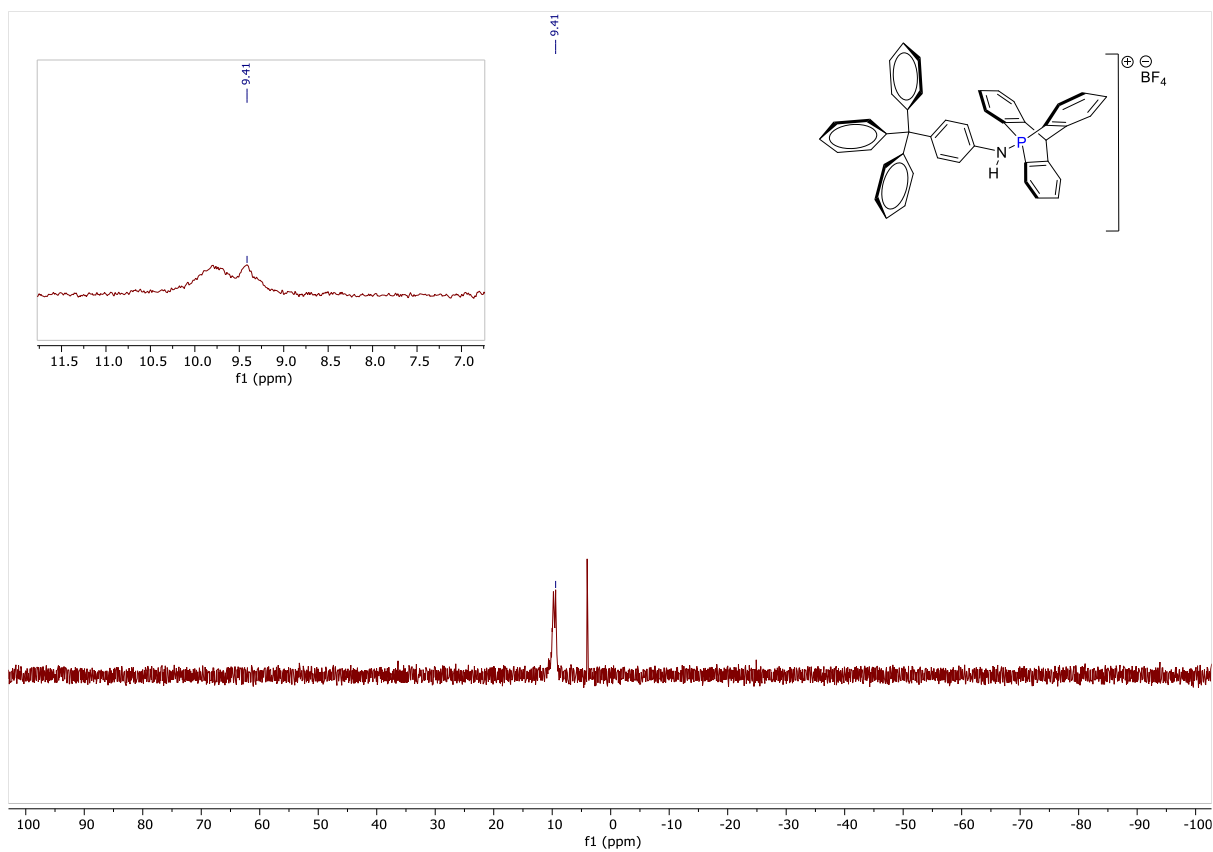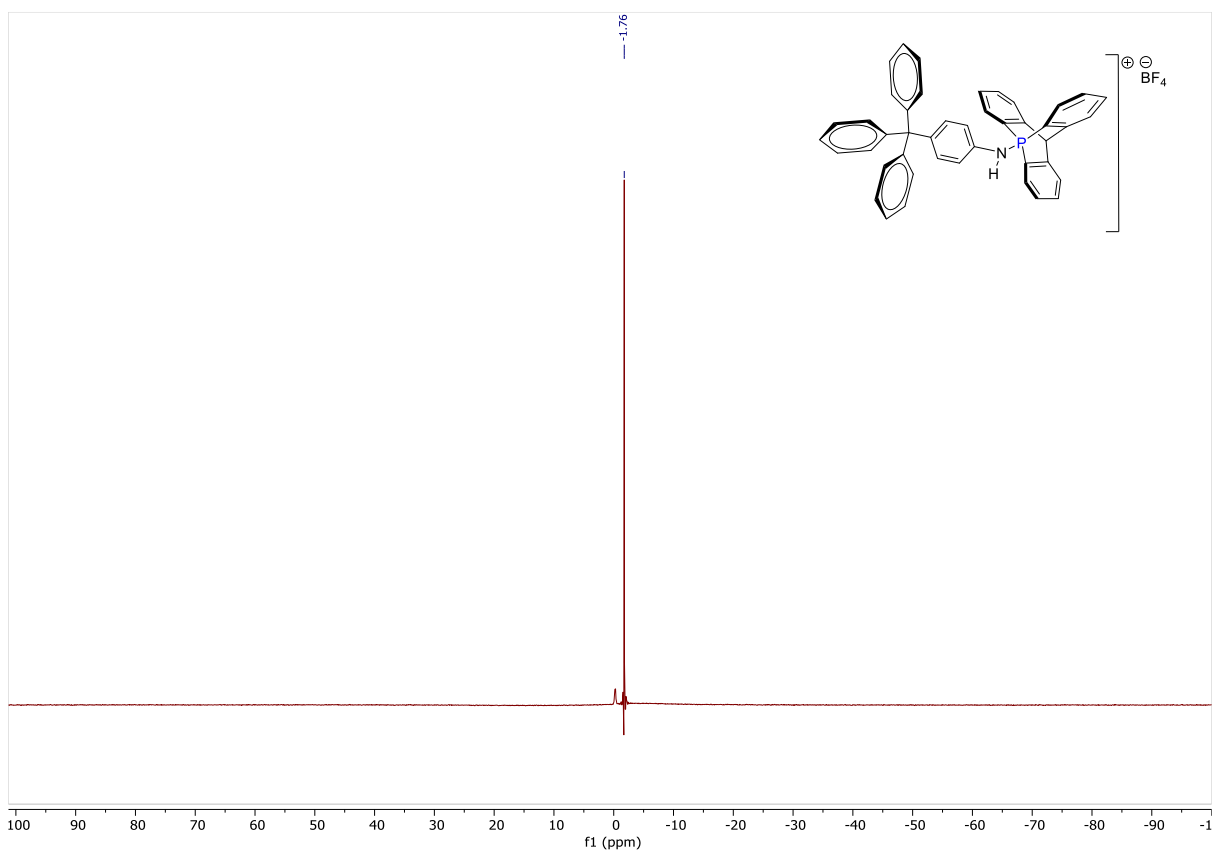

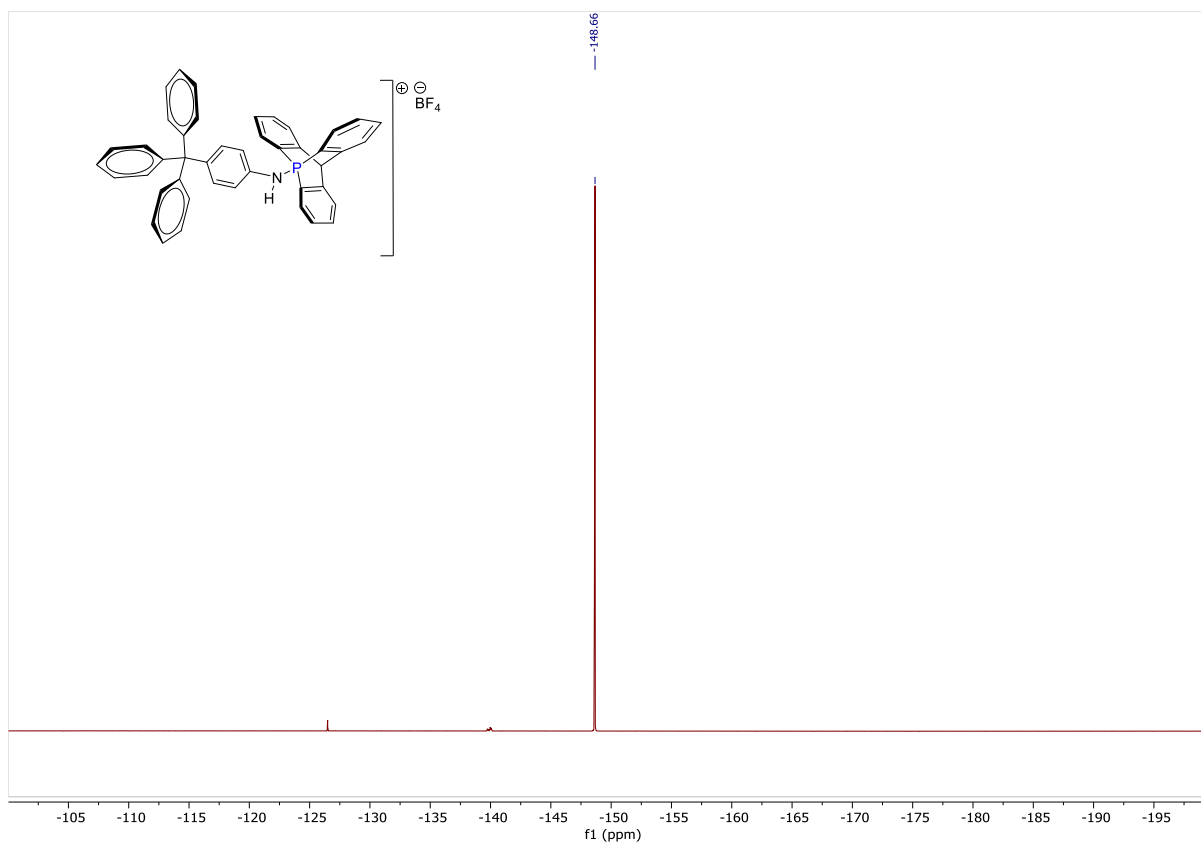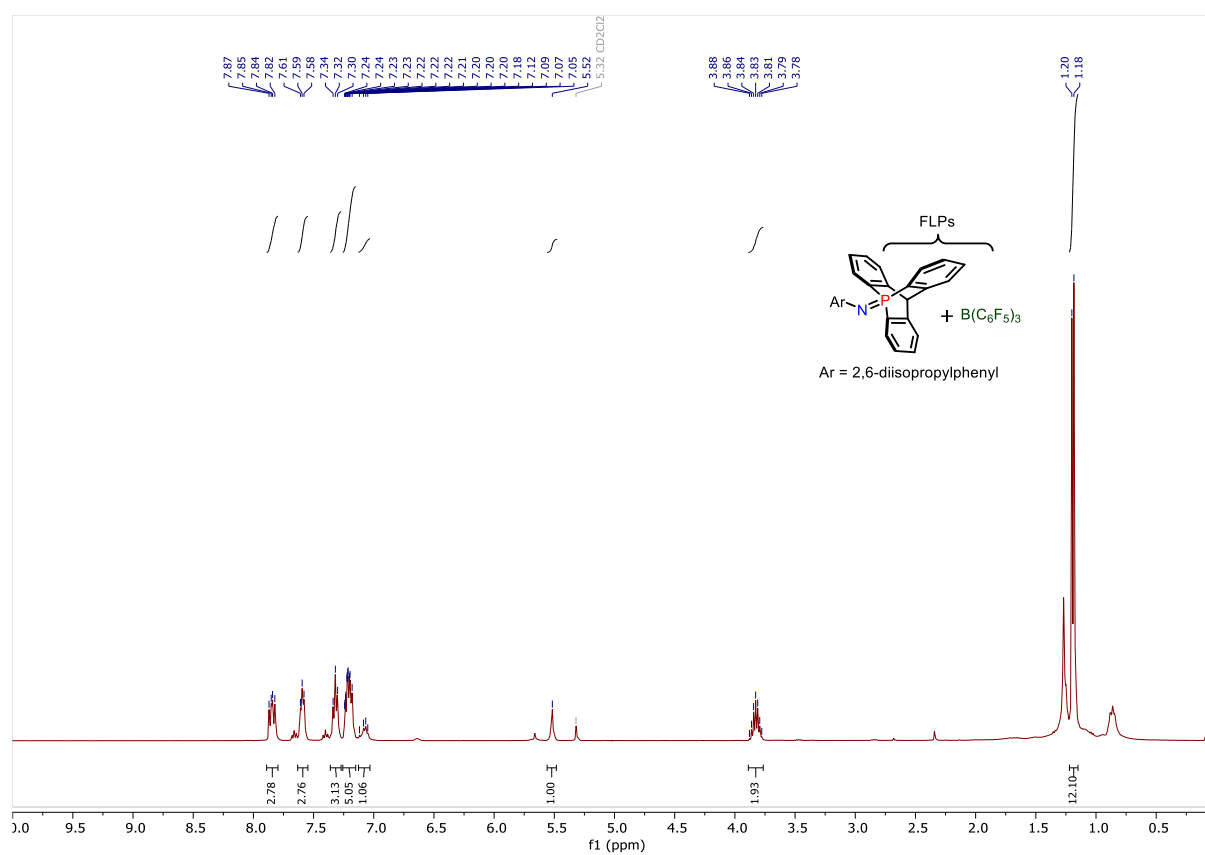



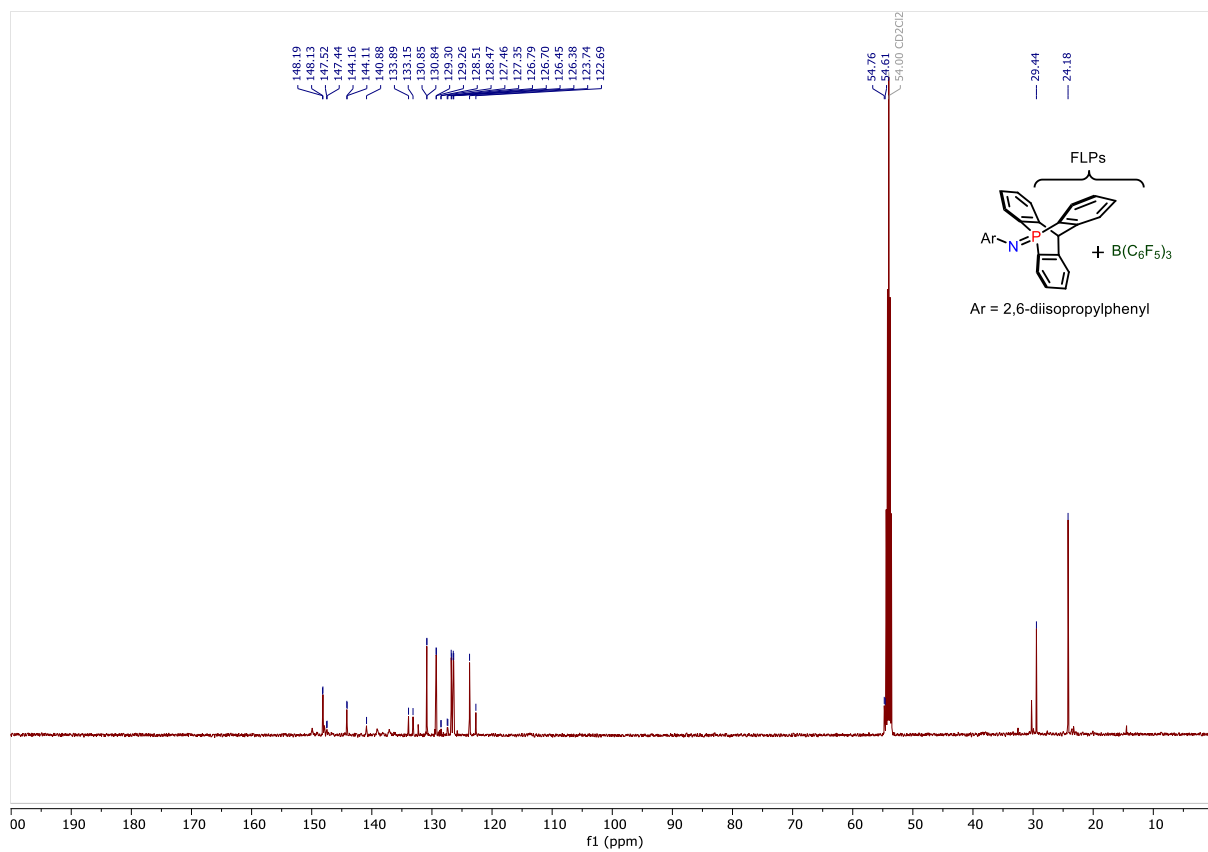

$^{13}\text{C}$  NMR (126 MHz, 25 °C,  $\text{CD}_2\text{Cl}_2$ ) of **21**

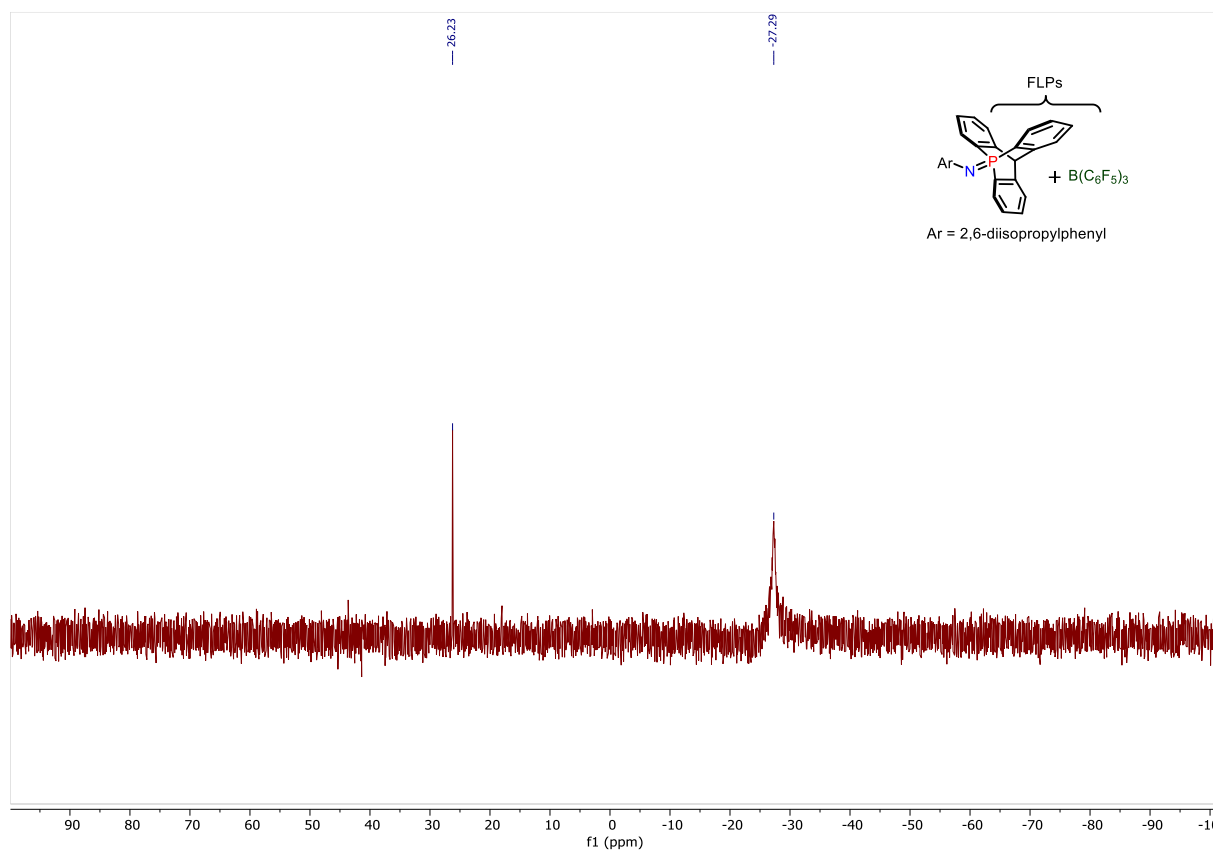

$^{31}\text{P}$  NMR (162 MHz, 25 °C,  $\text{CD}_2\text{Cl}_2$ ) of **21**.

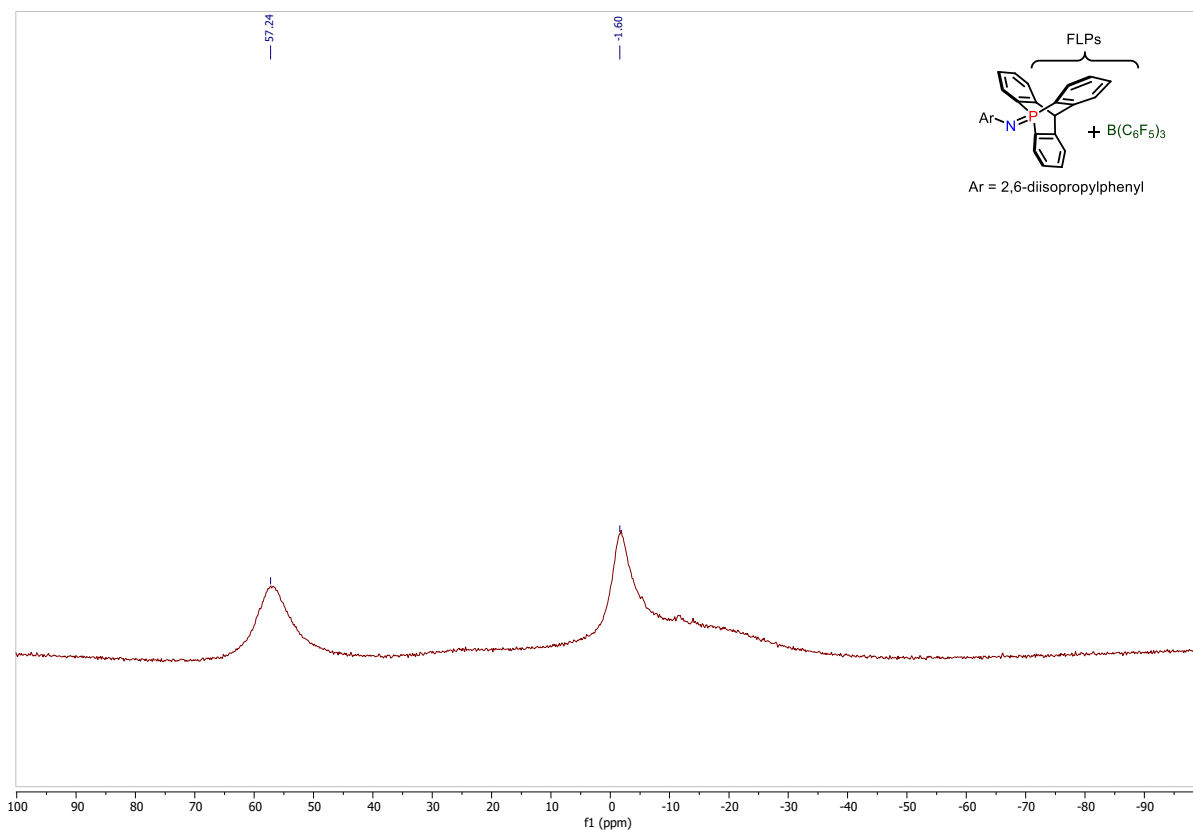

<sup>11</sup>B NMR (128 MHz, 25 °C, CD<sub>2</sub>Cl<sub>2</sub>) of **21**

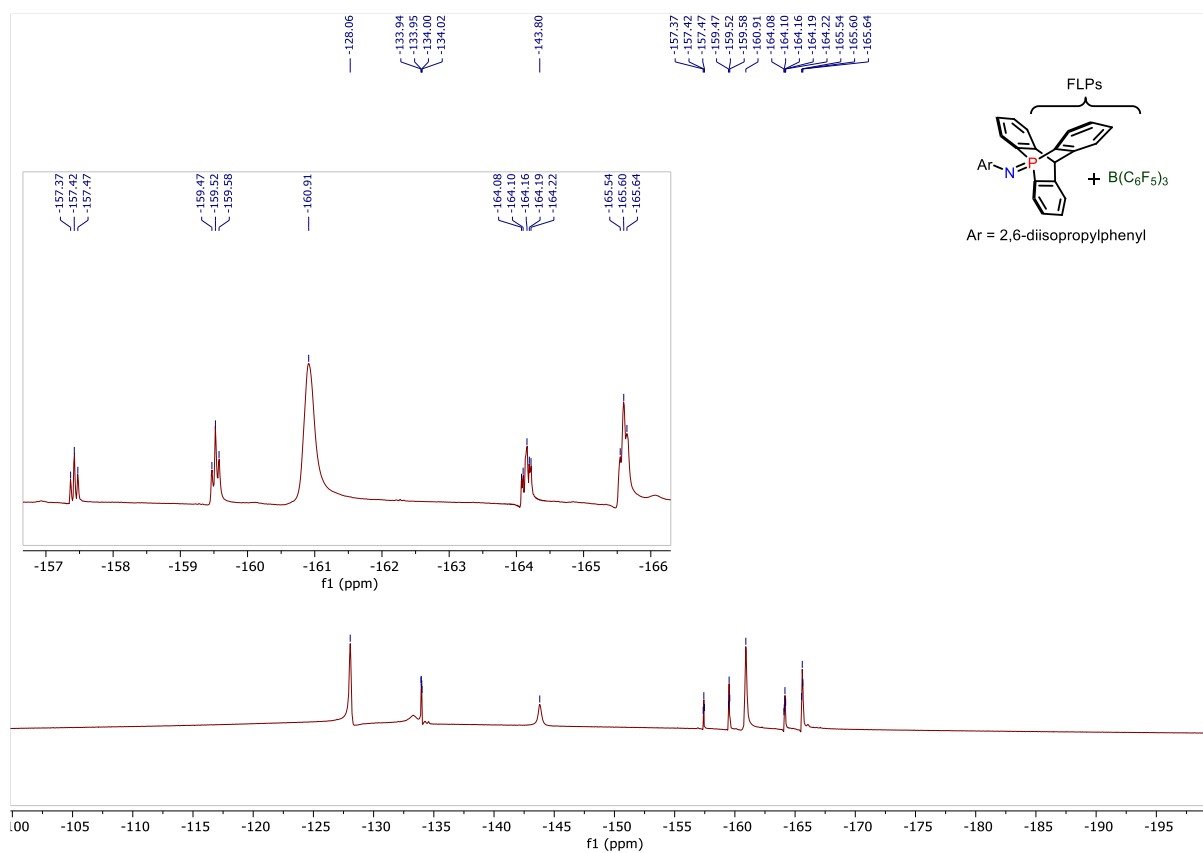

<sup>19</sup>F NMR (376 MHz, 25 °C, CD<sub>2</sub>Cl<sub>2</sub>) of **21**

## 5. Crystallographic data

Diffraction data were collected using the Oxford Diffraction Gemini R Ultra (Cu K $\alpha$  with multilayer mirrors or Mo K $\alpha$  with graphite monochromator, Ruby CCD area detector) and Bruker D8 Venture (Cu K $\alpha$  or Ag K $\alpha$  microsource, multilayer mirror, Photon III C14 detector) diffractometers. Data collection, unit cells determination and data reduction were carried out using CrysAlis PRO software package<sup>3</sup> and APEX4 software package<sup>x</sup> using Olex2<sup>4</sup> and shelXle<sup>5a</sup>, the structure was solved with the SHELXT 2015<sup>3b</sup> structure solution program by Intrinsic Phasing methods and refined by full-matrix least squares on  $|F|^2$  using SHELXL-2018/3<sup>3b</sup>. Non-hydrogen atoms were refined anisotropically. Most of hydrogen atoms were located from electron density map. In most cases, hydrogen atoms, not involved in hydrogen bonding, were placed on calculated positions in riding mode with temperature factors fixed at 1.2 times  $U_{eq}$  of the parent carbon atoms (1.5 times for methyl groups). Details of the data collection and refinement are given in the table below.

The compound **6** reported in Table 1 was found to stabilize a molecule of H<sub>2</sub>O<sub>2</sub> in the solid-state by interacting through two hydrogen bonds as shown below. It also crystallized with or without molecules of water as shown in Table S1.

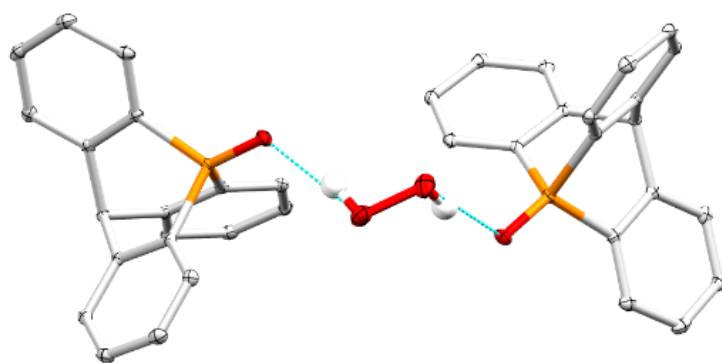

**Figure S1.** Ellipsoid representation of single crystal X-ray structure of **6** in the presence of H<sub>2</sub>O<sub>2</sub> molecule showing the two hydrogen bonds between the OH groups of H<sub>2</sub>O<sub>2</sub> and two P=O oxides functionalities of molecule **6**. Ellipsoid values are at 50% probability level, H-atoms in the molecule are omitted for clarity.

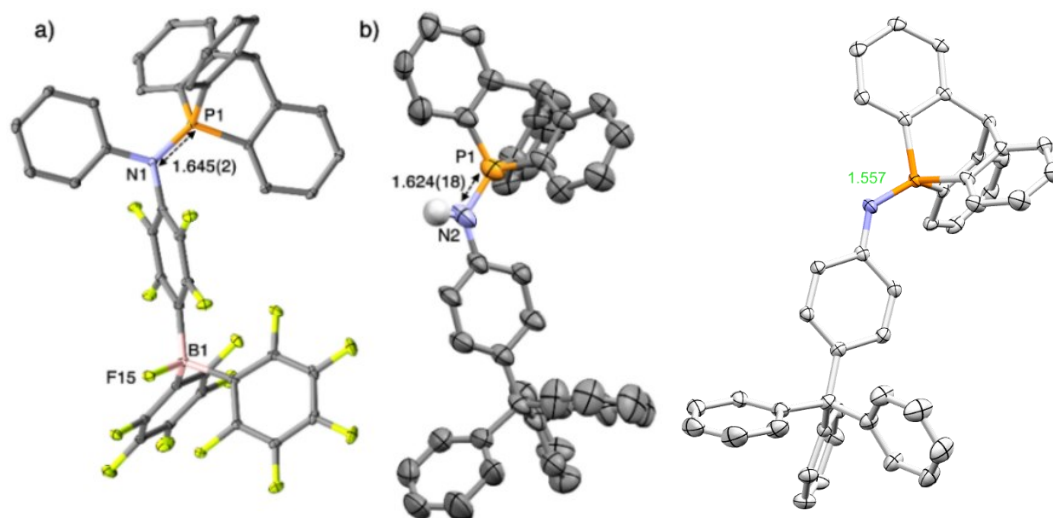

**Figure S2:** Ellipsoid representation (50% probability level) of single-crystal X-ray structures of **18** (a), and **21** (b). H atoms, anion and solvent omitted for clarity. For the structure of the neutral form of compound **21** (right) see structure CCDC 2353832.

**Table S1. Experimental crystallographic details**

|                                                                                                                | <b>6</b>                                       | <b>6·½H<sub>2</sub>O</b>                               | <b>6·½H<sub>2</sub>O LT</b>                            | <b>6·½H<sub>2</sub>O<sub>2</sub></b>                                   |
|----------------------------------------------------------------------------------------------------------------|------------------------------------------------|--------------------------------------------------------|--------------------------------------------------------|------------------------------------------------------------------------|
| Chemical formula                                                                                               | C <sub>19</sub> H <sub>13</sub> OP             | 2(C <sub>19</sub> H <sub>13</sub> OP)·H <sub>2</sub> O | 2(C <sub>19</sub> H <sub>13</sub> OP)·H <sub>2</sub> O | C <sub>19</sub> H <sub>13</sub> OP·0.5(H <sub>2</sub> O <sub>2</sub> ) |
| <i>M<sub>r</sub></i>                                                                                           | 288.26                                         | 594.54                                                 | 594.54                                                 | 305.27                                                                 |
| Crystal system, space group                                                                                    | Triclinic, <i>P</i> <sup>-</sup> 1             | Orthorhombic, <i>Pbca</i>                              | Orthorhombic, <i>Pbca</i>                              | Monoclinic, <i>C2/c</i>                                                |
| Temperature (K)                                                                                                | 100                                            | 295                                                    | 100                                                    | 100                                                                    |
| <i>a</i> , <i>b</i> , <i>c</i> (Å)                                                                             | 7.2774 (2), 8.0944 (3), 13.1388 (4)            | 16.51047 (10), 16.41081 (10), 23.08005 (14)            | 16.3712 (2), 16.2810 (2), 22.9501 (3)                  | 20.3958 (6), 13.4454 (6), 12.1945 (4)                                  |
| α, β, γ (°)                                                                                                    | 81.7506 (9), 79.8049 (10), 70.6319 (9)         | 90, 90, 90                                             | 90, 90, 90                                             | 90, 117.604 (1), 90                                                    |
| <i>V</i> (Å <sup>3</sup> )                                                                                     | 715.63 (4)                                     | 6253.54 (7)                                            | 6117.11 (13)                                           | 2963.44 (19)                                                           |
| <i>Z</i>                                                                                                       | 2                                              | 8                                                      | 8                                                      | 8                                                                      |
| Radiation type                                                                                                 | Cu <i>K</i> α                                  | Cu <i>K</i> α                                          | Cu <i>K</i> α                                          | Cu <i>K</i> α                                                          |
| μ (mm <sup>-1</sup> )                                                                                          | 1.65                                           | 1.55                                                   | 1.58                                                   | 1.68                                                                   |
| Crystal size (mm)                                                                                              | 0.36 × 0.26 × 0.07                             | 0.44 × 0.31 × 0.14                                     | 0.24 × 0.22 × 0.11                                     | 0.29 × 0.18 × 0.13                                                     |
| Diffractometer                                                                                                 | Bruker D8 Venture                              | Oxford Diffraction Gemini Ultra R                      | Bruker D8 Venture                                      |                                                                        |
| Absorption correction                                                                                          | Numerical                                      | Analytical                                             | Numerical                                              |                                                                        |
| <i>T</i> <sub>min</sub> , <i>T</i> <sub>max</sub>                                                              | 0.637, 1.000                                   | 0.641, 0.864                                           | 0.58, 0.84                                             | 0.59, 0.81                                                             |
| No. of measured, independent and observed reflections                                                          | 27465, 2579, 2578 [ <i>I</i> > 2σ( <i>I</i> )] | 28008, 5550, 5212 [ <i>I</i> > 2σ( <i>I</i> )]         | 47278, 5577, 4794 [ <i>I</i> > 2σ( <i>I</i> )]         | 24650, 2676, 2671 [ <i>I</i> > 2σ( <i>I</i> )]                         |
| <i>R</i> <sub>int</sub>                                                                                        | 0.036                                          | 0.019                                                  | 0.050                                                  | 0.047                                                                  |
| θ <sub>max</sub> (°)                                                                                           | 68.2                                           | 67.1                                                   | 68.2                                                   | 68.1                                                                   |
| (sin θ/λ) <sub>max</sub> (Å <sup>-1</sup> )                                                                    | 0.602                                          | 0.598                                                  | 0.602                                                  | 0.602                                                                  |
| <i>R</i> [ <i>F</i> <sup>2</sup> > 2σ( <i>F</i> <sup>2</sup> )], <i>wR</i> ( <i>F</i> <sup>2</sup> ), <i>S</i> | 0.034, 0.086, 1.12                             | 0.034, 0.097, 1.07                                     | 0.052, 0.146, 1.11                                     | 0.035, 0.089, 1.08                                                     |
| No. of reflections                                                                                             | 2579                                           | 5550                                                   | 5577                                                   | 2676                                                                   |
| No. of parameters                                                                                              | 380                                            | 980                                                    | 980                                                    | 204                                                                    |
| No. of restraints                                                                                              | 391                                            | 1047                                                   | 1099                                                   | 0                                                                      |
| H-atom treatment                                                                                               | constrained                                    |                                                        |                                                        | mixed                                                                  |
| Δρ <sub>max</sub> , Δρ <sub>min</sub> (e·Å <sup>-3</sup> )                                                     | 0.27, -0.45                                    | 0.18, -0.23                                            | 0.31, -0.30                                            | 0.41, -0.32                                                            |
| CCDC deposition number                                                                                         | 2347266                                        | 2313762                                                | 2347267                                                | 2347268                                                                |

|                                                                                                                            | <b>7</b>                                                   | <b>7 (LT)</b>                                              | <b>8</b>                                                   | <b>8 (LT)</b>                                              |
|----------------------------------------------------------------------------------------------------------------------------|------------------------------------------------------------|------------------------------------------------------------|------------------------------------------------------------|------------------------------------------------------------|
| Chemical formula                                                                                                           | C <sub>19</sub> H <sub>13</sub> PS                         | C <sub>19</sub> H <sub>13</sub> PS                         | C <sub>19</sub> H <sub>13</sub> PSe                        | C <sub>19</sub> H <sub>13</sub> PSe                        |
| <i>M</i> <sub>r</sub>                                                                                                      | 304.32                                                     | 304.36                                                     | 351.22                                                     | 351.22                                                     |
| Crystal system, space group                                                                                                | Monoclinic, <i>C2/c</i>                                    | Monoclinic, <i>C2/c</i>                                    | Monoclinic, <i>C2/c</i>                                    | Monoclinic, <i>C2/c</i>                                    |
| Temperature (K)                                                                                                            | 297                                                        | 100                                                        | 297                                                        | 100                                                        |
| <i>a</i> , <i>b</i> , <i>c</i> (Å)                                                                                         | 14.2480 (3),<br>13.5359 (3),<br>15.8127 (3)                | 14.0811 (3), 13.4388<br>(3), 15.6879 (4)                   | 14.1963 (6), 13.7375<br>(6), 15.8281 (7)                   | 14.0369 (5), 13.6803 (5),<br>15.7202 (5)                   |
| $\alpha$ , $\beta$ , $\gamma$ (°)                                                                                          | 90, 90.772 (1),<br>90                                      | 90, 90.464 (1), 90                                         | 90, 90.897 (1), 90                                         | 90, 90.789 (1), 90                                         |
| <i>V</i> (Å <sup>3</sup> )                                                                                                 | 3049.35 (11)                                               | 2968.57 (12)                                               | 3086.4 (2)                                                 | 3018.45 (18)                                               |
| <i>Z</i>                                                                                                                   | 8                                                          | 8                                                          | 8                                                          | 8                                                          |
| Radiation type                                                                                                             | Cu <i>K</i> $\alpha$                                       | Cu <i>K</i> $\alpha$                                       | Ag <i>K</i> $\alpha$ , $\lambda = 0.56086$<br>Å            | Ag <i>K</i> $\alpha$ , $\lambda = 0.56086$ Å               |
| $\mu$ (mm <sup>-1</sup> )                                                                                                  | 2.77                                                       | 2.85                                                       | 1.34                                                       | 1.37                                                       |
| Crystal size (mm)                                                                                                          | 0.13 × 0.11 ×<br>0.05                                      | 0.22 × 0.19 × 0.18                                         | 0.47 × 0.29 × 0.18                                         | 0.29 × 0.27 × 0.12                                         |
| Diffractometer                                                                                                             | Bruker D8 Venture                                          |                                                            |                                                            |                                                            |
| Absorption correction                                                                                                      | Numerical                                                  |                                                            |                                                            |                                                            |
| <i>T</i> <sub>min</sub> , <i>T</i> <sub>max</sub>                                                                          | 0.772, 1.000                                               | 0.772, 1.000                                               | 0.265, 0.465                                               | 0.61, 0.85                                                 |
| No. of measured,<br>independent and<br>observed reflections                                                                | 22816, 2701,<br>2431 [ <i>I</i> > 2 $\sigma$ ( <i>I</i> )] | 42618, 2716, 2685 [ <i>I</i> ≥<br>2 <i>u</i> ( <i>I</i> )] | 40566, 3150, 2866 [ <i>I</i><br>> 2 $\sigma$ ( <i>I</i> )] | 17865, 2661, 2503 [ <i>I</i> ><br>2 $\sigma$ ( <i>I</i> )] |
| <i>R</i> <sub>int</sub>                                                                                                    | 0.041                                                      | 0.040                                                      | 0.053                                                      | 0.056                                                      |
| $\theta$ <sub>max</sub> (°)                                                                                                | 66.7                                                       | 68.2                                                       | 20.5                                                       | 19.5                                                       |
| ( $\sin \theta/\lambda$ ) <sub>max</sub> (Å <sup>-1</sup> )                                                                | 0.596                                                      | 0.602                                                      | 0.625                                                      | 0.595                                                      |
| <i>R</i> [ <i>F</i> <sup>2</sup> > 2 $\sigma$ ( <i>F</i> <sup>2</sup> )],<br><i>wR</i> ( <i>F</i> <sup>2</sup> ), <i>S</i> | 0.034, 0.093,<br>1.08                                      | 0.015, 0.036, 1.10                                         | 0.039, 0.104, 1.09                                         | 0.029, 0.078, 1.08                                         |
| No. of reflections                                                                                                         | 2701                                                       | 2716                                                       | 3150                                                       | 2661                                                       |
| No. of parameters                                                                                                          | 190                                                        | 307                                                        | 190                                                        | 190                                                        |
| No. of restraints                                                                                                          | 0                                                          | 0                                                          | 0                                                          | 0                                                          |
| H-atom treatment                                                                                                           | constrained                                                |                                                            |                                                            |                                                            |
| $\Delta\rho$ <sub>max</sub> , $\Delta\rho$ <sub>min</sub> (e <sup>-</sup> ·Å <sup>-3</sup> )                               | 0.28, -0.26                                                | 0.19, -0.18                                                | 0.67, -0.33                                                | 0.60, -0.34                                                |
| CCDC deposition<br>number                                                                                                  | 2313763                                                    | 2313764                                                    | 2313765                                                    | 2347269                                                    |

|                                                                                       | <b>9</b>                                           | <b>10</b>                                        | <b>11</b>                                                      | <b>12</b>                                          |
|---------------------------------------------------------------------------------------|----------------------------------------------------|--------------------------------------------------|----------------------------------------------------------------|----------------------------------------------------|
| Chemical formula                                                                      | C <sub>26</sub> H <sub>20</sub> NO <sub>2</sub> PS | C <sub>24</sub> H <sub>22</sub> NOP              | C <sub>31</sub> H <sub>23</sub> NO <sub>3</sub> P <sub>2</sub> | C <sub>34</sub> H <sub>36</sub> NO <sub>2</sub> PS |
| $M_r$                                                                                 | 441.46                                             | 371.39                                           | 519.44                                                         | 553.67                                             |
| Crystal system, space group                                                           | Monoclinic, $P2_1/c$                               | Orthorhombic, $Pna2_1$                           | Monoclinic, $P2_1/c$                                           | Orthorhombic, $P2_12_12_1$                         |
| Temperature (K)                                                                       | 295                                                | 295                                              | 100                                                            | 100                                                |
| $a, b, c$ (Å)                                                                         | 8.19512 (14),<br>13.9420 (2),<br>19.4641 (3)       | 17.31590 (19),<br>9.40206 (10),<br>12.48870 (13) | 11.81181 (13),<br>19.91502 (17),<br>11.98573 (13)              | 9.31097 (12), 12.97197 (17),<br>24.0692 (5)        |
| $\alpha, \beta, \gamma$ (°)                                                           | 90, 99.7093 (16),<br>90                            | 90, 90, 90                                       | 90, 118.9392<br>(15), 90                                       | 90, 90, 90                                         |
| $V$ (Å <sup>3</sup> )                                                                 | 2192.04 (7)                                        | 2033.23 (4)                                      | 2467.38 (5)                                                    | 2907.12 (8)                                        |
| $Z$                                                                                   | 4                                                  | 4                                                | 4                                                              | 4                                                  |
| Radiation type                                                                        | Cu $K\alpha$                                       | Cu $K\alpha$                                     | Cu $K\alpha$                                                   | Mo $K\alpha$                                       |
| $\mu$ (mm <sup>-1</sup> )                                                             | 2.19                                               | 1.28                                             | 1.89                                                           | 0.20                                               |
| Crystal size (mm)                                                                     | 0.46 × 0.22 ×<br>0.15                              | 0.50 × 0.24 ×<br>0.04                            | 0.49 × 0.30 ×<br>0.04                                          | 0.59 × 0.24 × 0.11                                 |
| Diffractometer                                                                        | Oxford Diffraction Gemini Ultra R                  |                                                  |                                                                |                                                    |
| Absorption correction                                                                 | Analytical                                         |                                                  |                                                                |                                                    |
| $T_{\min}, T_{\max}$                                                                  | 0.508, 0.740                                       | 0.610, 0.955                                     | 0.557, 0.923                                                   | 0.915, 0.984                                       |
| No. of measured, independent and observed reflections                                 | 11121, 3893,<br>3579 [ $I > 2\sigma(I)$ ]          | 9451, 3147, 3017<br>[ $I > 2\sigma(I)$ ]         | 17799, 4379,<br>4054 [ $I > 2\sigma(I)$ ]                      | 40245, 10003, 8710 [ $I > 2\sigma(I)$ ]            |
| $R_{\text{int}}$                                                                      | 0.028                                              | 0.022                                            | 0.025                                                          | 0.039                                              |
| $\theta_{\text{max}}$ (°)                                                             | 67.1                                               | 67.1                                             | 67.0                                                           | 32.9                                               |
| $(\sin \theta/\lambda)_{\text{max}}$ (Å <sup>-1</sup> )                               | 0.597                                              | 0.597                                            | 0.597                                                          | 0.763                                              |
| $R[F^2 > 2\sigma(F^2)], wR(F^2), S$                                                   | 0.063, 0.183,<br>1.09                              | 0.035, 0.098,<br>1.06                            | 0.032, 0.083,<br>1.01                                          | 0.041, 0.096, 1.02                                 |
| No. of reflections                                                                    | 3893                                               | 3147                                             | 4379                                                           | 10003                                              |
| No. of parameters                                                                     | 281                                                | 248                                              | 434                                                            | 494                                                |
| No. of restraints                                                                     | 0                                                  | 1                                                | 121                                                            | 216                                                |
| H-atom treatment                                                                      | constrained                                        |                                                  |                                                                |                                                    |
| $\Delta\rho_{\text{max}}, \Delta\rho_{\text{min}}$ (e <sup>-</sup> ·Å <sup>-3</sup> ) | 0.91, -0.62                                        | 0.26, -0.18                                      | 0.30, -0.34                                                    | 0.30, -0.33                                        |
| Absolute structure                                                                    | –                                                  | Refined as an inversion twin.                    | –                                                              | Flack x determined using 3322 quotients.           |
| Absolute structure parameter                                                          | –                                                  | 0.32 (3)                                         | –                                                              | -0.02 (2)                                          |
| CCDC deposition number                                                                | 2313766                                            | 2313767                                          | 2313768                                                        | 2313769                                            |

|                                                                                                                   | 13                                                                  | 14                                                | 15                                                                                              | 16                                                                                       |
|-------------------------------------------------------------------------------------------------------------------|---------------------------------------------------------------------|---------------------------------------------------|-------------------------------------------------------------------------------------------------|------------------------------------------------------------------------------------------|
| Chemical formula                                                                                                  | C <sub>25</sub> H <sub>18</sub> NP                                  | C <sub>31</sub> H <sub>30</sub> NP                | C <sub>25</sub> H <sub>19</sub> NP·C <sub>2</sub> F <sub>6</sub> NO <sub>4</sub> S <sub>2</sub> | C <sub>25</sub> H <sub>18</sub> BF <sub>3</sub> NP·0.5(CH <sub>2</sub> Cl <sub>2</sub> ) |
| <i>M</i> <sub>r</sub>                                                                                             | 363.37                                                              | 447.53                                            | 644.53                                                                                          | 473.65                                                                                   |
| Crystal system, space group                                                                                       | Orthorhombic, <i>P</i> 2 <sub>1</sub> 2 <sub>1</sub> 2 <sub>1</sub> | Monoclinic, <i>P</i> 2 <sub>1</sub> / <i>n</i>    | Triclinic, <i>P</i> <sup>-</sup> 1                                                              | Monoclinic, <i>P</i> 2 <sub>1</sub> / <i>c</i>                                           |
| Temperature (K)                                                                                                   | 100                                                                 | 100                                               | 100                                                                                             | 100                                                                                      |
| <i>a</i> , <i>b</i> , <i>c</i> (Å)                                                                                | 8.9413 (2),<br>13.6176 (3),<br>15.5673 (4)                          | 9.0484 (3),<br>18.3060 (6),<br>14.4219 (4)        | 8.3718 (3), 17.3368<br>(6), 20.1621 (8)                                                         | 9.5904 (2), 16.0488 (3),<br>14.2154 (3)                                                  |
| α, β, γ (°)                                                                                                       | 90, 90, 90                                                          | 90, 90.4144 (18),<br>90                           | 113.9252 (10), 91.4063<br>(12), 93.9353 (11)                                                    | 90, 101.406 (1), 90                                                                      |
| <i>V</i> (Å <sup>3</sup> )                                                                                        | 1895.46 (8)                                                         | 2388.78 (13)                                      | 2664.18 (17)                                                                                    | 2144.74 (8)                                                                              |
| <i>Z</i>                                                                                                          | 4                                                                   | 4                                                 | 4                                                                                               | 4                                                                                        |
| Radiation type                                                                                                    | Cu <i>K</i> α                                                       | Cu <i>K</i> α                                     | Ag <i>K</i> α, λ = 0.56086 Å                                                                    | Cu <i>K</i> α                                                                            |
| μ (mm <sup>-1</sup> )                                                                                             | 1.33                                                                | 1.15                                              | 0.18                                                                                            | 2.64                                                                                     |
| Crystal size (mm)                                                                                                 | 0.37 × 0.16 ×<br>0.02                                               | 0.20 × 0.12 × 0.02                                | 0.46 × 0.34 × 0.24                                                                              | 0.37 × 0.12 × 0.02                                                                       |
| Diffractometer                                                                                                    | Bruker D8 Venture                                                   |                                                   |                                                                                                 |                                                                                          |
| Absorption correction                                                                                             | Numerical                                                           |                                                   |                                                                                                 |                                                                                          |
| <i>T</i> <sub>min</sub> , <i>T</i> <sub>max</sub>                                                                 | 0.705, 1.000                                                        | 0.76, 0.98                                        | 0.923, 1.000                                                                                    | 0.581, 1.000                                                                             |
| No. of measured,<br>independent and<br>observed reflections                                                       | 46523, 3881,<br>3865 [ <i>I</i> > 2σ( <i>I</i> )]                   | 23060, 4145, 3529<br>[ <i>I</i> > 2σ( <i>I</i> )] | 151281, 16187, 14930<br>[ <i>I</i> > 2σ( <i>I</i> )]                                            | 21498, 3919, 3813 [ <i>I</i> ><br>2σ( <i>I</i> )]                                        |
| <i>R</i> <sub>int</sub>                                                                                           | 0.065                                                               | 0.053                                             | 0.061                                                                                           | 0.037                                                                                    |
| θ <sub>max</sub> (°)                                                                                              | 74.5                                                                | 66.8                                              | 23.6                                                                                            | 68.3                                                                                     |
| (sin θ/λ) <sub>max</sub> (Å <sup>-1</sup> )                                                                       | 0.625                                                               | 0.596                                             | 0.715                                                                                           | 0.603                                                                                    |
| <i>R</i> [ <i>F</i> <sup>2</sup> > 2σ( <i>F</i> <sup>2</sup> )],<br><i>wR</i> ( <i>F</i> <sup>2</sup> ), <i>S</i> | 0.039, 0.101,<br>1.19                                               | 0.078, 0.177,<br>1.15                             | 0.045, 0.125, 1.05                                                                              | 0.045, 0.115, 1.13                                                                       |
| No. of reflections                                                                                                | 3881                                                                | 4145                                              | 16187                                                                                           | 3919                                                                                     |
| No. of parameters                                                                                                 | 245                                                                 | 386                                               | 1029                                                                                            | 317                                                                                      |
| No. of restraints                                                                                                 | 0                                                                   | 201                                               | 404                                                                                             | 26                                                                                       |
| H-atom treatment                                                                                                  | constrained                                                         |                                                   |                                                                                                 |                                                                                          |
| Δρ <sub>max</sub> , Δρ <sub>min</sub> (e·Å <sup>-3</sup> )                                                        | 0.46, -0.26                                                         | 0.52, -0.38                                       | 0.60, -0.38                                                                                     | 0.41, -0.39                                                                              |
| Absolute structure                                                                                                | Refined as an<br>inversion twin.                                    | –                                                 | –                                                                                               | –                                                                                        |
| Absolute structure<br>parameter                                                                                   | 0.14 (3)                                                            | –                                                 | –                                                                                               | –                                                                                        |
| CCDC deposition<br>number                                                                                         | 2313770                                                             | 2347270                                           | 2313771                                                                                         | 2313772                                                                                  |

|                                                                                                                | <b>18</b>                                                                           | <b>20</b>                                                                     |
|----------------------------------------------------------------------------------------------------------------|-------------------------------------------------------------------------------------|-------------------------------------------------------------------------------|
| Chemical formula                                                                                               | C <sub>43</sub> H <sub>18</sub> BF <sub>15</sub> NP·CH <sub>2</sub> Cl <sub>2</sub> | C <sub>44</sub> H <sub>33</sub> NP <sup>+</sup> ·BF <sub>4</sub> <sup>-</sup> |
| <i>M</i> <sub>r</sub>                                                                                          | 960.29                                                                              | 693.49                                                                        |
| Crystal system, space group                                                                                    | Triclinic, <i>P</i> <sup>-</sup> 1                                                  | Orthorhombic, <i>Pca</i> 2 <sub>1</sub>                                       |
| Temperature (K)                                                                                                | 100                                                                                 | 296                                                                           |
| <i>a</i> , <i>b</i> , <i>c</i> (Å)                                                                             | 11.2365 (2), 12.2624 (2), 14.8185 (3)                                               | 12.867 (4), 13.069 (4), 21.505 (6)                                            |
| α, β, γ (°)                                                                                                    | 83.390 (1), 78.060 (1), 74.601 (1)                                                  | 90, 90, 90                                                                    |
| <i>V</i> (Å <sup>3</sup> )                                                                                     | 1921.98 (6)                                                                         | 3616.2 (18)                                                                   |
| <i>Z</i>                                                                                                       | 2                                                                                   | 4                                                                             |
| Radiation type                                                                                                 | Cu <i>K</i> α                                                                       | Cu <i>K</i> α                                                                 |
| μ (mm <sup>-1</sup> )                                                                                          | 2.92                                                                                | 1.11                                                                          |
| Crystal size (mm)                                                                                              | 0.28 × 0.11 × 0.07                                                                  | 0.04 × 0.03 × 0.02                                                            |
| Diffractometer                                                                                                 | Bruker D8 Venture                                                                   |                                                                               |
| Absorption correction                                                                                          | Numerical                                                                           | Multi-scan .                                                                  |
| <i>T</i> <sub>min</sub> , <i>T</i> <sub>max</sub>                                                              | 0.616, 1.000                                                                        | 0.568, 1.000                                                                  |
| No. of measured, independent and observed reflections                                                          | 71257, 7031, 6547 [ <i>I</i> > 2σ( <i>I</i> )]                                      | 3086, 2459, 1312 [ <i>I</i> > 2σ( <i>I</i> )]                                 |
| <i>R</i> <sub>int</sub>                                                                                        | 0.054                                                                               | 0.034                                                                         |
| θ <sub>max</sub> (°)                                                                                           | 68.3                                                                                | 48.2                                                                          |
| (sin θ/λ) <sub>max</sub> (Å <sup>-1</sup> )                                                                    | 0.602                                                                               | 0.484                                                                         |
| <i>R</i> [ <i>F</i> <sup>2</sup> > 2σ( <i>F</i> <sup>2</sup> )], <i>wR</i> ( <i>F</i> <sup>2</sup> ), <i>S</i> | 0.034, 0.090, 1.03                                                                  | 0.079, 0.230, 1.04                                                            |
| No. of reflections                                                                                             | 7031                                                                                | 2459                                                                          |
| No. of parameters                                                                                              | 605                                                                                 | 461                                                                           |
| No. of restraints                                                                                              | 25                                                                                  | 379                                                                           |
| H-atom treatment                                                                                               | constrained                                                                         |                                                                               |
| Δρ <sub>max</sub> , Δρ <sub>min</sub> (e·Å <sup>-3</sup> )                                                     | 0.65, -0.33                                                                         | 0.22, -0.30                                                                   |
| Absolute structure                                                                                             | –                                                                                   | Flack <i>x</i> determined using 330 quotients.                                |
| Absolute structure parameter                                                                                   | –                                                                                   | 0.03 (7)                                                                      |
| CCDC deposition number                                                                                         | 2313773                                                                             | 2313774                                                                       |



## 6. Computational methods

Computations have been carried out using the Jaguar 8.5 pseudospectral program package.<sup>6</sup> All species have been fully geometry optimized, and the Cartesian coordinates are supplied in the next section. PA and MCA values are calculated at the M06-2X/6-311+G(d,p)/M06-2X/6-31+G(d) level as the difference in enthalpy at 298 K between the neutral and the protonated and methylated imine, respectively.

Fluoride ion affinities (FIAs) are estimated at the M06-2X/6-311+G(d,p)/M06-2X/6-31+G(d) level using isodesmic approach with COF<sub>2</sub> anchor point as described by Christie;<sup>7</sup> subtraction of the enthalpies of eq. 2 from eq. 1 providing the absolute FIA (Table S2).

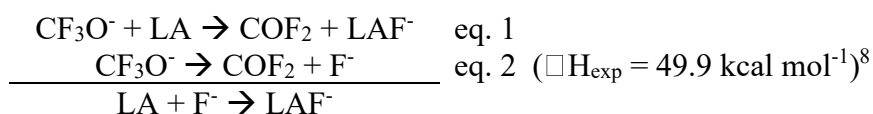

For comparison, FIAs were also computed according to the method described by Greb<sup>9</sup> using the following isodesmic reactions: Me<sub>3</sub>SiF + LA → Me<sub>3</sub>Si<sup>+</sup> + LAF<sup>-</sup> and Me<sub>3</sub>SiF → Me<sub>3</sub>Si<sup>+</sup> + F<sup>-</sup> with the enthalpy value of 227.9 kcal mol<sup>-1</sup> for the second reaction (Table S2, bottom line).

**Table S2.** Computed FIA values (in kcal mol<sup>-1</sup>).

|                               | Cmpd B | 6  | 7  | 8  | 9  | 10 | 11 | 12 | 13 | 14 | Ph <sub>3</sub> P=NPh |
|-------------------------------|--------|----|----|----|----|----|----|----|----|----|-----------------------|
| FIA (COF <sub>2</sub> system) | 60     | 30 | 27 | 30 | 47 | 37 | 45 | 51 | 36 | 38 | 32                    |
| FIA (TMS-system)              | 73     | 43 | 40 | 44 | 60 | 50 | 58 | 64 | 49 | 51 | 45                    |

NBO analysis was performed using the NBO 6.0 program<sup>10</sup> as implemented in Jaguar.

As described by N. Fey,<sup>11</sup> the He<sub>8</sub>\_steric parameters were computed by optimizing the phosphoratriptycene imine geometries at the BP86/6-31+G(d) level, its nitrogen atom constrained to lie at 1.7 or 2.2 Å above the centroid, and perpendicular to the plane, of a helium ring which is constituted by eight helium atoms with a 2.5 Å radius (see Figure S3 for 5). Reported relative energies values correspond to electronic energies obtained at the BP86/6-31G(d) level.

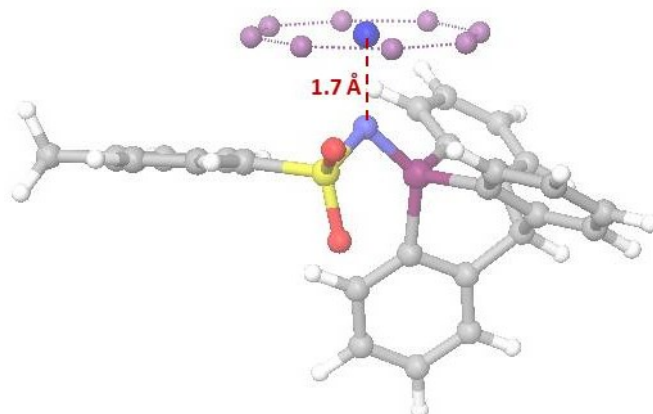

**Figure S3.** Geometric model used for computation of the  $\text{He}_8\_steric$  parameter illustrated for **13**.

Percent buried volume<sup>[12]</sup> and steric contour maps were determined using the SambVca 2.1 application.<sup>[12]</sup> The metal was defined as the center of the sphere and the N atom of the nitrogen ylide derivatives being analyzed was used to define the  $-z$ -axis (Figures S4 and S5). The following default parameters were used for all calculations: atomic radii were the bond radii scaled by 1.17; sphere radius = 3.5 Å, mesh spacing = 0.1 Å, and H atoms were excluded from the calculations.

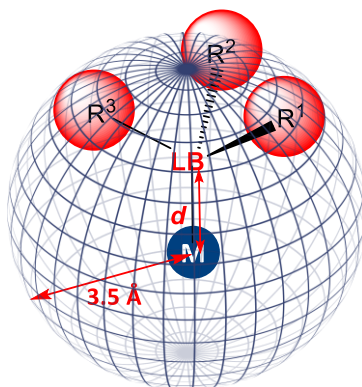

**Figure S4.** Description of the method applied to calculate the  $\%V_{bur}$  parameter.

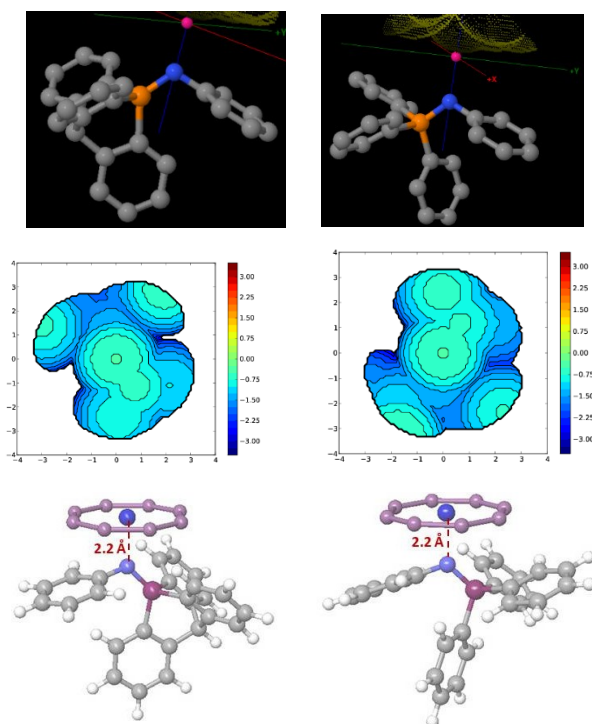

**Figure S5.** Steric parameters calculations for TripP=NPh **13** (left) and for its analogue Ph<sub>3</sub>P=NPh (right). Top: Geometric models used for computation of their buried volumes; Middle: topographic steric maps with a M-N distance of 1.7 Å. Bottom: geometric models used for computation of their  $\text{He}_8\_steric$  parameters.

**Table S3.** Computed steric  $\text{He}_8\text{_{steric}}$  parameters ( $\text{kcal mol}^{-1}$ ) and buried volume ( $\%V_{\text{bur}}$ ) at two different N-centroid distances for phosphatriptycene imines **9-14** and for the reference triphenylphosphine-iminophosphorane  $\text{Ph}_3\text{P}=\text{NPh}$ .

| Steric parameters                    | <b>9</b> | <b>10</b> | <b>11</b> | <b>12</b> | <b>13</b> | <b>14</b> | <b><math>\text{Ph}_3\text{P}=\text{NPh}</math></b> |
|--------------------------------------|----------|-----------|-----------|-----------|-----------|-----------|----------------------------------------------------|
| $\text{He}_8\text{_{steric}}$ 1.70 Å | 42       | 50        | 43        | 51        | 25        | 35        | 24                                                 |
| $\text{He}_8\text{_{steric}}$ 2.20 Å | 22       | 29        | 23        | 28        | 13        | 16        | 15                                                 |
| $\%V_{\text{bur}}^a$ 1.70 Å          | 32.8     | 34.6      | 31.3      | 35.7      | 32.1      | 35.2      | 32.3                                               |
| $\%V_{\text{bur}}^a$ 2.20 Å          | 28.5     | 28.4      | 28.4      | 30.4      | 26.2      | 28.1      | 26.0                                               |

<sup>a</sup>  $\%V_{\text{bur}}$  computed using the SambVca with the solid-state input geometries. Hydrogen atoms are excluded, and sphere radius set at 3.5 Å. N-centroid distances of 1.7 and 2.2 Å. Atomic radii default, scaled bond radii of 1.17 Å, see the ESI for detailed calculations.

The difference in FIA between **13** and  $\text{Ph}_3\text{P}=\text{NPh}$  was analyzed through the distortion/Interaction-activation strain model of Houk and Bickelhaupt (Table S4).<sup>13</sup>

**Table S4.** Fluoride anion affinities (FIA), distortion ( $\Delta E_{\text{strain}}$ ) and interaction ( $\Delta E_{\text{int}}$ ) energies (in  $\text{kcal.mol}^{-1}$ ) calculated at the M06-2X/6-311+G(d,p) level.

|                            | <b>13</b> | <b><math>\text{Ph}_3\text{P}=\text{NPh}</math></b> |
|----------------------------|-----------|----------------------------------------------------|
| FIA                        | 36        | 32                                                 |
| $\Delta E_{\text{strain}}$ | 27.9      | 32.5                                               |
| $\Delta E_{\text{int}}$    | -73.2     | -71.9                                              |

These results indicate that the slight enhancement of Lewis acidity at the phosphorus atom (as evidenced by FIA) with geometric constraints is mainly due to a lower distortion energy. The energy necessary for the triptycene structure in **13** to adopt the trigonal bipyramidal geometry is indeed lower (by  $4.6 \text{ kcal mol}^{-1}$ ) than the one required for  $\text{Ph}_3\text{P}=\text{NPh}$ .

## 7. Structures and energies

He8\_ring

$E(\text{BP86/6-31G}^*) = -23.15522221938$

He1 2.4999755124 0.0000000000 0.0000000000  
He2 -2.4999755124 0.0000000000 0.0000000000  
He3 0.0000000000 2.4999755124 0.0000000000  
He4 0.0000000000 -2.4999755124 0.0000000000  
He5 1.7677496376 1.7677496376 0.0000000000  
He6 -1.7677496376 -1.7677496376 0.0000000000  
He7 -1.7677496376 1.7677496376 0.0000000000  
He8 1.7677496376 -1.7677496376 0.0000000000  
X9 -0.0000500000 0.0000125000 0.0000000000

**6**

$E(\text{M06-2X/6-311+G}^{**}) = -1148.32482818063$

$H(\text{M06-2X/6-31+G}^*) = -1148.11876483316$

|    |               |               |              |
|----|---------------|---------------|--------------|
| C1 | -2.4910593056 | 1.2650121164  | 6.9598985999 |
| C2 | -2.7924019883 | 2.5580860312  | 6.5210027336 |
| C3 | -1.7840331328 | 3.5020298788  | 6.3434013783 |
| C4 | -0.4540847071 | 3.1622031287  | 6.6035955862 |
| C5 | -0.1612843976 | 1.8764989488  | 7.0384642670 |
| C6 | 1.4257102944  | -0.2795257210 | 6.4551070269 |
| C7 | 2.3941735235  | -0.7078581038 | 5.5570560396 |
| C8 | 2.2024718735  | -1.9147811979 | 4.8798211126 |
| C9 | 1.0541882907  | -2.6684775717 | 5.1096188573 |

|     |               |               |               |
|-----|---------------|---------------|---------------|
| C10 | 0.0826654072  | -2.2317651383 | 6.0156454394  |
| C11 | 0.2655204934  | -1.0330085665 | 6.6933994436  |
| C12 | -1.1712260650 | 0.9187618527  | 7.2210091304  |
| H13 | -3.2847665606 | 0.5345512816  | 7.0963234967  |
| H14 | -3.8247991899 | 2.8269244639  | 6.3174828816  |
| H15 | -2.0312683525 | 4.5028020263  | 6.0026910951  |
| H16 | 0.3482675915  | 3.8831188747  | 6.4709581965  |
| H17 | 3.2826453972  | -0.1040496451 | 5.3926204974  |
| H18 | 2.9496306430  | -2.2652082893 | 4.1743390664  |
| H19 | 0.9094628420  | -3.6061771635 | 4.5811210343  |
| H20 | -0.8106693183 | -2.8267119279 | 6.1893910964  |
| C21 | 0.3185669095  | -0.6882934901 | 11.3992333896 |
| C22 | 1.4401160394  | 0.1371787753  | 11.3977224485 |
| C23 | 1.8501904823  | 0.7577460743  | 10.2149619309 |
| C24 | 1.1239421931  | 0.5370740664  | 9.0524580298  |
| C25 | -0.0077911651 | -0.2935851059 | 9.0445868744  |
| C26 | -0.4084603349 | -0.9066353110 | 10.2249240083 |
| H27 | 0.0030487608  | -1.1687297117 | 12.3207190360 |
| H28 | 1.9964771096  | 0.2989416865  | 12.3158622725 |
| H29 | 2.7224609913  | 1.4055466911  | 10.1920519758 |
| H30 | -1.2828343986 | -1.5525203388 | 10.2348003014 |
| C31 | -0.7280326847 | -0.4621602838 | 7.7060282031  |
| H32 | -1.5904066693 | -1.1260813400 | 7.8147197961  |
| P33 | 1.5023566499  | 1.2552431333  | 7.4259004056  |
| O34 | 2.6771552843  | 2.1609547009  | 7.2777374186  |

## 6-H<sup>+</sup>

$$E(\text{M06-2X/6-311+G**}) = -1148.68633374365$$

$$H(\text{M06-2X/6-31+G*}) = -1148.47394069304$$

|     |               |               |               |
|-----|---------------|---------------|---------------|
| C1  | -2.4674799915 | 1.2863452009  | 6.9514493984  |
| C2  | -2.7607602135 | 2.5812272148  | 6.5123991166  |
| C3  | -1.7537575633 | 3.5276457661  | 6.3358983945  |
| C4  | -0.4240896539 | 3.1948036760  | 6.5970479214  |
| C5  | -0.1489133516 | 1.9044074553  | 7.0327412465  |
| C6  | 1.4538679132  | -0.2983378941 | 6.4401322997  |
| C7  | 2.4180467219  | -0.7194696241 | 5.5317320807  |
| C8  | 2.2110358781  | -1.9239076667 | 4.8585388518  |
| C9  | 1.0596444434  | -2.6700704908 | 5.0992587171  |
| C10 | 0.0929208594  | -2.2316951010 | 6.0092479371  |
| C11 | 0.2822615247  | -1.0372040284 | 6.6904114689  |
| C12 | -1.1515639222 | 0.9340169605  | 7.2170832182  |
| H13 | -3.2644784111 | 0.5602764435  | 7.0840666451  |
| H14 | -3.7914574082 | 2.8514912517  | 6.3061303848  |
| H15 | -2.0009614315 | 4.5271324464  | 5.9945713865  |
| H16 | 0.3717219116  | 3.9213559494  | 6.4643826025  |
| H17 | 3.3075913401  | -0.1271632883 | 5.3362158350  |
| H18 | 2.9480464651  | -2.2754394601 | 4.1444825992  |
| H19 | 0.9069145883  | -3.6052387200 | 4.5701334627  |
| H20 | -0.8028729512 | -2.8215821335 | 6.1814444534  |
| C21 | 0.3100721784  | -0.6917988444 | 11.4082531343 |
| C22 | 1.4311682861  | 0.1347606285  | 11.4254071054 |
| C23 | 1.8580068899  | 0.7596641132  | 10.2531794662 |
| C24 | 1.1415906574  | 0.5280271074  | 9.0848814470  |
| C25 | 0.0029665759  | -0.2985649692 | 9.0516121476  |
| C26 | -0.4079834237 | -0.9089425607 | 10.2284433149 |
| H27 | -0.0154242758 | -1.1724409749 | 12.3252765283 |
| H28 | 1.9728215356  | 0.2980084600  | 12.3509365040 |
| H29 | 2.7231627615  | 1.4166581878  | 10.2639942796 |

|     |               |               |               |
|-----|---------------|---------------|---------------|
| H30 | -1.2844067786 | -1.5503952568 | 10.2325827617 |
| C31 | -0.7110463910 | -0.4545535968 | 7.7029938901  |
| H32 | -1.5767236474 | -1.1121165179 | 7.8056815369  |
| P33 | 1.4230848542  | 1.1793968455  | 7.4448889568  |
| O34 | 2.6129934738  | 2.2161490001  | 7.2642799392  |
| H35 | 3.5201943309  | 1.9114410867  | 7.4390885132  |

### 6-Me<sup>+</sup>

E(M06-2X/6-311+G\*\*) = -1187.97702531867

H(M06-2X/6-31+G\*) = -1187.75977845225

|     |               |               |              |
|-----|---------------|---------------|--------------|
| C1  | -2.4630657348 | 1.2963705743  | 6.9518059990 |
| C2  | -2.7509696306 | 2.5868733630  | 6.4964620240 |
| C3  | -1.7394126340 | 3.5255887020  | 6.3058217360 |
| C4  | -0.4111652052 | 3.1880499360  | 6.5690269412 |
| C5  | -0.1406312209 | 1.9022464663  | 7.0206356628 |
| C6  | 1.4431972806  | -0.3183152342 | 6.4522293791 |
| C7  | 2.3954903809  | -0.7507220585 | 5.5360063099 |
| C8  | 2.1738672148  | -1.9554160816 | 4.8679294445 |
| C9  | 1.0186851665  | -2.6917884353 | 5.1201853222 |
| C10 | 0.0625033636  | -2.2419189962 | 6.0356569357 |
| C11 | 0.2676808770  | -1.0468829561 | 6.7116072593 |
| C12 | -1.1485316639 | 0.9397975680  | 7.2195279144 |
| H13 | -3.2636103642 | 0.5761747121  | 7.0955024845 |
| H14 | -3.7808319754 | 2.8593977604  | 6.2887701807 |
| H15 | -1.9818806322 | 4.5218944039  | 5.9519781688 |
| H16 | 0.3886589282  | 3.9080250319  | 6.4255134322 |
| H17 | 3.2878590624  | -0.1655889110 | 5.3325835175 |
| H18 | 2.9018719742  | -2.3148676865 | 4.1485085451 |
| H19 | 0.8539476946  | -3.6270879209 | 4.5948044981 |

|     |               |               |               |
|-----|---------------|---------------|---------------|
| H20 | -0.8379049751 | -2.8226164219 | 6.2152257186  |
| C21 | 0.3069571725  | -0.6444782567 | 11.4270792822 |
| C22 | 1.4324665651  | 0.1764481377  | 11.4324116455 |
| C23 | 1.8612739840  | 0.7825784022  | 10.2510575906 |
| C24 | 1.1436582080  | 0.5395972381  | 9.0850891860  |
| C25 | 0.0003165258  | -0.2803183459 | 9.0655879782  |
| C26 | -0.4132725793 | -0.8731995314 | 10.2507975974 |
| H27 | -0.0200265899 | -1.1115735736 | 12.3505786647 |
| H28 | 1.9752855291  | 0.3496043815  | 12.3554976211 |
| H29 | 2.7308488916  | 1.4337545268  | 10.2514973039 |
| H30 | -1.2940313547 | -1.5090737326 | 10.2642410132 |
| C31 | -0.7176340809 | -0.4464608253 | 7.7210812691  |
| H32 | -1.5889400330 | -1.0951385603 | 7.8330779257  |
| P33 | 1.4324259555  | 1.1767070429  | 7.4371195732  |
| O34 | 2.6401726658  | 2.1722152257  | 7.2504118005  |
| C35 | 4.0147366810  | 1.7907015106  | 7.5290728416  |
| H36 | 4.3874000241  | 2.4731485044  | 8.2918041590  |
| H37 | 4.0746162006  | 0.7561123564  | 7.8786539639  |
| H38 | 4.5751684572  | 1.9136176133  | 6.6032713248  |

**6-F**

$$E(M06-2X/6-311+G^{**}) = -1248.2272147024$$

$$H(M06-2X/6-31+G^*) = -1247.99033663496$$

|    |              |               |              |
|----|--------------|---------------|--------------|
| C1 | 0.0345627362 | -1.5787176455 | 6.3886142816 |
| C2 | 0.0286920239 | -1.5593569704 | 4.9931073006 |
| C3 | 0.2787209381 | -0.3671678544 | 4.3142297644 |
| C4 | 0.5471580853 | 0.8005565466  | 5.0294563258 |
| C5 | 0.5358362181 | 0.7892786858  | 6.4216639746 |



|     |               |               |               |
|-----|---------------|---------------|---------------|
| C6  | 1.8957471258  | 1.4885730961  | 8.8001132616  |
| C7  | 3.0266020088  | 2.0736445869  | 9.3634204023  |
| C8  | 3.7405192004  | 1.4083270042  | 10.3608469937 |
| C9  | 3.3408537238  | 0.1380289697  | 10.7748288031 |
| C10 | 2.2184273100  | -0.4596868658 | 10.1997036839 |
| C11 | 1.4874835040  | 0.2143415861  | 9.2228070599  |
| C12 | 0.2757150470  | -0.4079966328 | 7.1057564846  |
| H13 | -0.1615804877 | -2.5065705173 | 6.9235410413  |
| H14 | -0.1700900311 | -2.4734197381 | 4.4387044870  |
| H15 | 0.2795340392  | -0.3506997931 | 3.2268700339  |
| H16 | 0.7846503752  | 1.7275260710  | 4.5141395646  |
| H17 | 3.3507222927  | 3.0453759441  | 9.0003876961  |
| H18 | 4.6178729816  | 1.8734203035  | 10.8041486312 |
| H19 | 3.9016158533  | -0.3886701820 | 11.5433545963 |
| H20 | 1.9019966045  | -1.4509903918 | 10.5203151032 |
| C21 | -2.9959769072 | 1.2666536054  | 9.9821846801  |
| C22 | -2.8149553209 | 2.5616422549  | 9.4994858173  |
| C23 | -1.6753328463 | 2.8844101823  | 8.7526817196  |
| C24 | -0.7083890574 | 1.9195361401  | 8.4822080250  |
| C25 | -0.9071721006 | 0.6242625742  | 8.9757321890  |
| C26 | -2.0334325485 | 0.2868757231  | 9.7184427385  |
| H27 | -3.8817503964 | 1.0162528388  | 10.5618730788 |
| H28 | -3.5650184758 | 3.3230590702  | 9.7054362496  |
| H29 | -1.5140974544 | 3.8876868079  | 8.3657621369  |
| H30 | -2.1644642928 | -0.7288467565 | 10.0904879878 |
| C31 | 0.2068131753  | -0.3532696155 | 8.6257786278  |
| H32 | 0.0063327975  | -1.3507256997 | 9.0337312754  |
| O33 | 0.6026005581  | 3.7462174033  | 7.1932080957  |
| P34 | 0.9082747924  | 2.2850302464  | 7.4497981951  |
| F35 | 2.4348828513  | 2.3505889951  | 6.5584132145  |

7-

$$E(M06-2X/6-311+G^{**}) = -1471.29670755109$$

$$H(M06-2X/6-31+G^*) = -1471.08176633123$$

|     |               |               |               |
|-----|---------------|---------------|---------------|
| C1  | -2.4762705389 | 1.2703344722  | 6.9729009249  |
| C2  | -2.7797373722 | 2.5629366532  | 6.5353392672  |
| C3  | -1.7722371485 | 3.5077982842  | 6.3585965914  |
| C4  | -0.4418834386 | 3.1694093858  | 6.6183205920  |
| C5  | -0.1486202822 | 1.8846021074  | 7.0518044569  |
| C6  | 1.4401371574  | -0.2743557221 | 6.4691097031  |
| C7  | 2.4082817642  | -0.7034507380 | 5.5729133543  |
| C8  | 2.2154808544  | -1.9105425961 | 4.8964522802  |
| C9  | 1.0664750978  | -2.6630114132 | 5.1259382968  |
| C10 | 0.0956147568  | -2.2241218025 | 6.0310049965  |
| C11 | 0.2789526544  | -1.0249008783 | 6.7081649031  |
| C12 | -1.1560158054 | 0.9249794382  | 7.2339093336  |
| H13 | -3.2682883777 | 0.5379954842  | 7.1092774787  |
| H14 | -3.8125940355 | 2.8303605352  | 6.3325082790  |
| H15 | -2.0198173856 | 4.5087903483  | 6.0190813808  |
| H16 | 0.3614584844  | 3.8903750324  | 6.4874791760  |
| H17 | 3.2974158844  | -0.0991750205 | 5.4099600360  |
| H18 | 2.9630884394  | -2.2614438132 | 4.1918190278  |
| H19 | 0.9206741462  | -3.6009768128 | 4.5983039500  |
| H20 | -0.7988440887 | -2.8172065433 | 6.2054133678  |
| C21 | 0.3255895057  | -0.6883977682 | 11.4103213623 |
| C22 | 1.4474191076  | 0.1364858860  | 11.4120880866 |
| C23 | 1.8595243023  | 0.7598652395  | 10.2316318907 |
| C24 | 1.1348022604  | 0.5415981048  | 9.0689145457  |
| C25 | 0.0028593775  | -0.2876742253 | 9.0557946809  |

|     |               |               |               |
|-----|---------------|---------------|---------------|
| C26 | -0.3996113525 | -0.9030608736 | 10.2345885922 |
| H27 | 0.0085251800  | -1.1712161228 | 12.3300104216 |
| H28 | 2.0030075371  | 0.2959443060  | 12.3310231095 |
| H29 | 2.7321372172  | 1.4081293528  | 10.2091051796 |
| H30 | -1.2743920310 | -1.5484425605 | 10.2408267481 |
| C31 | -0.7154085386 | -0.4550926529 | 7.7179513727  |
| H32 | -1.5781319850 | -1.1186671897 | 7.8250539957  |
| P33 | 1.5236147457  | 1.2675168326  | 7.4407396233  |
| S34 | 3.0605029067  | 2.4502857380  | 7.2488919269  |

### 7-H<sup>+</sup>

$$E(M06-2X/6-311+G^{**}) = -1471.64296549335$$

$$H(M06-2X/6-31+G^*) = -1471.42370168184$$

|     |               |               |              |
|-----|---------------|---------------|--------------|
| C1  | -2.4520367697 | 1.2750008902  | 6.9667105741 |
| C2  | -2.7568976263 | 2.5663933955  | 6.5266925780 |
| C3  | -1.7568832713 | 3.5192350982  | 6.3496463833 |
| C4  | -0.4255866171 | 3.1938719074  | 6.6114096132 |
| C5  | -0.1370688114 | 1.9070791979  | 7.0481357457 |
| C6  | 1.4690740295  | -0.2935468524 | 6.4532231366 |
| C7  | 2.4312764731  | -0.7082067510 | 5.5415694532 |
| C8  | 2.2252904023  | -1.9112465199 | 4.8650157634 |
| C9  | 1.0768858187  | -2.6610199377 | 5.1073449506 |
| C10 | 0.1121523950  | -2.2273347274 | 6.0216402238 |
| C11 | 0.3005369522  | -1.0341245257 | 6.7059159931 |
| C12 | -1.1336038535 | 0.9308569476  | 7.2331878348 |
| H13 | -3.2429452599 | 0.5422480554  | 7.0998057380 |
| H14 | -3.7896531070 | 2.8283390219  | 6.3202376713 |
| H15 | -2.0095064342 | 4.5171056180  | 6.0075819661 |

|     |               |               |               |
|-----|---------------|---------------|---------------|
| H16 | 0.3583177521  | 3.9336861831  | 6.4744240234  |
| H17 | 3.3171664690  | -0.1097597382 | 5.3468470730  |
| H18 | 2.9608785498  | -2.2583025138 | 4.1472790416  |
| H19 | 0.9244142916  | -3.5949805885 | 4.5760146185  |
| H20 | -0.7820416682 | -2.8195143326 | 6.1949540573  |
| C21 | 0.3210648909  | -0.6878238217 | 11.4248175184 |
| C22 | 1.4382174315  | 0.1435992955  | 11.4444953472 |
| C23 | 1.8656765832  | 0.7690672927  | 10.2725628852 |
| C24 | 1.1530396063  | 0.5336940140  | 9.1040167802  |
| C25 | 0.0187893513  | -0.2970015905 | 9.0663518499  |
| C26 | -0.3924614811 | -0.9085862317 | 10.2429707459 |
| H27 | -0.0051681108 | -1.1693813079 | 12.3410783883 |
| H28 | 1.9766075656  | 0.3104187161  | 12.3713080946 |
| H29 | 2.7275129800  | 1.4308658346  | 10.2823366624 |
| H30 | -1.2662326028 | -1.5538552197 | 10.2445642070 |
| C31 | -0.6920316686 | -0.4554890651 | 7.7188524564  |
| H32 | -1.5576522201 | -1.1137245954 | 7.8210003659  |
| P33 | 1.4575313522  | 1.1942956536  | 7.4609273247  |
| S34 | 3.0267688612  | 2.5117543655  | 7.2365686962  |
| H35 | 3.9439907627  | 1.6038125195  | 7.6274505276  |

### 7-Me<sup>+</sup>

E(M06-2X/6-311+G\*\*) = -1510.948912186

H(M06-2X/6-31+G\*) = -1510.72242911044

|    |               |              |              |
|----|---------------|--------------|--------------|
| C1 | -2.4394065452 | 1.2721539612 | 6.9642428158 |
| C2 | -2.7361176777 | 2.5649165206 | 6.5218125585 |
| C3 | -1.7305406549 | 3.5118628720 | 6.3467192453 |
| C4 | -0.4015171777 | 3.1792540812 | 6.6129019687 |
| C5 | -0.1212932575 | 1.8914911899 | 7.0514165950 |

|     |               |               |               |
|-----|---------------|---------------|---------------|
| C6  | 1.4620506897  | -0.3108160822 | 6.4495572968  |
| C7  | 2.3904814882  | -0.7052859369 | 5.4933041400  |
| C8  | 2.1635784122  | -1.8926190308 | 4.7966233285  |
| C9  | 1.0231699736  | -2.6486680067 | 5.0578260350  |
| C10 | 0.0834046393  | -2.2284620267 | 6.0028314315  |
| C11 | 0.2944417212  | -1.0499492049 | 6.7067107455  |
| C12 | -1.1237711290 | 0.9208352976  | 7.2346455505  |
| H13 | -3.2351005785 | 0.5442354023  | 7.0958321889  |
| H14 | -3.7668669036 | 2.8321441897  | 6.3120636763  |
| H15 | -1.9766278097 | 4.5108023239  | 6.0027694639  |
| H16 | 0.3881552587  | 3.9131581482  | 6.4780724796  |
| H17 | 3.2622078743  | -0.0962548837 | 5.2704392299  |
| H18 | 2.8746916573  | -2.2215486565 | 4.0462633857  |
| H19 | 0.8540215106  | -3.5711401652 | 4.5116452336  |
| H20 | -0.8129698271 | -2.8158516379 | 6.1811880970  |
| C21 | 0.2653231092  | -0.6591248895 | 11.4418337520 |
| C22 | 1.3712294647  | 0.1875378833  | 11.4708075289 |
| C23 | 1.8195448644  | 0.7924305948  | 10.2960899743 |
| C24 | 1.1447366037  | 0.5203008738  | 9.1116581347  |
| C25 | 0.0127021968  | -0.3119126204 | 9.0706401447  |
| C26 | -0.4211322040 | -0.9043652959 | 10.2495734148 |
| H27 | -0.0771944799 | -1.1263435641 | 12.3595995704 |
| H28 | 1.8823962026  | 0.3836024092  | 12.4073426674 |
| H29 | 2.6621352497  | 1.4780213496  | 10.3187560967 |
| H30 | -1.2953558837 | -1.5494100053 | 10.2448855148 |
| C31 | -0.6920649217 | -0.4696001339 | 7.7218448938  |
| H32 | -1.5627497652 | -1.1216257861 | 7.8216983461  |
| P33 | 1.4757989258  | 1.1767914907  | 7.4664965936  |
| S34 | 3.0557067394  | 2.4700863035  | 7.2517996479  |
| C35 | 4.4373985210  | 1.3681603550  | 7.7595544306  |
| H36 | 5.3284374048  | 1.9927296626  | 7.6767138724  |
| H37 | 4.3227508172  | 1.0370402992  | 8.7907578038  |

H38 4.5307899512 0.5144505880 7.0898030709

7-F

$E(M06-2X/6-311+G^{**}) = -1571.19531232547$

$H(M06-2X/6-31+G^*) = -1510.72242911044$

|     |               |               |               |
|-----|---------------|---------------|---------------|
| C1  | 0.0086485471  | -1.5762104451 | 6.3906475606  |
| C2  | -0.0060177845 | -1.5547961221 | 4.9956586214  |
| C3  | 0.2314759671  | -0.3607116977 | 4.3148406943  |
| C4  | 0.4978343344  | 0.8090074430  | 5.0267650228  |
| C5  | 0.4971880744  | 0.7903848008  | 6.4176894454  |
| C6  | 1.8677361803  | 1.4974455342  | 8.8159665116  |
| C7  | 2.9891215152  | 2.0932079894  | 9.3844764016  |
| C8  | 3.7016260373  | 1.4265207754  | 10.3814638228 |
| C9  | 3.3083695896  | 0.1510762513  | 10.7868973816 |
| C10 | 2.1927831937  | -0.4524879639 | 10.2056713677 |
| C11 | 1.4633396549  | 0.2209289659  | 9.2270883530  |
| C12 | 0.2499880431  | -0.4042324250 | 7.1059806769  |
| H13 | -0.1800619017 | -2.5048492464 | 6.9265237992  |
| H14 | -0.2031448427 | -2.4694858935 | 4.4419316873  |
| H15 | 0.2236168518  | -0.3442647946 | 3.2278140244  |
| H16 | 0.7235222736  | 1.7406669566  | 4.5142775785  |
| H17 | 3.3029454911  | 3.0703060847  | 9.0263347983  |
| H18 | 4.5730809621  | 1.8951808814  | 10.8318151391 |
| H19 | 3.8692483385  | -0.3748866355 | 11.5556391842 |
| H20 | 1.8803415898  | -1.4463397379 | 10.5216126575 |
| C21 | -3.0151840013 | 1.2497302397  | 9.9941824993  |
| C22 | -2.8518778411 | 2.5480998538  | 9.5199469856  |
| C23 | -1.7222549676 | 2.8930415841  | 8.7686633272  |
| C24 | -0.7373415422 | 1.9512434224  | 8.4776337594  |

|     |               |               |               |
|-----|---------------|---------------|---------------|
| C25 | -0.9215558710 | 0.6472940917  | 8.9668435027  |
| C26 | -2.0389947238 | 0.2905245568  | 9.7140331217  |
| H27 | -3.8929562619 | 0.9812668243  | 10.5776176376 |
| H28 | -3.6073288534 | 3.3013965604  | 9.7338670673  |
| H29 | -1.5931675681 | 3.9053561345  | 8.3967360810  |
| H30 | -2.1487917905 | -0.7307775793 | 10.0768705835 |
| C31 | 0.1847054560  | -0.3395633909 | 8.6238717257  |
| H32 | -0.0277938537 | -1.3317986629 | 9.0378293733  |
| S33 | 0.6265807995  | 4.2199622636  | 7.0198644435  |
| P34 | 0.9069151574  | 2.2729076700  | 7.4410550332  |
| F35 | 2.4561182703  | 2.2533372070  | 6.5638091498  |

## 8

$$E(M06-2X/6-311+G^{**}) = -3474.73553251064$$

$$H(M06-2X/6-31+G^*) = -3474.54441872672$$

|     |               |               |              |
|-----|---------------|---------------|--------------|
| C1  | -2.4601420079 | 1.2718332813  | 7.0031868879 |
| C2  | -2.7637137958 | 2.5634988989  | 6.5627818880 |
| C3  | -1.7563693467 | 3.5083888645  | 6.3841196647 |
| C4  | -0.4258978588 | 3.1713052263  | 6.6453254508 |
| C5  | -0.1332728643 | 1.8875008683  | 7.0823507837 |
| C6  | 1.4559447911  | -0.2718377154 | 6.4995806302 |
| C7  | 2.4224904667  | -0.6991682822 | 5.6007068905 |
| C8  | 2.2272333819  | -1.9048566409 | 4.9222258935 |
| C9  | 1.0779673603  | -2.6570106606 | 5.1523385029 |
| C10 | 0.1088859724  | -2.2192071308 | 6.0598921729 |
| C11 | 0.2942734801  | -1.0213209621 | 6.7393968184 |
| C12 | -1.1396800060 | 0.9271894648  | 7.2655687008 |
| H13 | -3.2520081488 | 0.5397006366  | 7.1402287847 |
| H14 | -3.7964153662 | 2.8300916601  | 6.3588808366 |

|      |               |               |               |
|------|---------------|---------------|---------------|
| H15  | -2.0041216566 | 4.5082046256  | 6.0418602253  |
| H16  | 0.3778244042  | 3.8914331411  | 6.5130171318  |
| H17  | 3.3111735677  | -0.0944197863 | 5.4375737488  |
| H18  | 2.9729300470  | -2.2548315492 | 4.2154084663  |
| H19  | 0.9304287800  | -3.5935779829 | 4.6230303555  |
| H20  | -0.7857352286 | -2.8117953259 | 6.2340292772  |
| C21  | 0.3378013502  | -0.6867541931 | 11.4425621656 |
| C22  | 1.4592697605  | 0.1389413354  | 11.4458448094 |
| C23  | 1.8728531035  | 0.7625750155  | 10.2659068472 |
| C24  | 1.1490653758  | 0.5433105945  | 9.1027563584  |
| C25  | 0.0174351862  | -0.2861564833 | 9.0877275120  |
| C26  | -0.3859437339 | -0.9020930011 | 10.2662144725 |
| H27  | 0.0198607737  | -1.1696261168 | 12.3616804141 |
| H28  | 2.0134766786  | 0.2989096797  | 12.3652390392 |
| H29  | 2.7448436543  | 1.4114106187  | 10.2430320197 |
| H30  | -1.2603342291 | -1.5480587333 | 10.2715814806 |
| C31  | -0.6987222090 | -0.4521568402 | 7.7498483790  |
| H32  | -1.5613717853 | -1.1157817789 | 7.8556938748  |
| P33  | 1.5409595440  | 1.2710465188  | 7.4732306426  |
| Se34 | 3.1950252368  | 2.5436599169  | 7.2702682575  |

### 8-H<sup>+</sup>

$$E(\text{M06-2X/6-311+G**}) = -3475.07915502396$$

$$H(\text{M06-2X/6-31+G*}) = -3474.88538530689$$

|    |               |              |              |
|----|---------------|--------------|--------------|
| C1 | -2.4395453324 | 1.2537627474 | 7.0025097054 |
| C2 | -2.7520389374 | 2.5432924606 | 6.5625225606 |
| C3 | -1.7569562852 | 3.5012647926 | 6.3843939128 |
| C4 | -0.4241623760 | 3.1818963851 | 6.6452694697 |
| C5 | -0.1270537799 | 1.8968612771 | 7.0815307539 |



|      |               |               |               |
|------|---------------|---------------|---------------|
| C6   | 1.4893230349  | -0.2947337125 | 6.4847998351  |
| C7   | 2.4550938765  | -0.7088746730 | 5.5767583265  |
| C8   | 2.2554203543  | -1.9147532852 | 4.9032669658  |
| C9   | 1.1098465195  | -2.6688768597 | 5.1459712994  |
| C10  | 0.1424792599  | -2.2367880663 | 6.0582296268  |
| C11  | 0.3241957917  | -1.0401204778 | 6.7390829751  |
| C12  | -1.1185671509 | 0.9159254540  | 7.2673405329  |
| H13  | -3.2260295879 | 0.5166558923  | 7.1372971064  |
| H14  | -3.7862716408 | 2.7995035255  | 6.3571612181  |
| H15  | -2.0148916852 | 4.4975656931  | 6.0423619099  |
| H16  | 0.3548437522  | 3.9267240438  | 6.5077352879  |
| H17  | 3.3399664764  | -0.1081072945 | 5.3856867702  |
| H18  | 2.9938792196  | -2.2612539283 | 4.1885016966  |
| H19  | 0.9619701221  | -3.6051401750 | 4.6177280074  |
| H20  | -0.7487213742 | -2.8326596375 | 6.2337502913  |
| C21  | 0.3504998429  | -0.6997365945 | 11.4548334467 |
| C22  | 1.4649141404  | 0.1354103190  | 11.4729184965 |
| C23  | 1.8866559330  | 0.7645201766  | 10.3009556720 |
| C24  | 1.1717785828  | 0.5299793115  | 9.1338885912  |
| C25  | 0.0408877512  | -0.3052178669 | 9.0973891886  |
| C26  | -0.3650903070 | -0.9209178299 | 10.2741969402 |
| H27  | 0.0284268488  | -1.1845795814 | 12.3706313561 |
| H28  | 2.0056627457  | 0.3013137839  | 12.3982613898 |
| H29  | 2.7472529600  | 1.4271322081  | 10.3069818315 |
| H30  | -1.2358606631 | -1.5700870858 | 10.2761798392 |
| C31  | -0.6706495792 | -0.4672331058 | 7.7517593549  |
| H32  | -1.5328669953 | -1.1300017978 | 7.8541594642  |
| P33  | 1.4807792400  | 1.1995152354  | 7.4904841430  |
| Se34 | 3.1603308606  | 2.6092820356  | 7.2548765973  |
| H35  | 4.1065971427  | 1.5615552239  | 7.6937900207  |

**8-Me<sup>+</sup>**

E(M06-2X/6-311+G\*\*) = -3514.39286190159

H(M06-2X/6-31+G\*) = -3514.18482557093

|     |               |               |               |
|-----|---------------|---------------|---------------|
| C1  | -2.4348408382 | 1.2564291188  | 6.9994509610  |
| C2  | -2.7430205970 | 2.5465774214  | 6.5571972920  |
| C3  | -1.7449843151 | 3.5014478399  | 6.3806253370  |
| C4  | -0.4130966671 | 3.1785141274  | 6.6450523534  |
| C5  | -0.1206290906 | 1.8932542685  | 7.0831098453  |
| C6  | 1.4768167712  | -0.2986514659 | 6.4817506485  |
| C7  | 2.4114865971  | -0.6921777970 | 5.5315393269  |
| C8  | 2.1953583614  | -1.8848044802 | 4.8397837776  |
| C9  | 1.0591127615  | -2.6473377234 | 5.1007444936  |
| C10 | 0.1138657913  | -2.2291589082 | 6.0415064309  |
| C11 | 0.3145080714  | -1.0453142071 | 6.7398656333  |
| C12 | -1.1157571583 | 0.9154356334  | 7.2679298587  |
| H13 | -3.2242085823 | 0.5220374628  | 7.1324805738  |
| H14 | -3.7761003262 | 2.8053578370  | 6.3489281596  |
| H15 | -1.9994108451 | 4.4982201111  | 6.0369396349  |
| H16 | 0.3700098511  | 3.9191660200  | 6.5085639318  |
| H17 | 3.2801081735  | -0.0776094643 | 5.3113941706  |
| H18 | 2.9112495888  | -2.2129638226 | 4.0938479782  |
| H19 | 0.8980062672  | -3.5736637058 | 4.5588789327  |
| H20 | -0.7780110182 | -2.8227229688 | 6.2214276357  |
| C21 | 0.2977419834  | -0.6630058697 | 11.4702961523 |
| C22 | 1.3993504174  | 0.1894547589  | 11.4965552733 |
| C23 | 1.8379376832  | 0.8010148617  | 10.3212804852 |
| C24 | 1.1582232295  | 0.5302683688  | 9.1396060232  |
| C25 | 0.0315856686  | -0.3089799886 | 9.1011488338  |

|      |               |               |               |
|------|---------------|---------------|---------------|
| C26  | -0.3929115498 | -0.9084042049 | 10.2802087260 |
| H27  | -0.0375449862 | -1.1354135742 | 12.3879350956 |
| H28  | 1.9143502455  | 0.3844833769  | 12.4310559271 |
| H29  | 2.6777327725  | 1.4903393356  | 10.3393860217 |
| H30  | -1.2626142792 | -1.5593908104 | 10.2772677666 |
| C31  | -0.6747325341 | -0.4709481986 | 7.7544815422  |
| H32  | -1.5410954538 | -1.1281134161 | 7.8553692310  |
| P33  | 1.4899039264  | 1.1965024848  | 7.4943532584  |
| Se34 | 3.1952263756  | 2.5657235325  | 7.2724820578  |
| C35  | 4.5817747000  | 1.2842811631  | 7.8341107675  |
| H36  | 5.5071153425  | 1.8595177938  | 7.7901876799  |
| H37  | 4.4006663402  | 0.9473589812  | 8.8524555280  |
| H38  | 4.6304495038  | 0.4464950802  | 7.1421130922  |

### 8-F

$$E(M06-2X/6-311+G^{**}) = -3574.6388706846$$

$$H(M06-2X/6-31+G^*) = -3574.4136923411$$

|     |               |               |               |
|-----|---------------|---------------|---------------|
| C1  | -0.0379352328 | -1.5808532698 | 6.3961589746  |
| C2  | -0.0514492462 | -1.5583023134 | 5.0010373296  |
| C3  | 0.1863929339  | -0.3639421018 | 4.3205513204  |
| C4  | 0.4522740985  | 0.8056370182  | 5.0328347275  |
| C5  | 0.4501476453  | 0.7849020273  | 6.4237382409  |
| C6  | 1.8207221325  | 1.4919586085  | 8.8197802317  |
| C7  | 2.9429974178  | 2.0890537566  | 9.3848740889  |
| C8  | 3.6567840548  | 1.4227493413  | 10.3812055656 |
| C9  | 3.2634391137  | 0.1477584205  | 10.7884282314 |
| C10 | 2.1466294530  | -0.4563736623 | 10.2099410611 |
| C11 | 1.4157295746  | 0.2164670472  | 9.2319254754  |

|      |               |               |               |
|------|---------------|---------------|---------------|
| C12  | 0.2026125460  | -0.4090476771 | 7.1121884741  |
| H13  | -0.2268801105 | -2.5096579900 | 6.9311945852  |
| H14  | -0.2482856555 | -2.4724179971 | 4.4466492828  |
| H15  | 0.1787004032  | -0.3468486567 | 3.2337501315  |
| H16  | 0.6769068664  | 1.7380911087  | 4.5215265198  |
| H17  | 3.2549503595  | 3.0664690732  | 9.0262651482  |
| H18  | 4.5285834416  | 1.8917278975  | 10.8300361053 |
| H19  | 3.8253168003  | -0.3772965862 | 11.5567942038 |
| H20  | 1.8346271397  | -1.4496296550 | 10.5274339005 |
| C21  | -3.0645692985 | 1.2411380790  | 9.9989400099  |
| C22  | -2.9050561147 | 2.5401250357  | 9.5257842544  |
| C23  | -1.7763010891 | 2.8894726991  | 8.7749893282  |
| C24  | -0.7878928327 | 1.9516488440  | 8.4826266372  |
| C25  | -0.9684739578 | 0.6459073161  | 8.9708250966  |
| C26  | -2.0850184328 | 0.2857971258  | 9.7176024102  |
| H27  | -3.9412837492 | 0.9693394952  | 10.5820351014 |
| H28  | -3.6620869049 | 3.2914663581  | 9.7397242608  |
| H29  | -1.6531783494 | 3.9032578453  | 8.4059421476  |
| H30  | -2.1907221380 | -0.7360420499 | 10.0788035370 |
| C31  | 0.1365308528  | -0.3424046431 | 8.6295355657  |
| H32  | -0.0784193395 | -1.3333140724 | 9.0449198948  |
| Se33 | 0.5871274888  | 4.3714127782  | 6.9762943207  |
| P34  | 0.8578552921  | 2.2675428315  | 7.4471890577  |
| F35  | 2.4072368200  | 2.2572027303  | 6.5652178407  |

9

$$E(M06-2X/6-311+G^{**}) = -1947.3060782224$$

$$H(M06-2X/6-31+G^*) = -1946.549463$$

$$E(BP86/6-31G^*) = -1947.5464958065$$

|     |               |               |               |
|-----|---------------|---------------|---------------|
| C1  | -2.3549672437 | 0.9057900430  | 6.2392233935  |
| C2  | -2.7022827116 | 2.1303494645  | 5.6608197578  |
| C3  | -1.7664514669 | 3.1544298419  | 5.5480066065  |
| C4  | -0.4607584757 | 2.9728306328  | 6.0118413877  |
| C5  | -0.1259143763 | 1.7518395179  | 6.5856766761  |
| C6  | 1.7067590929  | -0.2992382754 | 6.4044116056  |
| C7  | 2.8302942349  | -0.6829293607 | 5.6860339479  |
| C8  | 2.8389905265  | -1.9430915824 | 5.0841020940  |
| C9  | 1.7362818169  | -2.7849324047 | 5.2098986736  |
| C10 | 0.6093266324  | -2.3867734961 | 5.9351738442  |
| C11 | 0.5894565461  | -1.1356109685 | 6.5384762050  |
| C12 | -1.0620970774 | 0.7102447282  | 6.7066061376  |
| H13 | -3.0913318346 | 0.1105621249  | 6.3244172833  |
| H14 | -3.7145590512 | 2.2816428729  | 5.2977864616  |
| H15 | -2.0494890836 | 4.1017469808  | 5.0999756901  |
| H16 | 0.2808262423  | 3.7649911140  | 5.9383272233  |
| H17 | 3.6745828598  | -0.0040170631 | 5.6038678625  |
| H18 | 3.7063821262  | -2.2658347465 | 4.5168527801  |
| H19 | 1.7495425111  | -3.7632926252 | 4.7388786583  |
| H20 | -0.2464171028 | -3.0507404522 | 6.0267544486  |
| C21 | -0.0651959337 | -0.4986643175 | 11.1611598920 |
| C22 | 0.9615392295  | 0.4361609574  | 11.2599495825 |
| C23 | 1.4855980115  | 1.0315544497  | 10.1102592261 |
| C24 | 0.9638081541  | 0.6690477375  | 8.8744946576  |
| C25 | -0.0763550130 | -0.2695025894 | 8.7632807907  |
| C26 | -0.5887111209 | -0.8533488264 | 9.9147700217  |
| H27 | -0.4686842959 | -0.9549187248 | 12.0602581188 |
| H28 | 1.3532266599  | 0.7116384400  | 12.2341320348 |
| H29 | 2.2643296495  | 1.7857075520  | 10.1682231347 |

|     |               |               |              |
|-----|---------------|---------------|--------------|
| H30 | -1.3936411300 | -1.5806250060 | 9.8445671481 |
| C31 | -0.5809910356 | -0.5887710381 | 7.3556225723 |
| H32 | -1.3936136242 | -1.3190434284 | 7.3975555525 |
| P33 | 1.4981101802  | 1.2817050604  | 7.2482707558 |
| N34 | 2.7945845047  | 2.1864817435  | 7.0568635733 |
| S35 | 2.8883559109  | 3.7162476317  | 7.5910574151 |
| O36 | 2.4454750169  | 3.8063906008  | 8.9883371390 |
| O37 | 2.2851357593  | 4.6412068441  | 6.6279586447 |
| C38 | 7.3985256064  | 4.4182106406  | 7.4897430495 |
| C39 | 6.6037340542  | 4.7118838650  | 6.3746440645 |
| C40 | 5.2292345219  | 4.5027746920  | 6.3978747392 |
| C41 | 4.6457517819  | 3.9900780901  | 7.5529264293 |
| C42 | 5.4068659933  | 3.6932059606  | 8.6760822225 |
| C43 | 6.7826855682  | 3.9096458900  | 8.6362922669 |
| H44 | 7.0695278246  | 5.1174241987  | 5.4793622264 |
| H45 | 4.6042135363  | 4.7444478691  | 5.5438128456 |
| H46 | 4.9221045363  | 3.3144052822  | 9.5706651173 |
| H47 | 7.3852853596  | 3.6864640154  | 9.5129769870 |
| C48 | 8.8859042823  | 4.6619028486  | 7.4452985263 |
| H49 | 9.3624429930  | 4.3788803923  | 8.3872998242 |
| H50 | 9.3539153795  | 4.0844133181  | 6.6409157934 |
| H51 | 9.1035131085  | 5.7192859698  | 7.2598945288 |

**9-H<sup>+</sup>**

$$E(\text{M06-2X/6-311+G}^{**}) = -1947.6852806276$$

$$H(\text{M06-2X/6-31+G}^*) = -1946.914724$$

|    |               |              |              |
|----|---------------|--------------|--------------|
| C1 | -2.3897936722 | 1.0685678681 | 6.9173647977 |
| C2 | -2.7859868779 | 2.2667259691 | 6.3163213868 |

|     |               |               |               |
|-----|---------------|---------------|---------------|
| C3  | -1.8437466097 | 3.1893079262  | 5.8670276093  |
| C4  | -0.4805243742 | 2.9324613670  | 6.0160272713  |
| C5  | -0.1010169308 | 1.7372164113  | 6.6156794131  |
| C6  | 1.5039896107  | -0.4940680362 | 6.1647069651  |
| C7  | 2.3679809193  | -1.0458966601 | 5.2265657441  |
| C8  | 2.1104050072  | -2.3357042349 | 4.7604478542  |
| C9  | 1.0101747914  | -3.0435345357 | 5.2376336721  |
| C10 | 0.1520714667  | -2.4815649857 | 6.1870165086  |
| C11 | 0.3914381850  | -1.1984814391 | 6.6605759701  |
| C12 | -1.0375146755 | 0.7928723526  | 7.0703696462  |
| H13 | -3.1341599975 | 0.3563800449  | 7.2623063537  |
| H14 | -3.8437916583 | 2.4795906596  | 6.1987447755  |
| H15 | -2.1672403144 | 4.1152116858  | 5.4033511831  |
| H16 | 0.2578565016  | 3.6530378720  | 5.6752019827  |
| H17 | 3.2336797209  | -0.5011182934 | 4.8596319449  |
| H18 | 2.7710702148  | -2.7848838364 | 4.0265618284  |
| H19 | 0.8160441745  | -4.0459539791 | 4.8698149663  |
| H20 | -0.7010668116 | -3.0452135056 | 6.5538746985  |
| C21 | 1.0237349890  | -0.2054192115 | 11.2273082092 |
| C22 | 2.1278378861  | 0.6066551513  | 10.9744909684 |
| C23 | 2.3729792417  | 1.0710400463  | 9.6826722402  |
| C24 | 1.4949312965  | 0.7021552850  | 8.6727352085  |
| C25 | 0.3842687458  | -0.1266230703 | 8.9054638948  |
| C26 | 0.1533092620  | -0.5770324853 | 10.1990648983 |
| H27 | 0.8373502890  | -0.5589013198 | 12.2363970935 |
| H28 | 2.7973188085  | 0.8804896684  | 11.7830446362 |
| H29 | 3.2292553166  | 1.7029566135  | 9.4677116077  |
| H30 | -0.6987925772 | -1.2170621869 | 10.4086236002 |
| C31 | -0.4878050462 | -0.4917275624 | 7.6988764443  |
| H32 | -1.3070867981 | -1.1446696747 | 8.0070632082  |

|     |              |              |               |
|-----|--------------|--------------|---------------|
| P33 | 1.5562043278 | 1.1282163983 | 6.9361493505  |
| S34 | 2.9669331545 | 3.7032413951 | 6.8367308158  |
| O35 | 2.0281824385 | 3.7940862623 | 7.9400679781  |
| O36 | 2.7833712537 | 4.4062932690 | 5.5859006827  |
| C37 | 7.2070958482 | 4.3474272510 | 8.3100465623  |
| C38 | 6.9283786606 | 4.2930374983 | 6.9354487117  |
| C39 | 5.6355848167 | 4.0953804467 | 6.4720636243  |
| C40 | 4.6129373723 | 3.9328863330 | 7.4083125619  |
| C41 | 4.8482472788 | 3.9942108657 | 8.7791237344  |
| C42 | 6.1525655776 | 4.2029597602 | 9.2178958982  |
| H43 | 7.7366976026 | 4.4251856590 | 6.2212406925  |
| H44 | 5.4172048334 | 4.0943808021 | 5.4080821293  |
| H45 | 4.0233876145 | 3.9199235203 | 9.4813134604  |
| H46 | 6.3510102440 | 4.2694379077 | 10.2835907766 |
| C47 | 8.6156844073 | 4.5855487472 | 8.7829320950  |
| H48 | 8.6882606246 | 4.5307636255 | 9.8709921734  |
| H49 | 9.2995952209 | 3.8464081795 | 8.3544662686  |
| H50 | 8.9628989740 | 5.5751553565 | 8.4681334946  |
| N51 | 2.8770529302 | 2.0182910977 | 6.4336933682  |
| H52 | 3.2426209935 | 1.8071788353 | 5.5043046053  |

### 9-Me<sup>+</sup>

$$E(\text{M06-2X/6-311+G**}) = -1986.98035709831$$

$$H(\text{M06-2X/6-31+G*}) = -1986.170518$$

|    |               |              |              |
|----|---------------|--------------|--------------|
| C1 | -2.3905748727 | 1.0859421018 | 6.8567542433 |
| C2 | -2.7802664486 | 2.2763593428 | 6.2366439679 |
| C3 | -1.8336547033 | 3.1893712733 | 5.7753757081 |



|     |               |               |               |
|-----|---------------|---------------|---------------|
| C4  | -0.4719138029 | 2.9284921494  | 5.9293643925  |
| C5  | -0.0986574109 | 1.7386439982  | 6.5448311697  |
| C6  | 1.5437526073  | -0.4985829220 | 6.1598289840  |
| C7  | 2.4585120122  | -1.1351291262 | 5.3252139459  |
| C8  | 2.2223203267  | -2.4564628080 | 4.9451344388  |
| C9  | 1.0922932995  | -3.1259257464 | 5.4034937491  |
| C10 | 0.1958147845  | -2.4942105108 | 6.2673371294  |
| C11 | 0.4158087597  | -1.1806574654 | 6.6598501109  |
| C12 | -1.0386907829 | 0.8096729168  | 7.0135553762  |
| H13 | -3.1380536932 | 0.3831901782  | 7.2140855790  |
| H14 | -3.8369268264 | 2.4926497096  | 6.1152178365  |
| H15 | -2.1537239463 | 4.1106499761  | 5.3003738262  |
| H16 | 0.2713543654  | 3.6436067300  | 5.5850706323  |
| H17 | 3.3532589143  | -0.6328961390 | 4.9768394979  |
| H18 | 2.9275721101  | -2.9595566540 | 4.2921252386  |
| H19 | 0.9116880898  | -4.1520574798 | 5.0999506763  |
| H20 | -0.6708247508 | -3.0304976039 | 6.6428106205  |
| C21 | 1.0566649048  | -0.1746786885 | 11.1780921639 |
| C22 | 2.1788143905  | 0.6071009953  | 10.9132343967 |
| C23 | 2.4167533299  | 1.0767839569  | 9.6223166674  |
| C24 | 1.5171094127  | 0.7448363905  | 8.6187457316  |
| C25 | 0.3963415922  | -0.0686247376 | 8.8622713846  |
| C26 | 0.1685665918  | -0.5190765419 | 10.1567744812 |
| H27 | 0.8734026283  | -0.5292930636 | 12.1872759726 |
| H28 | 2.8690683800  | 0.8552763981  | 11.7126631382 |
| H29 | 3.2868363134  | 1.6864076103  | 9.4043216991  |
| H30 | -0.6945120151 | -1.1436151715 | 10.3695689620 |
| C31 | -0.4808421324 | -0.4526251197 | 7.6661189840  |
| H32 | -1.2922621874 | -1.1082803845 | 7.9890646937  |
| P33 | 1.5693234935  | 1.1664432711  | 6.8704830251  |

|     |              |              |               |
|-----|--------------|--------------|---------------|
| S34 | 2.9001871292 | 3.7500128080 | 6.9499382371  |
| O35 | 2.0107677731 | 3.6836109827 | 8.0956420631  |
| O36 | 2.6662091343 | 4.6469515665 | 5.8371476774  |
| C37 | 7.2030032615 | 4.2258406600 | 8.3216609544  |
| C38 | 6.8796541251 | 4.2657986345 | 6.9565742079  |
| C39 | 5.5689253859 | 4.1226310963 | 6.5241710977  |
| C40 | 4.5714056383 | 3.9130074884 | 7.4788940030  |
| C41 | 4.8530980349 | 3.8849612621 | 8.8417415461  |
| C42 | 6.1742694350 | 4.0435771567 | 9.2511782943  |
| H43 | 7.6670639510 | 4.4318158093 | 6.2262181693  |
| H44 | 5.3208701163 | 4.2027116085 | 5.4700771735  |
| H45 | 4.0496144790 | 3.7829547188 | 9.5647176740  |
| H46 | 6.4059362963 | 4.0404391337 | 10.3122501166 |
| C47 | 8.6301637189 | 4.4091794569 | 8.7624263582  |
| H48 | 8.7362921489 | 4.2802467912 | 9.8414402634  |
| H49 | 9.2868697499 | 3.6898608545 | 8.2635590074  |
| H50 | 8.9849342797 | 5.4121436824 | 8.5032633025  |
| N51 | 2.7964936855 | 2.1473576258 | 6.2900872017  |
| C52 | 3.2965185172 | 1.9812297527 | 4.9039818058  |
| H53 | 3.3505659269 | 2.9671741981 | 4.4389179424  |
| H54 | 4.2828315135 | 1.5124527291 | 4.9136344169  |
| H55 | 2.5970486682 | 1.3856765438 | 4.3143199891  |

**9-F**

$$E(M06-2X/6-311+G^{**}) = -2047.23567991735$$

$$H(M06-2X/6-31+G^*) = -2046.447658$$

|    |              |               |              |
|----|--------------|---------------|--------------|
| C1 | 0.3492053206 | -1.4974761574 | 6.1363832490 |
| C2 | 0.5563919029 | -1.3174759493 | 4.7675984537 |

|     |               |               |               |
|-----|---------------|---------------|---------------|
| C3  | 0.8461978058  | -0.0503555077 | 4.2622186278  |
| C4  | 0.9459861525  | 1.0437340411  | 5.1231277729  |
| C5  | 0.7202997557  | 0.8611723983  | 6.4845069159  |
| C6  | 1.7021628332  | 1.3314420859  | 9.1095784950  |
| C7  | 2.7253325171  | 1.8871793651  | 9.8713699943  |
| C8  | 3.3218841601  | 1.1335336591  | 10.8826338800 |
| C9  | 2.9162730047  | -0.1823764218 | 11.1033377504 |
| C10 | 1.9054808330  | -0.7454618696 | 10.3227282905 |
| C11 | 1.2864921473  | 0.0112302068  | 9.3300957525  |
| C12 | 0.4189972055  | -0.4067892458 | 7.0002944700  |
| H13 | 0.1219757266  | -2.4858304989 | 6.5314793362  |
| H14 | 0.4910225427  | -2.1696050011 | 4.0956312493  |
| H15 | 1.0081503451  | 0.0850556586  | 3.1960394538  |
| H16 | 1.2034794178  | 2.0367506927  | 4.7597465088  |
| H17 | 3.0600852545  | 2.8993938863  | 9.6558398827  |
| H18 | 4.1140484766  | 1.5677509384  | 11.4868541439 |
| H19 | 3.3892570293  | -0.7743661596 | 11.8827753795 |
| H20 | 1.5907277300  | -1.7733605221 | 10.4924740015 |
| C21 | -3.2999411825 | 0.8733134191  | 9.5103177092  |
| C22 | -3.1106253757 | 2.2173861309  | 9.1993810417  |
| C23 | -1.8920014008 | 2.6589482810  | 8.6726417062  |
| C24 | -0.8504950786 | 1.7593644059  | 8.4542296720  |
| C25 | -1.0569715808 | 0.4086401245  | 8.7704608157  |
| C26 | -2.2649365105 | -0.0398011911 | 9.2929185277  |
| H27 | -4.2487564191 | 0.5324479222  | 9.9178027719  |
| H28 | -3.9160095423 | 2.9294229140  | 9.3643809770  |
| H29 | -1.7318254295 | 3.7030290810  | 8.4205545391  |
| H30 | -2.4008273521 | -1.0943683178 | 9.5278405372  |
| C31 | 0.1254432927  | -0.5096290170 | 8.4924101367  |
| H32 | -0.1046042333 | -1.5459591384 | 8.7641574443  |

|     |              |              |               |
|-----|--------------|--------------|---------------|
| N33 | 0.4721000635 | 3.7922183281 | 7.6270118106  |
| S34 | 1.1643408362 | 4.8978506022 | 6.7015027001  |
| O35 | 0.3674498795 | 6.1249339960 | 6.8347306853  |
| O36 | 1.4569753797 | 4.4346381684 | 5.3349965057  |
| C37 | 5.1928813746 | 6.0351417500 | 8.6106234346  |
| C38 | 3.9817439603 | 6.4725654107 | 9.1608415060  |
| C39 | 2.7660300138 | 6.1274279798 | 8.5779665938  |
| C40 | 2.7534133278 | 5.3275941909 | 7.4370765533  |
| C41 | 3.9411686153 | 4.8790965722 | 6.8758188484  |
| C42 | 5.1540657803 | 5.2387860749 | 7.4638401154  |
| H43 | 3.9941557293 | 7.0977394078 | 10.0523634897 |
| P44 | 0.8716292876 | 2.2093238406 | 7.7217608581  |
| F45 | 2.4884677444 | 2.4830972900 | 7.0912186887  |
| H46 | 3.8981179877 | 4.2458462172 | 5.9958915537  |
| H47 | 1.8235341895 | 6.4785643166 | 8.9885185402  |
| H48 | 6.0863864044 | 4.8879732404 | 7.0257057189  |
| C49 | 6.5046039379 | 6.4288333113 | 9.2459600168  |
| H50 | 7.3491391728 | 5.9763535915 | 8.7179751185  |
| H51 | 6.6417338981 | 7.5163527436 | 9.2304568278  |
| H52 | 6.5507657284 | 6.1082479768 | 10.2929010260 |

### 9-He8-ring complex at 1.7 Å

E(BP86/6-31G\*) = -1970.6344634671

|     |              |              |               |
|-----|--------------|--------------|---------------|
| He1 | 2.0198000000 | 1.8633000000 | 11.4447000000 |
| He2 | 6.2279999587 | 3.2546000007 | 9.1306998684  |
| He3 | 4.8860000000 | 0.1785000000 | 10.2418000000 |
| He4 | 3.3618000000 | 4.9395000000 | 10.3336000000 |

|     |               |               |               |
|-----|---------------|---------------|---------------|
| He5 | 3.1955000000  | 0.3896000000  | 11.1134000000 |
| He6 | 5.0726000012  | 4.7343999277  | 9.5021000722  |
| He7 | 6.1504000491  | 1.3674000138  | 9.4372000977  |
| He8 | 2.0974000000  | 3.7505000000  | 11.1382000000 |
| X9  | 4.1239000000  | 2.5590000000  | 10.2877000000 |
| C10 | -0.2766487412 | -0.4089100388 | 5.4438438225  |
| C11 | 0.4998163155  | -0.4557701655 | 4.2755763117  |
| C12 | 1.8001265414  | 0.0664719631  | 4.2816603691  |
| C13 | 2.3191994584  | 0.6708237121  | 5.4384930222  |
| C14 | 1.5383940883  | 0.7370237210  | 6.6001923641  |
| C15 | 1.7449137835  | -0.2940727443 | 9.0268376749  |
| C16 | 2.7085346292  | -1.2254326269 | 9.4402062915  |
| C17 | 2.3332917730  | -2.5194249252 | 9.8374816600  |
| C18 | 0.9884571536  | -2.9064661852 | 9.7983982643  |
| C19 | 0.0340531487  | -2.0232558022 | 9.2720228100  |
| C20 | 0.4077472053  | -0.7405632125 | 8.8476835369  |
| C21 | 0.2410224418  | 0.1650137287  | 6.6129500111  |
| H22 | -1.2861737771 | -0.8381928661 | 5.4559062054  |
| H23 | 0.0908491203  | -0.9103069144 | 3.3661896856  |
| H24 | 2.4162389132  | 0.0219955205  | 3.3766144536  |
| H25 | 3.3152356274  | 1.1177232864  | 5.4169663652  |
| H26 | 3.7599320920  | -0.9567424652 | 9.4545959803  |
| H27 | 3.1038705681  | -3.2220389282 | 10.1731395905 |
| H28 | 0.6878996150  | -3.9079838707 | 10.1259516776 |
| H29 | -1.0057282818 | -2.3468546317 | 9.1408504758  |
| C30 | -2.0711382602 | 3.3941875712  | 9.1648243596  |
| C31 | -0.9100214122 | 4.1681781480  | 9.3159506067  |
| C32 | 0.3540774736  | 3.6058415942  | 9.0808507074  |
| C33 | 0.4397420940  | 2.2594002032  | 8.6968992836  |
| C34 | -0.7238795589 | 1.4911135245  | 8.5012791624  |

|     |               |               |              |
|-----|---------------|---------------|--------------|
| C35 | -1.9823495867 | 2.0560823934  | 8.7484050960 |
| H36 | -3.0545603737 | 3.8392364754  | 9.3548912474 |
| H37 | -0.9854792800 | 5.2199790170  | 9.6128006067 |
| H38 | 1.2585182870  | 4.2124203393  | 9.1711598161 |
| H39 | -2.8897350155 | 1.4578609172  | 8.5997043235 |
| C40 | -0.5129610704 | 0.0919060604  | 7.9551463439 |
| H41 | -1.4781256595 | -0.4242105949 | 7.8195043973 |
| P42 | 2.0164054980  | 1.4144325314  | 8.2971486828 |
| N43 | 3.3659999910  | 2.3454000577  | 8.7809999617 |
| S44 | 3.4887306657  | 3.5280980165  | 7.5121195688 |
| O45 | 3.4071885577  | 4.9148154740  | 8.0269778970 |
| O46 | 2.5310378544  | 3.2263442919  | 6.3969440332 |
| C47 | 7.6176755643  | 3.0388689940  | 5.4800370986 |
| C48 | 7.0374096521  | 4.3074883289  | 5.6831394070 |
| C49 | 5.8092657815  | 4.4498431677  | 6.3419238240 |
| C50 | 5.1424457413  | 3.3063335982  | 6.8063094848 |
| C51 | 5.6951180918  | 2.0324568022  | 6.6161870324 |
| C52 | 6.9245926723  | 1.9070725286  | 5.9551859997 |
| H53 | 7.5581823277  | 5.2026885853  | 5.3208764202 |
| H54 | 5.3655406552  | 5.4365348918  | 6.5060889803 |
| H55 | 5.1816949790  | 1.1493659588  | 7.0090223803 |
| H56 | 7.3593539110  | 0.9097969961  | 5.8129050247 |
| C57 | 8.9618322720  | 2.9010374929  | 4.7966492642 |
| H58 | 9.0964645520  | 1.8939582542  | 4.3659251303 |
| H59 | 9.0801605173  | 3.6397809102  | 3.9844648710 |
| H60 | 9.7914900417  | 3.0673968014  | 5.5105716491 |

**9-Hes-ring complex at 2.2 Å**

E(BP86/6-31G\*) = -1970.6670953528

|     |               |               |               |
|-----|---------------|---------------|---------------|
| He1 | 2.0198000000  | 1.8633000000  | 11.4447000000 |
| He2 | 6.2280000006  | 3.2546000002  | 9.1307000011  |
| He3 | 4.8859999998  | 0.1785000016  | 10.2417999999 |
| He4 | 3.3618000000  | 4.9395000000  | 10.3336000000 |
| He5 | 3.1955000000  | 0.3896000000  | 11.1134000000 |
| He6 | 5.0726000000  | 4.7344000000  | 9.5021000000  |
| He7 | 6.1504000001  | 1.3673999991  | 9.4371999990  |
| He8 | 2.0974000000  | 3.7505000000  | 11.1382000000 |
| X9  | 4.1239000000  | 2.5590000000  | 10.2877000000 |
| C10 | -0.7944033970 | -0.2544044766 | 5.2719190805  |
| C11 | -0.1563510883 | -0.1995236838 | 4.0222492146  |
| C12 | 1.1120469713  | 0.3848050874  | 3.9098006357  |
| C13 | 1.7418851631  | 0.9429704302  | 5.0350568720  |
| C14 | 1.0994460617  | 0.9037299877  | 6.2799812253  |
| C15 | 1.5623296221  | -0.1849927182 | 8.6934685176  |
| C16 | 2.6028330458  | -1.0164599914 | 9.1192931876  |
| C17 | 2.3197201257  | -2.3180703968 | 9.5661996101  |
| C18 | 1.0002570135  | -2.7894597933 | 9.5695980878  |
| C19 | -0.0356364804 | -1.9833968205 | 9.0680573709  |
| C20 | 0.2411792760  | -0.6917825790 | 8.6032246005  |
| C21 | -0.1690266424 | 0.2791963961  | 6.4063487186  |
| H22 | -1.7796403005 | -0.7266855463 | 5.3705274827  |
| H23 | -0.6503537258 | -0.6211179039 | 3.1395015549  |
| H24 | 1.6169588011  | 0.4224490549  | 2.9380678870  |
| H25 | 2.7091621251  | 1.4380558607  | 4.9337816289  |
| H26 | 3.6281589210  | -0.6525255941 | 9.0920006650  |
| H27 | 3.1368546217  | -2.9630008668 | 9.9079818902  |
| H28 | 0.7775590184  | -3.8003476706 | 9.9293303844  |

|     |               |               |              |
|-----|---------------|---------------|--------------|
| H29 | -1.0588074384 | -2.3734636534 | 9.0054382877 |
| C30 | -2.2402392158 | 3.3643389097  | 9.3387992903 |
| C31 | -1.0796189331 | 4.1499037310  | 9.4167569022 |
| C32 | 0.1593791460  | 3.6253651003  | 9.0145266801 |
| C33 | 0.2107443328  | 2.3094889679  | 8.5354313681 |
| C34 | -0.9536182003 | 1.5210332283  | 8.4287096241 |
| C35 | -2.1830267844 | 2.0508537019  | 8.8416880706 |
| H36 | -3.2029353759 | 3.7798206775  | 9.6580518117 |
| H37 | -1.1371161660 | 5.1781905034  | 9.7900888188 |
| H38 | 1.0703794191  | 4.2305568582  | 9.0590355932 |
| H39 | -3.0949629815 | 1.4458304648  | 8.7661975448 |
| C40 | -0.7772676660 | 0.1374789356  | 7.8147479664 |
| H41 | -1.7435056884 | -0.3921914679 | 7.7607369445 |
| P42 | 1.7338741911  | 1.4895328367  | 7.9445716303 |
| N43 | 3.1441999994  | 2.2828999991  | 8.3401000000 |
| S44 | 3.3695857883  | 3.5607167490  | 7.2418306691 |
| O45 | 3.3816416227  | 4.8765189481  | 7.9236234374 |
| O46 | 2.4208449742  | 3.4424172120  | 6.0854422971 |
| C47 | 7.5081386392  | 2.9305549342  | 5.2782688903 |
| C48 | 7.0373897260  | 4.2176076046  | 5.6112606621 |
| C49 | 5.8067443343  | 4.3977771697  | 6.2544732938 |
| C50 | 5.0277221638  | 3.2752056950  | 6.5733086596 |
| C51 | 5.4733691161  | 1.9839762519  | 6.2599480776 |
| C52 | 6.7068548418  | 1.8210779653  | 5.6136285555 |
| H53 | 7.6465663616  | 5.0957029913  | 5.3627608509 |
| H54 | 5.4445442726  | 5.3962945167  | 6.5177516278 |
| H55 | 4.8679892033  | 1.1141134563  | 6.5345867717 |
| H56 | 7.0576983539  | 0.8102682381  | 5.3707328362 |
| C57 | 8.8494818750  | 2.7499525605  | 4.5991998952 |
| H58 | 8.9693636430  | 1.7266768912  | 4.2045828046 |



|     |              |              |              |
|-----|--------------|--------------|--------------|
| H59 | 8.9753197827 | 3.4565438238 | 3.7591642375 |
| H60 | 9.6825900748 | 2.9344483745 | 5.3038385958 |

**10**

$$E(M06-2X/6-311+G^{**}) = -1398.98093911486$$

$$H(M06-2X/6-31+G^*) = -1398.283333$$

$$E(BP86/6-31G^*) = -1399.1601949648$$

|     |               |               |              |
|-----|---------------|---------------|--------------|
| C1  | -2.4026042967 | 1.3660033865  | 6.8641386016 |
| C2  | -2.6758942304 | 2.6734348257  | 6.4531220279 |
| C3  | -1.6521406224 | 3.6103350496  | 6.3340697085 |
| C4  | -0.3353128818 | 3.2511879409  | 6.6285354541 |
| C5  | -0.0730924771 | 1.9526778217  | 7.0441473261 |
| C6  | 1.5206605112  | -0.2068658502 | 6.4569699641 |
| C7  | 2.5168030607  | -0.6135198368 | 5.5794063866 |
| C8  | 2.3405919623  | -1.7999786221 | 4.8647358506 |
| C9  | 1.1801464759  | -2.5515710015 | 5.0329216477 |
| C10 | 0.1788419490  | -2.1313088067 | 5.9124693518 |
| C11 | 0.3447320901  | -0.9532620564 | 6.6303587740 |
| C12 | -1.0959022068 | 0.9986614726  | 7.1616947292 |
| H13 | -3.2063550381 | 0.6389990026  | 6.9502581617 |
| H14 | -3.6976783861 | 2.9584604579  | 6.2205448994 |
| H15 | -1.8761392827 | 4.6203343222  | 6.0053481407 |
| H16 | 0.4785400205  | 3.9628092231  | 6.5224934646 |
| H17 | 3.4060743725  | -0.0040548379 | 5.4461381471 |
| H18 | 3.1073734071  | -2.1323951291 | 4.1720131104 |
| H19 | 1.0477853817  | -3.4723406966 | 4.4725846354 |
| H20 | -0.7258953584 | -2.7215672586 | 6.0350121792 |

|     |               |               |               |
|-----|---------------|---------------|---------------|
| C21 | 0.2005628755  | -0.7725896090 | 11.3391529486 |
| C22 | 1.3291257723  | 0.0407928736  | 11.4121773867 |
| C23 | 1.7935322566  | 0.6988602831  | 10.2709408527 |
| C24 | 1.1097413488  | 0.5237440778  | 9.0753344774  |
| C25 | -0.0275719792 | -0.2922135512 | 8.9901511729  |
| C26 | -0.4815544246 | -0.9424933047 | 10.1307571096 |
| H27 | -0.1552929874 | -1.2819946763 | 12.2298769190 |
| H28 | 1.8489551651  | 0.1632894615  | 12.3573217832 |
| H29 | 2.6710516983  | 1.3387206364  | 10.2983938054 |
| H30 | -1.3611344602 | -1.5795392045 | 10.0827303951 |
| C31 | -0.6875236676 | -0.4032785512 | 7.6163886794  |
| H32 | -1.5605774663 | -1.0600347016 | 7.6622878155  |
| P33 | 1.5545094449  | 1.2827077213  | 7.4971821588  |
| N34 | 2.8585157155  | 2.2012825995  | 7.6435927965  |
| C35 | 3.2832857643  | 2.8202334576  | 6.4953105230  |
| O36 | 2.7232581812  | 2.7105648937  | 5.4009101634  |
| C37 | 4.5413045338  | 3.6808142282  | 6.6735434531  |
| C38 | 5.6828680628  | 2.7803088275  | 7.1681069543  |
| H39 | 6.5956639693  | 3.3739987491  | 7.2960803576  |
| H40 | 5.4264486980  | 2.3169892984  | 8.1247367535  |
| H41 | 5.8962670268  | 1.9839925143  | 6.4453498671  |
| C42 | 4.2526033603  | 4.7620511403  | 7.7250792028  |
| H43 | 5.1388584414  | 5.3927377174  | 7.8628342914  |
| H44 | 3.4246714753  | 5.4070728041  | 7.4082103666  |
| H45 | 3.9883732826  | 4.3104418758  | 8.6850159711  |
| C46 | 4.9204203704  | 4.3281978773  | 5.3426494576  |
| H47 | 5.8189133327  | 4.9426191901  | 5.4729937737  |
| H48 | 5.1212608050  | 3.5710739821  | 4.5789842255  |
| H49 | 4.1124132787  | 4.9640234502  | 4.9691105710  |

**10-H<sup>+</sup>**

$$E(M06-2X/6-311+G^{**}) = -1399.372196782$$

$$H(M06-2X/6-31+G^*) = -1398.658159$$

|     |               |               |               |
|-----|---------------|---------------|---------------|
| C1  | -2.3222603042 | 1.4506147754  | 6.7867620300  |
| C2  | -2.5574088124 | 2.7771046369  | 6.4153064630  |
| C3  | -1.5227670777 | 3.7097849698  | 6.3897822276  |
| C4  | -0.2268528467 | 3.3287824531  | 6.7372940013  |
| C5  | -0.0080120318 | 2.0089239908  | 7.1105864950  |
| C6  | 1.6064633014  | -0.1895084935 | 6.5106761466  |
| C7  | 2.6442501003  | -0.5813428477 | 5.6747907537  |
| C8  | 2.4763742783  | -1.7370191720 | 4.9121114122  |
| C9  | 1.2906974383  | -2.4640084655 | 4.9941210559  |
| C10 | 0.2522301799  | -2.0555950565 | 5.8354245042  |
| C11 | 0.4026768122  | -0.9093058945 | 6.6045515760  |
| C12 | -1.0390398703 | 1.0537778515  | 7.1392746404  |
| H13 | -3.1377116815 | 0.7329549584  | 6.7990139795  |
| H14 | -3.5615697121 | 3.0826062008  | 6.1391295904  |
| H15 | -1.7217545852 | 4.7338142830  | 6.0922552893  |
| H16 | 0.5909748278  | 4.0422111968  | 6.7028073519  |
| H17 | 3.5564234218  | 0.0035526525  | 5.6050309225  |
| H18 | 3.2699392510  | -2.0646969847 | 4.2490398988  |
| H19 | 1.1683631496  | -3.3598757914 | 4.3937769978  |
| H20 | -0.6680095556 | -2.6305382533 | 5.8878337296  |
| C21 | 0.0102609017  | -0.9010830236 | 11.3117545981 |
| C22 | 1.1463646405  | -0.1152968601 | 11.4881671556 |
| C23 | 1.6892651712  | 0.5798108365  | 10.4072553220 |
| C24 | 1.0737264372  | 0.4681587620  | 9.1652778894  |

|     |               |               |               |
|-----|---------------|---------------|---------------|
| C25 | -0.0742721730 | -0.3221530905 | 8.9739114786  |
| C26 | -0.6019399748 | -1.0072384932 | 10.0602418490 |
| H27 | -0.4065101669 | -1.4391266692 | 12.1570737382 |
| H28 | 1.6119465685  | -0.0416440762 | 12.4650971850 |
| H29 | 2.5762368940  | 1.1905790991  | 10.5534068383 |
| H30 | -1.4877509470 | -1.6235224811 | 9.9357145709  |
| C31 | -0.6663879480 | -0.3714083961 | 7.5620496861  |
| H32 | -1.5486261263 | -1.0147806968 | 7.5449344799  |
| P33 | 1.5285451601  | 1.2291111754  | 7.6032745326  |
| C34 | 3.3851965911  | 2.8594101193  | 6.6140468505  |
| O35 | 2.7886786428  | 2.7055337360  | 5.5726012651  |
| C36 | 4.6272949870  | 3.7100450230  | 6.8255644167  |
| C37 | 5.7752855380  | 2.8078553089  | 7.3129965548  |
| H38 | 6.6862418528  | 3.4070846397  | 7.4020376625  |
| H39 | 5.5797944455  | 2.3656245218  | 8.2964811362  |
| H40 | 5.9742318147  | 1.9976451772  | 6.6039305372  |
| C41 | 4.3194759579  | 4.7973592969  | 7.8705903166  |
| H42 | 5.1905177522  | 5.4515337842  | 7.9713000902  |
| H43 | 3.4689393715  | 5.4153728013  | 7.5649172196  |
| H44 | 4.1072172819  | 4.3847720597  | 8.8634746494  |
| C45 | 4.9964746707  | 4.3548446972  | 5.4879117988  |
| H46 | 5.8907344341  | 4.9708401773  | 5.6197522360  |
| H47 | 5.2042076889  | 3.5981881198  | 4.7267362217  |
| H48 | 4.1878603405  | 4.9902669970  | 5.1170608622  |
| N49 | 2.8858515063  | 2.1843733032  | 7.7536779774  |
| H50 | 3.3450159508  | 2.2799796235  | 8.6540092684  |

**10-Me<sup>+</sup>**

$$E(M06-2X/6-311+G^{**}) = -1438.65663479280$$

$$H(M06-2X/6-31+G^*) = -1437.903327$$

|     |               |               |               |
|-----|---------------|---------------|---------------|
| C1  | -2.2987481989 | 1.6522197320  | 6.9568159216  |
| C2  | -2.4867831257 | 3.0207710084  | 6.7459363199  |
| C3  | -1.4194808908 | 3.9143663682  | 6.8241310545  |
| C4  | -0.1381223081 | 3.4484540855  | 7.1165430957  |
| C5  | 0.0331633732  | 2.0868002732  | 7.3332743123  |
| C6  | 1.6088843580  | -0.0743832164 | 6.4807103747  |
| C7  | 2.6390858616  | -0.4427014588 | 5.6241462249  |
| C8  | 2.4329894425  | -1.5160688763 | 4.7583609361  |
| C9  | 1.2126391758  | -2.1872159226 | 4.7511206468  |
| C10 | 0.1831003349  | -1.8071175300 | 5.6143547058  |
| C11 | 0.3741453515  | -0.7488084639 | 6.4939460316  |
| C12 | -1.0285964335 | 1.1749495985  | 7.2546574150  |
| H13 | -3.1385605075 | 0.9666694669  | 6.8862465410  |
| H14 | -3.4795890603 | 3.3922387600  | 6.5125866416  |
| H15 | -1.5832889246 | 4.9723861225  | 6.6489730698  |
| H16 | 0.7068355351  | 4.1313887821  | 7.1592336727  |
| H17 | 3.5784509232  | 0.0996353541  | 5.6140026421  |
| H18 | 3.2250602683  | -1.8197379475 | 4.0821122512  |
| H19 | 1.0577824021  | -3.0157157381 | 4.0673662761  |
| H20 | -0.7645982947 | -2.3382275730 | 5.6031884744  |
| C21 | 0.0429404859  | -1.4234335232 | 11.0962058418 |
| C22 | 1.2330138417  | -0.7474955395 | 11.3490926203 |
| C23 | 1.7761353622  | 0.1031582716  | 10.3857571122 |
| C24 | 1.1064972726  | 0.2716222927  | 9.1758024669  |
| C25 | -0.0791472211 | -0.4374325537 | 8.8994155096  |
| C26 | -0.6083275847 | -1.2779754367 | 9.8699601944  |
| H27 | -0.3758242304 | -2.0809633397 | 11.8513037952 |

|     |               |               |               |
|-----|---------------|---------------|---------------|
| H28 | 1.7462846786  | -0.8827435354 | 12.2952638623 |
| H29 | 2.7142711470  | 0.6062200163  | 10.5895106958 |
| H30 | -1.5225659079 | -1.8287463687 | 9.6672542424  |
| C31 | -0.6864378470 | -0.2927496335 | 7.5030122156  |
| H32 | -1.5799817211 | -0.9144370660 | 7.4145569632  |
| P33 | 1.5647003591  | 1.2373705584  | 7.7148453323  |
| C34 | 3.4023194107  | 2.7876828201  | 6.7477654627  |
| O35 | 2.7618069798  | 2.5404867464  | 5.7449485055  |
| C36 | 4.6906505259  | 3.6144988837  | 6.7170487541  |
| C37 | 5.7108226402  | 3.2283736777  | 7.7996686133  |
| H38 | 6.6920402813  | 3.6095663336  | 7.5022464614  |
| H39 | 5.4912619189  | 3.6594269551  | 8.7782309162  |
| H40 | 5.8009208418  | 2.1411576501  | 7.9045424318  |
| C41 | 4.3032790307  | 5.1035151124  | 6.8175574225  |
| H42 | 5.2090453017  | 5.7105451406  | 6.7223803746  |
| H43 | 3.6197678104  | 5.3811153809  | 6.0094720676  |
| H44 | 3.8356841958  | 5.3620614168  | 7.7733639474  |
| C45 | 5.3218849358  | 3.3651813231  | 5.3357043902  |
| H46 | 6.2074637084  | 3.9985719301  | 5.2317079273  |
| H47 | 5.6363462200  | 2.3212859301  | 5.2296793234  |
| H48 | 4.6240866140  | 3.5976020385  | 4.5299054475  |
| N49 | 2.9017785822  | 2.2372827608  | 7.9592928868  |
| C50 | 3.1096926836  | 2.8460584487  | 9.2912475979  |
| H51 | 3.3311078481  | 3.9051190231  | 9.1707725801  |
| H52 | 2.1896695014  | 2.7705704569  | 9.8749728265  |
| H53 | 3.9267650602  | 2.3596953934  | 9.8262616131  |

10-F

$$E(M06-2X/6-311+G^{**}) = -1498.894430795$$

$$H(M06-2X/6-31+G^*) = -1498.165083$$

|     |               |               |               |
|-----|---------------|---------------|---------------|
| C1  | 0.2711742204  | -1.6529060578 | 6.4374068090  |
| C2  | 0.2554410770  | -1.6175174112 | 5.0429135628  |
| C3  | 0.2789418396  | -0.3925335128 | 4.3763043307  |
| C4  | 0.3366317447  | 0.8014332635  | 5.0961097857  |
| C5  | 0.3416364379  | 0.7625005292  | 6.4882694564  |
| C6  | 1.6215921149  | 1.6343519240  | 8.8787860464  |
| C7  | 2.6503315233  | 2.3917811248  | 9.4296077129  |
| C8  | 3.4784123978  | 1.8333654342  | 10.4035757990 |
| C9  | 3.2921478371  | 0.5098212395  | 10.8016630130 |
| C10 | 2.2687346240  | -0.2534271318 | 10.2377249723 |
| C11 | 1.4225355606  | 0.3076160037  | 9.2832107094  |
| C12 | 0.3024369972  | -0.4646763003 | 7.1654330723  |
| H13 | 0.2481912881  | -2.6054143976 | 6.9633985244  |
| H14 | 0.2221731355  | -2.5464491391 | 4.4787113594  |
| H15 | 0.2627568110  | -0.3660141481 | 3.2896080061  |
| H16 | 0.3681732503  | 1.7716331269  | 4.6072731890  |
| H17 | 2.8009493900  | 3.4092158819  | 9.0793745634  |
| H18 | 4.2776390519  | 2.4256952544  | 10.8416613022 |
| H19 | 3.9442130887  | 0.0694835854  | 11.5519105577 |
| H20 | 2.1211413557  | -1.2861429111 | 10.5480818312 |
| C21 | -3.1770333227 | 0.6177005701  | 10.0705282735 |
| C22 | -3.2136291301 | 1.9323150771  | 9.6125433199  |
| C23 | -2.1429978119 | 2.4561366670  | 8.8783753518  |
| C24 | -1.0280993660 | 1.6732609045  | 8.5889530337  |
| C25 | -1.0106441222 | 0.3506754785  | 9.0556149288  |
| C26 | -2.0645055581 | -0.1810198613 | 9.7899390246  |
| H27 | -4.0079092629 | 0.2121991454  | 10.6430174202 |

|     |               |               |               |
|-----|---------------|---------------|---------------|
| H28 | -4.0780056636 | 2.5563490796  | 9.8289683618  |
| H29 | -2.1602881133 | 3.4845251684  | 8.5270576308  |
| H30 | -2.0228660260 | -1.2114728485 | 10.1402308699 |
| C31 | 0.2376380121  | -0.4387264798 | 8.6868268509  |
| H32 | 0.1938953347  | -1.4595938237 | 9.0824969252  |
| N33 | 0.0534897922  | 3.8401168590  | 7.5382749800  |
| P34 | 0.5133870052  | 2.2581648014  | 7.5578726587  |
| F35 | 1.9513232360  | 2.6249017677  | 6.6307061629  |
| C36 | -0.2418919292 | 4.4304648246  | 6.3823034012  |
| O37 | -0.3893710847 | 3.8873688394  | 5.2663366781  |
| C38 | -0.4582087184 | 5.9639590576  | 6.4556578874  |
| C39 | -1.8745159156 | 6.2661187465  | 5.9509461118  |
| H40 | -2.0486044557 | 7.3506409060  | 5.9161140371  |
| H41 | -2.0134830129 | 5.8476400779  | 4.9500856047  |
| H42 | -2.6264217366 | 5.8205601579  | 6.6144568988  |
| C43 | -0.2796568467 | 6.5229952675  | 7.8668738722  |
| H44 | -0.4358965308 | 7.6114009973  | 7.8615509981  |
| H45 | -0.9905795134 | 6.0686645509  | 8.5644993815  |
| H46 | 0.7246720555  | 6.3115339226  | 8.2461875917  |
| C47 | 0.5644289210  | 6.6096349863  | 5.5111806190  |
| H48 | 0.4343219444  | 7.7007951534  | 5.4925420529  |
| H49 | 1.5865033523  | 6.3883765493  | 5.8407257770  |
| H50 | 0.4421143877  | 6.2160330035  | 4.4981116141  |

### 10-He8-ring complex at 1.7 Å

E(BP86/6-31G\*) = -1422.2361642597

He1 2.0197999952 1.8632999973 11.4447000195



|     |               |               |               |
|-----|---------------|---------------|---------------|
| He2 | 6.2279998128  | 3.2546000475  | 9.1306999956  |
| He3 | 4.8859999874  | 0.1785000004  | 10.2417999808 |
| He4 | 3.3618000466  | 4.9395000164  | 10.3336000049 |
| He5 | 3.1955000060  | 0.3896000013  | 11.1134000113 |
| He6 | 5.0726001167  | 4.7343999719  | 9.5021000294  |
| He7 | 6.1504000476  | 1.3674000254  | 9.4372000064  |
| He8 | 2.0973999787  | 3.7504999936  | 11.1381999551 |
| X9  | 4.1239000000  | 2.5590000000  | 10.2877000000 |
| C10 | -0.2777530067 | -0.8057800520 | 5.8348235087  |
| C11 | -0.4543617251 | 0.0287267043  | 4.7176765880  |
| C12 | 0.1404350060  | 1.2939720878  | 4.7057005941  |
| C13 | 0.9292914572  | 1.7221491406  | 5.7903406641  |
| C14 | 1.1486924827  | 0.8816653282  | 6.8852023196  |
| C15 | 3.0035402294  | -0.4421738037 | 8.3432799265  |
| C16 | 4.3706774332  | -0.5904283893 | 8.0706853530  |
| C17 | 4.9053244073  | -1.8721894680 | 7.8692228302  |
| C18 | 4.0732639242  | -3.0005335914 | 7.9243961308  |
| C19 | 2.6902826016  | -2.8457659039 | 8.1098225055  |
| C20 | 2.1496094009  | -1.5641047189 | 8.2855534558  |
| C21 | 0.5079569477  | -0.3911549220 | 6.9162511767  |
| H22 | -0.7639269343 | -1.7885257758 | 5.8723966396  |
| H23 | -1.0687305147 | -0.3066778331 | 3.8747416950  |
| H24 | -0.0114596741 | 1.9692238063  | 3.8560256514  |
| H25 | 1.3462069564  | 2.7241981999  | 5.7846277938  |
| H26 | 5.0030540573  | 0.2974810228  | 8.0197782563  |
| H27 | 5.9755541555  | -1.9877275852 | 7.6642123570  |
| H28 | 4.4947469107  | -4.0021177754 | 7.7811361589  |
| H29 | 2.0248626257  | -3.7171798871 | 8.0752931308  |
| C30 | -1.6908435255 | 0.1206568900  | 10.8661715179 |
| C31 | -1.1976149580 | 1.4306286656  | 10.9650415049 |

|     |               |               |               |
|-----|---------------|---------------|---------------|
| C32 | -0.0276014009 | 1.7977945267  | 10.2826626628 |
| C33 | 0.6650821689  | 0.8438757430  | 9.5218598243  |
| C34 | 0.1053603811  | -0.4393106027 | 9.3267504160  |
| C35 | -1.0547758275 | -0.8056657217 | 10.0252444788 |
| H36 | -2.5983564109 | -0.1691471396 | 11.4080773526 |
| H37 | -1.7296276318 | 2.1763654406  | 11.5659981425 |
| H38 | 0.3422150493  | 2.8234602835  | 10.3234938373 |
| H39 | -1.4834884303 | -1.8046062959 | 9.8768780577  |
| C40 | 0.6628200854  | -1.2696717046 | 8.1759850217  |
| H41 | 0.0876608535  | -2.2043031045 | 8.0609703058  |
| P42 | 2.1595329057  | 1.1877736340  | 8.4648537101  |
| N43 | 3.3660000089  | 2.3453999462  | 8.7809999971  |
| C44 | 2.8166185563  | 3.4774528592  | 8.1226330773  |
| O45 | 1.5754791887  | 3.6886892161  | 8.1224047969  |
| C46 | 3.6515894118  | 4.4784799287  | 7.2068145274  |
| C47 | 2.9665808481  | 4.4338543513  | 5.8074992693  |
| H48 | 3.4185283758  | 5.2133451414  | 5.1677512686  |
| H49 | 3.1329858749  | 3.4650481244  | 5.3043677639  |
| H50 | 1.8864797923  | 4.6349644221  | 5.8880870704  |
| C51 | 5.1363489486  | 4.1329780685  | 6.9433615102  |
| H52 | 5.4285661283  | 4.5187869075  | 5.9495001102  |
| H53 | 5.8272643881  | 4.5805613599  | 7.6665578557  |
| H54 | 5.2938397734  | 3.0417722459  | 6.9408088067  |
| C55 | 3.4645073650  | 5.9403153730  | 7.6952926948  |
| H56 | 3.8503779147  | 6.6326668728  | 6.9241814186  |
| H57 | 2.3914058710  | 6.1503376283  | 7.8412667199  |
| H58 | 3.9915132089  | 6.1658136760  | 8.6319718065  |

### 10-Hes-ring complex at 2.2 Å

E(BP86/6-31G\*) = -1422.269041653

|     |               |               |               |
|-----|---------------|---------------|---------------|
| He1 | 2.0198000000  | 1.8633000000  | 11.4447000000 |
| He2 | 6.2280000074  | 3.2546000010  | 9.1306999956  |
| He3 | 4.8860000000  | 0.1785000000  | 10.2418000000 |
| He4 | 3.3618000000  | 4.9395000000  | 10.3336000000 |
| He5 | 3.1955000000  | 0.3896000000  | 11.1134000000 |
| He6 | 5.0725999955  | 4.7343999960  | 9.5021000017  |
| He7 | 6.1503999989  | 1.3674000006  | 9.4372000033  |
| He8 | 2.0974000000  | 3.7505000000  | 11.1382000000 |
| X9  | 4.1239000000  | 2.5590000000  | 10.2877000000 |
| C10 | 0.0347255096  | -1.2379137661 | 5.3864612581  |
| C11 | -0.1375933385 | -0.4264116173 | 4.2525156794  |
| C12 | 0.3589040971  | 0.8817096857  | 4.2498509862  |
| C13 | 1.0419044309  | 1.3849390733  | 5.3714363827  |
| C14 | 1.2408672232  | 0.5727266920  | 6.4918659797  |
| C15 | 3.1401039645  | -0.5381127243 | 8.0955206698  |
| C16 | 4.5376366749  | -0.5497297043 | 8.0113652332  |
| C17 | 5.2128078052  | -1.7761865832 | 7.9053253415  |
| C18 | 4.4899474665  | -2.9782023816 | 7.8706430986  |
| C19 | 3.0855672202  | -2.9611645655 | 7.8922968604  |
| C20 | 2.4067531561  | -1.7385609738 | 7.9810464286  |
| C21 | 0.7150809375  | -0.7485376484 | 6.5066450619  |
| H22 | -0.3673752625 | -2.2585022689 | 5.4015930700  |
| H23 | -0.6712307906 | -0.8171253071 | 3.3787580861  |
| H24 | 0.2097414751  | 1.5267819229  | 3.3766791910  |
| H25 | 1.3906334725  | 2.4156783162  | 5.3760397879  |
| H26 | 5.0769658511  | 0.3986889116  | 8.0238275401  |
| H27 | 6.3068748836  | -1.7917334419 | 7.8448969284  |

|     |               |               |               |
|-----|---------------|---------------|---------------|
| H28 | 5.0201289866  | -3.9346462287 | 7.7962483841  |
| H29 | 2.5187854992  | -3.8966460310 | 7.8105378011  |
| C30 | -1.6089946183 | -0.4417070998 | 10.4527324351 |
| C31 | -1.2301882032 | 0.9023774556  | 10.5846568443 |
| C32 | -0.0989427557 | 1.3879057901  | 9.9103272436  |
| C33 | 0.6627075089  | 0.5136051655  | 9.1241943236  |
| C34 | 0.2286373973  | -0.8163703282 | 8.9102153224  |
| C35 | -0.8943951794 | -1.2959789159 | 9.5976967493  |
| H36 | -2.4886361955 | -0.8194458710 | 10.9864727860 |
| H37 | -1.8241670350 | 1.5828809769  | 11.2048105516 |
| H38 | 0.1768500704  | 2.4427911255  | 9.9638459779  |
| H39 | -1.2313267334 | -2.3278383613 | 9.4386087476  |
| C40 | 0.9028861743  | -1.5942026415 | 7.7818217396  |
| H41 | 0.4291704411  | -2.5824590490 | 7.6578274659  |
| P42 | 2.1253659551  | 0.9858112337  | 8.0938232908  |
| N43 | 3.1443999983  | 2.2829000024  | 8.3402999995  |
| C44 | 2.4830261614  | 3.3825782351  | 7.7540959813  |
| O45 | 1.2339668576  | 3.4956980124  | 7.7573259549  |
| C46 | 3.2821222370  | 4.4608447783  | 6.9243171941  |
| C47 | 2.6182585940  | 4.5249128066  | 5.5203071546  |
| H48 | 3.0541266517  | 5.3646440610  | 4.9483402385  |
| H49 | 2.8144970288  | 3.6062785340  | 4.9395376252  |
| H50 | 1.5302275282  | 4.6800736656  | 5.6049522707  |
| C51 | 4.7612159957  | 4.1131289739  | 6.6886384805  |
| H52 | 5.2377901915  | 4.9036816612  | 6.0777347614  |
| H53 | 5.3249925722  | 4.0072107262  | 7.6167792997  |
| H54 | 4.8530063349  | 3.1604638535  | 6.1377751528  |
| C55 | 3.0943521495  | 5.8758591374  | 7.5309523164  |
| H56 | 3.4471890215  | 6.6351801129  | 6.8083471576  |
| H57 | 2.0253081064  | 6.0605440468  | 7.7329321614  |

H58      3.6556405604      6.0253917597      8.4603426152

11

$E(M06-2X/6-311+G^{**}) = -2158.15026310439$

$H(M06-2X/6-31+G^*) = -2157.254952$

$E(BP86/6-31G^*) = -2158.387955147$

|     |               |               |               |
|-----|---------------|---------------|---------------|
| C1  | -2.8752171347 | 0.3498195655  | 7.4354549250  |
| C2  | -3.5265824825 | 1.2759169705  | 6.6152580058  |
| C3  | -2.7975681323 | 2.1703237226  | 5.8364283934  |
| C4  | -1.4003977028 | 2.1499883443  | 5.8577036250  |
| C5  | -0.7624329558 | 1.2165583598  | 6.6660009117  |
| C6  | 1.1045819198  | -0.8081709462 | 6.6025175574  |
| C7  | 1.9496776563  | -1.4673510805 | 5.7209568526  |
| C8  | 1.8906369503  | -2.8611747676 | 5.6519599428  |
| C9  | 0.9961002638  | -3.5620387103 | 6.4576667680  |
| C10 | 0.1472195331  | -2.8878362238 | 7.3409966894  |
| C11 | 0.1978839716  | -1.5016244903 | 7.4173551283  |
| C12 | -1.4873252816 | 0.3165123825  | 7.4664388841  |
| H13 | -3.4505556879 | -0.3405879721 | 8.0473406723  |
| H14 | -4.6121440647 | 1.2994249747  | 6.5925922312  |
| H15 | -3.3137290270 | 2.8940561095  | 5.2134100868  |
| H16 | -0.8158667854 | 2.8650510782  | 5.2853748981  |
| H17 | 2.6349697374  | -0.8961231760 | 5.1003108045  |
| H18 | 2.5415656442  | -3.3979821214 | 4.9688485161  |
| H19 | 0.9547873393  | -4.6457064209 | 6.3994239383  |
| H20 | -0.5489446030 | -3.4446007097 | 7.9631593299  |
| C21 | 1.0508245725  | 0.8853662363  | 11.4049519439 |

|     |               |               |               |
|-----|---------------|---------------|---------------|
| C22 | 1.9539341936  | 1.7449450044  | 10.7840079148 |
| C23 | 2.0041112319  | 1.8224190782  | 9.3893962490  |
| C24 | 1.1366563464  | 1.0297018429  | 8.6488547036  |
| C25 | 0.2205275036  | 0.1607297960  | 9.2627317874  |
| C26 | 0.1825640415  | 0.0905018440  | 10.6492837375 |
| H27 | 1.0173155722  | 0.8305448335  | 12.4890382881 |
| H28 | 2.6198554881  | 2.3582724752  | 11.3829760444 |
| H29 | 2.7012263438  | 2.4884075209  | 8.8857131139  |
| H30 | -0.5193404393 | -0.5765059651 | 11.1436662968 |
| C31 | -0.6834459954 | -0.6537498752 | 8.3349976234  |
| H32 | -1.3549084507 | -1.2910960379 | 8.9168324488  |
| P33 | 1.0302835011  | 0.9803511379  | 6.8395394550  |
| N34 | 2.0891635611  | 1.7501905500  | 5.9603648639  |
| P35 | 2.2443846579  | 3.3456434926  | 5.7649501228  |
| O36 | 1.0379443968  | 4.2001345882  | 5.8214700966  |
| O37 | 3.0198898212  | 3.5733611996  | 4.3603764976  |
| O38 | 3.3962622076  | 3.7350748127  | 6.8593480932  |
| C39 | 7.0961633398  | 3.0241813375  | 3.7466035765  |
| C40 | 6.4477647412  | 4.1758031975  | 3.2989742500  |
| C41 | 5.0829826409  | 4.3403385919  | 3.5107251218  |
| C42 | 4.3708398522  | 3.3429273112  | 4.1709866495  |
| C43 | 4.9959737494  | 2.1810902116  | 4.6141540976  |
| C44 | 6.3660517884  | 2.0327503743  | 4.3995307717  |
| H45 | 8.1628403536  | 2.9006228837  | 3.5862558796  |
| H46 | 7.0083953609  | 4.9569661247  | 2.7942016930  |
| H47 | 4.5586096978  | 5.2383376417  | 3.1991350903  |
| H48 | 4.4165838310  | 1.4237720284  | 5.1327374794  |
| H49 | 6.8636649299  | 1.1324106828  | 4.7487266387  |
| C50 | 5.6434849633  | 7.2245087247  | 6.5761788688  |
| C51 | 6.2498409241  | 6.0002483222  | 6.8604584422  |

|     |              |              |              |
|-----|--------------|--------------|--------------|
| C52 | 5.4839213358 | 4.8423267771 | 6.9501186493 |
| C53 | 4.1070787193 | 4.9228048888 | 6.7602605586 |
| C54 | 3.4800786055 | 6.1346211195 | 6.4846288673 |
| C55 | 4.2637543978 | 7.2844718479 | 6.3900953377 |
| H56 | 6.2436333032 | 8.1261232010 | 6.5001766679 |
| H57 | 7.3253569176 | 5.9422447964 | 6.9994155682 |
| H58 | 5.9335567847 | 3.8716475081 | 7.1370025326 |
| H59 | 2.4046631596 | 6.1627543201 | 6.3379140630 |
| H60 | 3.7853334394 | 8.2345996883 | 6.1709372351 |

### 11-H<sup>+</sup>

$$E(M06-2X/6-311+G^{**}) = -2158.527111195$$

$$H(M06-2X/6-31+G^*) = -2157.619910$$

|     |               |               |              |
|-----|---------------|---------------|--------------|
| C1  | -2.7927599750 | 0.5632806479  | 6.6647487119 |
| C2  | -3.1122906860 | 1.3803480408  | 5.5769169056 |
| C3  | -2.1184190859 | 2.0515630239  | 4.8676953007 |
| C4  | -0.7802306002 | 1.9186320440  | 5.2375267193 |
| C5  | -0.4771585936 | 1.0994459744  | 6.3173649575 |
| C6  | 1.1246941070  | -1.0623185423 | 7.0240562141 |
| C7  | 2.0603892197  | -1.9407854222 | 6.4907950205 |
| C8  | 1.8383629556  | -3.3122995060 | 6.6166937602 |
| C9  | 0.6962067217  | -3.7768128106 | 7.2636833134 |
| C10 | -0.2411888152 | -2.8861316832 | 7.7932753104 |
| C11 | -0.0346945157 | -1.5178152415 | 7.6781929796 |
| C12 | -1.4655473808 | 0.4149611072  | 7.0454561834 |
| H13 | -3.5770390257 | 0.0470929820  | 7.2108391736 |
| H14 | -4.1510901953 | 1.4944124325  | 5.2836946149 |

|     |               |               |               |
|-----|---------------|---------------|---------------|
| H15 | -2.3837809165 | 2.6868511645  | 4.0293567800  |
| H16 | -0.0005185367 | 2.4538075046  | 4.7034641284  |
| H17 | 2.9509701450  | -1.5852428819 | 5.9792029563  |
| H18 | 2.5570151046  | -4.0145144686 | 6.2078432251  |
| H19 | 0.5294658329  | -4.8451126921 | 7.3573367633  |
| H20 | -1.1297277039 | -3.2615261772 | 8.2930596169  |
| C21 | 0.1418325923  | 1.3983169579  | 11.3897943990 |
| C22 | 1.2647376137  | 2.0691284471  | 10.9089724246 |
| C23 | 1.6478456956  | 1.9284788178  | 9.5750207238  |
| C24 | 0.8860417473  | 1.1037534181  | 8.7572940544  |
| C25 | -0.2489832389 | 0.4197701407  | 9.2242628199  |
| C26 | -0.6178979111 | 0.5744008255  | 10.5542997984 |
| H27 | -0.1506748552 | 1.5178661028  | 12.4281977800 |
| H28 | 1.8405206683  | 2.7079740758  | 11.5702404086 |
| H29 | 2.5118026657  | 2.4589976841  | 9.1848232179  |
| H30 | -1.4921321821 | 0.0586884029  | 10.9417344481 |
| C31 | -1.0005839756 | -0.4579887290 | 8.2172642769  |
| H32 | -1.8572491734 | -0.9376418541 | 8.6956511417  |
| P33 | 1.1291049514  | 0.7337717014  | 7.0208149823  |
| P34 | 2.6599606672  | 3.0408111748  | 6.1356452118  |
| O35 | 1.4792944036  | 3.6505683147  | 6.7621967232  |
| O36 | 2.8266574972  | 3.3650414650  | 4.5875811385  |
| O37 | 4.0958830291  | 3.2104538952  | 6.8030420655  |
| C38 | 6.4014005830  | 4.3045205270  | 2.6721315943  |
| C39 | 5.4714261561  | 5.3042061494  | 2.9603829201  |
| C40 | 4.2747322845  | 4.9885674415  | 3.5970096378  |
| C41 | 4.0368451859  | 3.6648711248  | 3.9384179801  |
| C42 | 4.9332680311  | 2.6490233792  | 3.6449293056  |
| C43 | 6.1292528041  | 2.9797388592  | 3.0076164930  |
| H44 | 7.3333751411  | 4.5569918100  | 2.1768806192  |



|     |              |              |              |
|-----|--------------|--------------|--------------|
| H45 | 5.6790526426 | 6.3357527181 | 2.6947223710 |
| H46 | 3.5409023803 | 5.7482068038 | 3.8474993666 |
| H47 | 4.6986571659 | 1.6187732139 | 3.8979696959 |
| H48 | 6.8438465196 | 2.1982491537 | 2.7694618789 |
| C49 | 6.1510270120 | 6.8337791131 | 6.7132154104 |
| C50 | 6.8032282384 | 5.6366839864 | 6.4139927997 |
| C51 | 6.1095886023 | 4.4312043486 | 6.4498505114 |
| C52 | 4.7653947762 | 4.4549288721 | 6.7917605238 |
| C53 | 4.0921085349 | 5.6249884988 | 7.1150644234 |
| C54 | 4.8036227968 | 6.8246576265 | 7.0652725096 |
| H55 | 6.6961450691 | 7.7715176880 | 6.6798901982 |
| H56 | 7.8543304732 | 5.6402724422 | 6.1434409003 |
| H57 | 6.5856389368 | 3.4886175668 | 6.1994549003 |
| H58 | 3.0428111222 | 5.6024994481 | 7.3952817671 |
| H59 | 4.2968874814 | 7.7524798994 | 7.3110444702 |
| N60 | 2.4676445460 | 1.3569683013 | 6.2600342250 |
| H61 | 3.2201745071 | 0.7235799935 | 6.0007663582 |

### 11-Me<sup>+</sup>

$$E(\text{M06-2X/6-311+G**}) = -2197.823050155$$

$$H(\text{M06-2X/6-31+G*}) = -2196.875436$$

|    |               |               |              |
|----|---------------|---------------|--------------|
| C1 | -2.6834786672 | 1.0275143375  | 6.4132013932 |
| C2 | -2.8240148205 | 1.6828103871  | 5.1870804652 |
| C3 | -1.7085369334 | 2.0227579736  | 4.4238909716 |
| C4 | -0.4265724894 | 1.7182966536  | 4.8804240784 |
| C5 | -0.3009029885 | 1.0662831536  | 6.1008225295 |
| C6 | 0.8627139565  | -1.2133882983 | 7.1913662535 |

|     |               |               |               |
|-----|---------------|---------------|---------------|
| C7  | 1.5794340477  | -2.3549708190 | 6.8383637640  |
| C8  | 1.0635836680  | -3.6098006086 | 7.1630428712  |
| C9  | -0.1525033265 | -3.7185014116 | 7.8284724440  |
| C10 | -0.8735730485 | -2.5742876266 | 8.1729005480  |
| C11 | -0.3779821989 | -1.3158081827 | 7.8580512315  |
| C12 | -1.4136706611 | 0.7112908134  | 6.8792529577  |
| H13 | -3.5604987224 | 0.7648513190  | 6.9980923367  |
| H14 | -3.8172013803 | 1.9292599004  | 4.8253389590  |
| H15 | -1.8341583877 | 2.5324131332  | 3.4745487275  |
| H16 | 0.4484321421  | 1.9956443879  | 4.2997408031  |
| H17 | 2.5239345828  | -2.2962080090 | 6.3139681880  |
| H18 | 1.6188403323  | -4.5009939701 | 6.8903313500  |
| H19 | -0.5475967680 | -4.6978443846 | 8.0783653423  |
| H20 | -1.8270586587 | -2.6634704542 | 8.6857266549  |
| C21 | 0.2884382987  | 2.0338899607  | 11.1074817119 |
| C22 | 1.5334928228  | 2.3845245165  | 10.5874377548 |
| C23 | 1.9003229258  | 1.9695630354  | 9.3073858357  |
| C24 | 0.9972835255  | 1.2018044334  | 8.5818145964  |
| C25 | -0.2568103607 | 0.8361734339  | 9.0919049739  |
| C26 | -0.6092714411 | 1.2600331900  | 10.3670102827 |
| H27 | 0.0108709566  | 2.3646136295  | 12.1032628507 |
| H28 | 2.2195156901  | 2.9837263322  | 11.1769123875 |
| H29 | 2.8668449709  | 2.2421847329  | 8.8908501996  |
| H30 | -1.5752538779 | 0.9909164690  | 10.7849581071 |
| C31 | -1.1387744756 | -0.0290189992 | 8.1906158183  |
| H32 | -2.0773112816 | -0.2710920548 | 8.6938634148  |
| P33 | 1.2070697734  | 0.5459830458  | 6.9249800272  |
| P34 | 2.9423758855  | 2.5822418953  | 5.9098262750  |
| O35 | 1.7941194650  | 3.3984513521  | 6.3306971842  |
| O36 | 3.3226299870  | 2.5683629345  | 4.3581919058  |

|     |              |               |              |
|-----|--------------|---------------|--------------|
| O37 | 4.3193283993 | 2.7872561817  | 6.6956417277 |
| C38 | 5.7603913318 | 5.5861538400  | 2.8406768931 |
| C39 | 4.5714255151 | 5.9250512218  | 3.4856341519 |
| C40 | 3.7292136345 | 4.9314774877  | 3.9810123337 |
| C41 | 4.1190591552 | 3.6066084661  | 3.8328060078 |
| C42 | 5.2893415481 | 3.2403572017  | 3.1858263607 |
| C43 | 6.1121359048 | 4.2463465987  | 2.6821884025 |
| H44 | 6.4086775461 | 6.3660090596  | 2.4544573131 |
| H45 | 4.2923852324 | 6.9670399464  | 3.6049255412 |
| H46 | 2.7989319569 | 5.1767463268  | 4.4864394113 |
| H47 | 5.5431047498 | 2.1896332547  | 3.0836948558 |
| H48 | 7.0308184557 | 3.9801111339  | 2.1691280231 |
| C49 | 6.0670420077 | 6.5296156399  | 7.2702384731 |
| C50 | 6.7652467578 | 5.5133221677  | 6.6178352213 |
| C51 | 6.1758455220 | 4.2665452679  | 6.4271330127 |
| C52 | 4.8867664522 | 4.0661399345  | 6.8987342636 |
| C53 | 4.1710648942 | 5.0522309142  | 7.5635904083 |
| C54 | 4.7771077786 | 6.2959777167  | 7.7421144643 |
| H55 | 6.5297459061 | 7.5006912514  | 7.4134245150 |
| H56 | 7.7708143394 | 5.6902630699  | 6.2496551807 |
| H57 | 6.6921347478 | 3.4644161353  | 5.9096865714 |
| H58 | 3.1592326759 | 4.8603001109  | 7.9066591731 |
| H59 | 4.2327954014 | 7.0833027912  | 8.2539273445 |
| N60 | 2.6444653132 | 0.9378970584  | 6.1747391386 |
| C61 | 3.6953986839 | -0.0517168405 | 5.8412588612 |
| H62 | 4.5830525000 | 0.4972448945  | 5.5258698551 |
| H63 | 3.9588753169 | -0.6410261369 | 6.7212868258 |
| H64 | 3.3703919257 | -0.6902752456 | 5.0181826826 |

11-F

$$E(M06-2X/6-311+G^{**}) = -2258.075823555$$

$$H(M06-2X/6-31+G^*) = -2257.14976$$

|     |               |               |               |
|-----|---------------|---------------|---------------|
| C1  | -2.6955926338 | -1.4216594361 | 6.9191603565  |
| C2  | -3.6976810911 | -0.8883934303 | 6.1034875208  |
| C3  | -3.5407518975 | 0.3845032575  | 5.5609756960  |
| C4  | -2.3862049008 | 1.1294712059  | 5.8276356297  |
| C5  | -1.3779627593 | 0.6098443639  | 6.6363326028  |
| C6  | 1.2261441520  | 0.0389639918  | 6.5836191946  |
| C7  | 2.3234260065  | 0.0926522980  | 5.7300917116  |
| C8  | 3.0224810005  | -1.0770175430 | 5.4298889639  |
| C9  | 2.6424997186  | -2.2859916157 | 6.0113340786  |
| C10 | 1.5553844650  | -2.3333787565 | 6.8855313437  |
| C11 | 0.8356554202  | -1.1744464125 | 7.1675905884  |
| C12 | -1.5528819406 | -0.6728348843 | 7.1762987390  |
| H13 | -2.8068045449 | -2.4150080722 | 7.3511504048  |
| H14 | -4.5950847016 | -1.4663469892 | 5.8965486707  |
| H15 | -4.3192249550 | 0.8034778043  | 4.9276952121  |
| H16 | -2.2562344483 | 2.1253353516  | 5.4141978853  |
| H17 | 2.6333766874  | 1.0530273555  | 5.3251807972  |
| H18 | 3.8749157884  | -1.0416672739 | 4.7566558129  |
| H19 | 3.1955074747  | -3.1947645282 | 5.7878607363  |
| H20 | 1.2609397309  | -3.2762203469 | 7.3424522438  |
| C21 | -0.3567771627 | 0.4437133669  | 11.5327052340 |
| C22 | -0.1150693599 | 1.7760469689  | 11.1980126290 |
| C23 | 0.0711799370  | 2.1415889568  | 9.8639352034  |
| C24 | -0.0209279253 | 1.1695654610  | 8.8716937984  |
| C25 | -0.2703693441 | -0.1705354782 | 9.1983754516  |
| C26 | -0.4273864380 | -0.5303602722 | 10.5351233758 |

|     |               |               |               |
|-----|---------------|---------------|---------------|
| H27 | -0.4885825628 | 0.1593195188  | 12.5736410597 |
| H28 | -0.0556069445 | 2.5301262955  | 11.9782538924 |
| H29 | 0.3004837166  | 3.1676258262  | 9.5825344403  |
| H30 | -0.6139008445 | -1.5703456368 | 10.7963765695 |
| C31 | -0.4067500626 | -1.1636933957 | 8.0498044559  |
| H32 | -0.6059141854 | -2.1685797684 | 8.4378690935  |
| N33 | -0.1232021482 | 2.8267402185  | 6.2054852694  |
| P34 | 0.5472926066  | 4.2701559482  | 6.3066655174  |
| O35 | 0.6496875064  | 5.0461005010  | 7.5651689548  |
| O36 | -0.3002805764 | 5.2096895817  | 5.2355422171  |
| O37 | 1.9756917238  | 4.1797096992  | 5.4676343767  |
| C38 | -0.1227253927 | 4.9375931015  | 1.0906359537  |
| C39 | -0.1738359953 | 6.1733886275  | 1.7370441514  |
| C40 | -0.2331567405 | 6.2366317659  | 3.1250630167  |
| C41 | -0.2466989705 | 5.0593395392  | 3.8770605657  |
| C42 | -0.2064459413 | 3.8153355206  | 3.2421369815  |
| C43 | -0.1407199981 | 3.7682335209  | 1.8502467139  |
| H44 | -0.0679703316 | 4.8871914351  | 0.0066975392  |
| H45 | -0.1514976478 | 7.0939288099  | 1.1595824978  |
| H46 | -0.2415680716 | 7.1847612659  | 3.6544876645  |
| H47 | -0.2149767927 | 2.9129498397  | 3.8453019839  |
| H48 | -0.1029319678 | 2.8001394705  | 1.3573470789  |
| C49 | 3.9436221383  | 7.5007435782  | 3.9231222831  |
| C50 | 3.8138220456  | 6.3258614801  | 3.1812981817  |
| C51 | 3.1449584691  | 5.2290336860  | 3.7146839495  |
| C52 | 2.6090211640  | 5.3010779237  | 5.0023652374  |
| C53 | 2.7326718387  | 6.4693410382  | 5.7575175217  |
| C54 | 3.3991383425  | 7.5623034314  | 5.2054806211  |
| H55 | 4.4603052749  | 8.3600452451  | 3.5045377192  |
| H56 | 4.2214963458  | 6.2666013636  | 2.1755424995  |

|     |              |              |              |
|-----|--------------|--------------|--------------|
| H57 | 3.0020014127 | 4.3148908401 | 3.1456580359 |
| H58 | 2.2943463677 | 6.5036262032 | 6.7500614446 |
| H59 | 3.4927694462 | 8.4737630436 | 5.7905042522 |
| P60 | 0.2590960206 | 1.5184773576 | 7.0914105264 |
| F61 | 1.7986797919 | 2.2225325958 | 7.5729896189 |

### 11-He8-ring complex at 1.7 Å

E(BP86/6-31G\*) = -2181.474257995

|     |              |               |               |
|-----|--------------|---------------|---------------|
| He1 | 2.0197999498 | 1.8632999890  | 11.4446999196 |
| He2 | 6.2280000760 | 3.2546000214  | 9.1307001511  |
| He3 | 4.8859999848 | 0.1785001905  | 10.2418000133 |
| He4 | 3.3617999032 | 4.9395000011  | 10.3335998496 |
| He5 | 3.1955000232 | 0.3896000072  | 11.1134000502 |
| He6 | 5.0726000363 | 4.7344000102  | 9.5021000721  |
| He7 | 6.1504000036 | 1.3673998737  | 9.4371998190  |
| He8 | 2.0974001058 | 3.7504999751  | 11.1382000945 |
| X9  | 4.1239000000 | 2.5590000000  | 10.2877000000 |
| C10 | 1.0205755206 | -0.6841358194 | 4.8018478619  |
| C11 | 2.0922937379 | -0.5823117671 | 3.9011493279  |
| C12 | 3.2792376681 | 0.0576701273  | 4.2892578726  |
| C13 | 3.3901150562 | 0.6346852511  | 5.5635139491  |
| C14 | 2.3081766571 | 0.5551395382  | 6.4511398843  |
| C15 | 2.0113425510 | -0.5861730595 | 8.8506497760  |
| C16 | 2.8349350911 | -1.4495392828 | 9.5916171818  |
| C17 | 2.4443410464 | -2.7697012917 | 9.8753544012  |

|     |               |               |               |
|-----|---------------|---------------|---------------|
| C18 | 1.2256531316  | -3.2653001394 | 9.4048942940  |
| C19 | 0.4349835692  | -2.4500167059 | 8.5835411973  |
| C20 | 0.8266574868  | -1.1402526323 | 8.2759930700  |
| C21 | 1.1315083669  | -0.1341610380 | 6.0866564041  |
| H22 | 0.1029154261  | -1.2120508889 | 4.5141571688  |
| H23 | 2.0049118532  | -1.0182151666 | 2.8994965222  |
| H24 | 4.1230244413  | 0.1207338854  | 3.5931613430  |
| H25 | 4.3070907162  | 1.1577309812  | 5.8519727794  |
| H26 | 3.8014670957  | -1.1262177539 | 9.9528245722  |
| H27 | 3.1127840236  | -3.4045102318 | 10.4672967872 |
| H28 | 0.9086179262  | -4.2880327625 | 9.6371308556  |
| H29 | -0.4874029181 | -2.8428260608 | 8.1387678559  |
| C30 | -2.1413437519 | 2.5535311083  | 8.3532134773  |
| C31 | -1.1660619848 | 3.3904480889  | 8.9184126884  |
| C32 | 0.1850298106  | 3.0107766007  | 8.9030007581  |
| C33 | 0.5437714775  | 1.7849158029  | 8.3257301913  |
| C34 | -0.4288597230 | 0.9431560883  | 7.7564855900  |
| C35 | -1.7760040364 | 1.3293954015  | 7.7695463155  |
| H36 | -3.1947055865 | 2.8561131769  | 8.3644294574  |
| H37 | -1.4549049467 | 4.3467976299  | 9.3678487800  |
| H38 | 0.9536786185  | 3.6634639794  | 9.3237570576  |
| H39 | -2.5373622755 | 0.6767762132  | 7.3249014436  |
| C40 | 0.0830071613  | -0.3654139628 | 7.1838891207  |
| H41 | -0.7502331587 | -0.9731234431 | 6.7935250380  |
| P42 | 2.2744328117  | 1.1896731083  | 8.2021559088  |
| N43 | 3.3659999174  | 2.3453999317  | 8.7810000307  |
| P44 | 3.3991151305  | 3.4507299152  | 7.4907123236  |
| O45 | 3.2171070768  | 4.9575319697  | 8.1318348865  |
| O46 | 2.4657242780  | 3.2634245530  | 6.3194010810  |
| O47 | 5.0001099948  | 3.4338346182  | 7.0589787074  |

|     |               |              |              |
|-----|---------------|--------------|--------------|
| C48 | 1.3381226599  | 8.3587028019 | 6.5415709746 |
| C49 | 2.5669585786  | 8.4455904253 | 7.2157593194 |
| C50 | 3.1893840112  | 7.2899008518 | 7.7078436009 |
| C51 | 2.5724394264  | 6.0418308323 | 7.5252367980 |
| C52 | 1.3405659776  | 5.9351893356 | 6.8591507046 |
| C53 | 0.7362986567  | 7.1026894068 | 6.3669707567 |
| H54 | 0.8542323488  | 9.2626534281 | 6.1552769825 |
| H55 | 3.0510328702  | 9.4185308124 | 7.3594987850 |
| H56 | 4.1491895942  | 7.3358761342 | 8.2313105157 |
| H57 | 0.8865319685  | 4.9535485011 | 6.7119517638 |
| H58 | -0.2223572013 | 7.0219724334 | 5.8409777615 |
| C59 | 6.7907517388  | 6.1013753450 | 4.3489658553 |
| C60 | 7.4391947514  | 5.7229813946 | 5.5357776618 |
| C61 | 6.8155130223  | 4.8503991216 | 6.4392391148 |
| C62 | 5.5374444791  | 4.3515776560 | 6.1425926531 |
| C63 | 4.8774931392  | 4.7098206956 | 4.9550560827 |
| C64 | 5.5128463530  | 5.5929761911 | 4.0683988014 |
| H65 | 7.2792753113  | 6.7865490319 | 3.6473105568 |
| H66 | 8.4379591869  | 6.1115091893 | 5.7665610371 |
| H67 | 7.3044212831  | 4.5464737340 | 7.3691151886 |
| H68 | 3.8838255571  | 4.3036427693 | 4.7459608395 |
| H69 | 4.9981741365  | 5.8806073385 | 3.1442292722 |

### 11-He<sub>s</sub>-ring complex at 2.2 Å

E(BP86/6-31G\*) = -2181.507275410

|     |              |              |               |
|-----|--------------|--------------|---------------|
| He1 | 2.0198000000 | 1.8633000000 | 11.4447000000 |
| He2 | 6.2280000201 | 3.2546000057 | 9.1307000400  |



|     |               |               |               |
|-----|---------------|---------------|---------------|
| He3 | 4.8859999932  | 0.1785000544  | 10.2417999977 |
| He4 | 3.3618000000  | 4.9395000000  | 10.3336000000 |
| He5 | 3.1955000000  | 0.3896000000  | 11.1134000000 |
| He6 | 5.0726000000  | 4.7344000000  | 9.5021000000  |
| He7 | 6.1503999996  | 1.3673999741  | 9.4371999611  |
| He8 | 2.0974000000  | 3.7505000000  | 11.1382000000 |
| X9  | 4.1239000000  | 2.5590000000  | 10.2877000000 |
| C10 | -0.8961456259 | -0.2350091010 | 5.4181810663  |
| C11 | -0.3027072034 | -0.1941615511 | 4.1457996959  |
| C12 | 0.9695987903  | 0.3691002530  | 3.9871145215  |
| C13 | 1.6479172880  | 0.9228348844  | 5.0866462208  |
| C14 | 1.0466561574  | 0.9068980484  | 6.3527999186  |
| C15 | 1.5807755643  | -0.1924496255 | 8.7460979170  |
| C16 | 2.6326150884  | -1.0314574533 | 9.1269888730  |
| C17 | 2.3569023943  | -2.3330093851 | 9.5785759328  |
| C18 | 1.0345257054  | -2.7939790070 | 9.6325359589  |
| C19 | -0.0151741206 | -1.9787753917 | 9.1759211011  |
| C20 | 0.2536516680  | -0.6877666488 | 8.7050573834  |
| C21 | -0.2248613744 | 0.2958823898  | 6.5266145096  |
| H22 | -1.8817236436 | -0.6969610849 | 5.5550735938  |
| H23 | -0.8334169925 | -0.6141239998 | 3.2837106327  |
| H24 | 1.4439013649  | 0.3911603473  | 2.9996352155  |
| H25 | 2.6160994862  | 1.4056638440  | 4.9512139858  |
| H26 | 3.6586026359  | -0.6733854874 | 9.0574022324  |
| H27 | 3.1815179085  | -2.9869684497 | 9.8831398580  |
| H28 | 0.8189096364  | -3.8052189948 | 9.9956767544  |
| H29 | -1.0426035684 | -2.3618982956 | 9.1521119963  |
| C30 | -2.1722152690 | 3.4057981257  | 9.4913653480  |
| C31 | -1.0037143825 | 4.1826068099  | 9.5219547219  |
| C32 | 0.2173595679  | 3.6393918392  | 9.0900076465  |

|     |               |               |              |
|-----|---------------|---------------|--------------|
| C33 | 0.2464007728  | 2.3162435588  | 8.6302019031 |
| C34 | -0.9283967573 | 1.5387138218  | 8.5692038448 |
| C35 | -2.1400504621 | 2.0850818456  | 9.0116083964 |
| H36 | -3.1211877308 | 3.8337866592  | 9.8341972252 |
| H37 | -1.0406359631 | 5.2164377972  | 9.8824536857 |
| H38 | 1.1365978784  | 4.2317818480  | 9.1075140487 |
| H39 | -3.0588007416 | 1.4871393963  | 8.9713082043 |
| C40 | -0.7842055044 | 0.1530681626  | 7.9546177891 |
| H41 | -1.7561924987 | -0.3672870714 | 7.9318147794 |
| P42 | 1.7457282589  | 1.4800500976  | 7.9987573518 |
| N43 | 3.1444999871  | 2.2828999659  | 8.3406000012 |
| P44 | 3.4870463572  | 3.3865973120  | 7.1436303143 |
| O45 | 3.3609964699  | 4.8560816117  | 7.8981463948 |
| O46 | 2.7280856188  | 3.3868880952  | 5.8414984090 |
| O47 | 5.1111485464  | 3.1543192295  | 6.9644431309 |
| C48 | 2.4943533219  | 8.5907283998  | 6.1936545069 |
| C49 | 3.5965619251  | 8.4208257617  | 7.0464278226 |
| C50 | 3.8924957632  | 7.1584044159  | 7.5794174034 |
| C51 | 3.0737496790  | 6.0654116979  | 7.2545728291 |
| C52 | 1.9615124959  | 6.2183478429  | 6.4101240735 |
| C53 | 1.6849052017  | 7.4876978992  | 5.8797032426 |
| H54 | 2.2669273739  | 9.5781183841  | 5.7765427589 |
| H55 | 4.2362962725  | 9.2743410402  | 7.2985620209 |
| H56 | 4.7487675729  | 7.0050472996  | 8.2423160170 |
| H57 | 1.3487171060  | 5.3492051302  | 6.1615592130 |
| H58 | 0.8215874032  | 7.6115119339  | 5.2154930875 |
| C59 | 7.7631419329  | 5.1435701795  | 4.3859464597 |
| C60 | 8.2203412841  | 4.3897187447  | 5.4787875447 |
| C61 | 7.3102251533  | 3.7454225767  | 6.3267965636 |
| C62 | 5.9318769975  | 3.8546966007  | 6.0749230142 |

|     |              |              |              |
|-----|--------------|--------------|--------------|
| C63 | 5.4573885415 | 4.5923356335 | 4.9766773467 |
| C64 | 6.3847256935 | 5.2375066564 | 4.1437270563 |
| H65 | 8.4765512205 | 5.6495923354 | 3.7261558713 |
| H66 | 9.2945392252 | 4.3020645897 | 5.6788410984 |
| H67 | 7.6487902264 | 3.1540257551 | 7.1819256440 |
| H68 | 4.3846435529 | 4.6460328775 | 4.7741283279 |
| H69 | 6.0151630366 | 5.8174203652 | 3.2900990538 |

## 12

$$E(M06-2X/6-311+G^{**}) = -2261.734802708$$

$$H(M06-2X/6-31+G^*) = -2261.73480270839$$

$$E(BP86/6-31G^*) = -2262.024470782$$

|     |               |               |               |
|-----|---------------|---------------|---------------|
| C1  | -0.9135887972 | -0.9698017055 | 5.4066405007  |
| C2  | -0.4245152573 | -0.8413590506 | 4.1037224050  |
| C3  | 0.6409575759  | 0.0106375316  | 3.8278655921  |
| C4  | 1.2405748984  | 0.7470088543  | 4.8531564695  |
| C5  | 0.7544385633  | 0.6066005963  | 6.1483438637  |
| C6  | 1.5340700844  | -0.0172057195 | 8.7208414113  |
| C7  | 2.6612493819  | -0.3473817348 | 9.4600888957  |
| C8  | 2.6257781678  | -1.4964647213 | 10.2531374972 |
| C9  | 1.4771072815  | -2.2834670094 | 10.2919683590 |
| C10 | 0.3473615843  | -1.9405761865 | 9.5428537203  |
| C11 | 0.3718481085  | -0.7998975507 | 8.7502872277  |
| C12 | -0.3275031219 | -0.2446382718 | 6.4365492149  |
| H13 | -1.7497816083 | -1.6322498736 | 5.6154324071  |
| H14 | -0.8856294900 | -1.4087910608 | 3.3006783515  |
| H15 | 1.0058573812  | 0.1122652229  | 2.8107941613  |

|     |               |               |               |
|-----|---------------|---------------|---------------|
| H16 | 2.0507418181  | 1.4412636546  | 4.6492379674  |
| H17 | 3.5417394934  | 0.2874858472  | 9.4121967505  |
| H18 | 3.4945947005  | -1.7751876010 | 10.8412560612 |
| H19 | 1.4563257718  | -3.1746921608 | 10.9121074129 |
| H20 | -0.5446209291 | -2.5605817493 | 9.5808325843  |
| C21 | -2.7051471533 | 2.7375617803  | 9.2286802639  |
| C22 | -1.7173777477 | 3.7147165498  | 9.1473842596  |
| C23 | -0.4445722904 | 3.3944575518  | 8.6671735397  |
| C24 | -0.1937389608 | 2.0840687676  | 8.2770831249  |
| C25 | -1.1843554389 | 1.0892604211  | 8.3496684569  |
| C26 | -2.4441370895 | 1.4230856050  | 8.8297376879  |
| H27 | -3.6910493425 | 2.9964543106  | 9.6034355635  |
| H28 | -1.9348554463 | 4.7330285846  | 9.4544581670  |
| H29 | 0.3350064968  | 4.1471542102  | 8.5805406843  |
| H30 | -3.2214366963 | 0.6657286119  | 8.8940146729  |
| C31 | -0.7957483632 | -0.3173778269 | 7.8906776594  |
| H32 | -1.6468813386 | -0.9975191218 | 7.9823521633  |
| P33 | 1.3788389472  | 1.4271207958  | 7.6485867444  |
| N34 | 2.7314178596  | 2.2683204949  | 7.6812793078  |
| S35 | 2.9723560382  | 3.6502624873  | 6.8629725973  |
| O36 | 2.2350657934  | 4.7623876285  | 7.4696962725  |
| O37 | 2.7313624951  | 3.4662750635  | 5.4264063687  |
| C38 | 7.4568281693  | 4.5735821903  | 7.1053273807  |
| C39 | 6.5731237434  | 5.1415808075  | 8.0207757410  |
| C40 | 5.2175346602  | 4.8093117726  | 8.0673978203  |
| C41 | 4.7422802778  | 3.8958072987  | 7.1014139081  |
| C42 | 5.6245199153  | 3.2034900895  | 6.2473068720  |
| C43 | 6.9695112422  | 3.5816654304  | 6.2607510109  |
| H44 | 6.9497128830  | 5.8712446667  | 8.7332599540  |
| C45 | 4.3796206738  | 5.4321308279  | 9.1823895922  |

|     |               |               |               |
|-----|---------------|---------------|---------------|
| C46 | 5.2316749058  | 2.0392149279  | 5.3421447119  |
| H47 | 7.6619280197  | 3.0824569720  | 5.5864976556  |
| C48 | 8.9119900209  | 4.9961082880  | 7.0570725375  |
| H49 | 9.3973958439  | 4.4031691653  | 6.2712194532  |
| C50 | 9.0450402554  | 6.4770195730  | 6.6833201878  |
| H51 | 8.5941300814  | 7.1143430320  | 7.4520934250  |
| H52 | 10.0999624965 | 6.7575179382  | 6.5912932551  |
| H53 | 8.5449957860  | 6.6920966300  | 5.7342193568  |
| C54 | 5.2273288429  | 2.4564853115  | 3.8679971209  |
| C55 | 6.1474683659  | 0.8285682757  | 5.5727957400  |
| H56 | 4.2249426566  | 1.7162544862  | 5.6036423716  |
| H57 | 3.4567195985  | 4.8629597574  | 9.2836061071  |
| C58 | 5.0977892986  | 5.3610660575  | 10.5377560557 |
| C59 | 4.0068262773  | 6.8795822986  | 8.8434395017  |
| H60 | 5.7640851986  | -0.0314325918 | 5.0130672402  |
| H61 | 7.1722833683  | 1.0104093978  | 5.2317521296  |
| H62 | 6.1839932620  | 0.5576455089  | 6.6332445200  |
| H63 | 4.9206217927  | 1.6140837112  | 3.2366671520  |
| H64 | 4.5333640433  | 3.2847937389  | 3.7055631273  |
| H65 | 6.2296023423  | 2.7672438270  | 3.5487564229  |
| H66 | 10.6906649773 | 4.9571556660  | 8.3080452532  |
| C67 | 9.6277546715  | 4.7027496309  | 8.3806934211  |
| H68 | 9.1971072398  | 5.2949088388  | 9.1955889150  |
| H69 | 9.5420836950  | 3.6461432302  | 8.6515758115  |
| H70 | 3.3958772191  | 7.3121794368  | 9.6441456350  |
| H71 | 4.9095336463  | 7.4939854648  | 8.7366451264  |
| H72 | 3.4374057742  | 6.9251906940  | 7.9123264068  |
| H73 | 4.4021180765  | 5.6570852585  | 11.3304936109 |
| H74 | 5.4492349083  | 4.3466076595  | 10.7529518213 |

## 12-H<sup>+</sup>

$$E(\text{M06-2X/6-311+G**}) = -2262.114074290$$

$$H(\text{M06-2X/6-31+G*}) = -2261.021577$$

|     |               |               |               |
|-----|---------------|---------------|---------------|
| C1  | -0.6119907249 | -1.0579955406 | 5.3297367438  |
| C2  | -0.0200438781 | -0.9144581896 | 4.0730350202  |
| C3  | 1.0647024647  | -0.0612155791 | 3.8952384900  |
| C4  | 1.5796357011  | 0.6617509145  | 4.9715777765  |
| C5  | 0.9931586443  | 0.5018034022  | 6.2227089816  |
| C6  | 1.5322467893  | -0.1945314252 | 8.8709254872  |
| C7  | 2.5982277256  | -0.5684703480 | 9.6810649154  |
| C8  | 2.4822638380  | -1.7370094451 | 10.4348673052 |
| C9  | 1.3222958843  | -2.5044562493 | 10.3598763117 |
| C10 | 0.2633906711  | -2.1270707931 | 9.5295402475  |
| C11 | 0.3620157128  | -0.9647392374 | 8.7765836985  |
| C12 | -0.1132348834 | -0.3524111675 | 6.4169530470  |
| H13 | -1.4643145421 | -1.7188301721 | 5.4606054386  |
| H14 | -0.4164980397 | -1.4687399829 | 3.2283594681  |
| H15 | 1.5104043693  | 0.0566566943  | 2.9129971528  |
| H16 | 2.3974790236  | 1.3564171716  | 4.8249523923  |
| H17 | 3.5125823288  | 0.0174540323  | 9.7234628598  |
| H18 | 3.3003841142  | -2.0481322938 | 11.0758191361 |
| H19 | 1.2407479149  | -3.4120378462 | 10.9494467624 |
| H20 | -0.6319304535 | -2.7395871916 | 9.4713971956  |
| C21 | -2.7734599170 | 2.5510433023  | 9.0393389244  |
| C22 | -1.7904073840 | 3.5361422685  | 9.0782417969  |
| C23 | -0.4757780362 | 3.2371639285  | 8.7152875961  |
| C24 | -0.1854002791 | 1.9354674216  | 8.3196757312  |

|     |               |               |              |
|-----|---------------|---------------|--------------|
| C25 | -1.1678669904 | 0.9298424769  | 8.2728936897 |
| C26 | -2.4687564938 | 1.2471366446  | 8.6372109921 |
| H27 | -3.7920812347 | 2.7968221878  | 9.3225248991 |
| H28 | -2.0441562829 | 4.5447881522  | 9.3870336119 |
| H29 | 0.2932204082  | 4.0036884405  | 8.7269285616 |
| H30 | -3.2443681322 | 0.4868672930  | 8.6089518136 |
| C31 | -0.7197059797 | -0.4610564347 | 7.8200969815 |
| H32 | -1.5676811893 | -1.1490101041 | 7.8081200037 |
| P33 | 1.3976893973  | 1.2519895540  | 7.8114217230 |
| S34 | 3.0106281427  | 3.6960965053  | 7.1696749042 |
| O35 | 2.3119808322  | 4.7062668395  | 7.9376561976 |
| O36 | 2.5412264653  | 3.3965086832  | 5.8307548582 |
| C37 | 7.4475341969  | 4.6489014527  | 6.9412831310 |
| C38 | 6.6557275300  | 5.2301155742  | 7.9314840660 |
| C39 | 5.3197128256  | 4.8915034802  | 8.1370757833 |
| C40 | 4.7715769372  | 3.9278867474  | 7.2485199135 |
| C41 | 5.5671703517  | 3.2209953618  | 6.3142347145 |
| C42 | 6.8946125443  | 3.6230381746  | 6.1786636908 |
| H43 | 7.0968493728  | 5.9833057700  | 8.5769536656 |
| C44 | 4.6039606969  | 5.5730729308  | 9.3039863269 |
| C45 | 5.1003404125  | 2.0321962239  | 5.4807937725 |
| H46 | 7.5228259203  | 3.1172329371  | 5.4503326552 |
| C47 | 8.8791854918  | 5.0950609468  | 6.7337120121 |
| H48 | 9.2898256047  | 4.5023007981  | 5.9070702802 |
| C49 | 8.9393378411  | 6.5753985794  | 6.3358067053 |
| H50 | 8.5707771651  | 7.2153105649  | 7.1453017099 |
| H51 | 9.9724120198  | 6.8679441131  | 6.1247303775 |
| H52 | 8.3365547002  | 6.7750940567  | 5.4449171940 |
| C53 | 4.8954873239  | 2.4248528586  | 4.0129509722 |
| C54 | 6.0741176831  | 0.8511980623  | 5.6030910024 |

|     |               |               |               |
|-----|---------------|---------------|---------------|
| H55 | 4.1497903652  | 1.6788303703  | 5.8800451730  |
| H56 | 3.7197301806  | 4.9943181760  | 9.5700052709  |
| C57 | 5.4836168131  | 5.6301280798  | 10.5618657147 |
| C58 | 4.1436216340  | 6.9822155150  | 8.9071951937  |
| H59 | 5.6363105439  | -0.0297112674 | 5.1226395755  |
| H60 | 7.0296793282  | 1.0491162961  | 5.1087627350  |
| H61 | 6.2771852816  | 0.6054007733  | 6.6503555198  |
| H62 | 4.5636519736  | 1.5562240724  | 3.4325213178  |
| H63 | 4.1520056492  | 3.2195409818  | 3.9118587783  |
| H64 | 5.8361984092  | 2.7743470379  | 3.5737848829  |
| H65 | 10.7726448374 | 5.0972704077  | 7.7939137675  |
| C66 | 9.7293790965  | 4.8260248931  | 7.9820735445  |
| H67 | 9.3788919782  | 5.4218784552  | 8.8322729498  |
| H68 | 9.6950561990  | 3.7707855265  | 8.2696486934  |
| H69 | 3.6176331779  | 7.4548009085  | 9.7428531884  |
| H70 | 5.0081269944  | 7.6069370788  | 8.6552151245  |
| H71 | 3.4702063296  | 6.9583717870  | 8.0474275530  |
| H72 | 4.8701413087  | 5.9497365954  | 11.4098380461 |
| H73 | 5.9167274811  | 4.6537821140  | 10.8019656399 |
| H74 | 6.3005243867  | 6.3520639374  | 10.4704062792 |
| N75 | 2.7815653372  | 2.1769071940  | 7.9918407587  |
| H76 | 3.1210414533  | 2.2092860149  | 8.9565010129  |

## 12-Me<sup>+</sup>

$$E(\text{M06-2X/6-311+G}^{**}) = -2301.412304985$$

$$H(\text{M06-2X/6-31+G}^{*}) = \text{xxxx}$$



|     |               |               |               |
|-----|---------------|---------------|---------------|
| C1  | -0.6584272642 | -0.7517035854 | 5.1600265321  |
| C2  | -0.2257027490 | -0.3846296962 | 3.8848323701  |
| C3  | 0.7723678098  | 0.5708003754  | 3.7339951334  |
| C4  | 1.3470431204  | 1.1802052330  | 4.8504139454  |
| C5  | 0.9139104447  | 0.8101807204  | 6.1198155012  |
| C6  | 1.8039446604  | -0.2628631410 | 8.5127932489  |
| C7  | 3.0185154631  | -0.6793520917 | 9.0476505393  |
| C8  | 3.1213295381  | -1.9841064765 | 9.5306518338  |
| C9  | 2.0246908912  | -2.8416605463 | 9.4664400114  |
| C10 | 0.8178869085  | -2.4210838563 | 8.9018925908  |
| C11 | 0.7027579948  | -1.1256203131 | 8.4145800874  |
| C12 | -0.0959703587 | -0.1678396656 | 6.2876400958  |
| H13 | -1.4378656779 | -1.4993194592 | 5.2782923939  |
| H14 | -0.6736820415 | -0.8475091655 | 3.0113395973  |
| H15 | 1.1069712031  | 0.8612782035  | 2.7434166838  |
| H16 | 2.0984220016  | 1.9457709247  | 4.7209217630  |
| H17 | 3.8729472695  | -0.0087579393 | 9.0818359998  |
| H18 | 4.0584380028  | -2.3301740087 | 9.9542015836  |
| H19 | 2.1115522465  | -3.8539712435 | 9.8483092034  |
| H20 | -0.0232996612 | -3.1049406941 | 8.8354147046  |
| C21 | -2.6971542873 | 1.9803172936  | 9.5834695307  |
| C22 | -1.8093641723 | 3.0517654513  | 9.6644474982  |
| C23 | -0.5230630653 | 2.9394980848  | 9.1344419422  |
| C24 | -0.1648026720 | 1.7353280322  | 8.5367560894  |
| C25 | -1.0524930910 | 0.6546927547  | 8.4325817928  |
| C26 | -2.3285187791 | 0.7818755713  | 8.9644574894  |
| H27 | -3.6950055203 | 2.0793783764  | 9.9992245169  |
| H28 | -2.1194340573 | 3.9793128286  | 10.1341902020 |
| H29 | 0.1705264384  | 3.7769809034  | 9.1672560172  |
| H30 | -3.0361805928 | -0.0396176044 | 8.8953707690  |

|     |               |               |               |
|-----|---------------|---------------|---------------|
| C31 | -0.5313262072 | -0.5788364706 | 7.6993190646  |
| H32 | -1.3075449419 | -1.3446266897 | 7.6380839006  |
| P33 | 1.4165407627  | 1.3418612804  | 7.7879340869  |
| S34 | 2.9002931190  | 3.8954724528  | 7.3116291277  |
| O35 | 2.2591111770  | 4.9364715460  | 8.0892721642  |
| O36 | 2.4022779827  | 3.6154255972  | 5.9778088338  |
| C37 | 7.4441480463  | 4.3213915220  | 7.0566680035  |
| C38 | 6.7081238035  | 5.1704869157  | 7.8817066862  |
| C39 | 5.3298011041  | 5.0584286493  | 8.0625622488  |
| C40 | 4.6790132645  | 4.0265069309  | 7.3322201683  |
| C41 | 5.3947466273  | 3.0959407776  | 6.5393425308  |
| C42 | 6.7710509668  | 3.2836957656  | 6.4197317178  |
| H43 | 7.2305358642  | 5.9610259129  | 8.4100139539  |
| C44 | 4.6663605717  | 6.0730377878  | 8.9945369976  |
| C45 | 4.8030038526  | 1.8991375673  | 5.7980918516  |
| H46 | 7.3400830573  | 2.5961955525  | 5.7998681069  |
| C47 | 8.9340219218  | 4.5180399853  | 6.8733420799  |
| H48 | 9.2891610653  | 3.7221632585  | 6.2069181378  |
| C49 | 9.2270395789  | 5.8667210008  | 6.2035437158  |
| H50 | 8.9144599600  | 6.6988356209  | 6.8443262634  |
| H51 | 10.3004354512 | 5.9725396890  | 6.0192969921  |
| H52 | 8.7029575538  | 5.9604701462  | 5.2477598477  |
| C53 | 4.7679951150  | 2.1637667777  | 4.2879164258  |
| C54 | 5.5609075572  | 0.6036411826  | 6.1177090820  |
| H55 | 3.7787560389  | 1.7355618884  | 6.1251467334  |
| H56 | 3.7781367222  | 5.6212730979  | 9.4337353656  |
| C57 | 5.5682122591  | 6.4911682791  | 10.1637910749 |
| C58 | 4.2267789279  | 7.3112731302  | 8.1989902977  |
| H59 | 5.0115507842  | -0.2506545602 | 5.7081296001  |
| H60 | 6.5624577018  | 0.5895469679  | 5.6781121696  |

|     |               |              |               |
|-----|---------------|--------------|---------------|
| H61 | 5.6665669812  | 0.4590754520 | 7.1981252292  |
| H62 | 4.3388302354  | 1.3028763960 | 3.7629036162  |
| H63 | 4.1710999167  | 3.0515849259 | 4.0577440235  |
| H64 | 5.7787548905  | 2.3224812779 | 3.8975569607  |
| H65 | 10.7600649818 | 4.4722073264 | 8.0442969700  |
| C66 | 9.6809469792  | 4.3921033993 | 8.2069124007  |
| H67 | 9.3894383581  | 5.1901662517 | 8.8987545466  |
| H68 | 9.4767945604  | 3.4319452699 | 8.6906478268  |
| H69 | 3.7343328054  | 8.0281094157 | 8.8635714736  |
| H70 | 5.0991498334  | 7.8032440188 | 7.7539474651  |
| H71 | 3.5272884642  | 7.0553290093 | 7.3995758191  |
| H72 | 4.9651737955  | 7.0376879702 | 10.8950035872 |
| H73 | 6.0148761975  | 5.6282081617 | 10.6688617660 |
| H74 | 6.3742971194  | 7.1634306102 | 9.8536947925  |
| N75 | 2.6366654751  | 2.4224636728 | 8.1847903591  |
| C76 | 2.9463033071  | 2.5594415838 | 9.6338153759  |
| H77 | 2.4500080411  | 3.4415494026 | 10.0450048643 |
| H78 | 2.6062340387  | 1.6763546683 | 10.1755763464 |
| H79 | 4.0305109469  | 2.6519772020 | 9.7457329207  |

**12-F**

$$E(M06-2X/6-311+G^{**}) = -2361.6713539541$$

$$H(M06-2X/6-31+G^*) = -2360.562273$$

|    |              |               |              |
|----|--------------|---------------|--------------|
| C1 | 0.1882778143 | -1.6113753293 | 6.3799170547 |
| C2 | 0.2708076508 | -1.5757451032 | 4.9867051752 |
| C3 | 0.5304191237 | -0.3736699921 | 4.3288106082 |
| C4 | 0.7206430153 | 0.7990856203  | 5.0610102165 |

|     |               |               |               |
|-----|---------------|---------------|---------------|
| C5  | 0.6185714768  | 0.7616543504  | 6.4482197286  |
| C6  | 1.8469762716  | 1.4912260468  | 8.9004504079  |
| C7  | 2.9575157098  | 2.0907129564  | 9.4918534464  |
| C8  | 3.6459131636  | 1.4248686407  | 10.5067071136 |
| C9  | 3.2512951471  | 0.1459451589  | 10.8971944216 |
| C10 | 2.1592914927  | -0.4675521660 | 10.2824466558 |
| C11 | 1.4468482550  | 0.2048552901  | 9.2917960683  |
| C12 | 0.3520761796  | -0.4404996566 | 7.1169834571  |
| H13 | -0.0135989932 | -2.5495864679 | 6.8931847723  |
| H14 | 0.1330514097  | -2.4898836603 | 4.4147704429  |
| H15 | 0.5973995586  | -0.3514933552 | 3.2443350713  |
| H16 | 0.9586522898  | 1.7416861627  | 4.5725563489  |
| H17 | 3.2905029015  | 3.0684318191  | 9.1495006824  |
| H18 | 4.5006885001  | 1.9001761523  | 10.9802680097 |
| H19 | 3.7967366999  | -0.3784204843 | 11.6776503881 |
| H20 | 1.8541307072  | -1.4691025546 | 10.5794806695 |
| C21 | -3.0716762433 | 1.1531768182  | 9.8864359686  |
| C22 | -2.9091047657 | 2.4576492919  | 9.4270219611  |
| C23 | -1.7600371774 | 2.8219990942  | 8.7165354489  |
| C24 | -0.7596476646 | 1.8855077609  | 8.4607482717  |
| C25 | -0.9369107074 | 0.5771229477  | 8.9339745206  |
| C26 | -2.0769577756 | 0.2045486333  | 9.6372830796  |
| H27 | -3.9667596326 | 0.8715776770  | 10.4357295479 |
| H28 | -3.6817204124 | 3.1987450945  | 9.6180779607  |
| H29 | -1.6281925174 | 3.8336870071  | 8.3441362206  |
| H30 | -2.1888175909 | -0.8188788529 | 9.9910234987  |
| C31 | 0.2050414136  | -0.3818106218 | 8.6321335239  |
| H32 | -0.0014098151 | -1.3802102725 | 9.0328113264  |
| N33 | 0.4189759811  | 3.7734661780  | 7.2139837649  |
| S34 | 1.2260479369  | 4.8903269023  | 6.3909698135  |

|     |              |              |               |
|-----|--------------|--------------|---------------|
| O35 | 0.4505646199 | 6.1386091111 | 6.4589737451  |
| O36 | 1.6064609009 | 4.4836091418 | 5.0325073145  |
| C37 | 4.8692065645 | 5.7295966318 | 9.1391538704  |
| C38 | 3.5577569766 | 5.9277159903 | 9.5576428277  |
| C39 | 2.4625348322 | 5.6833058803 | 8.7240598926  |
| C40 | 2.7084303612 | 5.2174637497 | 7.4127103493  |
| C41 | 4.0250128399 | 4.9797558876 | 6.9633605101  |
| C42 | 5.0747157803 | 5.2565093377 | 7.8469830919  |
| H43 | 3.3676362563 | 6.2773981169 | 10.5705226697 |
| C44 | 1.0829751114 | 5.9399059790 | 9.3336072839  |
| C45 | 4.3772171447 | 4.4762051120 | 5.5679606392  |
| H46 | 6.0970558818 | 5.0856318323 | 7.5198837991  |
| C47 | 6.0434229259 | 5.9603026936 | 10.0704429432 |
| H48 | 6.9533826554 | 5.9486248717 | 9.4548730935  |
| C49 | 5.9768415751 | 7.3154451309 | 10.7811679544 |
| H50 | 5.1224197581 | 7.3621280803 | 11.4655613885 |
| H51 | 6.8844690615 | 7.4847196605 | 11.3724157433 |
| H52 | 5.8735380684 | 8.1329555929 | 10.0607260503 |
| C53 | 4.4358460421 | 5.6549759100 | 4.5874717679  |
| C54 | 5.6804920057 | 3.6734457089 | 5.5201270563  |
| H55 | 3.5787357693 | 3.8101541745 | 5.2494337012  |
| H56 | 0.3129502622 | 5.6896776556 | 8.6109556427  |
| C57 | 0.8411657826 | 5.0531083443 | 10.5600025775 |
| C58 | 0.9158285246 | 7.4277562953 | 9.6632546994  |
| H59 | 5.7668202805 | 3.1952910077 | 4.5380515725  |
| H60 | 6.5724010652 | 4.2990742356 | 5.6529628485  |
| H61 | 5.6884829276 | 2.8855781534 | 6.2810447319  |
| H62 | 4.6532464567 | 5.2954338349 | 3.5742018518  |
| H63 | 3.4797903086 | 6.1841489172 | 4.5597065747  |
| H64 | 5.2255387721 | 6.3610973819 | 4.8787489880  |

|     |               |              |               |
|-----|---------------|--------------|---------------|
| H65 | 7.0148723937  | 4.9554171134 | 11.7482751506 |
| C66 | 6.1507756654  | 4.8165719915 | 11.0871470786 |
| H67 | 5.2474186183  | 4.7713330195 | 11.7075614205 |
| H68 | 6.2545181306  | 3.8535324623 | 10.5764937686 |
| H69 | -0.0908353117 | 7.6136639493 | 10.0560435524 |
| H70 | 1.6390478977  | 7.7660232063 | 10.4164016602 |
| H71 | 1.0471021340  | 8.0304306505 | 8.7591812321  |
| H72 | -0.1637268789 | 5.2370212816 | 10.9586788228 |
| H73 | 0.9016905202  | 3.9933253288 | 10.2898193275 |
| H74 | 1.5631453968  | 5.2436662262 | 11.3638896124 |
| P75 | 0.8783473335  | 2.2329595234 | 7.5114020570  |
| F76 | 2.4342562223  | 2.4390009190 | 6.7205933016  |

### 12-He8-ring complex at 1.7 Å

$E(\text{BP86/6-31G}^*) = -2285.098791888$

|     |               |              |               |
|-----|---------------|--------------|---------------|
| He1 | 2.0198000211  | 1.8632999921 | 11.4447000052 |
| He2 | 6.2279999486  | 3.2545999825 | 9.1307000627  |
| He3 | 4.8860000000  | 0.1785000000 | 10.2418000000 |
| He4 | 3.3618000498  | 4.9395000140 | 10.3336000990 |
| He5 | 3.1955000000  | 0.3896000000 | 11.1134000000 |
| He6 | 5.0725999818  | 4.7344000133 | 9.5020998903  |
| He7 | 6.1504000000  | 1.3674000000 | 9.4372000000  |
| He8 | 2.0973999725  | 3.7504999944 | 11.1381999586 |
| X9  | 4.1239000000  | 2.5590000000 | 10.2877000000 |
| C10 | -1.3675913151 | 3.8771253698 | 5.8474513331  |
| C11 | -1.3629543642 | 3.0007422235 | 4.7507937967  |
| C12 | -0.3453692907 | 2.0493917953 | 4.6402695050  |

|     |               |              |               |
|-----|---------------|--------------|---------------|
| C13 | 0.6792129882  | 1.9801552459 | 5.6026056878  |
| C14 | 0.6913752816  | 2.8587943292 | 6.6916751422  |
| C15 | 0.4695054117  | 2.7687330948 | 9.3463982051  |
| C16 | 0.2146347288  | 1.6014376545 | 10.0781005876 |
| C17 | -0.9681866439 | 1.4866194882 | 10.8267793257 |
| C18 | -1.9056262365 | 2.5294839849 | 10.8316035901 |
| C19 | -1.7026048766 | 3.6507663579 | 10.0106228746 |
| C20 | -0.5382839146 | 3.7551953879 | 9.2365318980  |
| C21 | -0.3646163161 | 3.8098326672 | 6.8221318952  |
| H22 | -2.1666135461 | 4.6208271812 | 5.9574649500  |
| H23 | -2.1553412054 | 3.0625210046 | 3.9962270239  |
| H24 | -0.3286395018 | 1.3502249373 | 3.7965430407  |
| H25 | 1.4799063290  | 1.2540669052 | 5.4865884868  |
| H26 | 0.9385290612  | 0.7846253172 | 10.0740077580 |
| H27 | -1.1531054043 | 0.5757518773 | 11.4071340816 |
| H28 | -2.8184152325 | 2.4492345195 | 11.4323615164 |
| H29 | -2.4747610264 | 4.4258866986 | 9.9316159512  |
| C30 | 2.0877968023  | 7.6041165724 | 7.6739095144  |
| C31 | 3.2758896887  | 6.8663547940 | 7.5532590365  |
| C32 | 3.2674384719  | 5.4733640269 | 7.7273135186  |
| C33 | 2.0559965921  | 4.8337081479 | 8.0213922138  |
| C34 | 0.8471778500  | 5.5557573226 | 8.0550848418  |
| C35 | 0.8674289617  | 6.9492048697 | 7.9078196003  |
| H36 | 2.1044308796  | 8.6933191022 | 7.5521931357  |
| H37 | 4.2171669214  | 7.3765598563 | 7.3202566923  |
| H38 | 4.1824610931  | 4.8839192023 | 7.6220705441  |
| H39 | -0.0706015974 | 7.5169589070 | 7.9426066762  |
| C40 | -0.4235491929 | 4.7238792942 | 8.0636423225  |
| H41 | -1.3146518538 | 5.3724143472 | 8.0136097195  |
| P42 | 1.8998411451  | 3.0153184376 | 8.1958340694  |

|     |              |               |              |
|-----|--------------|---------------|--------------|
| N43 | 3.3660000262 | 2.3454000037  | 8.7809999842 |
| S44 | 4.2280987750 | 1.8025464029  | 7.3637256129 |
| O45 | 5.3394023053 | 2.7536195745  | 7.1010196865 |
| O46 | 3.2869696783 | 1.6206861206  | 6.2109323399 |
| C47 | 5.8152200585 | -2.6175357512 | 7.6805543873 |
| C48 | 6.6967660335 | -1.5516157038 | 7.4591335740 |
| C49 | 6.2912231137 | -0.2027175610 | 7.4118477181 |
| C50 | 4.8985895587 | 0.0756264917  | 7.5930072621 |
| C51 | 3.9661698686 | -0.9872095329 | 7.7757434117 |
| C52 | 4.4614851363 | -2.3034470370 | 7.8308696836 |
| H53 | 7.7602274437 | -1.7694619580 | 7.3136402243 |
| C54 | 7.4018222779 | 0.8184082766  | 7.1066512365 |
| C55 | 2.4381327428 | -0.8562515604 | 7.8329749064 |
| H56 | 3.7484397336 | -3.1234963222 | 7.9761518034 |
| C57 | 6.2945291268 | -4.0657021809 | 7.7414509328 |
| H58 | 5.3996760413 | -4.6951292156 | 7.9205905975 |
| C59 | 6.9222160176 | -4.5181855141 | 6.4041394911 |
| H60 | 7.8329833239 | -3.9362600452 | 6.1723066790 |
| H61 | 7.2088821206 | -5.5849043015 | 6.4498191302 |
| H62 | 6.2165633116 | -4.3861553371 | 5.5653742395 |
| C63 | 1.8277683616 | -1.3596684790 | 6.5036060625 |
| C64 | 1.8089175243 | -1.6114285189 | 9.0249149682 |
| H65 | 2.1745667861 | 0.2050191744  | 7.9441626135 |
| H66 | 7.0726985123 | 1.8067066688  | 7.4440594748 |
| C67 | 8.7357370884 | 0.5102297388  | 7.8229614628 |
| C68 | 7.6113004221 | 0.9173097228  | 5.5771803645 |
| H69 | 0.7224013859 | -1.4109328121 | 9.0610841051 |
| H70 | 1.9284508488 | -2.7059746277 | 8.9360997486 |
| H71 | 2.2531648539 | -1.3039152738 | 9.9856360429 |
| H72 | 0.7378408545 | -1.1762916837 | 6.4825418673 |



|     |              |               |              |
|-----|--------------|---------------|--------------|
| H73 | 2.2881922318 | -0.8491766132 | 5.6420213314 |
| H74 | 1.9924985276 | -2.4464214462 | 6.3829397175 |
| H75 | 7.5593318332 | -5.3601584625 | 8.9817133146 |
| C76 | 7.2692892522 | -4.2952610171 | 8.9181160943 |
| H77 | 8.1939241267 | -3.7026398817 | 8.7926093546 |
| H78 | 6.8117772258 | -4.0044381135 | 9.8799591952 |
| H79 | 8.4011981648 | 1.6559888856  | 5.3472300814 |
| H80 | 7.9191546916 | -0.0563643375 | 5.1513666124 |
| H81 | 6.6861214594 | 1.2406360962  | 5.0714419234 |
| H82 | 9.4145188593 | 1.3750554397  | 7.7109385013 |
| H83 | 8.5900147433 | 0.3314951761  | 8.9031634484 |
| H84 | 9.2640374731 | -0.3647379255 | 7.4010070347 |

### 12-He8-ring complex at 2.2 Å

E(BP86/6-31G\*) = -2285.134475939

|     |              |              |               |
|-----|--------------|--------------|---------------|
| He1 | 2.0197999236 | 1.8632999806 | 11.4446998610 |
| He2 | 6.2280001122 | 3.2546000316 | 9.1307002230  |
| He3 | 4.8860000000 | 0.1785000000 | 10.2418000000 |
| He4 | 3.3617997895 | 4.9394997485 | 10.3335993678 |
| He5 | 3.1955000441 | 0.3896000137 | 11.1134000956 |
| He6 | 5.0725999564 | 4.7343997820 | 9.5020999641  |
| He7 | 6.1504000000 | 1.3674000000 | 9.4372000000  |
| He8 | 2.0974001519 | 3.7505000287 | 11.1382006820 |
| X9  | 4.1239000000 | 2.5590000000 | 10.2877000000 |
| C10 | 4.2825276112 | 0.2994127521 | 3.1634562817  |
| C11 | 3.1285180939 | 0.6872707760 | 2.4632492653  |
| C12 | 2.1048188745 | 1.3624613841 | 3.1366506528  |

|     |              |               |              |
|-----|--------------|---------------|--------------|
| C13 | 2.2160681666 | 1.6444439714  | 4.5106819532 |
| C14 | 3.3635569844 | 1.2577491036  | 5.2147574602 |
| C15 | 5.4258258546 | 2.3207871514  | 6.6066195472 |
| C16 | 5.7189639599 | 3.6618362654  | 6.8719363434 |
| C17 | 6.9238138741 | 4.2073734040  | 6.4005003780 |
| C18 | 7.8171110291 | 3.4093431226  | 5.6679510194 |
| C19 | 7.4865919126 | 2.0795092497  | 5.3500683551 |
| C20 | 6.2737785387 | 1.5357201207  | 5.7962329424 |
| C21 | 4.4155244745 | 0.5846118533  | 4.5279096481 |
| H22 | 5.0936081588 | -0.2261358078 | 2.6448255421 |
| H23 | 3.0365647936 | 0.4603766976  | 1.3949801729 |
| H24 | 1.1999605744 | 1.6705380547  | 2.6012576703 |
| H25 | 1.4011267466 | 2.1363122919  | 5.0409312139 |
| H26 | 4.9956287713 | 4.2490854737  | 7.4447642405 |
| H27 | 7.1663594533 | 5.2564021813  | 6.6057146187 |
| H28 | 8.7628240156 | 3.8326412234  | 5.3111439223 |
| H29 | 8.1579510808 | 1.4767877865  | 4.7256476100 |
| C30 | 5.1545812461 | -2.8728855682 | 7.5477893404 |
| C31 | 4.1551141707 | -2.3828435210 | 8.4022327755 |
| C32 | 3.7318795205 | -1.0467898531 | 8.3046539310 |
| C33 | 4.3224903579 | -0.2214393116 | 7.3382931674 |
| C34 | 5.2869616672 | -0.7199381196 | 6.4365888403 |
| C35 | 5.7169223151 | -2.0478710367 | 6.5572953959 |
| H36 | 5.4870211892 | -3.9133480928 | 7.6365864735 |
| H37 | 3.7004973666 | -3.0426831198 | 9.1498514665 |
| H38 | 2.9513434043 | -0.6461437226 | 8.9607368495 |
| H39 | 6.4706235434 | -2.4452854151 | 5.8657441664 |
| C40 | 5.6976556654 | 0.2100026425  | 5.2978583343 |
| H41 | 6.4100467478 | -0.2928543665 | 4.6231776263 |
| P42 | 3.8390784136 | 1.5167913069  | 7.0340487512 |

|     |               |              |               |
|-----|---------------|--------------|---------------|
| N43 | 3.1432000222  | 2.2826004150 | 8.3378998064  |
| S44 | 1.4494781986  | 2.1055271033 | 8.3583028773  |
| O45 | 1.1144036977  | 1.1023651975 | 9.4011837662  |
| O46 | 0.9137063611  | 1.8084263924 | 6.9895993153  |
| C47 | -0.4906524466 | 6.2947931913 | 9.2654926536  |
| C48 | -0.8373174576 | 5.1592619342 | 10.0115104654 |
| C49 | -0.2753793510 | 3.8859902346 | 9.7965335216  |
| C50 | 0.7201961231  | 3.7640561110 | 8.7731553018  |
| C51 | 1.0450100454  | 4.8821620342 | 7.9513929230  |
| C52 | 0.4378509739  | 6.1198070131 | 8.2366698531  |
| H53 | -1.5898645001 | 5.2584187550 | 10.7996955699 |
| C54 | -0.8528184371 | 2.7299724484 | 10.6290553239 |
| C55 | 1.9316327467  | 4.8621563010 | 6.7016491026  |
| H56 | 0.6911408035  | 6.9820044900 | 7.6085165355  |
| C57 | -1.1123799527 | 7.6624143378 | 9.5366529124  |
| H58 | -0.6804131802 | 8.3657823968 | 8.7968489916  |
| C59 | -2.6429098551 | 7.6486480869 | 9.3281861640  |
| H60 | -3.1380566981 | 6.9734208540 | 10.0480405139 |
| H61 | -3.0646824886 | 8.6595260110 | 9.4738960774  |
| H62 | -2.9066607814 | 7.3070361667 | 8.3118219244  |
| C63 | 1.0446003745  | 4.9484411392 | 5.4365215854  |
| C64 | 2.9885852179  | 5.9906572288 | 6.6985969932  |
| H65 | 2.4748408609  | 3.9086131620 | 6.6668959427  |
| H66 | -0.0659557610 | 1.9820595802 | 10.7744062998 |
| C67 | -1.3559241104 | 3.1451848598 | 12.0272557867 |
| C68 | -1.9853650193 | 2.0398109124 | 9.8308291990  |
| H69 | 3.6905872275  | 5.8496033411 | 5.8568304223  |
| H70 | 2.5304103842  | 6.9899617607 | 6.5743095671  |
| H71 | 3.5697163903  | 6.0050692751 | 7.6368414908  |
| H72 | 1.6615142329  | 4.8516392089 | 4.5262015661  |

|     |               |              |               |
|-----|---------------|--------------|---------------|
| H73 | 0.2851084561  | 4.1480402504 | 5.4330668117  |
| H74 | 0.5150343675  | 5.9176756366 | 5.3874405025  |
| H75 | -1.1570978455 | 9.2016350892 | 11.0997909295 |
| C76 | -0.7497221198 | 8.1868435959 | 10.9450144610 |
| H77 | -1.1654372982 | 7.5354823739 | 11.7341332231 |
| H78 | 0.3433180220  | 8.2289531209 | 11.0868522234 |
| H79 | -2.3917362749 | 1.1878333199 | 10.4061166143 |
| H80 | -2.8140017950 | 2.7458870862 | 9.6306105442  |
| H81 | -1.6184523360 | 1.6534695274 | 8.8655241628  |
| H82 | -1.5755180508 | 2.2362315751 | 12.6148331291 |
| H83 | -0.6003579185 | 3.7306326787 | 12.5808872751 |
| H84 | -2.2910863642 | 3.7346681079 | 11.9938819403 |

### 13

$$E(M06-2X/6-311+G^{**}) = -1359.425808708$$

$$H(M06-2X/6-31+G^*) = -1358.793312$$

$$E(BP86/6-31G^*) = -1382.719802199$$

|     |               |               |              |
|-----|---------------|---------------|--------------|
| C1  | -2.4978313466 | 1.2676319689  | 6.9534286188 |
| C2  | -2.8021593964 | 2.5617242134  | 6.5204695566 |
| C3  | -1.7957007386 | 3.5081165814  | 6.3439896418 |
| C4  | -0.4642043296 | 3.1693259235  | 6.5969856391 |
| C5  | -0.1672260550 | 1.8789076275  | 7.0182984750 |
| C6  | 1.4207084779  | -0.2785166441 | 6.4363672680 |
| C7  | 2.3963910299  | -0.7170482562 | 5.5495491648 |
| C8  | 2.2052712810  | -1.9275494001 | 4.8788397543 |
| C9  | 1.0544810130  | -2.6779728766 | 5.1077188188 |
| C10 | 0.0807454020  | -2.2357925786 | 6.0083252351 |

|     |               |               |               |
|-----|---------------|---------------|---------------|
| C11 | 0.2607731322  | -1.0312428976 | 6.6770611881  |
| C12 | -1.1758790421 | 0.9206329493  | 7.2039279872  |
| H13 | -3.2905323927 | 0.5370036338  | 7.0947866337  |
| H14 | -3.8356508614 | 2.8305731391  | 6.3229211824  |
| H15 | -2.0449621960 | 4.5108348410  | 6.0107512323  |
| H16 | 0.3330592462  | 3.8977519177  | 6.4689777131  |
| H17 | 3.2916266129  | -0.1216934436 | 5.3862240819  |
| H18 | 2.9560395921  | -2.2832349430 | 4.1799132526  |
| H19 | 0.9110823777  | -3.6186187492 | 4.5842194198  |
| H20 | -0.8115793342 | -2.8311258341 | 6.1859458046  |
| C21 | 0.3272755658  | -0.6810491475 | 11.3828516891 |
| C22 | 1.4489810191  | 0.1451561282  | 11.3806594466 |
| C23 | 1.8572083127  | 0.7667083794  | 10.1982312446 |
| C24 | 1.1259230213  | 0.5428038335  | 9.0400472834  |
| C25 | -0.0055020655 | -0.2868212769 | 9.0285291125  |
| C26 | -0.4025677762 | -0.8998468492 | 10.2105865299 |
| H27 | 0.0138022892  | -1.1623092079 | 12.3046322355 |
| H28 | 2.0063842536  | 0.3060445624  | 12.2982433182 |
| H29 | 2.7272772764  | 1.4164247359  | 10.1629694291 |
| H30 | -1.2762160357 | -1.5463267010 | 10.2227006501 |
| C31 | -0.7297144557 | -0.4580120393 | 7.6906439944  |
| H32 | -1.5908891307 | -1.1222166596 | 7.8049618392  |
| P33 | 1.5012663268  | 1.2559915503  | 7.4240243798  |
| N34 | 2.7679544740  | 2.1824966945  | 7.4461292105  |
| C35 | 4.5102119503  | 4.3429366527  | 4.2654276855  |
| C36 | 5.0340757007  | 4.3827671806  | 5.5593380386  |
| C37 | 4.4416360249  | 3.6623636763  | 6.5883345513  |
| C38 | 3.2991675421  | 2.8731135271  | 6.3595310423  |
| C39 | 2.7798617266  | 2.8409379685  | 5.0500167796  |
| C40 | 3.3797487001  | 3.5662159389  | 4.0225682293  |

|     |              |              |              |
|-----|--------------|--------------|--------------|
| H41 | 4.9754559422 | 4.9069897636 | 3.4631269478 |
| H42 | 5.9155196915 | 4.9830187609 | 5.7691870255 |
| H43 | 4.8457443383 | 3.6905865606 | 7.5959991479 |
| H44 | 1.8961414754 | 2.2414974452 | 4.8317866619 |
| H45 | 2.9551076513 | 3.5202450951 | 3.0231372016 |

### 13-H<sup>+</sup>

$$E(M06-2X/6-311+G^{**}) = -1359.826619839$$

$$H(M06-2X/6-31+G^*) = -1359.17756$$

|     |               |               |              |
|-----|---------------|---------------|--------------|
| C1  | -2.4207276919 | 1.3544040934  | 6.9006374961 |
| C2  | -2.6929435673 | 2.6696194862  | 6.5126556837 |
| C3  | -1.6746378681 | 3.6155447959  | 6.4123639807 |
| C4  | -0.3558989070 | 3.2580218770  | 6.6949093485 |
| C5  | -0.0976352138 | 1.9444596815  | 7.0702301041 |
| C6  | 1.5157589763  | -0.2483239076 | 6.4773994076 |
| C7  | 2.5360609658  | -0.6727305774 | 5.6337849787 |
| C8  | 2.3585129356  | -1.8661372345 | 4.9330898906 |
| C9  | 1.1855751329  | -2.6019316028 | 5.0900789233 |
| C10 | 0.1715036747  | -2.1688708210 | 5.9495436300 |
| C11 | 0.3305992169  | -0.9826024200 | 6.6535009302 |
| C12 | -1.1138289293 | 0.9804883130  | 7.1841624802 |
| H13 | -3.2266038156 | 0.6305505945  | 6.9830418068 |
| H14 | -3.7154080379 | 2.9579567749  | 6.2903291780 |
| H15 | -1.9052028582 | 4.6330809373  | 6.1150159560 |
| H16 | 0.4477871722  | 3.9860857305  | 6.6215794703 |

|     |               |               |               |
|-----|---------------|---------------|---------------|
| H17 | 3.4464142725  | -0.0896597505 | 5.5211501352  |
| H18 | 3.1373879476  | -2.2202413922 | 4.2660565820  |
| H19 | 1.0571311888  | -3.5288844133 | 4.5402735211  |
| H20 | -0.7333889930 | -2.7581060065 | 6.0686163116  |
| C21 | 0.1862725858  | -0.7819767280 | 11.3720013661 |
| C22 | 1.3164441450  | 0.0264667960  | 11.4599296831 |
| C23 | 1.7940086527  | 0.6852999197  | 10.3266491519 |
| C24 | 1.1188719545  | 0.5136431259  | 9.1239385005  |
| C25 | -0.0253578147 | -0.3000363154 | 9.0189790063  |
| C26 | -0.4855229803 | -0.9473733356 | 10.1578617904 |
| H27 | -0.1794376675 | -1.2914175602 | 12.2577457451 |
| H28 | 1.8285249545  | 0.1464374646  | 12.4086300075 |
| H29 | 2.6764489293  | 1.3148433201  | 10.4018574880 |
| H30 | -1.3660447016 | -1.5807848062 | 10.1033242220 |
| C31 | -0.6949475607 | -0.4200379878 | 7.6429708505  |
| H32 | -1.5650246462 | -1.0770291194 | 7.7052107833  |
| P33 | 1.4812602216  | 1.2164075305  | 7.5137765259  |
| C34 | 4.4021986349  | 4.2808861526  | 4.1984538867  |
| C35 | 4.9883669317  | 4.3778576064  | 5.4589803034  |
| C36 | 4.4532140269  | 3.6863778874  | 6.5407665375  |
| C37 | 3.3222665552  | 2.8910386408  | 6.3590071155  |
| C38 | 2.7261311227  | 2.7859492046  | 5.1021067082  |
| C39 | 3.2731099375  | 3.4847871262  | 4.0270424390  |
| H40 | 4.8226384831  | 4.8216389318  | 3.3575300395  |
| H41 | 5.8686097956  | 4.9949826479  | 5.6070684900  |
| H42 | 4.9146068869  | 3.7664557136  | 7.5220481387  |
| H43 | 1.8434702401  | 2.1704961089  | 4.9416586415  |
| H44 | 2.8069712373  | 3.4006366916  | 3.0506686822  |
| N45 | 2.8002211818  | 2.1951430455  | 7.4929709116  |
| H46 | 3.3047209941  | 2.3236982714  | 8.3640442218  |

### 13-Me<sup>+</sup>

$$E(\text{M06-2X/6-311+G**}) = -1399.122488853$$

$$H(\text{M06-2X/6-31+G*}) = -1398.435134$$

|     |               |               |               |
|-----|---------------|---------------|---------------|
| C1  | -2.5773619668 | 1.2310718542  | 7.1131046723  |
| C2  | -2.9828335662 | 2.5408445810  | 6.8392452756  |
| C3  | -2.0580837945 | 3.5811521574  | 6.7774442836  |
| C4  | -0.7028436744 | 3.3243711147  | 6.9893628614  |
| C5  | -0.3099190245 | 2.0186413021  | 7.2610536789  |
| C6  | 1.4882713263  | 0.0767883760  | 6.3757355922  |
| C7  | 2.4726855216  | -0.1954763989 | 5.4285057803  |
| C8  | 2.3358762915  | -1.3318887545 | 4.6302493484  |
| C9  | 1.2362582293  | -2.1707994669 | 4.7818038985  |
| C10 | 0.2569950325  | -1.8949507497 | 5.7385471759  |
| C11 | 0.3732039116  | -0.7713081947 | 6.5461604753  |
| C12 | -1.2320170714 | 0.9628362761  | 7.3282174875  |
| H13 | -3.3094282777 | 0.4294692712  | 7.1555896600  |
| H14 | -4.0347423286 | 2.7490262284  | 6.6717067625  |
| H15 | -2.3902759097 | 4.5916792687  | 6.5642314002  |
| H16 | 0.0261030587  | 4.1299949604  | 6.9431453619  |
| H17 | 3.3324092177  | 0.4541371504  | 5.3048651545  |
| H18 | 3.0943206263  | -1.5566883232 | 3.8878442339  |
| H19 | 1.1374435269  | -3.0505127448 | 4.1538681498  |
| H20 | -0.5952516116 | -2.5585040239 | 5.8548557333  |
| C21 | 0.4890458632  | -1.0894572866 | 11.2410899465 |
| C22 | 1.5603386938  | -0.2047933304 | 11.3421109636 |
| C23 | 1.8969658246  | 0.6112927040  | 10.2614055137 |



|     |               |               |               |
|-----|---------------|---------------|---------------|
| C24 | 1.1368667752  | 0.5218775735  | 9.1006535939  |
| C25 | 0.0637115815  | -0.3767102932 | 8.9798033826  |
| C26 | -0.2569878429 | -1.1843411089 | 10.0628051044 |
| H27 | 0.2332149924  | -1.7207231877 | 12.0860196030 |
| H28 | 2.1371147662  | -0.1514939634 | 12.2593541005 |
| H29 | 2.7421541001  | 1.2912024947  | 10.3253958270 |
| H30 | -1.0799207199 | -1.8896368177 | 9.9920019911  |
| C31 | -0.6558958480 | -0.4211386462 | 7.6287044316  |
| H32 | -1.4491534816 | -1.1716772417 | 7.6453897691  |
| P33 | 1.3626120428  | 1.4272905414  | 7.5639186803  |
| C34 | 4.9901853905  | 3.1829921148  | 4.2080076252  |
| C35 | 5.5572264373  | 2.7519314468  | 5.4079899931  |
| C36 | 4.7528522030  | 2.5426753052  | 6.5256896820  |
| C37 | 3.3818959398  | 2.7778526234  | 6.4341514529  |
| C38 | 2.8106760298  | 3.2269432630  | 5.2444899205  |
| C39 | 3.6189958259  | 3.4195536075  | 4.1253424213  |
| H40 | 5.6193566309  | 3.3363051527  | 3.3370745917  |
| H41 | 6.6249357660  | 2.5681394816  | 5.4710592639  |
| H42 | 5.1745462841  | 2.1839401553  | 7.4606257932  |
| H43 | 1.7392110500  | 3.4079808646  | 5.1901804714  |
| H44 | 3.1776486127  | 3.7560958911  | 3.1929077609  |
| N45 | 2.5618880674  | 2.5476624569  | 7.5976841102  |
| C46 | 2.5398945659  | 3.6161009698  | 8.6167271114  |
| H47 | 2.3195922521  | 4.5772378318  | 8.1430570372  |
| H48 | 1.7753761113  | 3.4064752486  | 9.3702065363  |
| H49 | 3.5151755060  | 3.6727221440  | 9.1071630142  |

13-F

$$E(M06-2X/6-311+G^{**}) = -1459.337765800$$

$$H(M06-2X/6-31+G^*) = -1458.672840$$

|     |               |               |               |
|-----|---------------|---------------|---------------|
| C1  | 0.0455062443  | -1.5880972756 | 6.3941772201  |
| C2  | 0.0550580587  | -1.5702815301 | 4.9987937871  |
| C3  | 0.3134663226  | -0.3800128196 | 4.3192590198  |
| C4  | 0.5743835633  | 0.7899969498  | 5.0333155770  |
| C5  | 0.5509962516  | 0.7764169878  | 6.4247619989  |
| C6  | 1.9024523510  | 1.4845241525  | 8.8058835714  |
| C7  | 3.0371395266  | 2.0594768493  | 9.3714763299  |
| C8  | 3.7521619197  | 1.3843799294  | 10.3617607235 |
| C9  | 3.3486495464  | 0.1139133709  | 10.7688625656 |
| C10 | 2.2206729484  | -0.4738526303 | 10.1951068786 |
| C11 | 1.4908100883  | 0.2097792789  | 9.2247603702  |
| C12 | 0.2830965825  | -0.4160747067 | 7.1097717166  |
| H13 | -0.1578807191 | -2.5139219889 | 6.9290910924  |
| H14 | -0.1390027319 | -2.4848802373 | 4.4439136519  |
| H15 | 0.3245986194  | -0.3660937853 | 3.2322292726  |
| H16 | 0.8113676759  | 1.7175039125  | 4.5183271747  |
| H17 | 3.3693441714  | 3.0342654528  | 9.0255837958  |
| H18 | 4.6319868679  | 1.8442819340  | 10.8046766734 |
| H19 | 3.9098841662  | -0.4201576780 | 11.5315111213 |
| H20 | 1.8994246203  | -1.4650061006 | 10.5105139754 |
| C21 | -2.9813852193 | 1.2717601247  | 9.9984888177  |
| C22 | -2.8090354024 | 2.5683567268  | 9.5192627487  |
| C23 | -1.6800916871 | 2.8996104410  | 8.7624307724  |
| C24 | -0.7066579781 | 1.9433075750  | 8.4775682474  |
| C25 | -0.8959387038 | 0.6438728031  | 8.9702655863  |
| C26 | -2.0161061776 | 0.3010474042  | 9.7209437957  |
| H27 | -3.8605307510 | 1.0139850152  | 10.5845895206 |

|     |               |               |               |
|-----|---------------|---------------|---------------|
| H28 | -3.5587275016 | 3.3274204657  | 9.7326857705  |
| H29 | -1.5332305620 | 3.9029209384  | 8.3739661076  |
| H30 | -2.1362752770 | -0.7172345934 | 10.0883815655 |
| C31 | 0.2070931661  | -0.3469981317 | 8.6275795812  |
| H32 | -0.0084415049 | -1.3373381822 | 9.0444299021  |
| N33 | 0.4623283784  | 3.7859940185  | 7.1198700818  |
| P34 | 0.8984272180  | 2.2748516324  | 7.4518978952  |
| F35 | 2.4277906015  | 2.3733990954  | 6.5658371378  |
| C36 | 2.3584788608  | 7.0970514294  | 5.2999990755  |
| C37 | 1.0166894451  | 6.7874789983  | 5.0687561691  |
| C38 | 0.4324487145  | 5.6716468159  | 5.6574943314  |
| C39 | 1.1570773586  | 4.8024491963  | 6.5089105324  |
| C40 | 2.5148614197  | 5.1371173047  | 6.7285842994  |
| C41 | 3.0935616999  | 6.2547131178  | 6.1374576664  |
| H42 | 2.8181705257  | 7.9692285369  | 4.8424423804  |
| H43 | 0.4162222573  | 7.4237683067  | 4.4206257787  |
| H44 | -0.6142091311 | 5.4360502888  | 5.4806646409  |
| H45 | 3.1134009625  | 4.4919224150  | 7.3618467793  |
| H46 | 4.1420886003  | 6.4715125864  | 6.3349108859  |

### 13-He<sub>8</sub>-ring complex at 1.7 Å

E(BP86/6-31G\*) = -1382.719802199

|     |              |              |               |
|-----|--------------|--------------|---------------|
| He1 | 2.0198000003 | 1.8632999998 | 11.4447000022 |
| He2 | 6.2280000189 | 3.2546000137 | 9.1307000205  |
| He3 | 4.8860000155 | 0.1784999892 | 10.2418000345 |
| He4 | 3.3618000000 | 4.9395000000 | 10.3336000000 |
| He5 | 3.1955000045 | 0.3896000202 | 11.1133999710 |

|     |              |               |               |
|-----|--------------|---------------|---------------|
| He6 | 5.0726000000 | 4.7344000000  | 9.5021000000  |
| He7 | 6.1503999662 | 1.3673999954  | 9.4371999653  |
| He8 | 2.0973999996 | 3.7504999999  | 11.1381999991 |
| X9  | 4.1239000000 | 2.5590000000  | 10.2877000000 |
| C10 | 1.5613422447 | 0.0073481338  | 4.0899878988  |
| C11 | 0.8670536389 | 1.1176232863  | 3.5811252195  |
| C12 | 0.8434324748 | 2.3139602842  | 4.3063020261  |
| C13 | 1.5087530639 | 2.4160792285  | 5.5420699192  |
| C14 | 2.2034251128 | 1.3098025141  | 6.0565742126  |
| C15 | 4.6806634836 | 0.4719818320  | 6.8627551357  |
| C16 | 5.9445315091 | 1.0751525458  | 6.8816807612  |
| C17 | 7.0038416865 | 0.4948341796  | 6.1641743869  |
| C18 | 6.7945823354 | -0.6771318264 | 5.4227742946  |
| C19 | 5.5136053207 | -1.2506974981 | 5.3558578151  |
| C20 | 4.4513989763 | -0.6677273217 | 6.0595345867  |
| C21 | 2.2279036169 | 0.0939893758  | 5.3178048240  |
| H22 | 1.5854405183 | -0.9345540856 | 3.5278848616  |
| H23 | 0.3473328546 | 1.0422776201  | 2.6190814440  |
| H24 | 0.3049527998 | 3.1852583165  | 3.9166941895  |
| H25 | 1.4762748648 | 3.3583308262  | 6.0897721582  |
| H26 | 6.0948482425 | 1.9983690288  | 7.4432661486  |
| H27 | 7.9939574717 | 0.9642754082  | 6.1824295427  |
| H28 | 7.6241666322 | -1.1332428644 | 4.8704244121  |
| H29 | 5.3357251083 | -2.1376666097 | 4.7351026209  |
| C30 | 0.9953124923 | -2.8135967297 | 8.7087218791  |
| C31 | 0.8847395407 | -1.7463828272 | 9.6123701637  |
| C32 | 1.5398528188 | -0.5299219793 | 9.3550271825  |
| C33 | 2.3178113668 | -0.3902836992 | 8.1983476461  |
| C34 | 2.3624284116 | -1.4355241896 | 7.2472465934  |
| C35 | 1.7181741220 | -2.6510031122 | 7.5144326386  |

|     |               |               |               |
|-----|---------------|---------------|---------------|
| H36 | 0.4920272773  | -3.7647185611 | 8.9158767946  |
| H37 | 0.2820287584  | -1.8559339030 | 10.5211098945 |
| H38 | 1.4364814666  | 0.3114901419  | 10.0416881610 |
| H39 | 1.7587544507  | -3.4623801919 | 6.7770657632  |
| C40 | 2.9990311443  | -1.1063874490 | 5.8998512973  |
| H41 | 2.9271058060  | -1.9691159365 | 5.2162423338  |
| P42 | 3.1655267422  | 1.1718468778  | 7.6700063169  |
| N43 | 3.3659999949  | 2.3453999819  | 8.7810000074  |
| C44 | 1.4858077817  | 5.9414891774  | 7.3815818965  |
| C45 | 0.7784906085  | 5.0316850060  | 8.1855062641  |
| C46 | 1.3938587529  | 3.8562898754  | 8.6387811364  |
| C47 | 2.7367798230  | 3.5541684921  | 8.3073757754  |
| C48 | 3.4337537095  | 4.4821806527  | 7.4968452109  |
| C49 | 2.8184057908  | 5.6566648049  | 7.0403914518  |
| H50 | 1.0039325742  | 6.8583738325  | 7.0234344087  |
| H51 | -0.2664606227 | 5.2318945673  | 8.4527100252  |
| H52 | 0.8337086710  | 3.1397993191  | 9.2489742818  |
| H53 | 4.4696559779  | 4.2593426700  | 7.2184705695  |
| H54 | 3.3829595537  | 6.3502132714  | 6.4051094702  |

### 13-He<sub>8</sub>-ring complex at 2.2 Å

E(BP86/6-31G\*) = -1382.74013556

|     |              |              |               |
|-----|--------------|--------------|---------------|
| He1 | 2.0198000000 | 1.8633000000 | 11.4447000000 |
| He2 | 6.2280000007 | 3.2546000002 | 9.1307000013  |
| He3 | 4.8860000006 | 0.1785000002 | 10.2418000012 |
| He4 | 3.3618000000 | 4.9395000000 | 10.3336000000 |
| He5 | 3.1955000000 | 0.3896000000 | 11.1134000000 |

|     |               |               |               |
|-----|---------------|---------------|---------------|
| He6 | 5.0726000000  | 4.7344000000  | 9.5021000000  |
| He7 | 6.1503999990  | 1.3673999998  | 9.4371999981  |
| He8 | 2.0974000000  | 3.7505000000  | 11.1382000000 |
| X9  | 4.1239000000  | 2.5590000000  | 10.2877000000 |
| C10 | -0.2860143289 | 0.1971526056  | 4.6092299347  |
| C11 | 0.0578823596  | 1.0808013374  | 3.5711373653  |
| C12 | 1.0067705395  | 2.0881750240  | 3.7887453289  |
| C13 | 1.6196748941  | 2.2282895682  | 5.0470996157  |
| C14 | 1.2723788844  | 1.3508306965  | 6.0849812752  |
| C15 | 2.3726826041  | -0.4651867060 | 7.8248836117  |
| C16 | 3.6487821553  | -0.9878606610 | 8.0586457907  |
| C17 | 3.8476706155  | -2.3769440472 | 7.9826323570  |
| C18 | 2.7779672895  | -3.2243778217 | 7.6579215066  |
| C19 | 1.5079802492  | -2.6911639090 | 7.3752212958  |
| C20 | 1.3018208160  | -1.3075992220 | 7.4471487188  |
| C21 | 0.3156699229  | 0.3244591015  | 5.8668830044  |
| H22 | -1.0244871383 | -0.5958192363 | 4.4372477178  |
| H23 | -0.4181344978 | 0.9762409437  | 2.5893953680  |
| H24 | 1.2767796657  | 2.7745430081  | 2.9783732021  |
| H25 | 2.3602741817  | 3.0144531198  | 5.2135999015  |
| H26 | 4.4722598118  | -0.3056342499 | 8.2794077235  |
| H27 | 4.8425147758  | -2.7963102914 | 8.1705405467  |
| H28 | 2.9350576779  | -4.3076847207 | 7.6018958050  |
| H29 | 0.6834154840  | -3.3529587162 | 7.0826547305  |
| C30 | -2.2404334238 | 0.9669808088  | 9.7585240497  |
| C31 | -1.4022071020 | 2.0009881671  | 10.2011135157 |
| C32 | -0.1160650431 | 2.1465933409  | 9.6524539842  |
| C33 | 0.3218591787  | 1.2534621932  | 8.6672510254  |
| C34 | -0.5326378587 | 0.2301101322  | 8.1961294860  |
| C35 | -1.8105453934 | 0.0848283407  | 8.7513124673  |

|     |               |               |               |
|-----|---------------|---------------|---------------|
| H36 | -3.2414274900 | 0.8505360910  | 10.1894979171 |
| H37 | -1.7479125639 | 2.6970035734  | 10.9735416357 |
| H38 | 0.5442721646  | 2.9498025659  | 9.9866795829  |
| H39 | -2.4770911631 | -0.7085699412 | 8.3907491885  |
| C40 | -0.0057398545 | -0.6210314710 | 7.0392057385  |
| H41 | -0.7566773867 | -1.3691447107 | 6.7323290639  |
| P42 | 1.9660312897  | 1.3239843400  | 7.8119670414  |
| N43 | 3.1431999997  | 2.2825999998  | 8.3378999993  |
| C44 | 3.8191700825  | 5.8783810994  | 6.1348488209  |
| C45 | 2.6356041888  | 5.7233717785  | 6.8740921821  |
| C46 | 2.4047348483  | 4.5525067519  | 7.6104830158  |
| C47 | 3.3458565069  | 3.4932011090  | 7.6162908337  |
| C48 | 4.5375472503  | 3.6678900947  | 6.8713871718  |
| C49 | 4.7689597292  | 4.8424125994  | 6.1428676187  |
| H50 | 3.9999486439  | 6.7939454064  | 5.5603785232  |
| H51 | 1.8824738395  | 6.5209434971  | 6.8793205353  |
| H52 | 1.4774701871  | 4.4385963370  | 8.1851614406  |
| H53 | 5.2675868059  | 2.8518968019  | 6.8639158055  |
| H54 | 5.6972831898  | 4.9454148818  | 5.5674487932  |

## 14

$$E(M06-2X/6-311+G^{**}) = -1595.25369039637$$

$$H(M06-2X/6-31+G^*) = -1594.380635$$

$$E(BP86/6-31G^*) = -1595.46443103189$$

|    |               |              |              |
|----|---------------|--------------|--------------|
| C1 | -2.6139000045 | 0.2922897904 | 7.1843119443 |
| C2 | -3.3305455994 | 1.3502755445 | 6.6172090842 |
| C3 | -2.6823026720 | 2.5227328237 | 6.2358198784 |
| C4 | -1.3016946564 | 2.6464593454 | 6.4108382020 |

|     |               |               |               |
|-----|---------------|---------------|---------------|
| C5  | -0.5922252011 | 1.5881327908  | 6.9626891070  |
| C6  | 1.5843918841  | -0.0569330084 | 6.5609442894  |
| C7  | 2.6169195900  | -0.3340169159 | 5.6688013904  |
| C8  | 2.7814486961  | -1.6429574630 | 5.2082359524  |
| C9  | 1.9242342904  | -2.6508243127 | 5.6409056996  |
| C10 | 0.8935888706  | -2.3689798499 | 6.5415616285  |
| C11 | 0.7201626929  | -1.0710629481 | 7.0060655874  |
| C12 | -1.2406941288 | 0.4100338559  | 7.3625298735  |
| H13 | -3.1277146003 | -0.6164058554 | 7.4887240787  |
| H14 | -4.4037968675 | 1.2566510428  | 6.4794771622  |
| H15 | -3.2497183788 | 3.3420228617  | 5.8048478111  |
| H16 | -0.7778520957 | 3.5559459838  | 6.1295826432  |
| H17 | 3.2862692990  | 0.4559924594  | 5.3375404161  |
| H18 | 3.5827072424  | -1.8716889306 | 4.5123230245  |
| H19 | 2.0573697530  | -3.6663894494 | 5.2798000152  |
| H20 | 0.2307841037  | -3.1616414422 | 6.8803459023  |
| C21 | 0.7798968653  | 0.0699211397  | 11.5910097963 |
| C22 | 1.5720112321  | 1.1955117255  | 11.3794730940 |
| C23 | 1.7393805331  | 1.7009505801  | 10.0877347640 |
| C24 | 1.1073517282  | 1.0664521377  | 9.0268689639  |
| C25 | 0.3005401494  | -0.0638853865 | 9.2334137307  |
| C26 | 0.1411087556  | -0.5624793628 | 10.5204344891 |
| H27 | 0.6531949532  | -0.3207366578 | 12.5964441595 |
| H28 | 2.0596756743  | 1.6814598459  | 12.2190624429 |
| H29 | 2.3512712440  | 2.5795201473  | 9.9022107220  |
| H30 | -0.4793251371 | -1.4385748796 | 10.6930833016 |
| C31 | -0.3672628782 | -0.6689288004 | 7.9991616153  |
| H32 | -0.9705819674 | -1.5378392096 | 8.2773284484  |
| P33 | 1.2079229538  | 1.5801996852  | 7.2791466867  |
| N34 | 2.0375549085  | 2.8525085311  | 6.9409081439  |



|     |               |              |              |
|-----|---------------|--------------|--------------|
| C35 | 5.2404128548  | 3.5225192465 | 4.2809115632 |
| C36 | 5.4356512902  | 3.5573183201 | 5.6577246339 |
| C37 | 4.3820947031  | 3.3272499288 | 6.5429897752 |
| C38 | 3.0900254285  | 3.0526770456 | 6.0320699620 |
| C39 | 2.8817268262  | 3.0441652512 | 4.6301157536 |
| C40 | 3.9671490771  | 3.2700260830 | 3.7808151507 |
| H41 | 6.0707591382  | 3.6982672517 | 3.6034100134 |
| H42 | 6.4276230498  | 3.7648517561 | 6.0495863267 |
| H43 | 3.8148163135  | 3.2542861961 | 2.7052391009 |
| C44 | 4.6061917139  | 3.3084818835 | 8.0427601900 |
| H45 | 3.6761754792  | 3.6696271798 | 8.4957558367 |
| C46 | 1.4875651475  | 2.8604753392 | 4.0572391658 |
| H47 | 0.9188683176  | 2.2101088069 | 4.7310223793 |
| C48 | 4.8446445545  | 1.8678122791 | 8.5183963853 |
| H49 | 4.9236130623  | 1.8169134615 | 9.6114539832 |
| H50 | 4.0326645131  | 1.2009851152 | 8.2078920134 |
| H51 | 5.7770811544  | 1.4806070726 | 8.0900452673 |
| C52 | 5.7438651378  | 4.2153060175 | 8.5153367681 |
| H53 | 5.7515186743  | 4.2626547799 | 9.6098485179 |
| H54 | 6.7242470582  | 3.8385499877 | 8.2021197149 |
| H55 | 5.6306920983  | 5.2339183753 | 8.1299590666 |
| C56 | 0.7749417648  | 4.2193433218 | 4.0143975034 |
| H57 | -0.2708459171 | 4.1075105737 | 3.7023490113 |
| H58 | 0.8034879219  | 4.7031501050 | 4.9962057194 |
| H59 | 1.2775720537  | 4.8819396971 | 3.2999243583 |
| C60 | 1.4560593152  | 2.1888774062 | 2.6830928775 |
| H61 | 0.4207333705  | 1.9668043273 | 2.4033012260 |
| H62 | 1.8729155900  | 2.8334393066 | 1.9015044245 |
| H63 | 2.0176409374  | 1.2483176916 | 2.6871483904 |

## 14-H<sup>+</sup>

$$E(\text{M06-2X/6-311+G}^{**}) = -1595.65930718011$$

$$H(\text{M06-2X/6-31+G}^*) = -1594.770122$$

|     |               |               |               |
|-----|---------------|---------------|---------------|
| C1  | -2.0714831435 | 1.9366203158  | 7.8953043020  |
| C2  | -2.2289682890 | 3.2372188363  | 7.4122829420  |
| C3  | -1.1684805854 | 3.8995121677  | 6.8022173744  |
| C4  | 0.0713151580  | 3.2740771824  | 6.6631497541  |
| C5  | 0.2209593507  | 1.9750179394  | 7.1476699042  |
| C6  | 0.9837058132  | -0.6149875969 | 6.4149541927  |
| C7  | 1.4907167866  | -1.3478649317 | 5.3476717365  |
| C8  | 0.8194789331  | -2.5076348897 | 4.9571190342  |
| C9  | -0.3329954588 | -2.9071347662 | 5.6301387036  |
| C10 | -0.8329499710 | -2.1651903536 | 6.7043201455  |
| C11 | -0.1719818906 | -1.0125201283 | 7.1075856305  |
| C12 | -0.8474692792 | 1.2931239002  | 7.7686215946  |
| H13 | -2.9039235222 | 1.4258629200  | 8.3710833737  |
| H14 | -3.1886002101 | 3.7335220456  | 7.5155780079  |
| H15 | -1.2990547652 | 4.9101327510  | 6.4300043935  |
| H16 | 0.8917350508  | 3.7989513134  | 6.1867154000  |
| H17 | 2.3891977689  | -1.0267038622 | 4.8261730408  |
| H18 | 1.1969426723  | -3.0968628779 | 4.1280644695  |
| H19 | -0.8504687417 | -3.8090275676 | 5.3191071916  |
| H20 | -1.7310493483 | -2.4897703020 | 7.2224163368  |
| C21 | 1.5207288786  | -0.4954944297 | 11.4633443045 |
| C22 | 2.7441870869  | -0.0063020381 | 11.0115062146 |

|     |               |               |               |
|-----|---------------|---------------|---------------|
| C23 | 2.8744436354  | 0.4479824810  | 9.6982316929  |
| C24 | 1.7624906209  | 0.3957466962  | 8.8652610499  |
| C25 | 0.5262284631  | -0.1048964162 | 9.3055333439  |
| C26 | 0.4098130559  | -0.5473313661 | 10.6164411966 |
| H27 | 1.4272929144  | -0.8444521743 | 12.4867982141 |
| H28 | 3.5980520528  | 0.0231180074  | 11.6802072541 |
| H29 | 3.8245002841  | 0.8344671443  | 9.3373416802  |
| H30 | -0.5377553209 | -0.9341024196 | 10.9800858066 |
| C31 | -0.6093623275 | -0.1311827816 | 8.2797510623  |
| H32 | -1.5231754530 | -0.5231114491 | 8.7316161379  |
| P33 | 1.6607344789  | 0.8910002581  | 7.1361156352  |
| C34 | 3.4494867028  | 5.3063492053  | 4.7530013965  |
| C35 | 3.7212265785  | 5.1193074585  | 6.1040795244  |
| C36 | 3.5935590407  | 3.8591056568  | 6.6936764119  |
| C37 | 3.1875843907  | 2.7953631654  | 5.8682735053  |
| C38 | 2.8912965851  | 2.9597657645  | 4.5034494172  |
| C39 | 3.0354758826  | 4.2397291978  | 3.9623595511  |
| H40 | 3.5526804005  | 6.2940659441  | 4.3143910253  |
| H41 | 4.0265490678  | 5.9673642794  | 6.7071711350  |
| H42 | 2.8122449494  | 4.4095304153  | 2.9146816359  |
| N43 | 3.0338446421  | 1.4781692115  | 6.4603372869  |
| H44 | 3.8336645777  | 0.8505100219  | 6.4246266750  |
| C45 | 3.8912581540  | 3.6438314107  | 8.1684831649  |
| H46 | 3.1426830400  | 2.9416416463  | 8.5575378376  |
| C47 | 2.4405485102  | 1.7879019917  | 3.6473780791  |
| H48 | 1.7690556214  | 1.1706937756  | 4.2580687130  |
| C49 | 3.6465300559  | 0.9277792672  | 3.2422929323  |
| H50 | 3.3231361665  | 0.0562417929  | 2.6626692897  |
| H51 | 4.3329592590  | 1.5105515248  | 2.6190538419  |
| H52 | 4.2150128318  | 0.5718340040  | 4.1087286717  |

|     |              |              |               |
|-----|--------------|--------------|---------------|
| C53 | 1.6489592677 | 2.2022630586 | 2.4059934090  |
| H54 | 1.2334540955 | 1.3130815792 | 1.9230650227  |
| H55 | 0.8190007557 | 2.8694456114 | 2.6589459240  |
| H56 | 2.2833529777 | 2.7041274717 | 1.6682610120  |
| C57 | 5.2798950810 | 3.0124285998 | 8.3461877380  |
| H58 | 5.4839563661 | 2.8186980435 | 9.4049762352  |
| H59 | 5.3817627832 | 2.0685391453 | 7.7990256873  |
| H60 | 6.0535293895 | 3.6922309905 | 7.9739321266  |
| C61 | 3.7797215503 | 4.9162702140 | 9.0101246361  |
| H62 | 3.8593676263 | 4.6615325834 | 10.0709189968 |
| H63 | 4.5850858964 | 5.6233900532 | 8.7860903089  |
| H64 | 2.8217621643 | 5.4222278722 | 8.8540278722  |

#### 14-Me<sup>+</sup>

$$E(\text{M06-2X/6-311+G**}) = -1634.95829708235$$

$$H(\text{M06-2X/6-31+G*}) = -1634.030722$$

|     |               |               |              |
|-----|---------------|---------------|--------------|
| C1  | -2.6231387721 | 0.7401905653  | 7.4772738917 |
| C2  | -3.2572088652 | 1.9726100977  | 7.2974208694 |
| C3  | -2.5166981692 | 3.1454913227  | 7.1730473822 |
| C4  | -1.1228734557 | 3.1016129816  | 7.2216659821 |
| C5  | -0.4989657296 | 1.8712314521  | 7.3972894186 |
| C6  | 1.4563305112  | 0.2210441457  | 6.2684223273 |
| C7  | 2.3363554179  | 0.1064681755  | 5.1913864558 |
| C8  | 2.2659451759  | -1.0276966722 | 4.3828957310 |
| C9  | 1.3342094634  | -2.0269811141 | 4.6457496961 |
| C10 | 0.4549070256  | -1.9074651555 | 5.7223349014 |
| C11 | 0.5064472158  | -0.7859730555 | 6.5408999295 |

|     |               |               |               |
|-----|---------------|---------------|---------------|
| C12 | -1.2367509988 | 0.6836917827  | 7.5322765404  |
| H13 | -3.2107158103 | -0.1683759655 | 7.5754012769  |
| H14 | -4.3409524894 | 2.0148166812  | 7.2572664912  |
| H15 | -3.0218552880 | 4.0962060255  | 7.0385547215  |
| H16 | -0.5428307768 | 4.0151842599  | 7.1276224651  |
| H17 | 3.0679981753  | 0.8745074813  | 4.9708377386  |
| H18 | 2.9471130890  | -1.1235457393 | 3.5438976253  |
| H19 | 1.2882639295  | -2.9057115364 | 4.0104808448  |
| H20 | -0.2724317100 | -2.6888012262 | 5.9239348454  |
| C21 | 1.0892430690  | -1.0791809381 | 11.2276241585 |
| C22 | 1.9894451055  | -0.0172637573 | 11.2625606554 |
| C23 | 2.1112481364  | 0.8327663262  | 10.1627663253 |
| C24 | 1.3216384259  | 0.5967708082  | 9.0416819296  |
| C25 | 0.3987521885  | -0.4618788409 | 9.0040746707  |
| C26 | 0.2906305546  | -1.3039570299 | 10.1031399976 |
| H27 | 1.0016124183  | -1.7379317882 | 12.0856657250 |
| H28 | 2.5973327618  | 0.1529657744  | 12.1449372276 |
| H29 | 2.8075342609  | 1.6654075276  | 10.1942009625 |
| H30 | -0.4136388637 | -2.1310912838 | 10.0889876654 |
| C31 | -0.4366467092 | -0.6035917884 | 7.7317682873  |
| H32 | -1.1078077863 | -1.4615293218 | 7.8104341384  |
| P33 | 1.2721805419  | 1.5361431959  | 7.4986170900  |
| C34 | 5.1623356842  | 2.9174300553  | 4.3331394515  |
| C35 | 5.4774768870  | 2.3615352013  | 5.5685217218  |
| C36 | 4.5505891566  | 2.3621297282  | 6.6141396857  |
| C37 | 3.2850442445  | 2.9229267646  | 6.3651211780  |
| C38 | 2.9628811987  | 3.5437365322  | 5.1441103851  |
| C39 | 3.9237318240  | 3.5180528109  | 4.1304011695  |
| H40 | 5.8921329882  | 2.8989819146  | 3.5295118354  |
| H41 | 6.4573785322  | 1.9184942885  | 5.7219472472  |

|     |               |               |              |
|-----|---------------|---------------|--------------|
| H42 | 3.7005168159  | 3.9714733160  | 3.1690971065 |
| N43 | 2.2656809377  | 2.8358935321  | 7.3914093589 |
| C44 | 2.1830927962  | 3.9274445968  | 8.3745753060 |
| H45 | 1.9878222711  | 4.8735890781  | 7.8594868167 |
| H46 | 1.3756512099  | 3.7400621993  | 9.0895866553 |
| H47 | 3.1293611043  | 4.0107122270  | 8.9195623929 |
| C48 | 4.9219330686  | 1.7536695684  | 7.9553564842 |
| H49 | 4.1409090817  | 2.0279099773  | 8.6691673431 |
| C50 | 1.6152395424  | 4.2008813876  | 4.8981526203 |
| H51 | 1.1313670697  | 4.3332955115  | 5.8700099184 |
| C52 | 0.7070148372  | 3.3059945716  | 4.0441036303 |
| H53 | -0.2666076074 | 3.7839579999  | 3.8920715725 |
| H54 | 1.1563074980  | 3.1295004507  | 3.0601619556 |
| H55 | 0.5345113511  | 2.3294448142  | 4.5111970578 |
| C56 | 1.7602810221  | 5.5918284679  | 4.2698291563 |
| H57 | 0.7848543748  | 6.0864181986  | 4.2273678835 |
| H58 | 2.4417522329  | 6.2232782157  | 4.8484140550 |
| H59 | 2.1401518276  | 5.5351125429  | 3.2449562277 |
| C60 | 4.9715305211  | 0.2218411449  | 7.8855164042 |
| H61 | 5.2298876969  | -0.1958211015 | 8.8643896156 |
| H62 | 4.0107124970  | -0.2063416299 | 7.5776192962 |
| H63 | 5.7294573644  | -0.1077167251 | 7.1658587121 |
| C64 | 6.2429204331  | 2.3220382073  | 8.4869818360 |
| H65 | 6.4295482391  | 1.9545450194  | 9.5009918778 |
| H66 | 7.0906800859  | 2.0149598001  | 7.8669161311 |
| H67 | 6.2241169088  | 3.4158779605  | 8.5144141418 |

14-F

$$E(M06-2X/6-311+G^{**}) = -1695.16832747081$$

$$H(M06-2X/6-31+G^*) = -1694.264138$$

|     |               |               |               |
|-----|---------------|---------------|---------------|
| C1  | -0.4268628489 | -1.1776824684 | 6.0300828785  |
| C2  | -0.4091181105 | -0.9523182419 | 4.6530037488  |
| C3  | 0.0492418643  | 0.2660006752  | 4.1515486257  |
| C4  | 0.4947801632  | 1.2578467158  | 5.0257200472  |
| C5  | 0.4487884307  | 1.0465963407  | 6.4021741624  |
| C6  | 1.9313105151  | 1.1694123443  | 8.7966572170  |
| C7  | 3.1573609255  | 1.4459109010  | 9.3979894474  |
| C8  | 3.7667753197  | 0.5110179902  | 10.2367049108 |
| C9  | 3.1652128646  | -0.7255986454 | 10.4579054898 |
| C10 | 1.9450335616  | -1.0179930282 | 9.8486702005  |
| C11 | 1.3226816843  | -0.0760868912 | 9.0320999494  |
| C12 | -0.0061196576 | -0.1782304655 | 6.9058903035  |
| H13 | -0.7755342348 | -2.1302265635 | 6.4250989844  |
| H14 | -0.7472741468 | -1.7298862998 | 3.9725896151  |
| H15 | 0.0744543605  | 0.4384928797  | 3.0785025263  |
| H16 | 0.8984255321  | 2.1942355151  | 4.6464922876  |
| H17 | 3.6512237318  | 2.3922618625  | 9.2019263612  |
| H18 | 4.7195317113  | 0.7453928943  | 10.7047733662 |
| H19 | 3.6418914355  | -1.4611851867 | 11.1009205245 |
| H20 | 1.4665464722  | -1.9813214895 | 10.0162383731 |
| C21 | -2.9175433508 | 1.5105701330  | 10.1520149509 |
| C22 | -2.5410264985 | 2.8261876572  | 9.8914069159  |
| C23 | -1.3827602476 | 3.0979049549  | 9.1556235925  |
| C24 | -0.5811289295 | 2.0632366123  | 8.6758648292  |
| C25 | -0.9713245420 | 0.7461802164  | 8.9571549180  |
| C26 | -2.1250870277 | 0.4615251173  | 9.6806187581  |

|     |               |               |               |
|-----|---------------|---------------|---------------|
| H27 | -3.8214743106 | 1.2987592523  | 10.7183202811 |
| H28 | -3.1537363032 | 3.6469859582  | 10.2578218135 |
| H29 | -1.0800382007 | 4.1174065076  | 8.9370666081  |
| H30 | -2.4050654420 | -0.5726215605 | 9.8764858834  |
| C31 | -0.0457379678 | -0.3312902989 | 8.4174296499  |
| H32 | -0.4029414461 | -1.3306811665 | 8.6905230633  |
| N33 | 0.8009159683  | 3.9000944429  | 7.5284715315  |
| P34 | 1.0212588026  | 2.3124089095  | 7.6251623595  |
| F35 | 2.5401157854  | 2.3554813941  | 6.7124490473  |
| C36 | 2.3217212323  | 6.7559479435  | 4.8244095601  |
| C37 | 1.0951529907  | 6.1363966066  | 4.6027860769  |
| C38 | 0.6020278261  | 5.1692221157  | 5.4797942796  |
| C39 | 1.3612414835  | 4.7886360467  | 6.6226391845  |
| C40 | 2.6042514671  | 5.4409229986  | 6.8510605201  |
| C41 | 3.0601737925  | 6.4050574771  | 5.9524987948  |
| H42 | 2.6968603419  | 7.5040678183  | 4.1303264102  |
| H43 | 0.5086531223  | 6.4172998253  | 3.7301542102  |
| H44 | 4.0173697208  | 6.8907121021  | 6.1279361892  |
| C45 | -0.7882538166 | 4.5868628135  | 5.2895593183  |
| H46 | -0.7940827277 | 3.5892950335  | 5.7385734401  |
| C47 | 3.3913151031  | 5.0832379703  | 8.0949283776  |
| H48 | 3.3266251086  | 3.9962722872  | 8.1750726228  |
| C49 | -1.8059447790 | 5.4272094081  | 6.0730916408  |
| H50 | -2.8067979834 | 4.9787666139  | 6.0289065732  |
| H51 | -1.5027863401 | 5.4968597187  | 7.1216422320  |
| H52 | -1.8597232559 | 6.4428705917  | 5.6592727594  |
| C53 | -1.2178267623 | 4.4487435673  | 3.8280250345  |
| H54 | -2.1592696968 | 3.8902974440  | 3.7658107557  |
| H55 | -1.3841381393 | 5.4252556489  | 3.3565079920  |
| H56 | -0.4648493812 | 3.9137052595  | 3.2381484135  |



|     |              |              |               |
|-----|--------------|--------------|---------------|
| C57 | 4.8729489390 | 5.4530180545 | 8.0362655102  |
| H58 | 5.3932613005 | 5.0438236365 | 8.9110294570  |
| H59 | 5.3508294196 | 5.0515708651 | 7.1359124041  |
| H60 | 5.0228075089 | 6.5404403549 | 8.0492170987  |
| C61 | 2.7380127726 | 5.6896479698 | 9.3434347703  |
| H62 | 3.2537741609 | 5.3575005760 | 10.2544435835 |
| H63 | 2.7862238223 | 6.7858066022 | 9.3014726147  |
| H64 | 1.6901243916 | 5.3832345165 | 9.4058816394  |

### 14-He<sub>8</sub>-ring complex at 1.7 Å

E(BP86/6-31G\*) = -1618.5641793224

|     |               |               |                |
|-----|---------------|---------------|----------------|
| He1 | 2.0198000010# | 1.8633000004# | 11.4447000030# |
| He2 | 6.2280000000# | 3.2546000000# | 9.1307000000#  |
| He3 | 4.8860000000# | 0.1785000000# | 10.2418000000# |
| He4 | 3.3617999650# | 4.9394999934# | 10.3335999352# |
| He5 | 3.1954999991# | 0.3895999997# | 11.1133999981# |
| He6 | 5.0726000241# | 4.7344000068# | 9.5021000479#  |
| He7 | 6.1504000000# | 1.3674000000# | 9.4372000000#  |
| He8 | 2.0974000279# | 3.7505000031# | 11.1382000384# |
| X9  | 4.1239000000# | 2.5590000000# | 10.2877000000# |
| C10 | 1.8287327294  | -0.0116105775 | 3.9743961854   |
| C11 | 1.0691843411  | 1.0606366744  | 3.4826316987   |
| C12 | 0.9520499087  | 2.2298123136  | 4.2423761576   |
| C13 | 1.5882354753  | 2.3394072108  | 5.4914467957   |
| C14 | 2.3535298259  | 1.2701727830  | 5.9929919022   |
| C15 | 4.8817119813  | 0.5491746926  | 6.8371655208   |
| C16 | 6.1454301330  | 1.1496673459  | 6.9286308624   |
| C17 | 7.2425597638  | 0.6083768304  | 6.2395847120   |

|     |               |               |               |
|-----|---------------|---------------|---------------|
| C18 | 7.0847897168  | -0.5334228036 | 5.4437168137  |
| C19 | 5.8147694182  | -1.1150556284 | 5.3075653558  |
| C20 | 4.7166603424  | -0.5704761698 | 5.9874435412  |
| C21 | 2.4673240355  | 0.0845525406  | 5.2173545587  |
| H22 | 1.9276466938  | -0.9343385652 | 3.3894613169  |
| H23 | 0.5719525026  | 0.9783649041  | 2.5094906675  |
| H24 | 0.3613499502  | 3.0744995325  | 3.8707138880  |
| H25 | 1.4806379076  | 3.2620842124  | 6.0612063978  |
| H26 | 6.2817496745  | 2.0472056664  | 7.5263624768  |
| H27 | 8.2234771331  | 1.0890289264  | 6.3256705473  |
| H28 | 7.9422845934  | -0.9598901699 | 4.9108582498  |
| H29 | 5.6696810879  | -1.9853305309 | 4.6553190745  |
| C30 | 1.4702916394  | -3.0629709154 | 8.5048165283  |
| C31 | 1.3021672125  | -2.0617008506 | 9.4699632517  |
| C32 | 1.8425664495  | -0.7814971712 | 9.2640095184  |
| C33 | 2.5651108140  | -0.4963100350 | 8.0969257732  |
| C34 | 2.6789131819  | -1.4930859341 | 7.0988302461  |
| C35 | 2.1469643090  | -2.7719412444 | 7.3104416848  |
| H36 | 1.0545687847  | -4.0637477741 | 8.6678956314  |
| H37 | 0.7426979311  | -2.2698045093 | 10.3888977141 |
| H38 | 1.6812115280  | -0.0044470349 | 10.0077667416 |
| H39 | 2.2458546941  | -3.5354071050 | 6.5288664442  |
| C40 | 3.2985215109  | -1.0780195249 | 5.7730750550  |
| H41 | 3.2936003313  | -1.9227640184 | 5.0629312948  |
| P42 | 3.2965252981  | 1.1639500363  | 7.6328621640  |
| N43 | 3.3659999829# | 2.3453999966# | 8.7809999774# |
| C44 | 1.0881350043  | 5.8064140910  | 7.4481518375  |
| C45 | 0.4808830668  | 4.7880435271  | 8.1854481876  |
| C46 | 1.1873261499  | 3.6430997354  | 8.6038664691  |
| C47 | 2.5873606795  | 3.5041739369  | 8.2910887027  |

|     |               |              |               |
|-----|---------------|--------------|---------------|
| C48 | 3.1927001276  | 4.5394619038 | 7.4901730870  |
| C49 | 2.4328734446  | 5.6608466293 | 7.1008455676  |
| H50 | 0.5195515632  | 6.6896048753 | 7.1350432695  |
| H51 | -0.5844273344 | 4.8677895563 | 8.4330791497  |
| H52 | 2.9137144218  | 6.4343379428 | 6.4903966033  |
| C53 | 0.3626132106  | 2.5524727147 | 9.2956454613  |
| H54 | 1.0789279865  | 1.8405936853 | 9.7234981006  |
| C55 | 4.6228843631  | 4.4704597146 | 6.9411284481  |
| H56 | 5.1463516218  | 3.6978492115 | 7.5174812580  |
| C57 | -0.5441212450 | 3.0779514882 | 10.4341582781 |
| H58 | -0.9814300007 | 2.2280176619 | 10.9902941972 |
| H59 | -0.0029605195 | 3.7146320086 | 11.1507521665 |
| H60 | -1.3912145925 | 3.6672543898 | 10.0373744064 |
| C61 | -0.5215946654 | 1.7786824402 | 8.2869041979  |
| H62 | -1.1038711215 | 0.9950332633 | 8.8072337615  |
| H63 | -1.2388368025 | 2.4604450619 | 7.7930556034  |
| H64 | 0.0708362561  | 1.2896271791 | 7.4969317181  |
| C65 | 5.4039541001  | 5.8014291524 | 7.0746220673  |
| H66 | 6.4804465140  | 5.6283109247 | 6.8903998947  |
| H67 | 5.0691679892  | 6.5410630527 | 6.3241139958  |
| H68 | 5.2949001495  | 6.2642076551 | 8.0678095259  |
| C69 | 4.6558491785  | 4.0465404227 | 5.4515880740  |
| H70 | 5.6986668542  | 4.0230579420 | 5.0831351121  |
| H71 | 4.2178161408  | 3.0501982170 | 5.2834464435  |
| H72 | 4.0940727364  | 4.7678076819 | 4.8292143702  |

#### 14-Hes-ring complex at 2.2 Å

E(BP86/6-31G\*) = -1618.5938307245

|     |               |               |                |
|-----|---------------|---------------|----------------|
| He1 | 2.0197996364# | 1.8632999911# | 11.4446998530# |
| He2 | 6.2280001646# | 3.2545998536# | 9.1307001817#  |
| He3 | 4.8860000000# | 0.1785000000# | 10.2418000000# |
| He4 | 3.3617997507# | 4.9394998884# | 10.3336001313# |
| He5 | 3.1955000751# | 0.3896000234# | 11.1134001628# |
| He6 | 5.0725998862# | 4.7344000042# | 9.5020998031#  |
| He7 | 6.1503999231# | 1.3674001818# | 9.4371998713#  |
| He8 | 2.0974005926# | 3.7504999244# | 11.1381998484# |
| X9  | 4.1239000000# | 2.5590000000# | 10.2877000000# |
| C10 | 0.9555648903  | -0.2806852298 | 3.9900839196   |
| C11 | 0.6009727237  | 0.8816397490  | 3.2862232569   |
| C12 | 0.8829752702  | 2.1413230693  | 3.8296628667   |
| C13 | 1.5195019575  | 2.2530443648  | 5.0781952636   |
| C14 | 1.8759988986  | 1.0922647183  | 5.7871798819   |
| C15 | 4.0250321183  | -0.2325062551 | 6.9284907548   |
| C16 | 5.4068802252  | -0.0990420679 | 7.1086937660   |
| C17 | 6.2766484907  | -1.1030629199 | 6.6494113751   |
| C18 | 5.7655347333  | -2.2375138732 | 6.0048986343   |
| C19 | 4.3812894970  | -2.3676954078 | 5.8039498028   |
| C20 | 3.5106415731  | -1.3694059641 | 6.2594369577   |
| C21 | 1.5909008038  | -0.1832096070 | 5.2346511718   |
| H22 | 0.7376003920  | -1.2702934599 | 3.5694888302   |
| H23 | 0.1042855176  | 0.7988994828  | 2.3126782321   |
| H24 | 0.6089272440  | 3.0514411394  | 3.2845645768   |
| H25 | 1.7325130618  | 3.2410230571  | 5.4902735826   |
| H26 | 5.8067148032  | 0.7889447892  | 7.5965060046   |
| H27 | 7.3571314516  | -0.9925425717 | 6.7953920506   |
| H28 | 6.4438058787  | -3.0210298077 | 5.6481756413   |
| H29 | 3.9776541835  | -3.2460004706 | 5.2849943707   |

|     |               |               |               |
|-----|---------------|---------------|---------------|
| C30 | -0.2229465075 | -2.2223639237 | 9.0827561409  |
| C31 | 0.0169026002  | -1.0915586034 | 9.8755236225  |
| C32 | 0.9042803258  | -0.0949246164 | 9.4345600209  |
| C33 | 1.5540108386  | -0.2350913406 | 8.2027784334  |
| C34 | 1.2998256396  | -1.3681231046 | 7.3942050277  |
| C35 | 0.4148152847  | -2.3586446101 | 7.8382068517  |
| H36 | -0.9144711234 | -2.9995385566 | 9.4277949827  |
| H37 | -0.4886611724 | -0.9794023264 | 10.8413316672 |
| H38 | 1.0866650187  | 0.7907731106  | 10.0425183486 |
| H39 | 0.2180381571  | -3.2351725763 | 7.2084365716  |
| C40 | 2.0001695058  | -1.4221871013 | 6.0381413606  |
| H41 | 1.7205368713  | -2.3398152155 | 5.4935823489  |
| P42 | 2.7249431131  | 0.9949916294  | 7.4522011449  |
| N43 | 3.1431999712# | 2.2826001332# | 8.3379001484# |
| C44 | 2.3292396865  | 6.1146398282  | 6.5609577702  |
| C45 | 1.3919161920  | 5.5015154417  | 7.3981510800  |
| C46 | 1.6369063699  | 4.2504474431  | 7.9951989006  |
| C47 | 2.8765133270  | 3.5733934768  | 7.7373527897  |
| C48 | 3.8433055128  | 4.2152823655  | 6.8930687429  |
| C49 | 3.5444326929  | 5.4666574968  | 6.3214383611  |
| H50 | 2.1152615258  | 7.0869307607  | 6.1016226305  |
| H51 | 0.4348486980  | 6.0018870455  | 7.5887131341  |
| H52 | 4.2836654183  | 5.9385476134  | 5.6627117081  |
| C53 | 0.5312090869  | 3.6345014811  | 8.8555882932  |
| H54 | 1.0057496798  | 2.8435334471  | 9.4580348713  |
| C55 | 5.1758129577  | 3.5597307596  | 6.5277661585  |
| H56 | 5.3262635202  | 2.7392116320  | 7.2466996803  |
| C57 | -0.5706384190 | 2.9745716074  | 7.9926947825  |
| H58 | -1.3550095919 | 2.5306152666  | 8.6344072196  |
| H59 | -1.0526571323 | 3.7251497290  | 7.3386116326  |

|     |               |              |               |
|-----|---------------|--------------|---------------|
| H60 | -0.1733131606 | 2.1755222034 | 7.3451704793  |
| C61 | -0.1248079631 | 4.6527325492 | 9.8169366670  |
| H62 | -0.7570802087 | 4.1270503117 | 10.5563718847 |
| H63 | 0.6235150615  | 5.2481637686 | 10.3647753056 |
| H64 | -0.7829023889 | 5.3573868432 | 9.2756607403  |
| C65 | 6.3795678008  | 4.5233568115 | 6.6355950350  |
| H66 | 7.3263890066  | 3.9653771669 | 6.5115238965  |
| H67 | 6.3559350817  | 5.2945111672 | 5.8436809397  |
| H68 | 6.4110055776  | 5.0421408430 | 7.6070270475  |
| C69 | 5.1421400838  | 2.9484804349 | 5.1066499302  |
| H70 | 6.1054283828  | 2.4593371533 | 4.8684764599  |
| H71 | 4.3447062222  | 2.1950817216 | 4.9947336798  |
| H72 | 4.9656951142  | 3.7353941259 | 4.3494978142  |

### **Cmpd B**

$E(\text{M06-2X/6-311+G}^{**}) = -1569.61962981991$

$H(\text{M06-2X/6-31+G}^*) = -1568.74416$

|     |              |              |              |
|-----|--------------|--------------|--------------|
| C1  | 7.9857037479 | 7.8896442566 | 2.3160890820 |
| C2  | 6.8953144760 | 8.7733649570 | 2.5177181593 |
| C3  | 5.6611830086 | 8.4730174097 | 1.9418225479 |
| H4  | 4.8226605943 | 9.1484316552 | 2.0821679292 |
| C5  | 5.4849748954 | 7.3207686294 | 1.1821797353 |
| H6  | 4.5180975432 | 7.0991886253 | 0.7399300742 |
| C7  | 6.5558936940 | 6.4552166384 | 0.9922553792 |
| H8  | 6.4086326114 | 5.5592200533 | 0.3975452501 |
| C9  | 7.8126821348 | 6.7137636130 | 1.5466178442 |
| C10 | 8.9589614624 | 5.7303542060 | 1.3727283163 |
| H11 | 9.8560741057 | 6.2979162352 | 1.1039513981 |

|     |               |               |               |
|-----|---------------|---------------|---------------|
| C12 | 9.2502419735  | 4.9968723193  | 2.6893212913  |
| H13 | 9.4204570832  | 5.7001877491  | 3.5090083135  |
| H14 | 10.1380444830 | 4.3621352801  | 2.5871623626  |
| H15 | 8.3989597175  | 4.3593213698  | 2.9554799826  |
| C16 | 8.7580497710  | 4.7238969963  | 0.2396746776  |
| H17 | 7.9528702291  | 4.0148032881  | 0.4640684651  |
| H18 | 9.6766660830  | 4.1445446116  | 0.1009673957  |
| H19 | 8.5265289837  | 5.2215948748  | -0.7081670829 |
| C20 | 7.0906381292  | 10.0175776943 | 3.3682344754  |
| H21 | 8.0559763378  | 10.4552956745 | 3.0770955683  |
| C22 | 6.0246014089  | 11.0932287765 | 3.1566674550  |
| H23 | 5.9119367704  | 11.3534180204 | 2.0983977187  |
| H24 | 6.3008465799  | 12.0011768846 | 3.7032813407  |
| H25 | 5.0470925681  | 10.7727859360 | 3.5345578990  |
| C26 | 7.1841391247  | 9.6483695167  | 4.8559958619  |
| H27 | 6.2298077126  | 9.2299382701  | 5.1966446134  |
| H28 | 7.4006705791  | 10.5365336004 | 5.4628748480  |
| H29 | 7.9691775390  | 8.9067145577  | 5.0245748493  |
| C30 | 9.4974654489  | 9.7743338535  | 0.1709430819  |
| H31 | 9.9227146002  | 10.5605722597 | -0.4612857175 |
| H32 | 8.9366869604  | 10.2435112723 | 0.9816778987  |
| H33 | 8.8032545103  | 9.1614143189  | -0.4169835720 |
| C34 | 11.3676305727 | 8.1713477576  | -0.0952299456 |
| C35 | 11.4114300452 | 8.1974830045  | -1.4832124343 |
| H36 | 10.8012266658 | 8.8980040772  | -2.0442286209 |
| C37 | 12.2677476923 | 7.3080489474  | -2.1419910930 |
| H38 | 12.3168364083 | 7.3242548340  | -3.2262263184 |
| C39 | 13.0448548086 | 6.4039650507  | -1.4265029074 |
| H40 | 13.6976257492 | 5.7137977722  | -1.9507789244 |
| C41 | 12.9785553969 | 6.3594985918  | -0.0280982969 |

|     |               |               |              |
|-----|---------------|---------------|--------------|
| H42 | 13.5535366798 | 5.6263008747  | 0.5251758781 |
| C43 | 12.1482684343 | 7.2502822354  | 0.6304758158 |
| C44 | 12.9727243734 | 7.5687263647  | 2.9580124539 |
| C45 | 14.1307088020 | 6.8265180453  | 3.1154889137 |
| H46 | 14.3221694385 | 5.9582959034  | 2.4964033348 |
| C47 | 15.0458491902 | 7.2045493518  | 4.1056357250 |
| H48 | 15.9583588726 | 6.6315289528  | 4.2334837743 |
| C49 | 14.7849363475 | 8.2912064285  | 4.9321183557 |
| H50 | 15.4953130729 | 8.5668302891  | 5.7051968379 |
| C51 | 13.6105677901 | 9.0372839696  | 4.7856295641 |
| H52 | 13.4087004390 | 9.8850911049  | 5.4322493262 |
| C53 | 12.7160842855 | 8.6763497211  | 3.7869602729 |
| C54 | 10.9077083906 | 10.2216249113 | 4.4508290032 |
| H55 | 10.8207841973 | 9.7562259442  | 5.4396914014 |
| H56 | 9.9089702789  | 10.4983026874 | 4.1141604525 |
| H57 | 11.5260868290 | 11.1218642924 | 4.5236263784 |
| N58 | 9.1967988862  | 8.2148732223  | 2.9500195990 |
| N59 | 10.5616617082 | 8.9594074238  | 0.7322654950 |
| N60 | 11.9235795922 | 7.3681964325  | 2.0257473856 |
| N61 | 11.4928194570 | 9.2932976763  | 3.4997843329 |
| P62 | 10.6050597215 | 8.4476306720  | 2.3473955839 |

### **Cmpd B-H<sup>+</sup>**

E(M06-2X/6-311+G\*\*) = -1570.02159388208

H(M06-2X/6-31+G\*) = -1569.129547

|    |              |              |              |
|----|--------------|--------------|--------------|
| C1 | 8.0345123681 | 7.8272207068 | 2.4017393843 |
| C2 | 6.9819481249 | 8.7632530218 | 2.4704296702 |



|     |               |               |               |
|-----|---------------|---------------|---------------|
| C3  | 5.8229847795  | 8.4913932837  | 1.7449989889  |
| H4  | 4.9933703276  | 9.1894212167  | 1.7723471730  |
| C5  | 5.7193965718  | 7.3373835391  | 0.9729772553  |
| H6  | 4.8123635163  | 7.1447388763  | 0.4084623554  |
| C7  | 6.7673273954  | 6.4286619139  | 0.9304102584  |
| H8  | 6.6644109919  | 5.5244991885  | 0.3385106059  |
| C9  | 7.9484262174  | 6.6444600064  | 1.6507465175  |
| C10 | 9.0157928996  | 5.5620874005  | 1.6587019085  |
| H11 | 9.9483823856  | 5.9736212795  | 2.0531903332  |
| C12 | 8.5887631657  | 4.4368117360  | 2.6143731832  |
| H13 | 8.4169566898  | 4.8152032042  | 3.6274319301  |
| H14 | 9.3607465377  | 3.6624035710  | 2.6615465867  |
| H15 | 7.6597892268  | 3.9708625241  | 2.2684657688  |
| C16 | 9.3200743866  | 5.0047584871  | 0.2634468354  |
| H17 | 8.4794407778  | 4.4271382253  | -0.1339871714 |
| H18 | 10.1807442421 | 4.3305742508  | 0.3159591594  |
| H19 | 9.5563543763  | 5.8005257015  | -0.4508583748 |
| C20 | 7.0914491933  | 10.0090011891 | 3.3349475810  |
| H21 | 8.1361761898  | 10.3460462565 | 3.2974126936  |
| C22 | 6.2256528293  | 11.1734751514 | 2.8486307375  |
| H23 | 6.3857936730  | 11.3835803040 | 1.7857707523  |
| H24 | 6.4677866240  | 12.0770624123 | 3.4159750229  |
| H25 | 5.1598813387  | 10.9753400588 | 2.9990685159  |
| C26 | 6.7644200869  | 9.6796215577  | 4.7998850266  |
| H27 | 5.7266520710  | 9.3414283701  | 4.8869341725  |
| H28 | 6.8882626923  | 10.5647059096 | 5.4324685356  |
| H29 | 7.3994348487  | 8.8821495207  | 5.2034188756  |
| C30 | 9.3699234128  | 9.8506167722  | 0.4371268435  |
| H31 | 9.8241931421  | 10.5573500912 | -0.2625799894 |
| H32 | 8.9563442972  | 10.4120002777 | 1.2763677549  |

|     |               |               |               |
|-----|---------------|---------------|---------------|
| H33 | 8.5609465329  | 9.2981246276  | -0.0517561362 |
| C34 | 11.1313581776 | 8.1266194326  | 0.0146118546  |
| C35 | 11.0032020313 | 8.1194866963  | -1.3657091492 |
| H36 | 10.3233028240 | 8.7963603486  | -1.8721780348 |
| C37 | 11.7721085042 | 7.2029781975  | -2.0894408157 |
| H38 | 11.6891840498 | 7.1806907853  | -3.1708294349 |
| C39 | 12.6265240194 | 6.3146400166  | -1.4424437402 |
| H40 | 13.2034142425 | 5.6016563875  | -2.0212943050 |
| C41 | 12.7419622748 | 6.3172865936  | -0.0487111133 |
| H42 | 13.3813519664 | 5.6006239310  | 0.4530316493  |
| C43 | 12.0012684387 | 7.2416667322  | 0.6675764851  |
| C44 | 13.0833846175 | 7.6581011740  | 2.9173115679  |
| C45 | 14.2955855068 | 6.9893448507  | 2.9164285503  |
| H46 | 14.4828455530 | 6.1649193890  | 2.2396316672  |
| C47 | 15.2794866662 | 7.4041059562  | 3.8186792842  |
| H48 | 16.2369861419 | 6.8948647905  | 3.8281321911  |
| C49 | 15.0426638360 | 8.4502083560  | 4.7052525656  |
| H50 | 15.8160289428 | 8.7524309002  | 5.4030927024  |
| C51 | 13.8165455841 | 9.1210846828  | 4.7127057118  |
| H52 | 13.6351224848 | 9.9377068271  | 5.4037279482  |
| C53 | 12.8489568800 | 8.7145158728  | 3.8076971079  |
| C54 | 11.0685513343 | 10.3036246505 | 4.5664919193  |
| H55 | 11.1239826649 | 9.9680482336  | 5.6064996301  |
| H56 | 10.0319238719 | 10.5490832699 | 4.3287578474  |
| H57 | 11.6813235728 | 11.2003555758 | 4.4397542605  |
| N58 | 10.3942679038 | 8.9300621061  | 0.9197888071  |
| N59 | 11.9518420707 | 7.4257102163  | 2.0813223815  |
| N60 | 11.5392801659 | 9.2454642195  | 3.6785889874  |
| P61 | 10.7019662774 | 8.4807774812  | 2.4780426864  |
| N62 | 9.2475384354  | 8.1397351505  | 3.1348673086  |

|     |              |              |              |
|-----|--------------|--------------|--------------|
| H63 | 9.2095183586 | 8.0716441419 | 4.1499184375 |
|-----|--------------|--------------|--------------|

**Cmpd B-Me<sup>+</sup>**

E(M06-2X/6-311+G\*\*) = -1609.3179033042

H(M06-2X/6-31+G\*) = -1608.387123

|     |               |               |               |
|-----|---------------|---------------|---------------|
| C1  | 8.0717294547  | 7.8342562794  | 2.4559758318  |
| C2  | 7.0173402891  | 8.7677486711  | 2.5209513112  |
| C3  | 5.8640924212  | 8.5054445473  | 1.7785195183  |
| H4  | 5.0353679378  | 9.2063193966  | 1.8132231905  |
| C5  | 5.7617751072  | 7.3630408613  | 0.9937210667  |
| H6  | 4.8612510415  | 7.1803562522  | 0.4157721337  |
| C7  | 6.8044301524  | 6.4460696128  | 0.9636475686  |
| H8  | 6.7029709382  | 5.5444803512  | 0.3675396195  |
| C9  | 7.9746576218  | 6.6485264474  | 1.7022196220  |
| C10 | 9.0226751360  | 5.5463725314  | 1.7258037906  |
| H11 | 9.9545032608  | 5.9402530543  | 2.1408578192  |
| C12 | 8.5586050556  | 4.4183137431  | 2.6616206156  |
| H13 | 8.3712739894  | 4.7842698015  | 3.6761250053  |
| H14 | 9.3177822086  | 3.6317168397  | 2.7158375503  |
| H15 | 7.6299911604  | 3.9703018403  | 2.2920338380  |
| C16 | 9.3399574853  | 4.9842581621  | 0.3346966731  |
| H17 | 8.5004807648  | 4.4077257728  | -0.0669005619 |
| H18 | 10.1972958544 | 4.3067650208  | 0.3981291136  |
| H19 | 9.5847060116  | 5.7749229685  | -0.3815624421 |
| C20 | 7.0645828271  | 10.0060291298 | 3.4014534919  |
| H21 | 8.1097008367  | 10.1788240207 | 3.6868234411  |
| C22 | 6.5604655221  | 11.2711298857 | 2.6945281371  |

|     |               |               |               |
|-----|---------------|---------------|---------------|
| H23 | 7.0418750358  | 11.4279123792 | 1.7241534624  |
| H24 | 6.7523467821  | 12.1494295536 | 3.3186848069  |
| H25 | 5.4807090020  | 11.2285245377 | 2.5231251391  |
| C26 | 6.2505181481  | 9.7730668246  | 4.6850289492  |
| H27 | 5.1896892180  | 9.6544640338  | 4.4398959712  |
| H28 | 6.3460869893  | 10.6275158407 | 5.3629596048  |
| H29 | 6.5660814986  | 8.8696978237  | 5.2155421414  |
| C30 | 9.3598309490  | 9.8942724328  | 0.5027946402  |
| H31 | 9.8176070327  | 10.5781663870 | -0.2173761094 |
| H32 | 9.0105899866  | 10.4746624887 | 1.3583268290  |
| H33 | 8.5046113356  | 9.3807987390  | 0.0510122586  |
| C34 | 11.0611424702 | 8.1149460572  | 0.0349087809  |
| C35 | 10.8968352836 | 8.1013712755  | -1.3412576304 |
| H36 | 10.2028237770 | 8.7757442161  | -1.8318197095 |
| C37 | 11.6494948687 | 7.1839362874  | -2.0813233629 |
| H38 | 11.5387635799 | 7.1573358611  | -3.1601107571 |
| C39 | 12.5238272607 | 6.3013857446  | -1.4535371343 |
| H40 | 13.0890603409 | 5.5889280189  | -2.0443868800 |
| C41 | 12.6745680031 | 6.3098119948  | -0.0629651798 |
| H42 | 13.3309486077 | 5.5992350843  | 0.4256207422  |
| C43 | 11.9490963621 | 7.2332613755  | 0.6691138268  |
| C44 | 13.1027792946 | 7.6859476478  | 2.8722251641  |
| C45 | 14.3134558498 | 7.0147849057  | 2.8569104988  |
| H46 | 14.4778798869 | 6.1678453866  | 2.2020833161  |
| C47 | 15.3253837968 | 7.4558748352  | 3.7150363922  |
| H48 | 16.2822717161 | 6.9454251416  | 3.7113950589  |
| C49 | 15.1166823619 | 8.5290328192  | 4.5759425413  |
| H50 | 15.9110790908 | 8.8509191195  | 5.2406933748  |
| C51 | 13.8918643539 | 9.2024735548  | 4.5996291941  |
| H52 | 13.7318515318 | 10.0406523665 | 5.2699679777  |

|     |               |               |              |
|-----|---------------|---------------|--------------|
| C53 | 12.8979098326 | 8.7715294969  | 3.7350460654 |
| C54 | 11.1420195840 | 10.3874094635 | 4.4898814567 |
| H55 | 11.2055721760 | 10.0844371569 | 5.5398756120 |
| H56 | 10.1059597814 | 10.6391576609 | 4.2566022911 |
| H57 | 11.7619570134 | 11.2734573495 | 4.3269613296 |
| N58 | 10.3581938006 | 8.9334677669  | 0.9527757053 |
| N59 | 11.9424237759 | 7.4227328211  | 2.0844332706 |
| N60 | 11.5878197661 | 9.3020865010  | 3.6268767675 |
| P61 | 10.6982864956 | 8.4834767246  | 2.5027799475 |
| N62 | 9.2801560970  | 8.1085210579  | 3.2222716190 |
| C63 | 9.2415309011  | 7.8083041450  | 4.6688461701 |
| H64 | 8.5538475082  | 6.9755499196  | 4.8227902643 |
| H65 | 10.2307418936 | 7.5163028709  | 5.0299657709 |
| H66 | 8.8894038974  | 8.6733106560  | 5.2394383985 |

### **Cmpd B-F<sup>-</sup>**

E(M06-2X/6-311+G\*\*) = -1669.57031242086

H(M06-2X/6-31+G\*) = -1668.662981

|    |              |              |               |
|----|--------------|--------------|---------------|
| C1 | 8.5089829750 | 8.0025701643 | 2.0226132057  |
| C2 | 7.3449697591 | 8.8205189219 | 1.9933981507  |
| C3 | 6.2599168593 | 8.4606803529 | 1.1954534622  |
| H4 | 5.3807318286 | 9.0999912060 | 1.1600459295  |
| C5 | 6.2881409159 | 7.3019889032 | 0.4213187322  |
| H6 | 5.4432088888 | 7.0410207736 | -0.2109474793 |
| C7 | 7.4096714136 | 6.4775604641 | 0.4763307438  |
| H8 | 7.4238347029 | 5.5646920814 | -0.1144151069 |
| C9 | 8.5127335646 | 6.7949998878 | 1.2716060437  |

|     |               |               |               |
|-----|---------------|---------------|---------------|
| C10 | 9.6709342255  | 5.8245564390  | 1.4230340419  |
| H11 | 10.5879536911 | 6.4034170482  | 1.5386343262  |
| C12 | 9.4941256574  | 5.0263699578  | 2.7227742172  |
| H13 | 9.4161209937  | 5.7098776432  | 3.5738041182  |
| H14 | 10.3493802510 | 4.3593313079  | 2.8886645299  |
| H15 | 8.5823380436  | 4.4166891473  | 2.6750277923  |
| C16 | 9.8818131590  | 4.8931722619  | 0.2298154987  |
| H17 | 9.0692977618  | 4.1612301277  | 0.1312068788  |
| H18 | 10.8158511310 | 4.3347679642  | 0.3602120390  |
| H19 | 9.9604557797  | 5.4585079031  | -0.7054550203 |
| C20 | 7.3266953713  | 10.0693313363 | 2.8565295655  |
| H21 | 8.3329437410  | 10.5047693268 | 2.8086516763  |
| C22 | 6.3283166795  | 11.1337015950 | 2.4008588686  |
| H23 | 6.4642721878  | 11.3875243325 | 1.3430950727  |
| H24 | 6.4603007147  | 12.0476735288 | 2.9916791531  |
| H25 | 5.2915117912  | 10.8026902405 | 2.5391856785  |
| C26 | 7.0714686776  | 9.6883117397  | 4.3221068310  |
| H27 | 6.0638741749  | 9.2667068946  | 4.4320852905  |
| H28 | 7.1493628040  | 10.5669612458 | 4.9763687669  |
| H29 | 7.8012117062  | 8.9407696088  | 4.6466683842  |
| C30 | 9.7161883326  | 9.7945508548  | -0.0787733530 |
| H31 | 10.1406413911 | 10.4204821679 | -0.8781284434 |
| H32 | 9.2373383568  | 10.4514878749 | 0.6491270484  |
| H33 | 8.9459389435  | 9.1372822878  | -0.5091378739 |
| C34 | 11.5470962106 | 8.2107086906  | -0.1570163000 |
| C35 | 11.4496463285 | 7.8904606436  | -1.5127211522 |
| H36 | 10.6782788100 | 8.3469786190  | -2.1252880345 |
| C37 | 12.3345627528 | 6.9509722150  | -2.0592520504 |
| H38 | 12.2552143451 | 6.6968070402  | -3.1132752431 |
| C39 | 13.2867815020 | 6.3257493203  | -1.2652695877 |

|     |               |               |               |
|-----|---------------|---------------|---------------|
| H40 | 13.9479277247 | 5.5749086907  | -1.6880661878 |
| C41 | 13.3979107447 | 6.6516679220  | 0.0988290666  |
| H42 | 14.1120706579 | 6.1246595702  | 0.7192307160  |
| C43 | 12.5606832300 | 7.6149009515  | 0.6395125077  |
| C44 | 13.4564066397 | 8.0449983910  | 2.9307149014  |
| C45 | 14.7775340459 | 7.6341270559  | 2.8460827902  |
| H46 | 15.1875378197 | 7.2608614898  | 1.9168562494  |
| C47 | 15.6079831477 | 7.7400066444  | 3.9764246480  |
| H48 | 16.6400085293 | 7.4079289321  | 3.9087774288  |
| C49 | 15.1171825111 | 8.2689762411  | 5.1616104295  |
| H50 | 15.7639961060 | 8.3450622173  | 6.0320772034  |
| C51 | 13.7940312522 | 8.7240089313  | 5.2479699145  |
| H52 | 13.4185376760 | 9.1619677473  | 6.1676305397  |
| C53 | 12.9616736218 | 8.6153314456  | 4.1332181175  |
| C54 | 11.0265003502 | 9.7363284877  | 5.0732259610  |
| H55 | 10.9984482698 | 9.1257460727  | 5.9864643029  |
| H56 | 9.9994435036  | 9.9531416815  | 4.7780183601  |
| H57 | 11.5489728314 | 10.6797893631 | 5.2973039476  |
| N58 | 9.5701711624  | 8.3662132449  | 2.8328977818  |
| N59 | 10.7605668875 | 9.0424380829  | 0.5705739548  |
| N60 | 12.4656763995 | 8.0794872865  | 1.9516591984  |
| N61 | 11.6711477010 | 9.0163155837  | 4.0067688982  |
| P62 | 10.9732456320 | 8.9544166989  | 2.3678076581  |
| F63 | 10.9962679819 | 10.6178776246 | 2.3525038285  |

**Ph<sub>3</sub>P=NPh**

E(M06-2X/6-311+G\*\*) = -1322.511101829

H(M06-2X/6-31+G\*) = -1321.864826

E(BP86/6-31G\*) = -1322.684667119

|     |               |               |               |
|-----|---------------|---------------|---------------|
| C1  | 0.0373849229  | 5.4267982798  | 6.2100639824  |
| C2  | -1.0165348485 | 4.9163336101  | 6.9678202958  |
| C3  | -1.2489552530 | 3.5438263242  | 7.0006906904  |
| C4  | -0.4269657764 | 2.6787404292  | 6.2716031837  |
| C5  | 0.6323704744  | 3.1887344294  | 5.5185432181  |
| C6  | 0.8613142584  | 4.5633807122  | 5.4901870521  |
| H7  | 0.2191040700  | 6.4973886205  | 6.1868179026  |
| H8  | -1.6531575530 | 5.5859659024  | 7.5383312907  |
| H9  | -2.0575167754 | 3.1497188222  | 7.6119740872  |
| H10 | 1.2694574847  | 2.4951247809  | 4.9778089062  |
| H11 | 1.6870985290  | 4.9599709527  | 4.9070405656  |
| C12 | -4.4223998669 | 0.3027454324  | 3.5258690785  |
| C13 | -3.1722286268 | -0.1898907093 | 3.1591831845  |
| C14 | -2.0769012905 | -0.0174399365 | 4.0048412279  |
| C15 | -2.2350196619 | 0.6432203873  | 5.2257022944  |
| C16 | -3.4933235763 | 1.1367453147  | 5.5909534860  |
| C17 | -4.5833452772 | 0.9684434827  | 4.7419661322  |
| H18 | -5.2737298406 | 0.1701537526  | 2.8645919418  |
| H19 | -3.0462959914 | -0.7084520723 | 2.2135882539  |
| H20 | -1.0961498103 | -0.3929428065 | 3.7237438897  |
| H21 | -3.6283226966 | 1.6497804364  | 6.5399341129  |
| H22 | -5.5570216634 | 1.3551776665  | 5.0277957206  |
| C23 | -1.7689519974 | -0.2464694689 | 10.5998849664 |
| C24 | -0.6894808373 | 0.5888270777  | 10.3111233470 |
| C25 | -0.4179760038 | 0.9433520991  | 8.9933092761  |
| C26 | -1.2292247636 | 0.4705782289  | 7.9541425420  |
| C27 | -2.3022811755 | -0.3753342453 | 8.2482676892  |
| C28 | -2.5716347236 | -0.7300798150 | 9.5693350223  |
| H29 | -1.9809783194 | -0.5237056433 | 11.6283163952 |



|     |               |               |               |
|-----|---------------|---------------|---------------|
| H30 | -0.0583362709 | 0.9615121545  | 11.1121406688 |
| H31 | 0.4277721877  | 1.5889250066  | 8.7670788725  |
| H32 | -2.9316366705 | -0.7597121524 | 7.4494597156  |
| H33 | -3.4073301650 | -1.3870463737 | 9.7911633742  |
| P34 | -0.7343627740 | 0.8904718409  | 6.2441011953  |
| N35 | 0.5788004878  | 0.2217950264  | 5.6734469149  |
| C36 | 1.5487304477  | -3.8627075944 | 5.2264199944  |
| C37 | 2.4581161673  | -2.8471741303 | 4.9203233802  |
| C38 | 2.1130825910  | -1.5123989019 | 5.0824936366  |
| C39 | 0.8397921908  | -1.1372968021 | 5.5564480367  |
| C40 | -0.0669411560 | -2.1726590215 | 5.8601953098  |
| C41 | 0.2868400574  | -3.5106223028 | 5.6974434137  |
| H42 | 1.8205384240  | -4.9060148623 | 5.0998918589  |
| H43 | 3.4491681082  | -3.0996312380 | 4.5521258200  |
| H44 | 2.8193537964  | -0.7209547152 | 4.8484661872  |
| H45 | -1.0621124348 | -1.9299797154 | 6.2255624494  |
| H46 | -0.4376542858 | -4.2831804002 | 5.9421167803  |

**Ph<sub>3</sub>P=NPh-H<sup>+</sup>**

E(M06-2X/6-311+G\*\*) = -1322.926215820

H(M06-2X/6-31+G\*) = -1322.26305

|    |               |              |              |
|----|---------------|--------------|--------------|
| C1 | -0.0472572328 | 5.4962446212 | 6.3076604130 |
| C2 | -0.0384192416 | 4.7622287719 | 7.4925986020 |
| C3 | -0.2985255165 | 3.3945193901 | 7.4690256714 |
| C4 | -0.5703473238 | 2.7702274555 | 6.2462598439 |
| C5 | -0.5930109115 | 3.5084196275 | 5.0539411614 |

|     |               |               |               |
|-----|---------------|---------------|---------------|
| C6  | -0.3239642900 | 4.8724739568  | 5.0904154662  |
| H7  | 0.1541287319  | 6.5625885120  | 6.3328025594  |
| H8  | 0.1659626665  | 5.2545153661  | 8.4376848546  |
| H9  | -0.3017841260 | 2.8256385884  | 8.3944079679  |
| H10 | -0.8314983190 | 3.0254029212  | 4.1090188631  |
| H11 | -0.3391191310 | 5.4498342562  | 4.1718486440  |
| C12 | -4.2924726880 | 0.2929685766  | 3.2251970401  |
| C13 | -3.1000275280 | -0.4114976121 | 3.0743779419  |
| C14 | -2.0493642078 | -0.2063415205 | 3.9662548504  |
| C15 | -2.2077358653 | 0.7081470284  | 5.0125493575  |
| C16 | -3.3999887461 | 1.4327209698  | 5.1554330494  |
| C17 | -4.4424216458 | 1.2169637541  | 4.2611307750  |
| H18 | -5.1068360290 | 0.1313177389  | 2.5259563020  |
| H19 | -2.9824347735 | -1.1172215711 | 2.2585939622  |
| H20 | -1.1133058100 | -0.7435784065 | 3.8396791890  |
| H21 | -3.5073946842 | 2.1731310058  | 5.9456894226  |
| H22 | -5.3666411188 | 1.7761283712  | 4.3643531769  |
| C23 | -1.6713378529 | -0.7119784623 | 10.3225089115 |
| C24 | -0.3684866319 | -0.4033859599 | 9.9282023377  |
| C25 | -0.1301681319 | 0.1056618512  | 8.6566535001  |
| C26 | -1.2073653965 | 0.3090346480  | 7.7825106582  |
| C27 | -2.5123083924 | -0.0110722279 | 8.1704030372  |
| C28 | -2.7384940976 | -0.5197570330 | 9.4471779607  |
| H29 | -1.8532889359 | -1.1139964517 | 11.3142352177 |
| H30 | 0.4616695086  | -0.5691962909 | 10.6068980888 |
| H31 | 0.8864295916  | 0.3239396323  | 8.3376162840  |
| H32 | -3.3444445213 | 0.1173430981  | 7.4842344083  |
| H33 | -3.7480532981 | -0.7728001113 | 9.7539534517  |
| P34 | -0.8589710757 | 0.9994448421  | 6.1625795040  |
| C35 | 1.9368777869  | -3.6374292648 | 5.8835733477  |

|     |               |               |              |
|-----|---------------|---------------|--------------|
| C36 | 2.8204011718  | -2.5896675497 | 5.6298105214 |
| C37 | 2.3560974472  | -1.2813285621 | 5.5469745905 |
| C38 | 0.9937423850  | -1.0167644531 | 5.7045389793 |
| C39 | 0.1005636900  | -2.0611125142 | 5.9508715820 |
| C40 | 0.5813712586  | -3.3658845144 | 6.0455903664 |
| H41 | 2.3024310181  | -4.6563708193 | 5.9521701714 |
| H42 | 3.8797333185  | -2.7867327986 | 5.5001908842 |
| H43 | 3.0507479531  | -0.4658172005 | 5.3601558010 |
| H44 | -0.9636681508 | -1.8749995141 | 6.0704739897 |
| H45 | -0.1172028596 | -4.1732944705 | 6.2405725530 |
| N46 | 0.5608277470  | 0.3371160666  | 5.6060010943 |
| H47 | 1.2498265700  | 0.9979695106  | 5.2597882140 |

**Ph<sub>3</sub>P=NPh-Me<sup>+</sup>**

E(M06-2X/6-311+G\*\*) = -1362.216090551

H(M06-2X/6-31+G\*) = -1361.514391

|     |               |              |              |
|-----|---------------|--------------|--------------|
| C1  | -0.3261552774 | 5.5311804115 | 6.2968065282 |
| C2  | -0.4878660458 | 4.8707539700 | 7.5119135892 |
| C3  | -0.6001053285 | 3.4811343041 | 7.5436423333 |
| C4  | -0.5479114065 | 2.7621914952 | 6.3459974737 |
| C5  | -0.3987190781 | 3.4266109367 | 5.1196492008 |
| C6  | -0.2830834886 | 4.8108173854 | 5.1005144965 |
| H7  | -0.2405805503 | 6.6131774447 | 6.2775078447 |
| H8  | -0.5318385661 | 5.4345647838 | 8.4380080597 |
| H9  | -0.7346798681 | 2.9696725290 | 8.4922707330 |
| H10 | -0.3816800361 | 2.8654077909 | 4.1877090124 |
| H11 | -0.1673386341 | 5.3302536960 | 4.1547838568 |

|     |               |               |               |
|-----|---------------|---------------|---------------|
| C12 | -3.8777539185 | 0.0684119625  | 3.1709245523  |
| C13 | -2.6801003304 | -0.6406275601 | 3.1273598909  |
| C14 | -1.6857581210 | -0.4061562818 | 4.0755709171  |
| C15 | -1.9005562040 | 0.5530539631  | 5.0718920023  |
| C16 | -3.0998993718 | 1.2830969156  | 5.1030921313  |
| C17 | -4.0873542871 | 1.0327288868  | 4.1573576990  |
| H18 | -4.6470636358 | -0.1220760967 | 2.4292060863  |
| H19 | -2.5127054524 | -1.3811643405 | 2.3520894697  |
| H20 | -0.7586429655 | -0.9661594609 | 4.0254081769  |
| H21 | -3.2556757454 | 2.0593121471  | 5.8495734388  |
| H22 | -5.0130783092 | 1.5983847333  | 4.1825035423  |
| C23 | -1.9006607086 | -0.3578217518 | 10.5356792086 |
| C24 | -0.5710458254 | -0.0459656870 | 10.2459646479 |
| C25 | -0.2136755823 | 0.3355097530  | 8.9573758686  |
| C26 | -1.1952113414 | 0.4114140316  | 7.9593805648  |
| C27 | -2.5252305936 | 0.0895187135  | 8.2448321506  |
| C28 | -2.8723831081 | -0.2946799199 | 9.5388445524  |
| H29 | -2.1770983008 | -0.6614886628 | 11.5405080979 |
| H30 | 0.1865813300  | -0.1099256745 | 11.0202362119 |
| H31 | 0.8258815093  | 0.5531033300  | 8.7213478413  |
| H32 | -3.2834963320 | 0.1173632576  | 7.4678760611  |
| H33 | -3.9022140378 | -0.5517962838 | 9.7646116227  |
| P34 | -0.6714616462 | 0.9670048643  | 6.3261410471  |
| C35 | 1.4252737583  | -3.7138400205 | 4.9874254890  |
| C36 | 2.1587352541  | -2.7136786434 | 4.3533977131  |
| C37 | 1.9669950911  | -1.3756738502 | 4.6880502722  |
| C38 | 1.0431557566  | -1.0269631269 | 5.6791878566  |
| C39 | 0.3194024177  | -2.0304915080 | 6.3314802502  |
| C40 | 0.5065134067  | -3.3638778866 | 5.9732961887  |
| H41 | 1.5735034386  | -4.7548255137 | 4.7204168556  |

|     |               |               |              |
|-----|---------------|---------------|--------------|
| H42 | 2.8808295280  | -2.9695024190 | 3.5843911599 |
| H43 | 2.5279948799  | -0.6085056999 | 4.1649008945 |
| H44 | -0.3859428693 | -1.7904537011 | 7.1191563332 |
| H45 | -0.0641780978 | -4.1326531296 | 6.4845952399 |
| N46 | 0.8461310244  | 0.3622818138  | 5.9884047449 |
| C47 | 2.0080636750  | 1.2558529884  | 5.8312047846 |
| H48 | 2.8963190997  | 0.7023503004  | 6.1415591026 |
| H49 | 2.1330481538  | 1.5932561557  | 4.7971240104 |
| H50 | 1.9043547760  | 2.1298804471  | 6.4731493698 |

**Ph<sub>3</sub>P=NPh-F<sup>-</sup>**

E(M06-2X/6-311+G\*\*) = -1422.416484147

H(M06-2X/6-31+G\*) = -1421.737960

|     |               |              |              |
|-----|---------------|--------------|--------------|
| C1  | 0.5642866921  | 4.9460731679 | 5.5218752245 |
| C2  | 0.3222641051  | 4.4894127275 | 6.8163910203 |
| C3  | -0.1321974112 | 3.1872876103 | 7.0282574234 |
| C4  | -0.3764278916 | 2.3364413300 | 5.9489107698 |
| C5  | -0.1409013730 | 2.8032524700 | 4.6535132105 |
| C6  | 0.3382643662  | 4.0940996721 | 4.4405775483 |
| H7  | 0.9275270330  | 5.9573630840 | 5.3567650756 |
| H8  | 0.4977043867  | 5.1447935638 | 7.6664790674 |
| H9  | -0.2958983490 | 2.8349712305 | 8.0429322668 |
| H10 | -0.3369781963 | 2.1388134768 | 3.8141907796 |
| H11 | 0.5280930842  | 4.4394087023 | 3.4271379987 |
| C12 | -5.1591108466 | 2.0881627119 | 4.2958902973 |
| C13 | -4.4540453934 | 1.0637617288 | 3.6679564362 |
| C14 | -3.2383145150 | 0.6153771078 | 4.1942002274 |
| C15 | -2.6991620384 | 1.1765342981 | 5.3557188819 |

|     |               |               |               |
|-----|---------------|---------------|---------------|
| C16 | -3.4210994186 | 2.2114253613  | 5.9681954735  |
| C17 | -4.6345252523 | 2.6637433098  | 5.4549834856  |
| H18 | -6.1050003056 | 2.4379696296  | 3.8885805949  |
| H19 | -4.8512488259 | 0.6077722940  | 2.7631494609  |
| H20 | -2.6791034697 | -0.1843364519 | 3.7169291492  |
| H21 | -3.0291365577 | 2.6744942328  | 6.8742534104  |
| H22 | -5.1716618906 | 3.4659250897  | 5.9566690266  |
| C23 | -3.0781114536 | -0.6165092155 | 10.1556710758 |
| C24 | -1.8401067370 | 0.0220936412  | 10.1836326897 |
| C25 | -1.2124569369 | 0.3934821051  | 8.9937547130  |
| C26 | -1.8293338347 | 0.1752904151  | 7.7550870753  |
| C27 | -3.0707901618 | -0.4732303290 | 7.7433581865  |
| C28 | -3.6842821647 | -0.8778670317 | 8.9274912801  |
| H29 | -3.5616100376 | -0.9183815733 | 11.0815881621 |
| H30 | -1.3480749168 | 0.2157455502  | 11.1338689646 |
| H31 | -0.2199616978 | 0.8286322949  | 9.0193169001  |
| H32 | -3.5601704597 | -0.6702470526 | 6.7933232662  |
| H33 | -4.6409030076 | -1.3927252541 | 8.8891658669  |
| N34 | -0.7381349778 | -0.4697173315 | 4.9458354556  |
| C35 | 1.8216381334  | -3.8243284972 | 4.7521368257  |
| C36 | 1.5253448514  | -3.0528089166 | 3.6264885653  |
| C37 | 0.7053759785  | -1.9342945446 | 3.7248643127  |
| C38 | 0.1371914451  | -1.5261622617 | 4.9557060337  |
| C39 | 0.4476835162  | -2.3255545441 | 6.0840235456  |
| C40 | 1.2685774131  | -3.4418499197 | 5.9774245730  |
| H41 | 2.4625703898  | -4.6989887721 | 4.6779460517  |
| H42 | 1.9405624115  | -3.3246827586 | 2.6572372038  |
| H43 | 0.4741720523  | -1.3377839635 | 2.8454599144  |
| H44 | 0.0342133030  | -2.0476400963 | 7.0489094659  |
| H45 | 1.4809781691  | -4.0267662835 | 6.8709593653  |

|     |               |              |              |
|-----|---------------|--------------|--------------|
| P46 | -1.0166684807 | 0.5990714803 | 6.1178576137 |
| F47 | 0.5146351922  | 0.3350174866 | 6.9757411138 |

**Ph<sub>3</sub>P=NPh-He<sub>8</sub>-ring complex at 1.7 Å**

E(BP86/6-31G\*) = -1345.80204608

|     |               |               |               |
|-----|---------------|---------------|---------------|
| He1 | 2.0198000000  | 1.8633000000  | 11.4447000000 |
| He2 | 6.2280000042  | 3.2546000085  | 9.1306999790  |
| He3 | 4.8860000000  | 0.1785000000  | 10.2418000000 |
| He4 | 3.3618000000  | 4.9395000000  | 10.3336000000 |
| He5 | 3.1955000000  | 0.3896000000  | 11.1134000000 |
| He6 | 5.0726000055  | 4.7343999865  | 9.5021000131  |
| He7 | 6.1504000089  | 1.3674000025  | 9.4372000176  |
| He8 | 2.0974000000  | 3.7505000000  | 11.1382000000 |
| X9  | 4.1239000000  | 2.5590000000  | 10.2877000000 |
| P10 | 3.7918598338  | 2.3082223504  | 7.2020076611  |
| N11 | 3.3670999814  | 2.3457000025  | 8.7830999903  |
| C12 | -0.8866148136 | 1.8119380854  | 9.1341134939  |
| C13 | -0.0208655247 | 0.7067369890  | 9.0952820345  |
| C14 | 1.3629576327  | 0.8903234266  | 8.9739588262  |
| C15 | 1.9357257806  | 2.1827993412  | 8.8902877435  |
| C16 | 1.0450111472  | 3.2833502753  | 8.9179262677  |
| C17 | -0.3410469115 | 3.1020557128  | 9.0422189322  |
| H18 | -1.9690221499 | 1.6695817390  | 9.2296130326  |
| H19 | -0.4264680761 | -0.3108210441 | 9.1552333919  |
| H20 | 2.0323867325  | 0.0238332481  | 8.9382359231  |
| H21 | 1.4547374115  | 4.2963839635  | 8.8458504508  |

|     |               |               |              |
|-----|---------------|---------------|--------------|
| H22 | -0.9991617117 | 3.9798560175  | 9.0624980394 |
| C23 | 0.7598935734  | 0.2363144173  | 4.2724285259 |
| C24 | 1.9809148265  | -0.3955802618 | 4.5470308154 |
| C25 | 2.9116379196  | 0.2022834317  | 5.4131353076 |
| C26 | 2.6374601752  | 1.4472990907  | 6.0153415026 |
| C27 | 1.4084536839  | 2.0824533103  | 5.7180643370 |
| C28 | 0.4786269865  | 1.4800029365  | 4.8608441146 |
| H29 | 0.0342070154  | -0.2327417748 | 3.5983967259 |
| H30 | 2.2193831002  | -1.3597570452 | 4.0831871561 |
| H31 | 3.8663344259  | -0.2999797447 | 5.5936471541 |
| H32 | 1.1735298987  | 3.0526292028  | 6.1657178643 |
| H33 | -0.4703911722 | 1.9867557661  | 4.6525743762 |
| C34 | 7.8314338744  | 0.1100294770  | 6.4418713499 |
| C35 | 7.7206903008  | 1.4679574715  | 6.1106837999 |
| C36 | 6.5187927589  | 2.1562511335  | 6.3404904321 |
| C37 | 5.4162213449  | 1.4924933773  | 6.9127809903 |
| C38 | 5.5459707127  | 0.1312876577  | 7.2680914942 |
| C39 | 6.7413778269  | -0.5578062330 | 7.0239163912 |
| H40 | 8.7683349038  | -0.4269936229 | 6.2550017761 |
| H41 | 8.5734101399  | 1.9982547776  | 5.6717539642 |
| H42 | 6.4429314414  | 3.2153067103  | 6.0764411997 |
| H43 | 4.7129051385  | -0.3799941809 | 7.7624753464 |
| H44 | 6.8265404701  | -1.6148939674 | 7.3000728506 |
| C45 | 4.0153048697  | 6.4532757338  | 5.0351853426 |
| C46 | 3.7473872766  | 6.3852886059  | 6.4095754077 |
| C47 | 3.7028427974  | 5.1395675460  | 7.0574558630 |
| C48 | 3.9221970305  | 3.9526145792  | 6.3377961401 |
| C49 | 4.1747946046  | 4.0278315939  | 4.9490079858 |
| C50 | 4.2283878227  | 5.2711948352  | 4.3046103326 |
| H51 | 4.0506343701  | 7.4246127678  | 4.5285844049 |



|     |              |              |              |
|-----|--------------|--------------|--------------|
| H52 | 3.5715309462 | 7.3029447529 | 6.9825576414 |
| H53 | 3.4935015362 | 5.0769190975 | 8.1272377407 |
| H54 | 4.3197391880 | 3.1091738860 | 4.3688417029 |
| H55 | 4.4283533404 | 5.3183656066 | 3.2278636616 |

**Ph<sub>3</sub>P=NPh-He<sub>8</sub>-ring complex at 2.2 Å**

E(BP86/6-31G\*) = -1345.816179790

|     |               |               |               |
|-----|---------------|---------------|---------------|
| He1 | 2.0198000000  | 1.8633000000  | 11.4447000000 |
| He2 | 6.2280000149  | 3.2546000333  | 9.1306999137  |
| He3 | 4.8860000000  | 0.1785000000  | 10.2418000000 |
| He4 | 3.3618000000  | 4.9395000000  | 10.3336000000 |
| He5 | 3.1955000000  | 0.3896000000  | 11.1134000000 |
| He6 | 5.0725999871  | 4.7343999006  | 9.5021000332  |
| He7 | 6.1504000408  | 1.3674000115  | 9.4372000811  |
| He8 | 2.0974000000  | 3.7505000000  | 11.1382000000 |
| X9  | 4.1239000000  | 2.5590000000  | 10.2877000000 |
| P10 | 3.6325620921  | 2.5657530081  | 6.8215871739  |
| N11 | 3.1430999572  | 2.2826000546  | 8.3378999720  |
| C12 | -1.0576296417 | 1.8901180070  | 9.0612241937  |
| C13 | -0.1599597879 | 0.8465755293  | 9.3417487145  |
| C14 | 1.2084782521  | 0.9960617533  | 9.0880436856  |
| C15 | 1.7385813370  | 2.1979429638  | 8.5532468265  |
| C16 | 0.8144715863  | 3.2359054382  | 8.2697820403  |
| C17 | -0.5571620116 | 3.0832373236  | 8.5197804305  |
| H18 | -2.1295338483 | 1.7722792091  | 9.2565170925  |
| H19 | -0.5300860131 | -0.0997694707 | 9.7558753231  |
| H20 | 1.9042944786  | 0.1784597681  | 9.3004835819  |

|     |               |               |              |
|-----|---------------|---------------|--------------|
| H21 | 1.1761274555  | 4.1744240013  | 7.8358638438 |
| H22 | -1.2401884559 | 3.9085863383  | 8.2828579527 |
| C23 | 0.7068111721  | 0.7776895285  | 3.6365022604 |
| C24 | 1.0314539109  | 0.0753846074  | 4.8075316193 |
| C25 | 1.9042453478  | 0.6392060128  | 5.7476062806 |
| C26 | 2.4761616759  | 1.9130905251  | 5.5251392670 |
| C27 | 2.1245275242  | 2.6195604336  | 4.3572715158 |
| C28 | 1.2495330093  | 2.0520824143  | 3.4178440801 |
| H29 | 0.0216184463  | 0.3376088299  | 2.9030242688 |
| H30 | 0.5935610814  | -0.9107945922 | 4.9983804366 |
| H31 | 2.1158605678  | 0.1035551415  | 6.6781517869 |
| H32 | 2.5226627770  | 3.6229905346  | 4.1798302322 |
| H33 | 0.9870066294  | 2.6149150228  | 2.5146735416 |
| C34 | 7.6882081143  | 0.4103720990  | 5.9762325708 |
| C35 | 7.6754721205  | 1.7932204265  | 6.2080582628 |
| C36 | 6.4640055082  | 2.4567078007  | 6.4567703833 |
| C37 | 5.2489550385  | 1.7421872122  | 6.4812836675 |
| C38 | 5.2736267356  | 0.3501629053  | 6.2502461796 |
| C39 | 6.4831510176  | -0.3101902442 | 5.9983428161 |
| H40 | 8.6342822614  | -0.1059316153 | 5.7774785359 |
| H41 | 8.6119627056  | 2.3624729308  | 6.1972875552 |
| H42 | 6.4688746538  | 3.5357980403  | 6.6346873398 |
| H43 | 4.3412216077  | -0.2224112271 | 6.2568704279 |
| H44 | 6.4833924593  | -1.3906662923 | 5.8155275481 |
| C45 | 4.3279476583  | 7.0357907050  | 5.6218001572 |
| C46 | 3.7062507120  | 6.7024624765  | 6.8339681534 |
| C47 | 3.5190164624  | 5.3552797296  | 7.1816118084 |
| C48 | 3.9461004010  | 4.3267913066  | 6.3213122405 |
| C49 | 4.5837227271  | 4.6716774458  | 5.1070606392 |
| C50 | 4.7700789366  | 6.0180327819  | 4.7599169382 |

|     |              |              |              |
|-----|--------------|--------------|--------------|
| H51 | 4.4756883010 | 8.0870924151 | 5.3496097782 |
| H52 | 3.3698740115 | 7.4912960807 | 7.5162231612 |
| H53 | 3.0550924524 | 5.0908428520 | 8.1355219753 |
| H54 | 4.9447688950 | 3.8856961904 | 4.4337346212 |
| H55 | 5.2652077775 | 6.2727606679 | 3.8157542057 |

## 7. References

---

- <sup>1</sup> J. Kobayashi, T. Agou, T. Kawashima. *Chem. Lett.* **2003**, 32, 1144–1145.
- <sup>2</sup> T. Shioiri, *TCI MAIL*. **2007**, 134, 2.
- <sup>3</sup> Rigaku Oxford Diffraction, **2020**, CrysAlisPro Software system, version 1.171.40.82a, Rigaku Corporation, Wroclaw, Poland.
- <sup>4</sup> O. V. Dolomanov, L. J. Bourhis, R. J. Gildea, J. A. K. Howard, H. Puschmann, *J. Appl. Crystallogr.* **2009**, 42, 339–341.
- <sup>5</sup> a) C. B. Hübschle, G. M.; Sheldrick, B. Dittrich, *J. Appl. Crystallogr.* **2011**, 44, 1281–1284. b) G. M. Sheldrick, *Acta Crystallogr. Sect. A Found. Crystallogr.* **2015**, 71, 3–8.
- <sup>6</sup> Jaguar 8.5, Schrodinger, Inc., New York, NY, **2014**.
- <sup>7</sup> K. O. Christe, D. A. Dixon, D. McLemore, W. W. Wilson, J. A. Sheehy, J. A. Boatz, *J. Fluorine Chem.*, **2000**, 101, 151–153.
- <sup>8</sup> J. W. Larson, T. B. McMahon, *Inorg. Chem.* **1987**, 26, 4018, and references cited therein.
- <sup>9</sup> P. Erdmann, J. Leitner, J. Schwarz, L. Greb, *Chem. Phys. Chem.* 2020, 21, 987-994.
- <sup>10</sup> NBO 6.0. E. D. Glendening, J. K. Badenhoop, A. E. Reed, J. E. Carpenter, J. A. Bohmann, C. M. Morales, C. R. Landis, and F. Weinhold (Theoretical Chemistry Institute, University of Wisconsin, Madison, WI, 2013)
- <sup>11</sup> J. Jover, N. Fey, M. Purdie, G. C. Lloyd-Jones, J. N. Harvey, *J. Mol. Catal. A. Chem.*, **2010**, 324, 39–47.
- <sup>12</sup> Falivene, L., Cao, Z., Petta, A. *et al.* Towards the online computer-aided design of catalytic pockets. *Nat. Chem.* **11**, 872–879 (2019).
- <sup>13</sup> F. M. Bickelhaupt, K. N. Houk, *Angew. Chem. Int. Ed.*, **2017**, 56, 10070–10086.
